# Supplementary material
Source: PubMed Central journal article supplement (PMC3998770)

SUPPORTING INFORMATION

PROTON NMR AND SELECTED CARBON NMR SPECTRA

for the  
communication  
entitled

**An Approach to Cyclohepta[b]indoles Through  
an Allenamide (4 + 3) Cycloaddition–Grignard Cyclization–Chugaev Elimination Sequence**

authored by

Shuzhong He, Richard P. Hsung,\* William R. Presser, Zhi-Xiong Ma, and Bryan J. Haugen

*Division of Pharmaceutical Sciences, School of Pharmacy, and Department of Chemistry, University of Wisconsin,  
Madison, WI 53705, United States*

Pulse Sequence: s2pul  
Spectrometer: 399.79  
Solvent: CDCl<sub>3</sub>

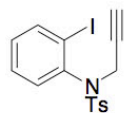

**S2a**

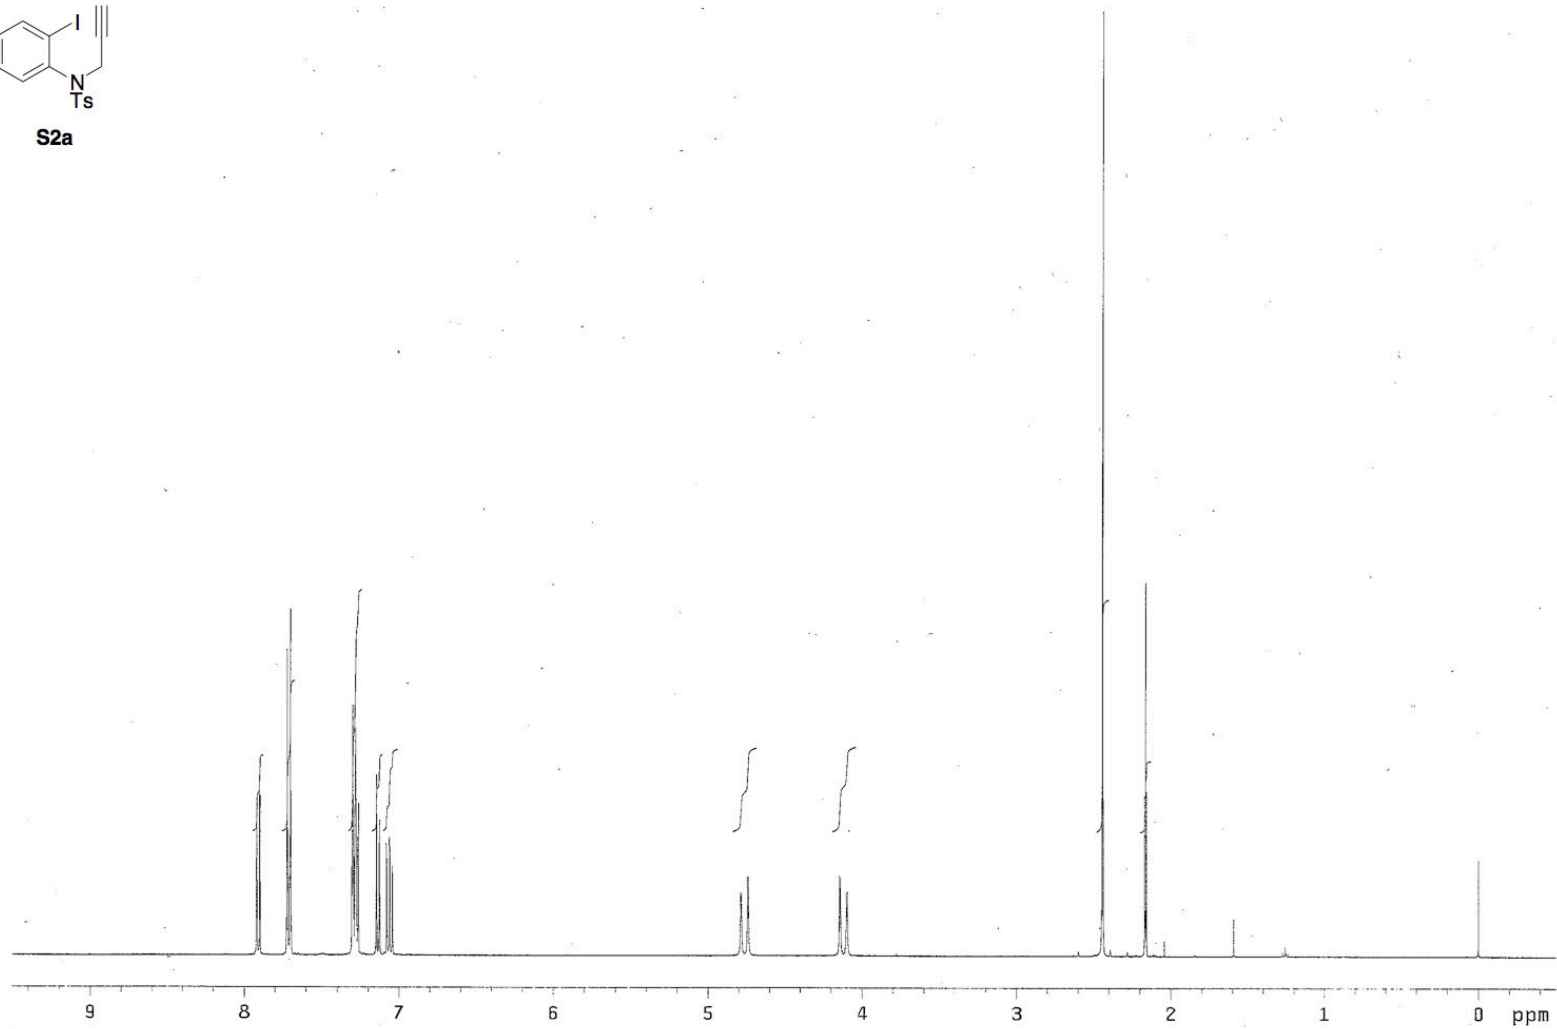



Pulse Sequence: s2pul  
Spectrometer: 399.79  
Solvent: CDCl<sub>3</sub>

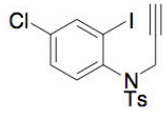

**S2b**

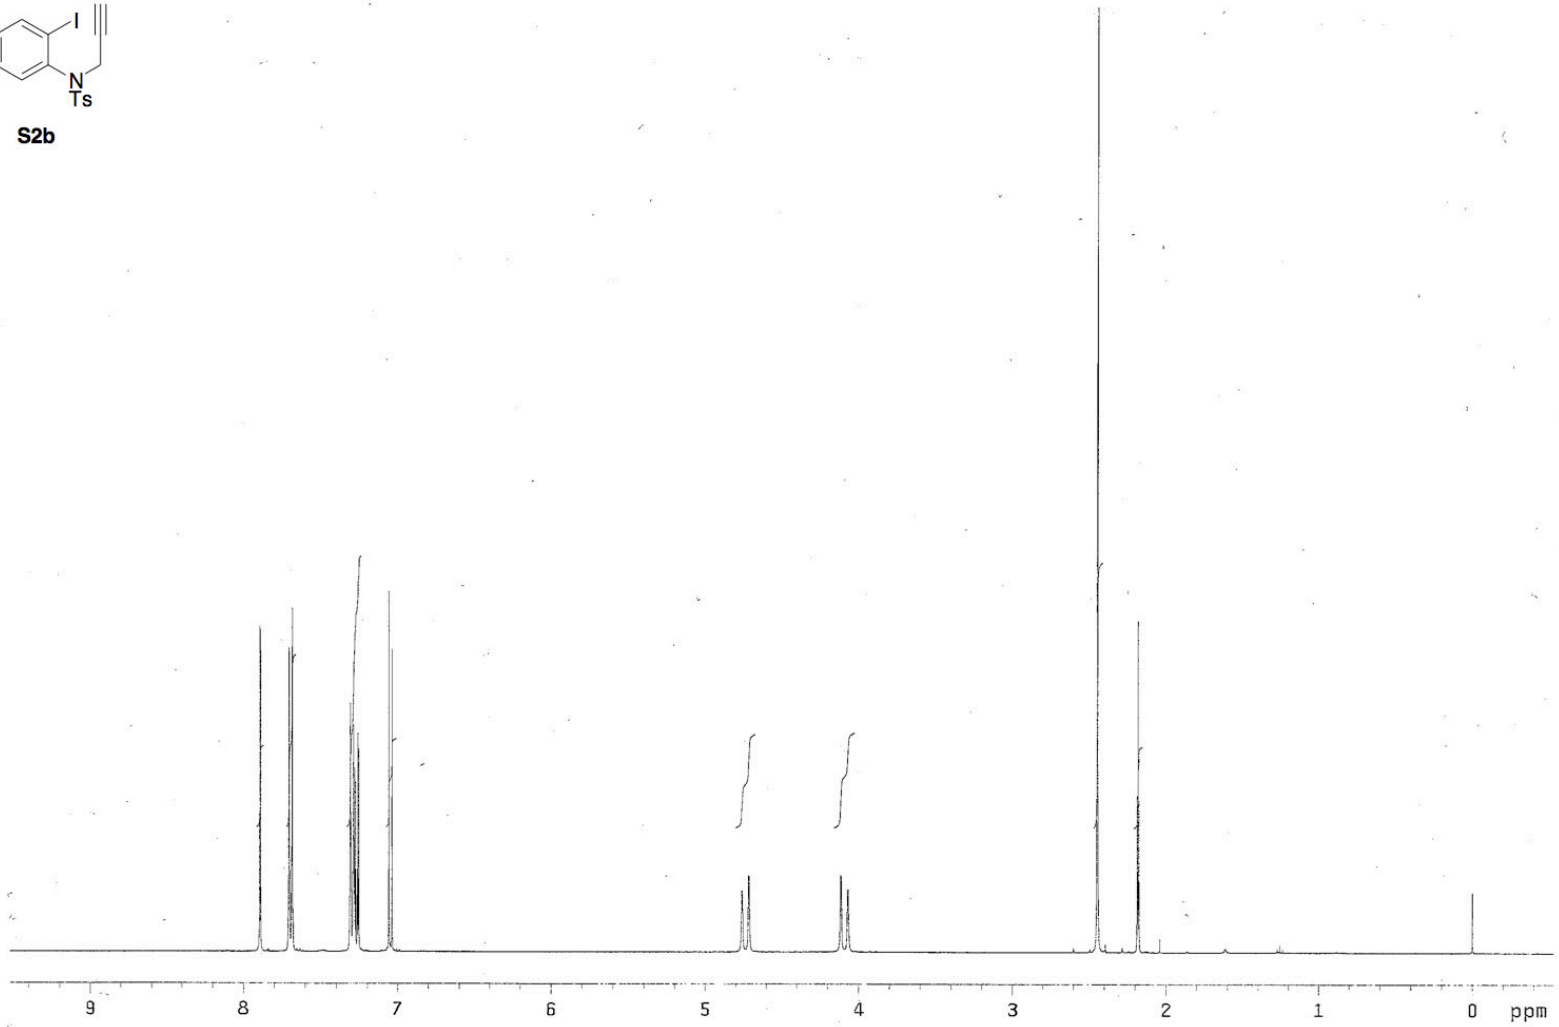



Pulse Sequence: s2pul  
Spectrometer: 100.53  
Solvent: CDCl<sub>3</sub>

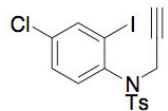

**S2b**

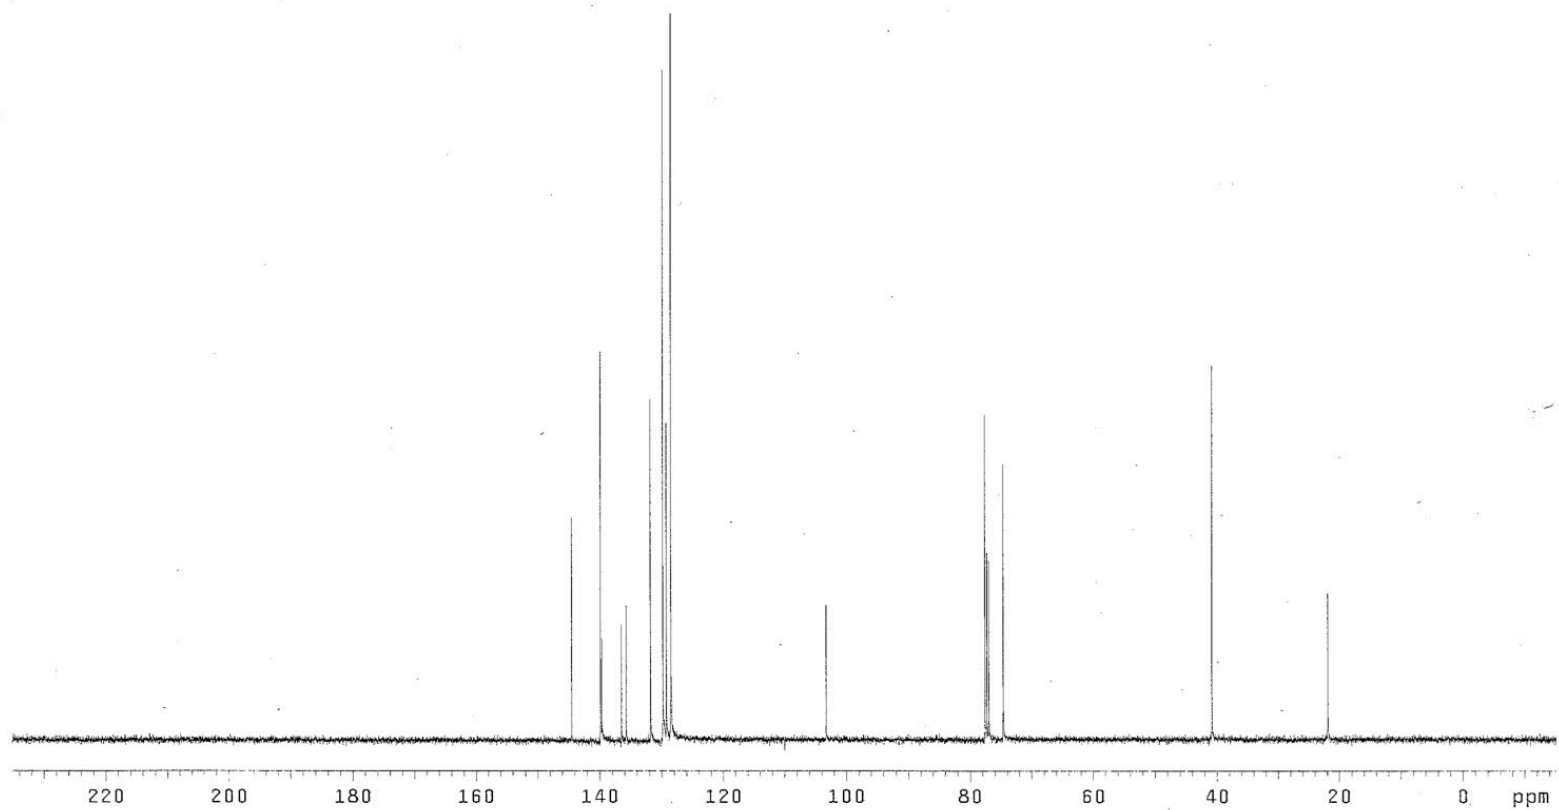

Pulse Sequence: s2pul  
Spectrometer: 399.79  
Solvent: CDCl<sub>3</sub>

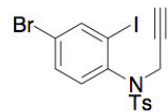

**S2c**

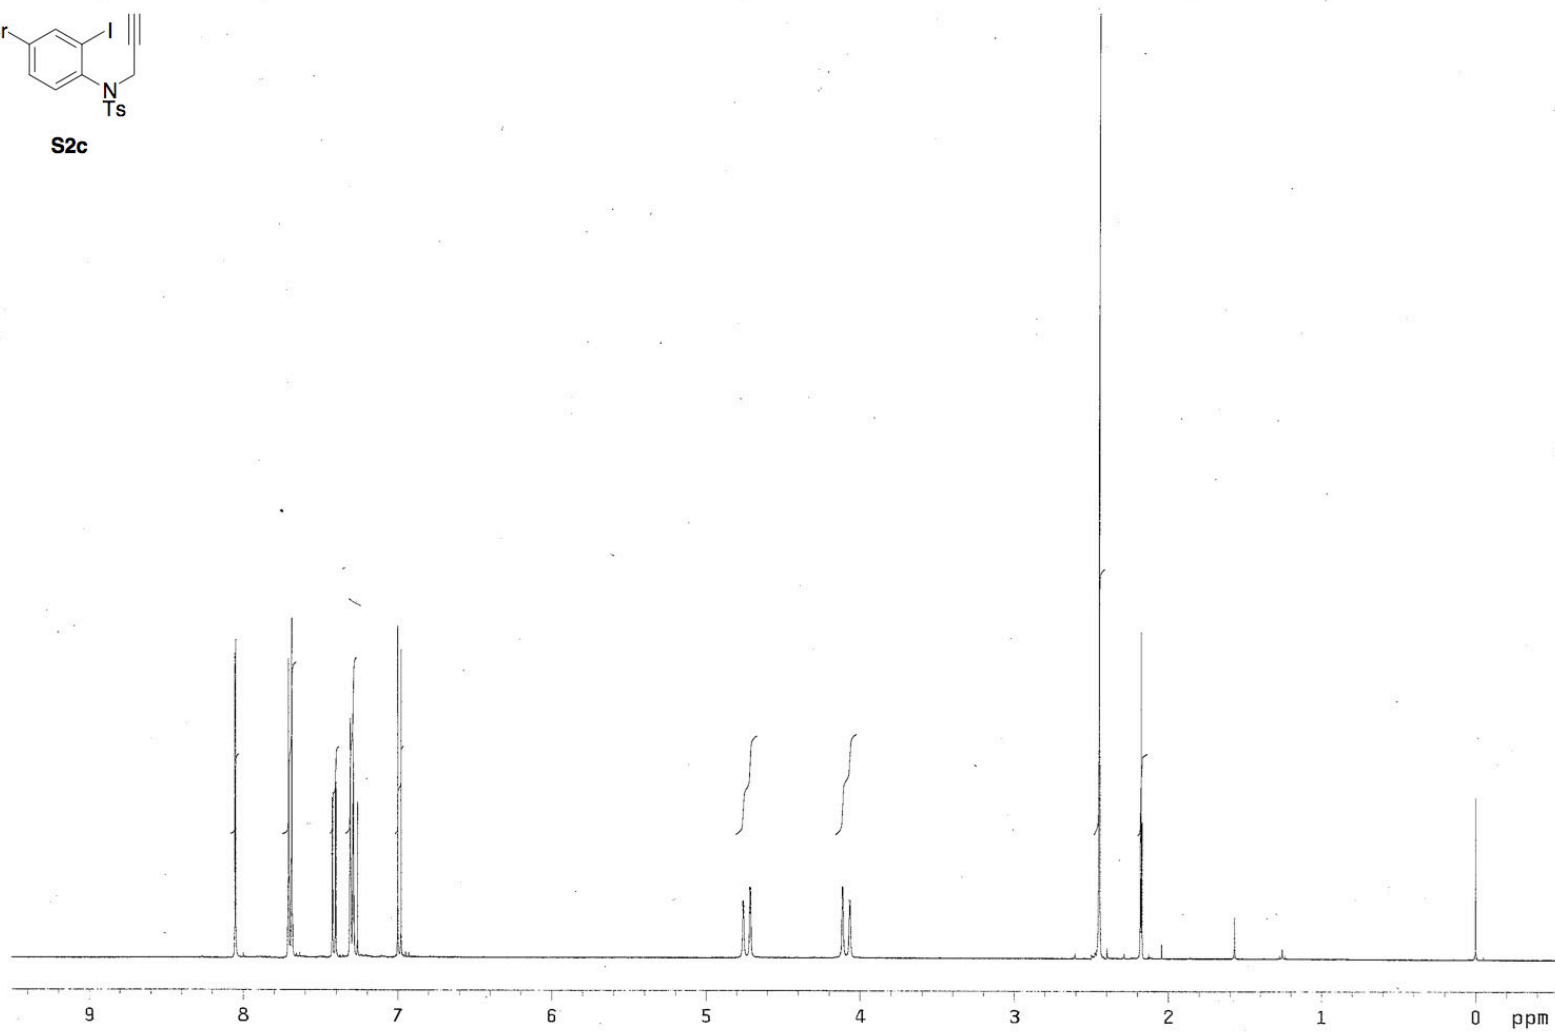

Pulse Sequence: s2pul  
Spectrometer: 100.53  
Solvent: CDCl<sub>3</sub>

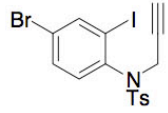

**S2c**

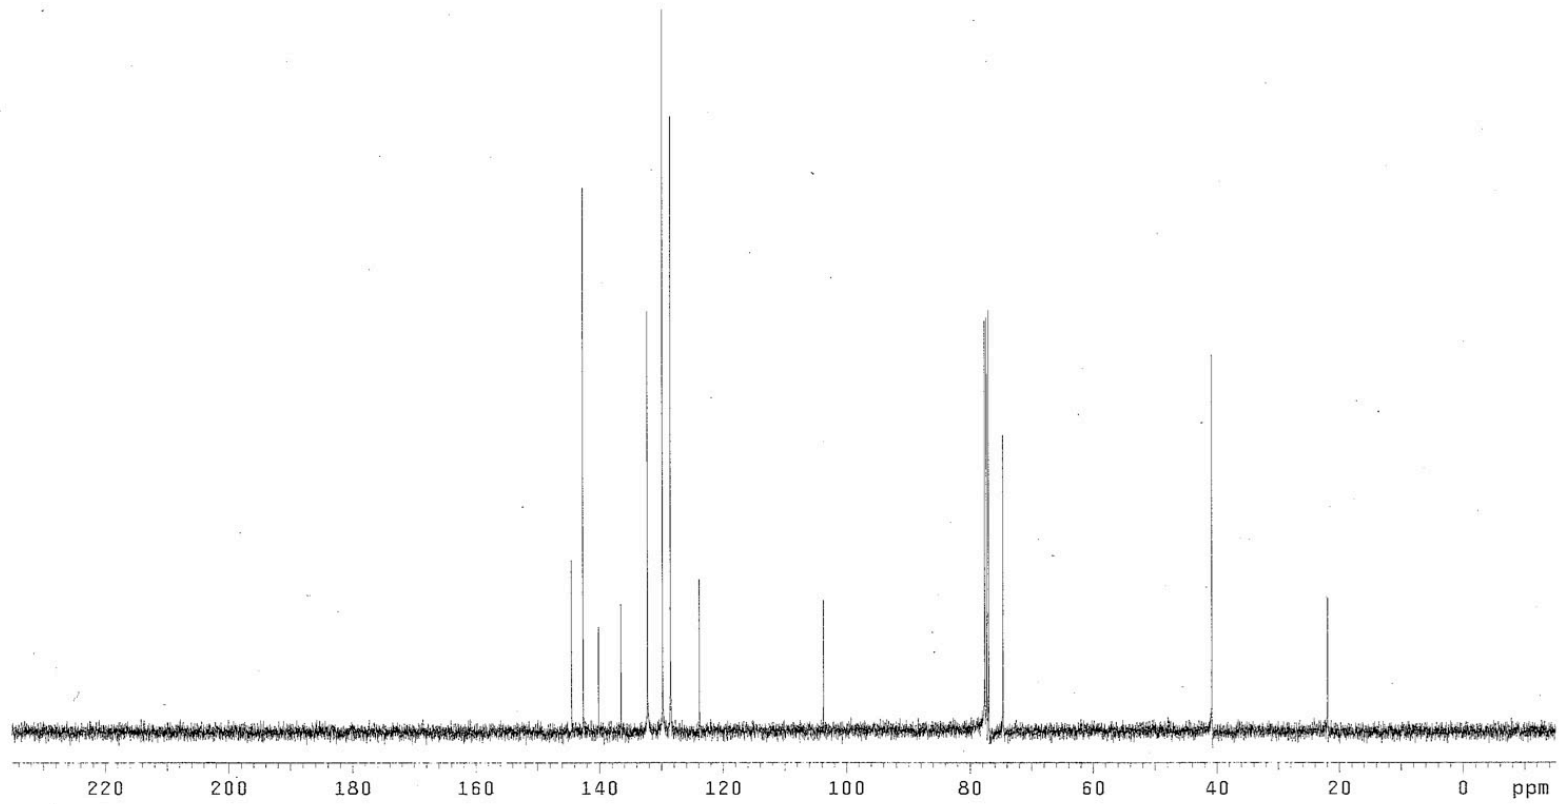

Pulse Sequence: s2pul  
Spectrometer: 399.79  
Solvent: CDCl<sub>3</sub>

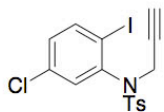

**S2d**

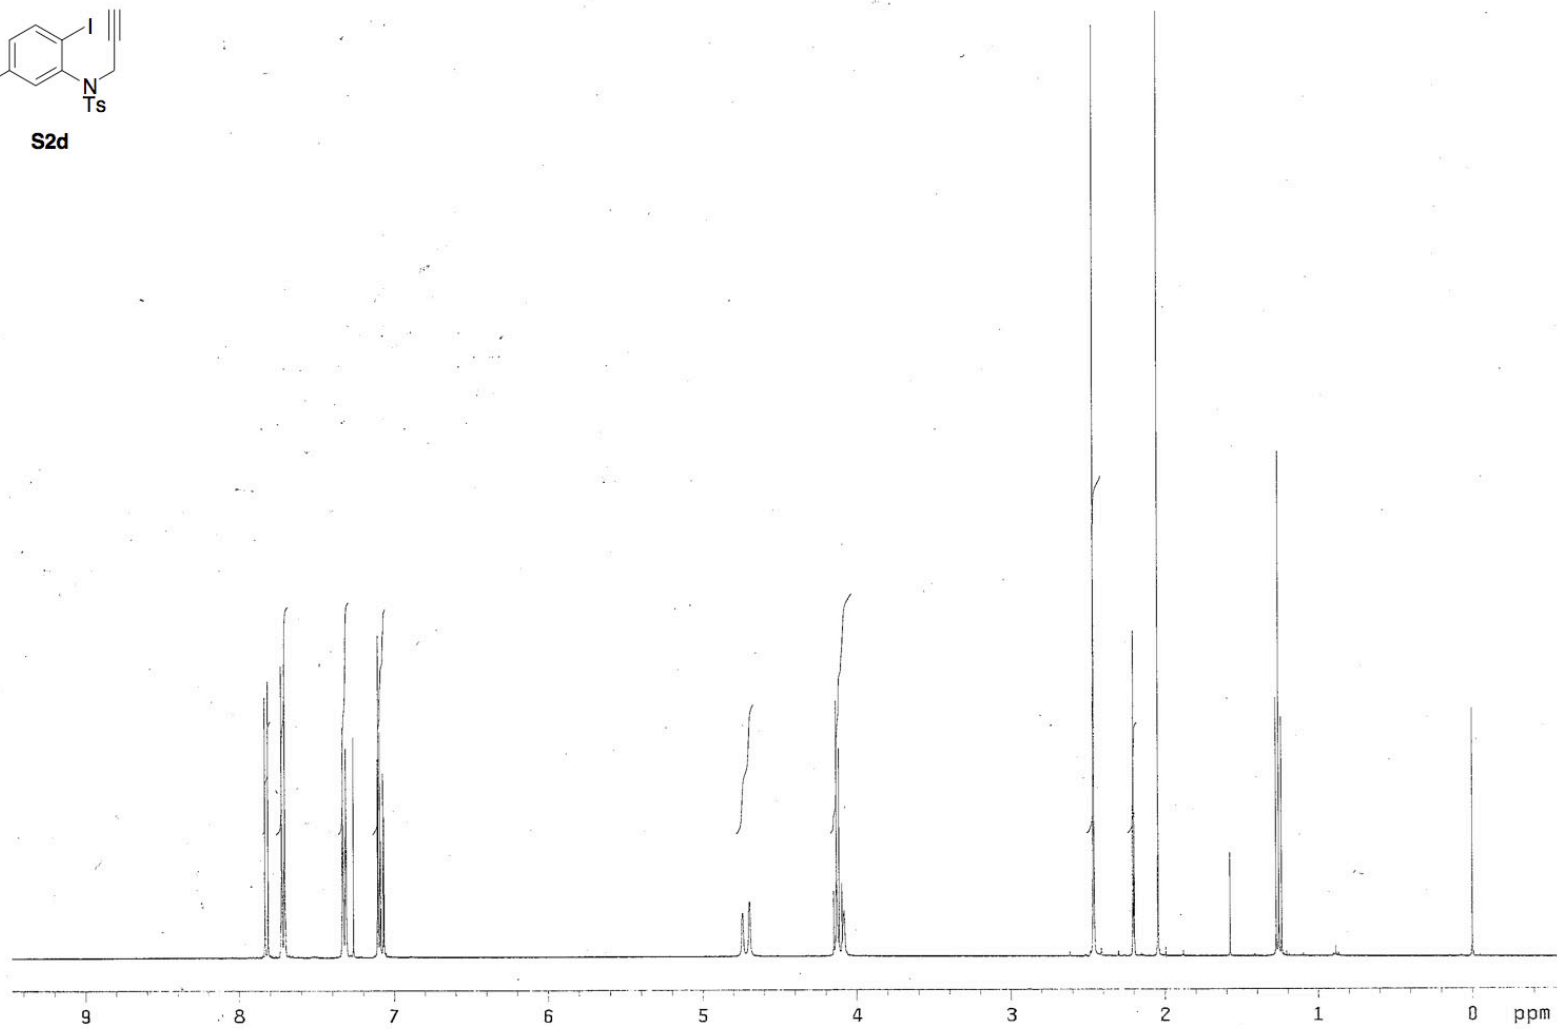

Pulse Sequence: s2pul  
Spectrometer: 100.53  
Solvent: CDCl<sub>3</sub>

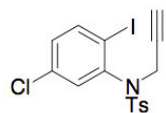

**S2d**

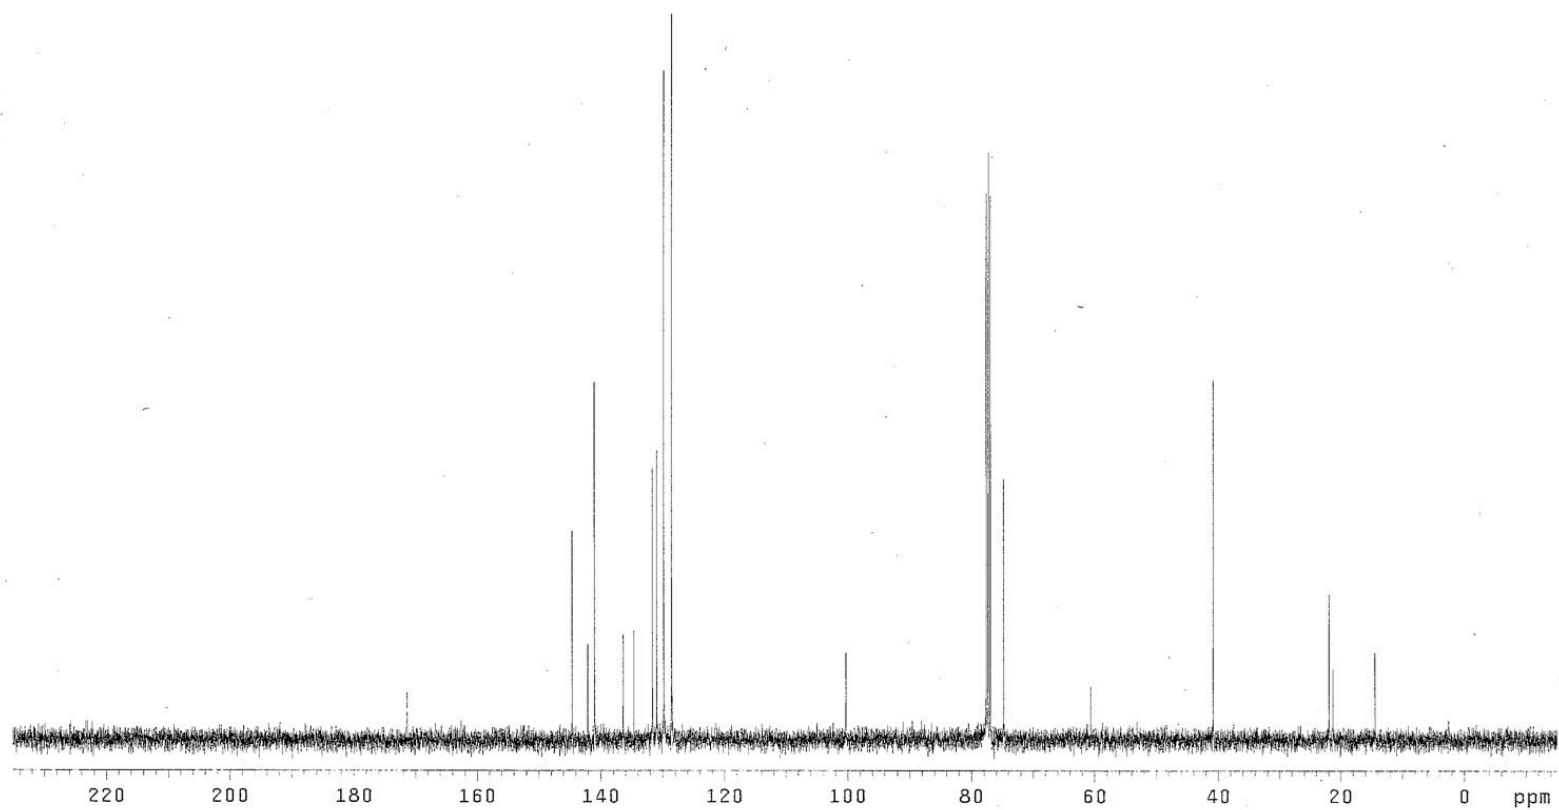

Pulse Sequence: s2pul  
Spectrometer: 399.79  
Solvent: CDCl<sub>3</sub>

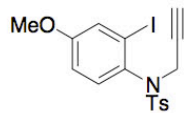

S2e

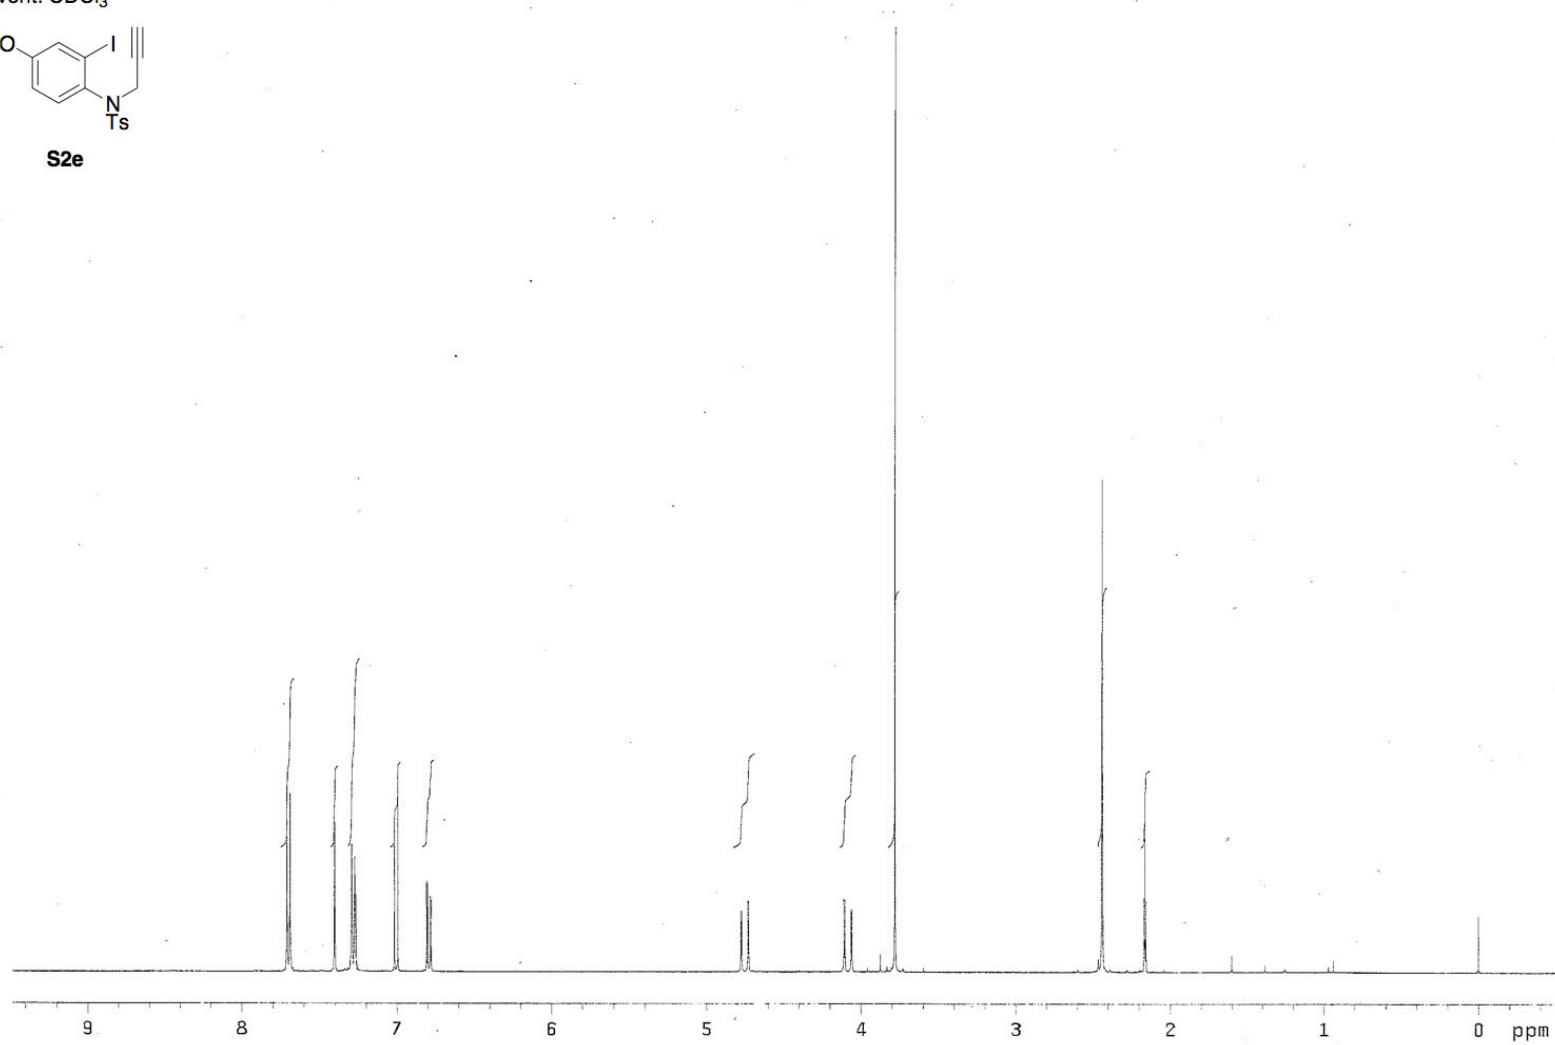

Pulse Sequence: s2pul  
Spectrometer: 100.53  
Solvent: CDCl<sub>3</sub>

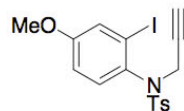

S2e

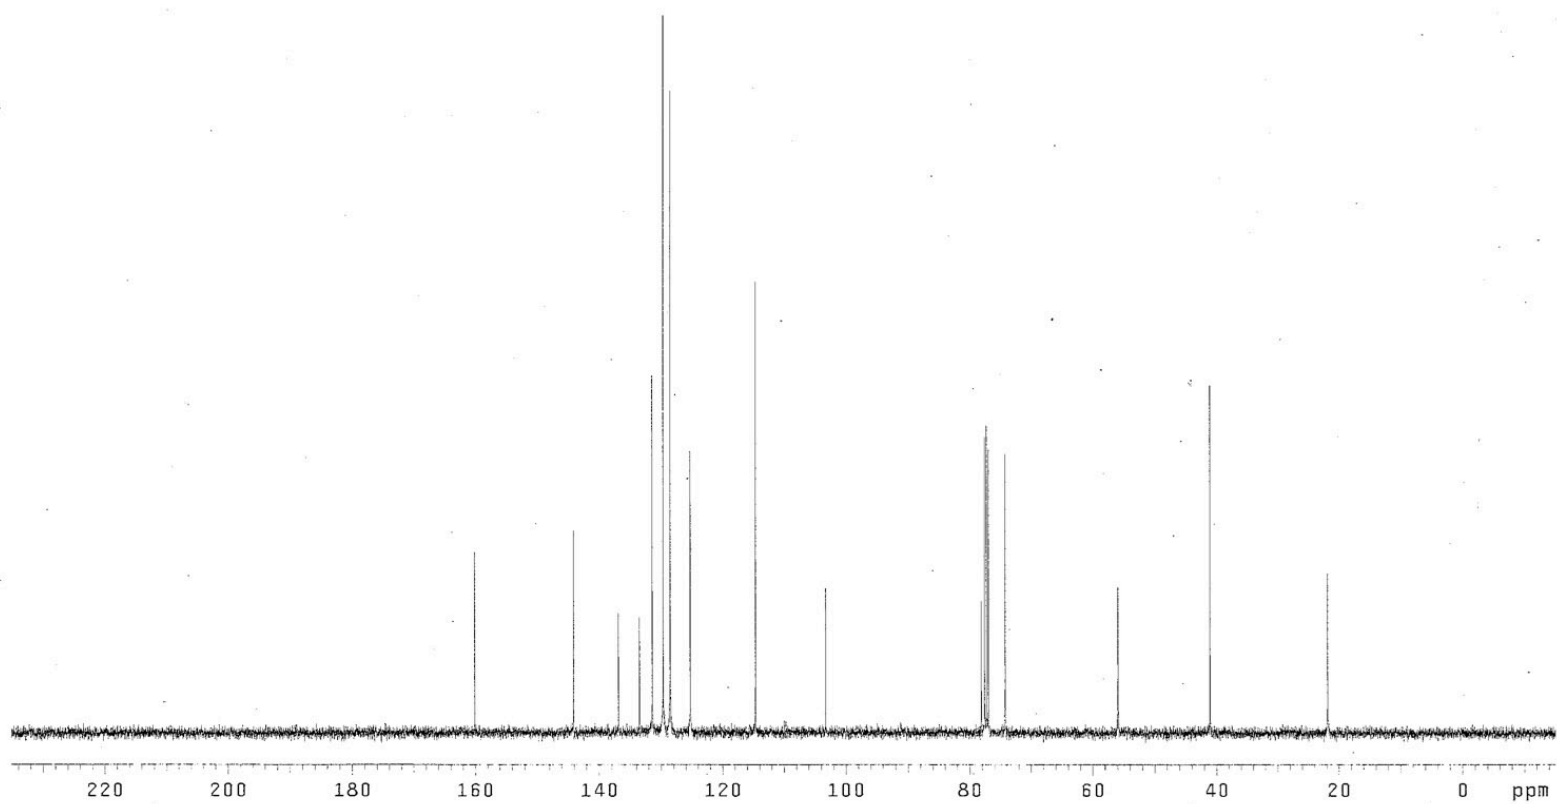

Pulse Sequence: s2pul  
Spectrometer: 399.79  
Solvent: CDCl<sub>3</sub>

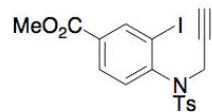

**S2f**

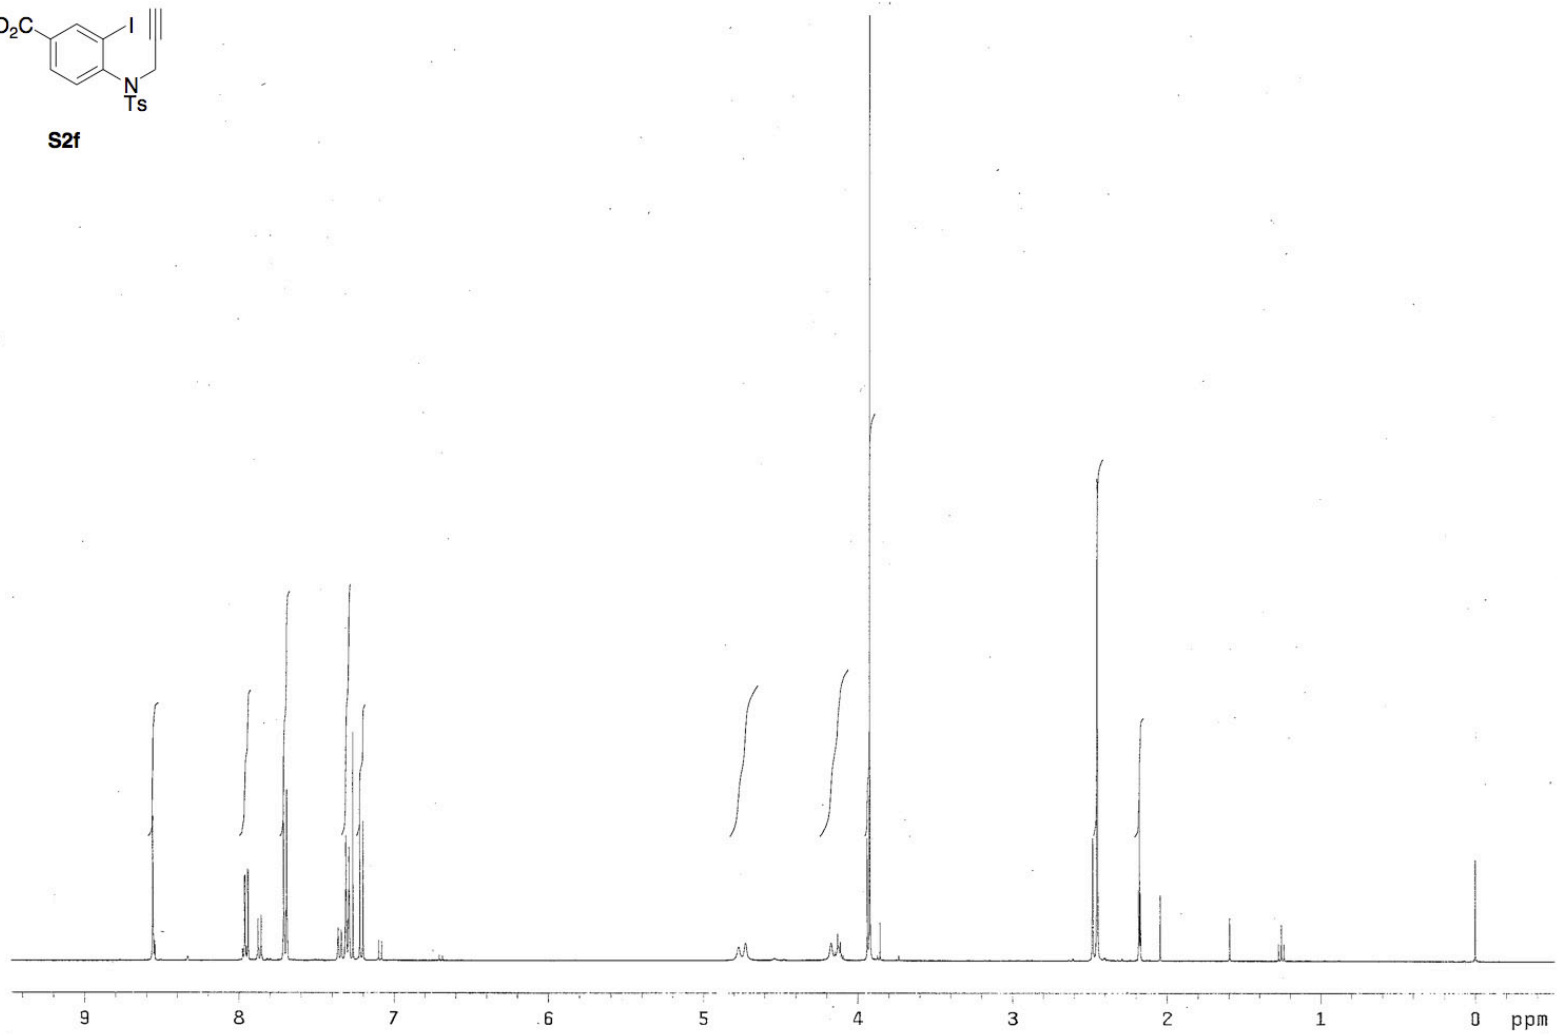



Pulse Sequence: s2pul  
Spectrometer: 100.53  
Solvent: CDCl<sub>3</sub>

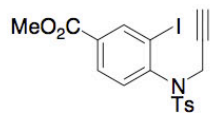

S2f

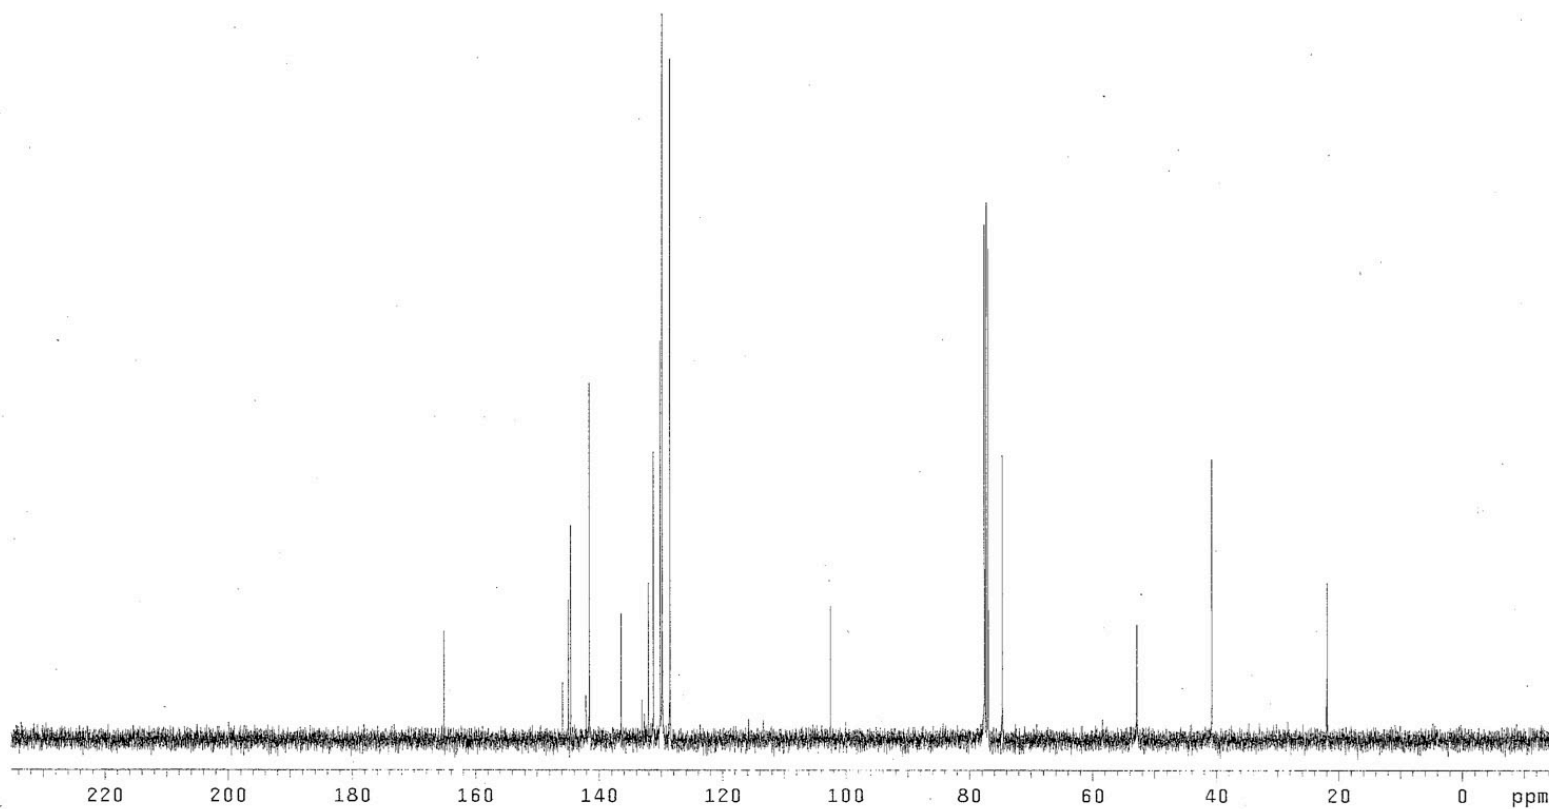

Pulse Sequence: s2pul  
Spectrometer: 399.79  
Solvent: CDCl<sub>3</sub>

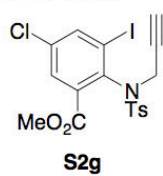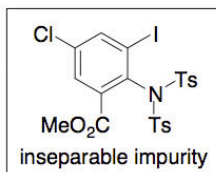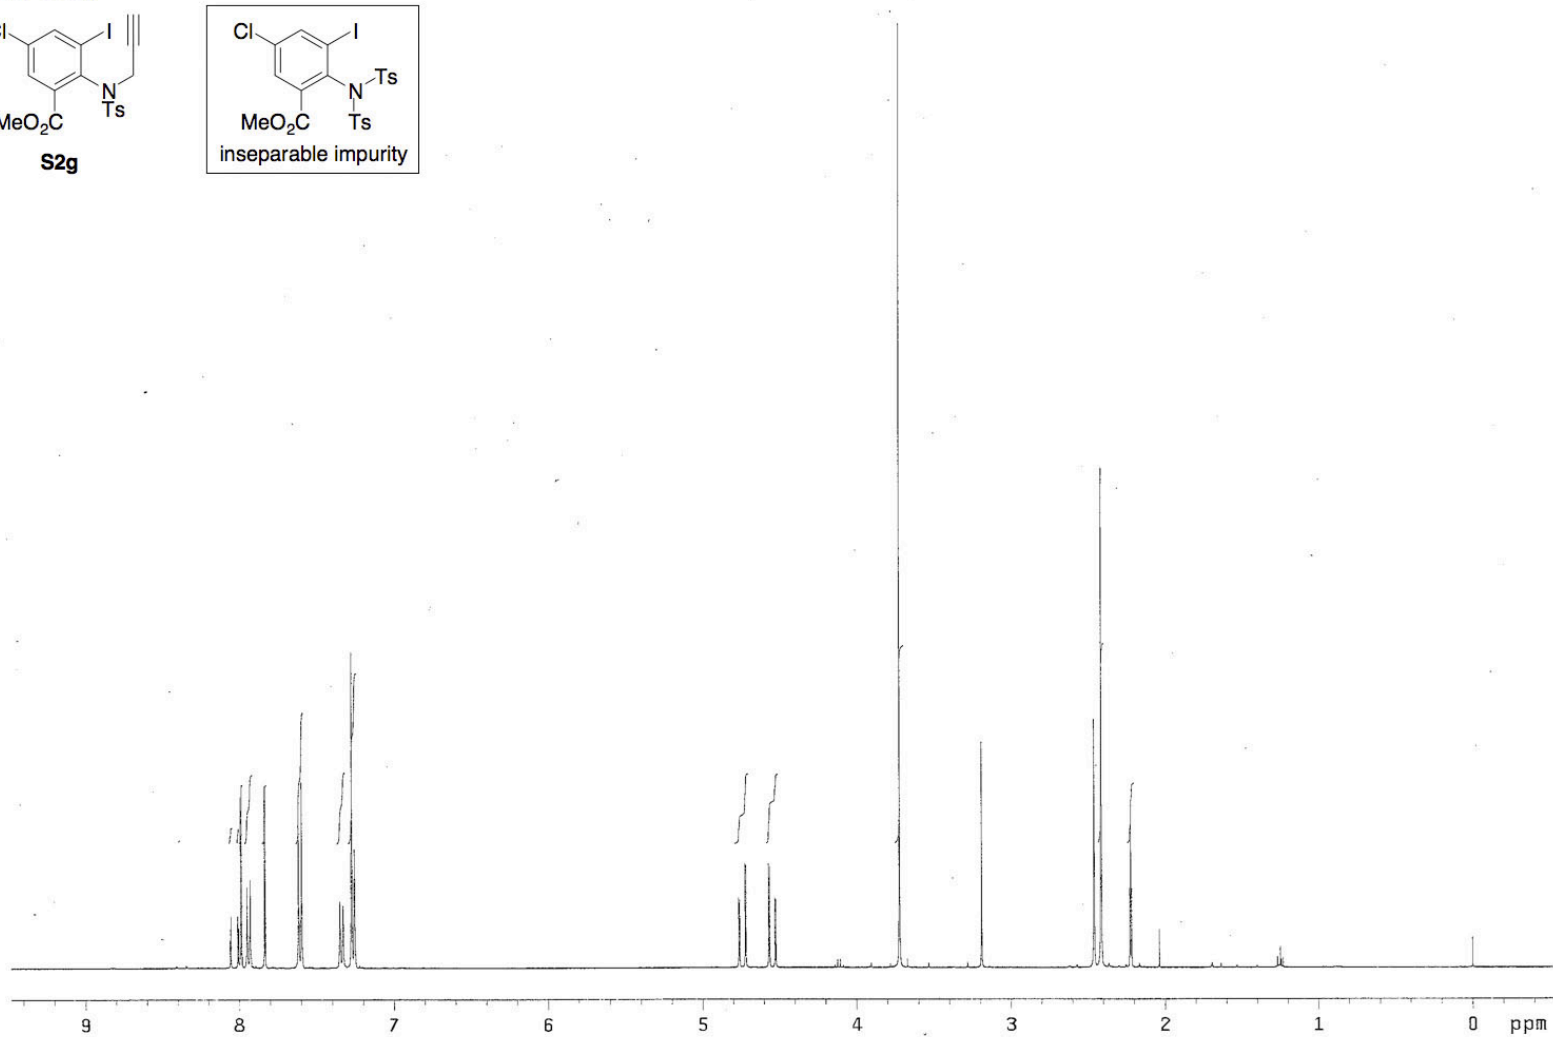

Pulse Sequence: s2pul  
Spectrometer: 100.53  
Solvent: CDCl<sub>3</sub>

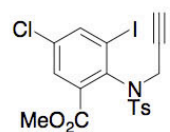

**S2g**

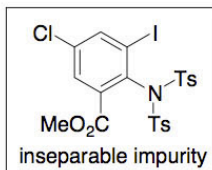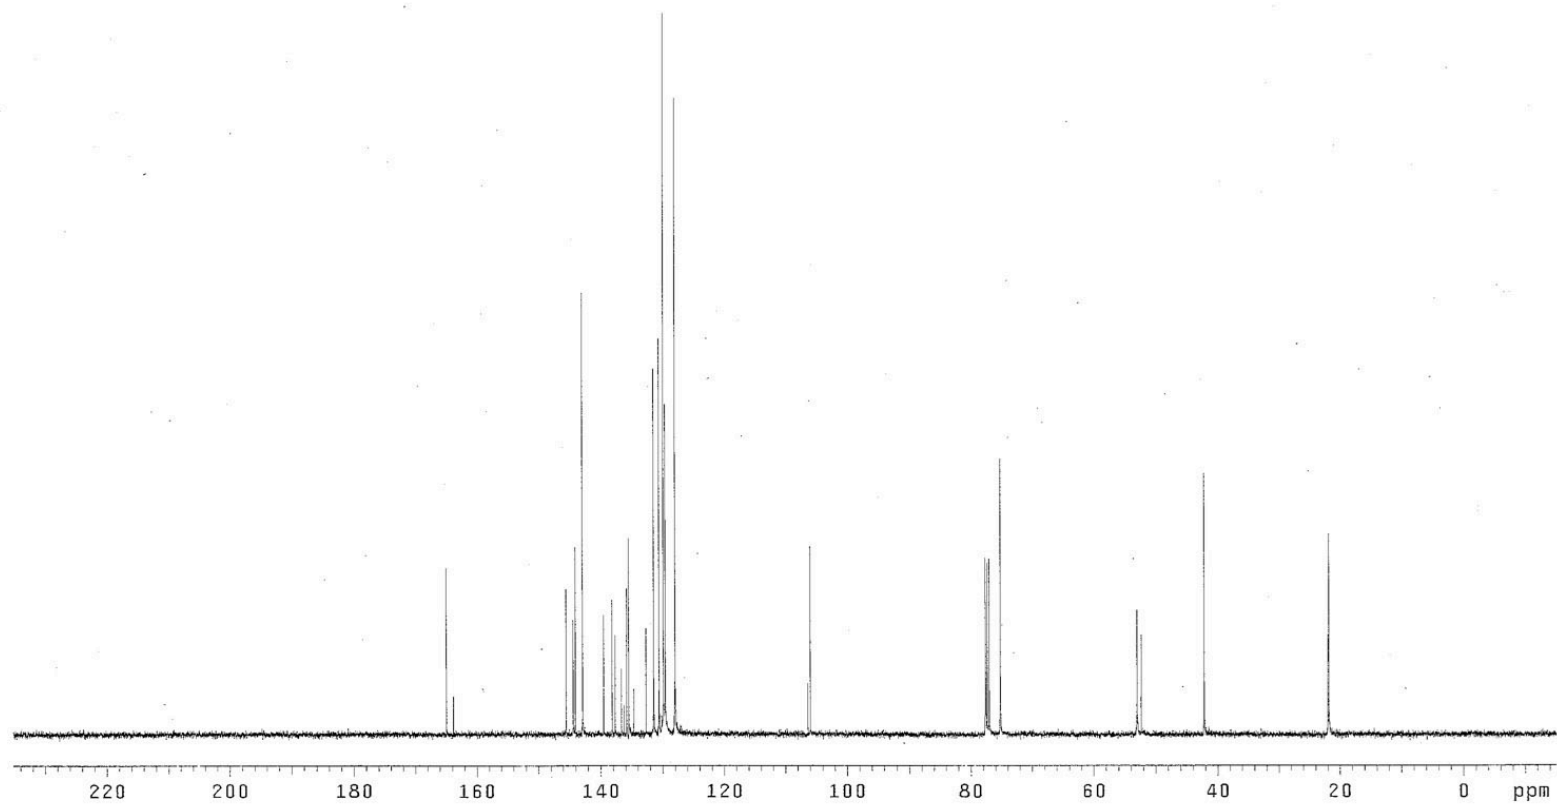

Pulse Sequence: s2pul  
Spectrometer: 399.79  
Solvent: CDCl<sub>3</sub>

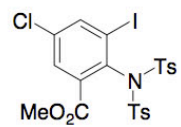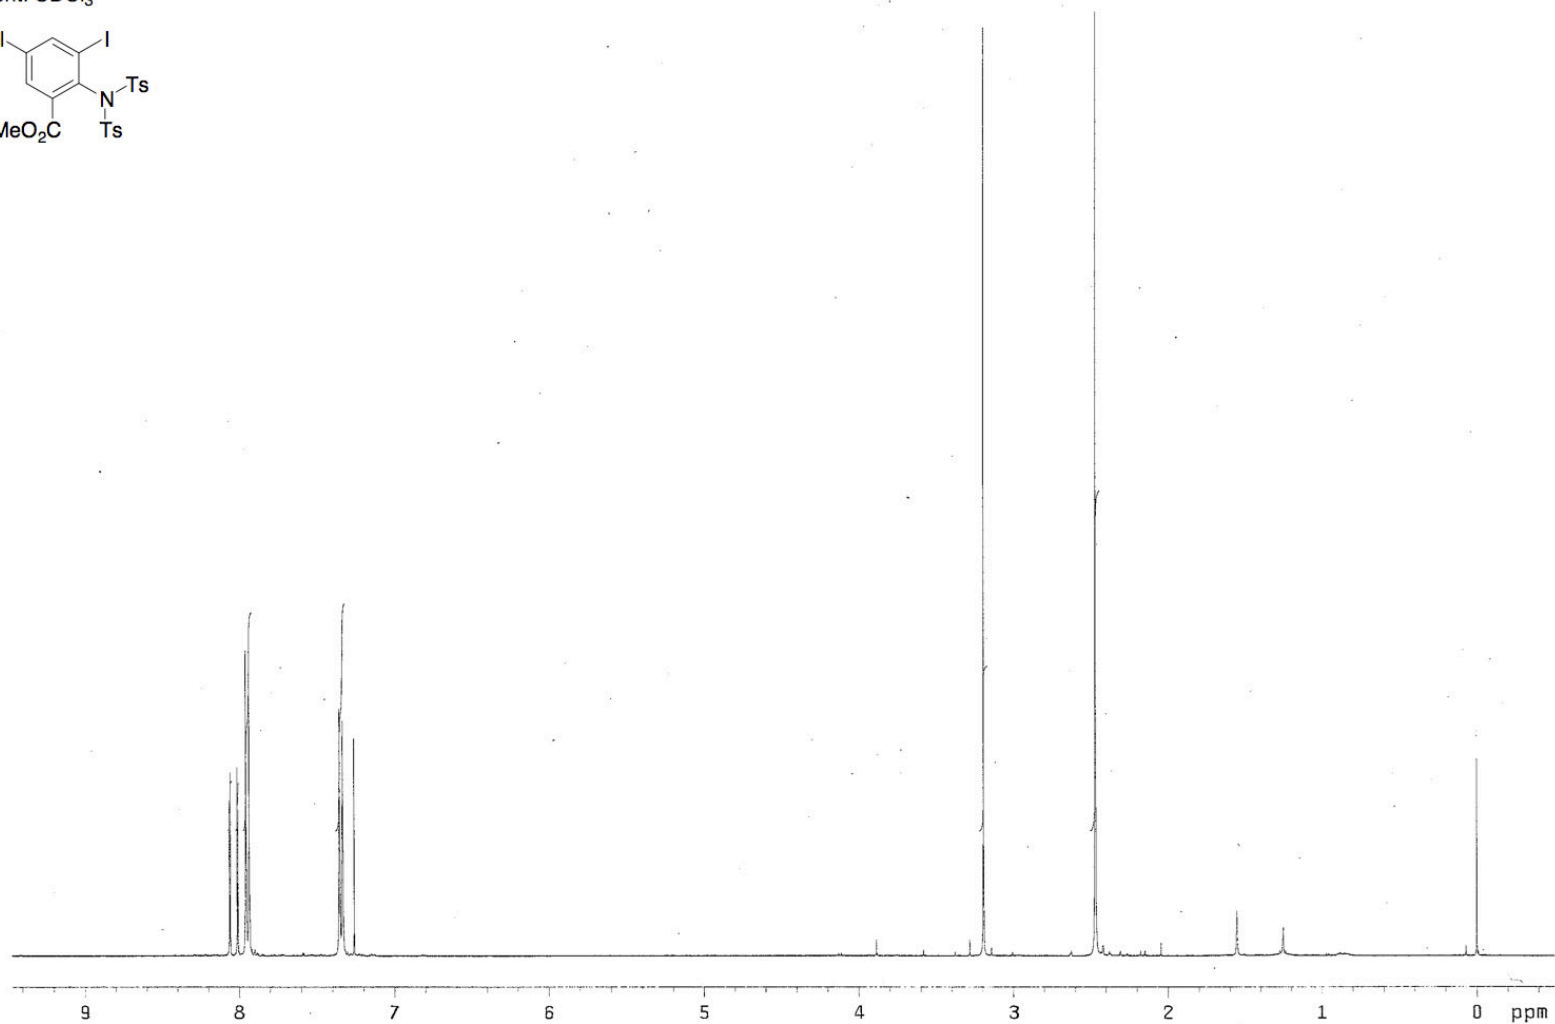

Pulse Sequence: s2pul  
Spectrometer: 399.79  
Solvent: CDCl<sub>3</sub>

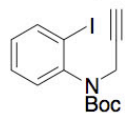

S2j

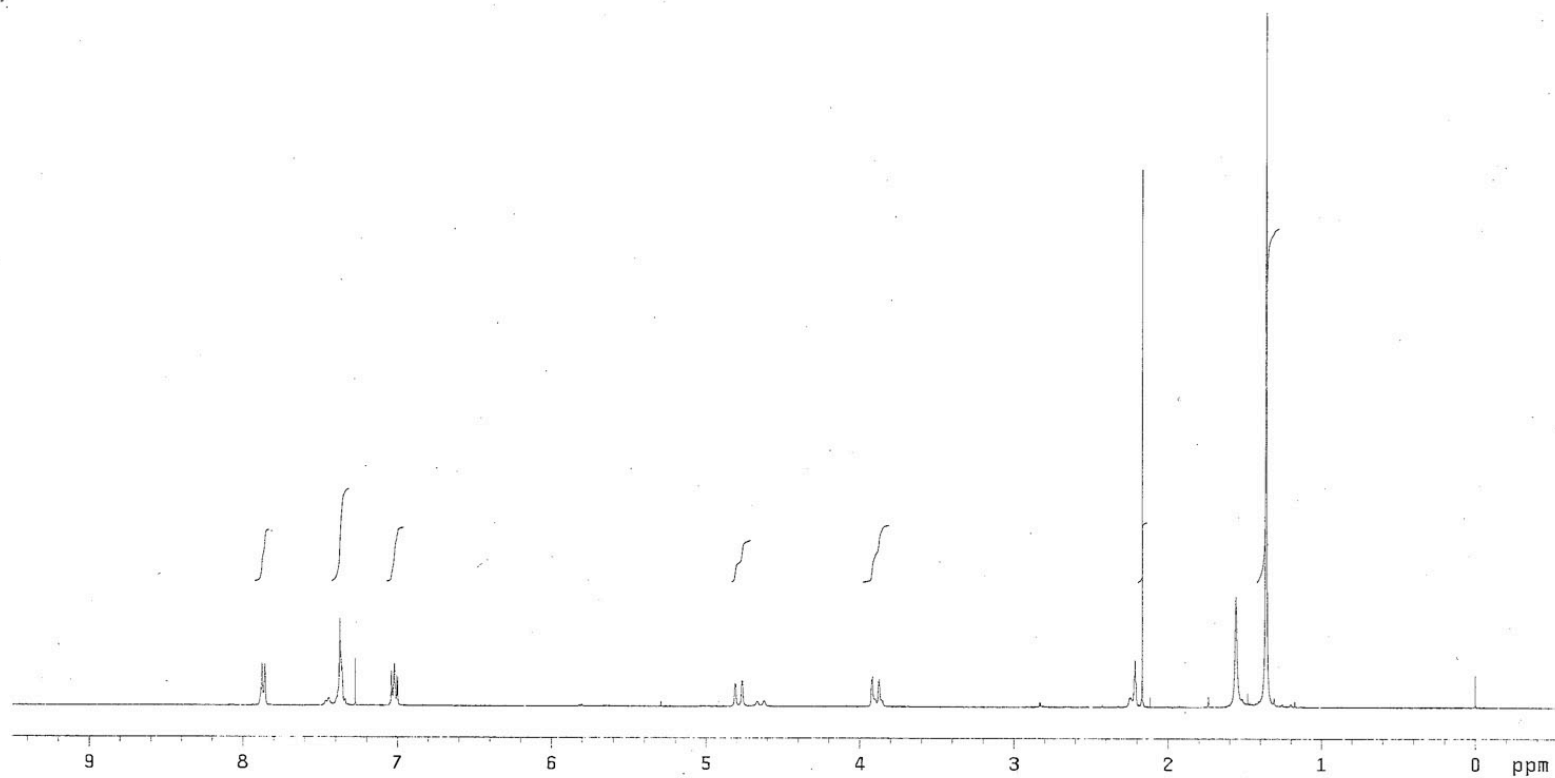

Pulse Sequence: s2pul  
Spectrometer: 100.53  
Solvent: CDCl<sub>3</sub>

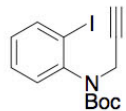

S2j

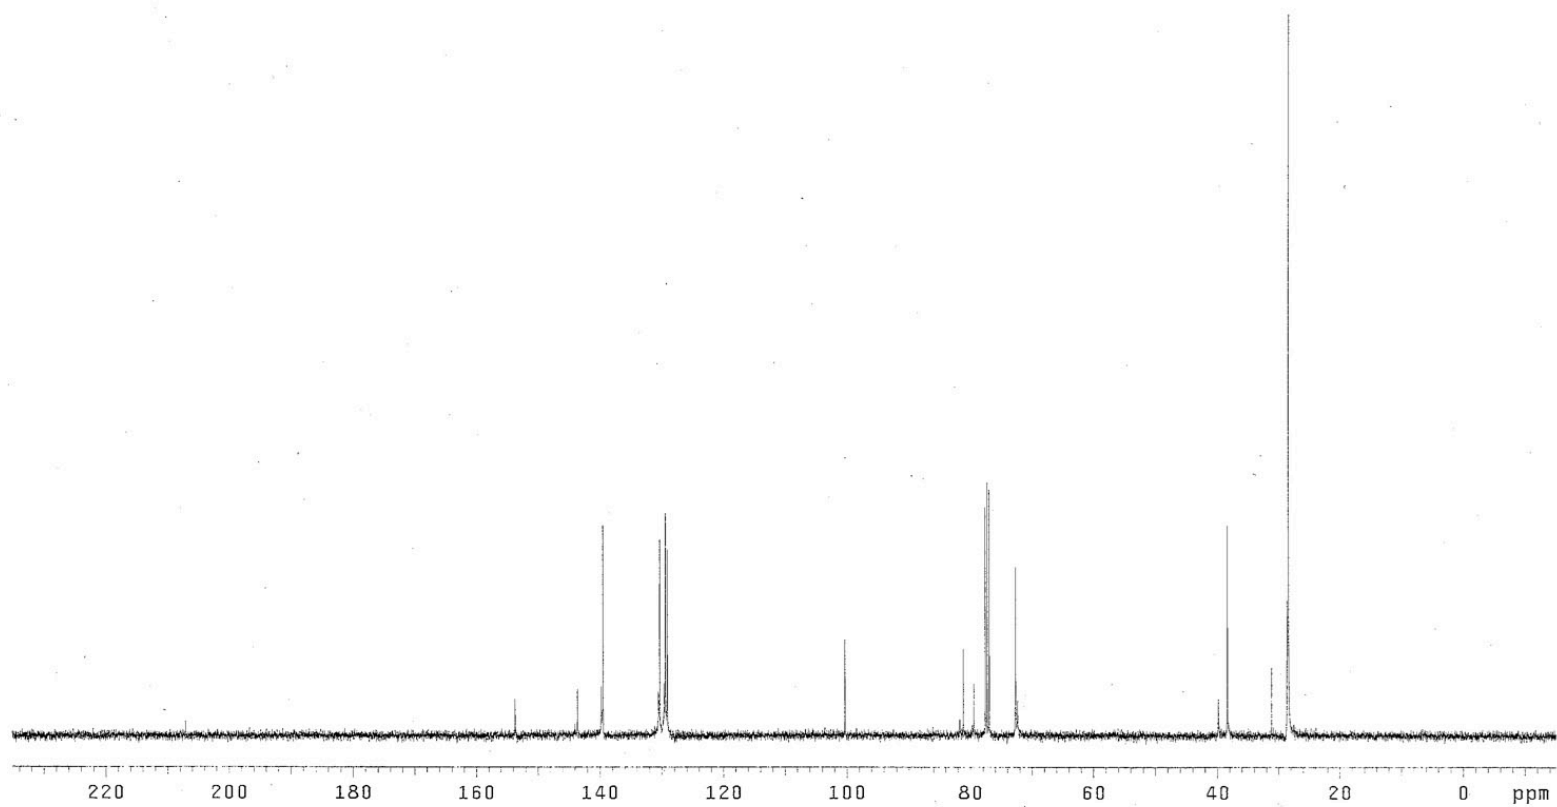

Pulse Sequence: s2pul  
Spectrometer: 399.79  
Solvent: CDCl<sub>3</sub>

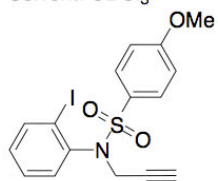

**S21**

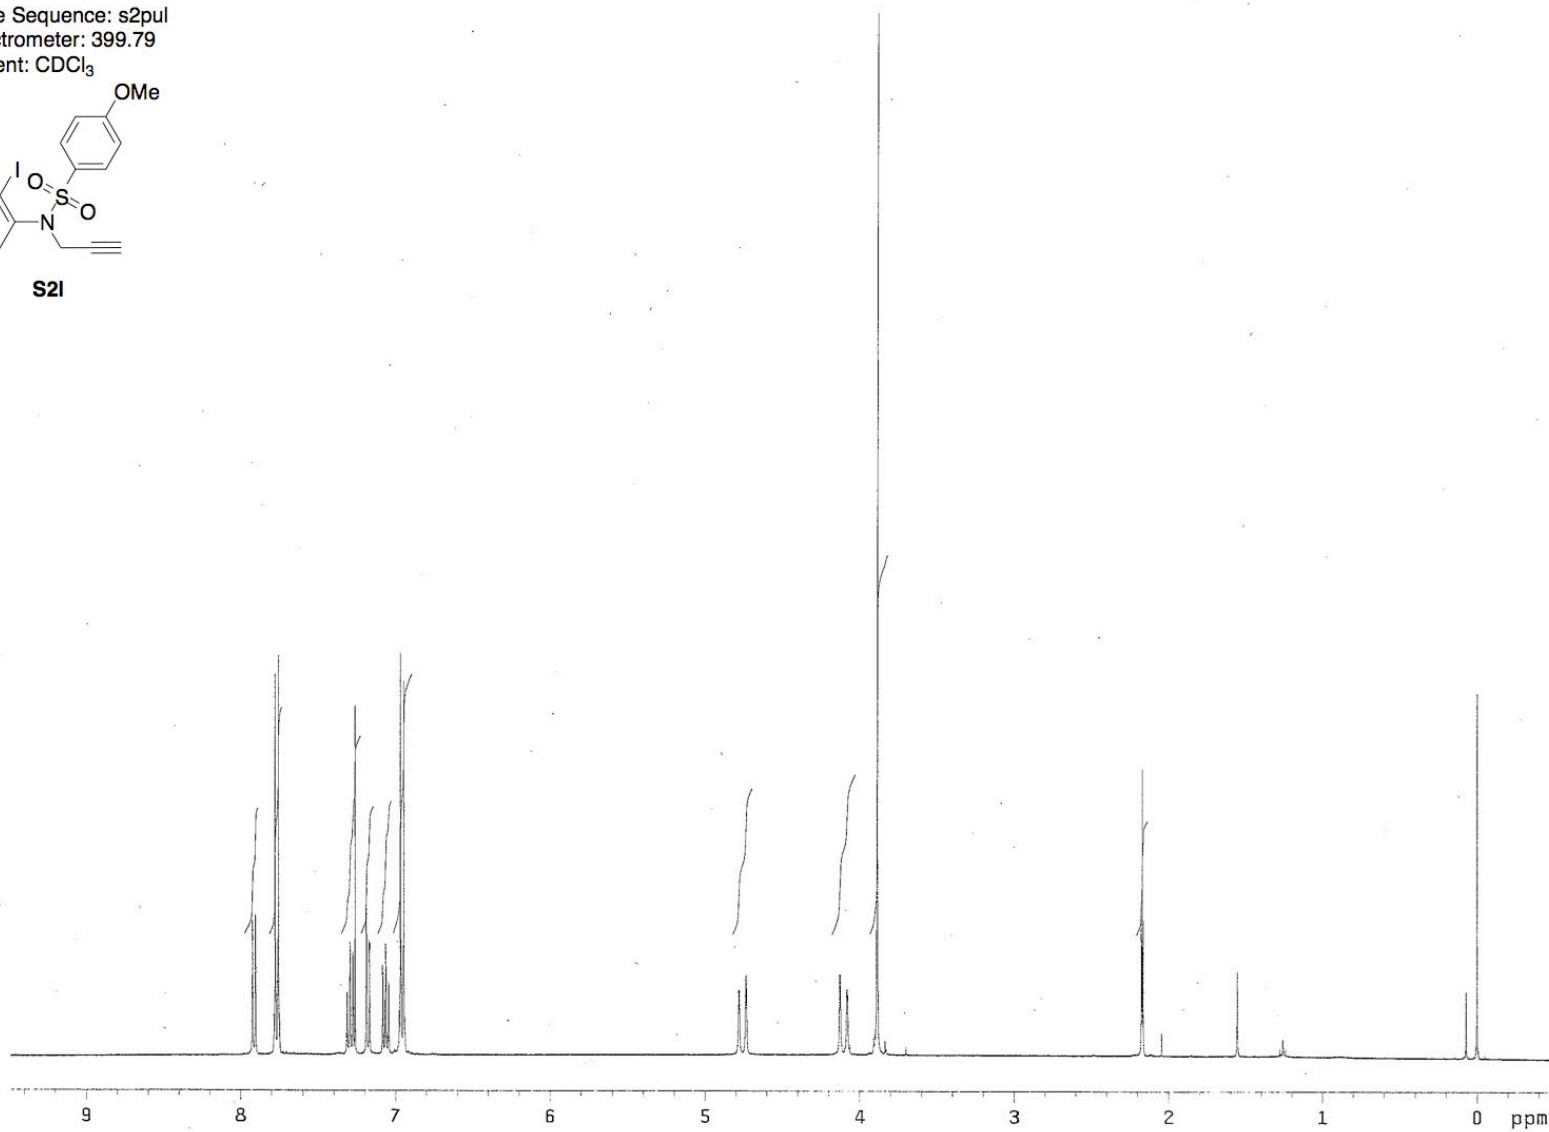

Pulse Sequence: s2pul  
Spectrometer: 100.53  
Solvent: CDCl<sub>3</sub>

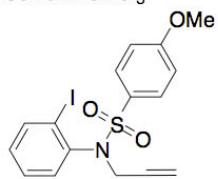

**S21**

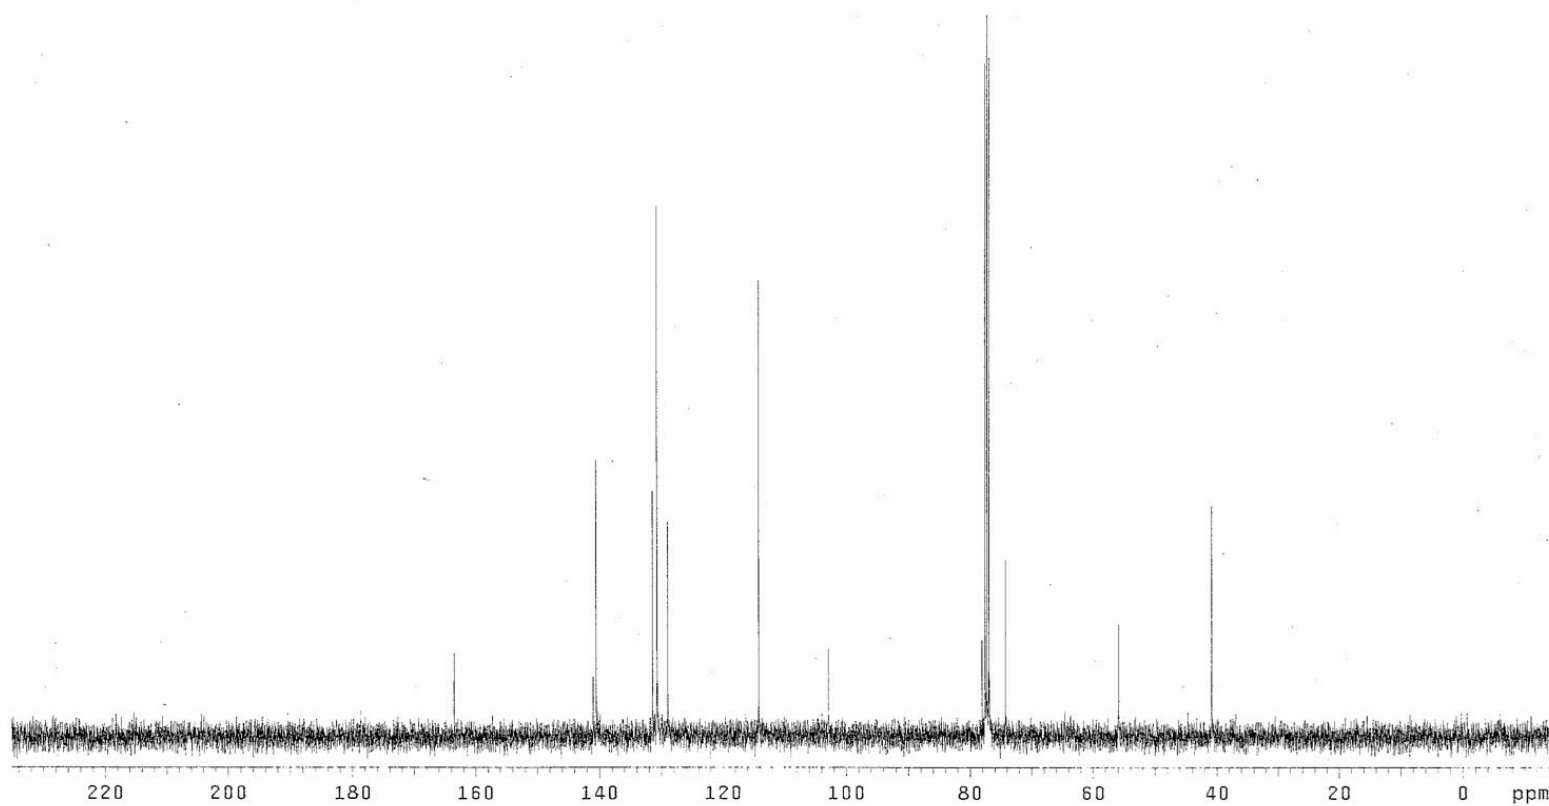



Pulse Sequence: s2pul  
Spectrometer: 399.79  
Solvent: CDCl<sub>3</sub>

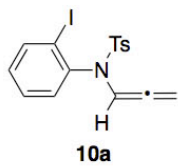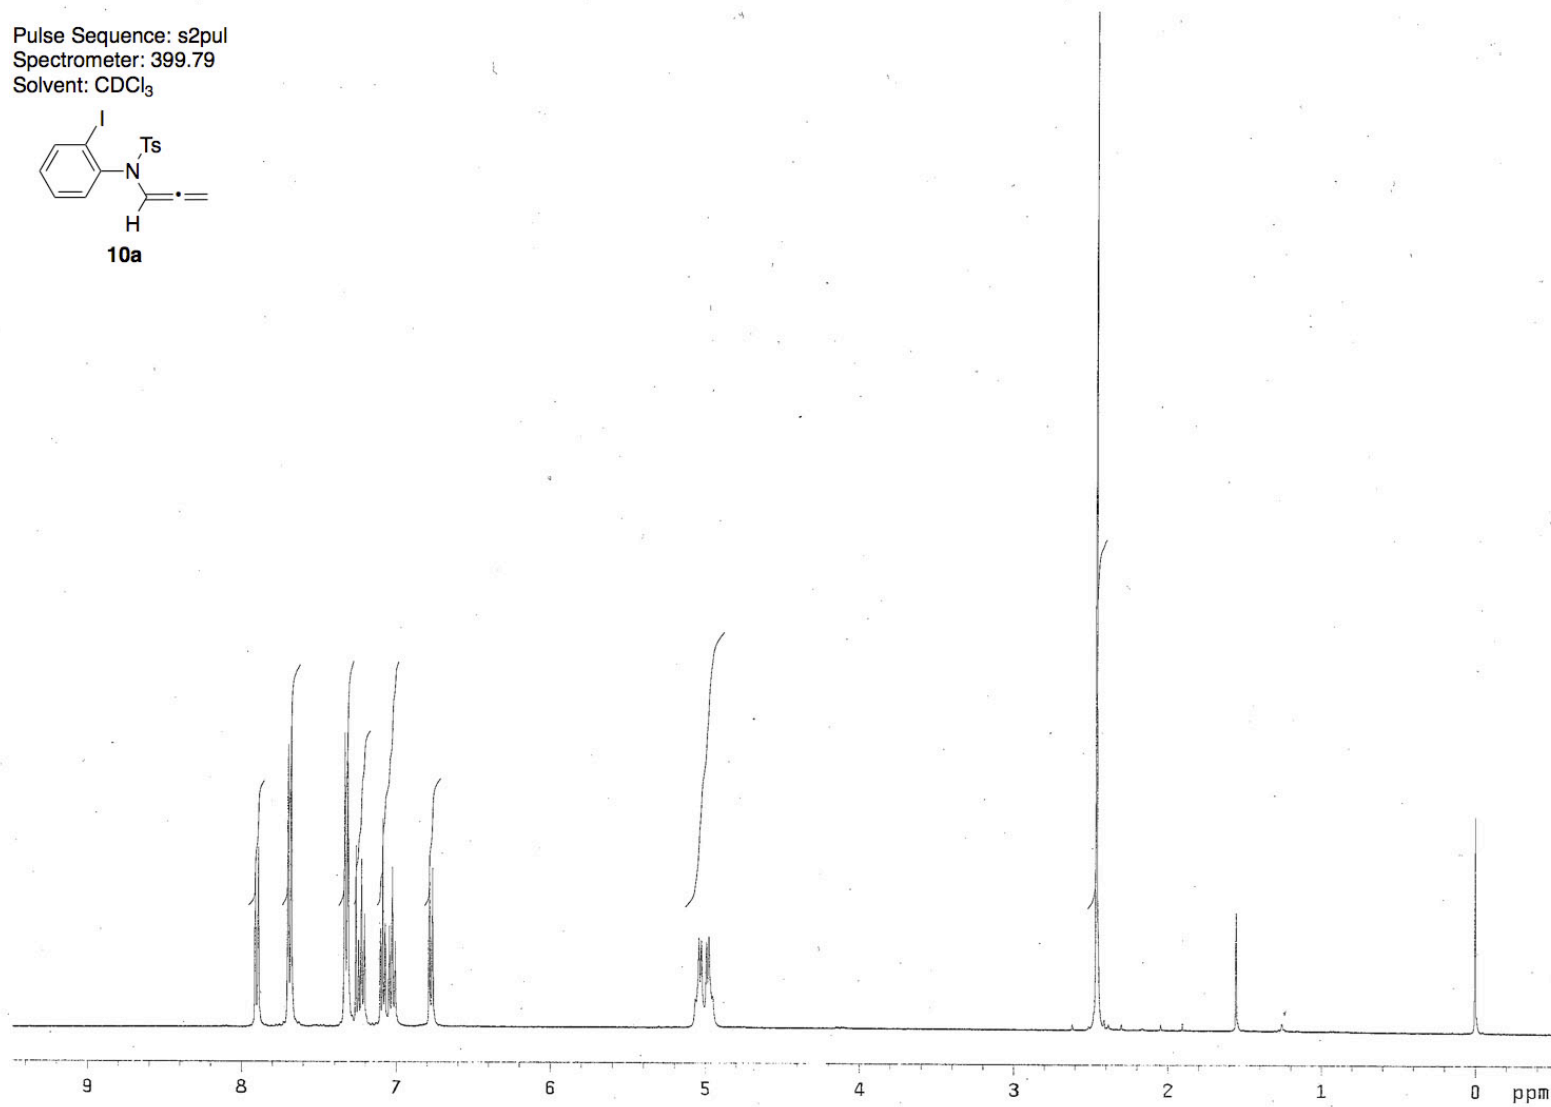

Pulse Sequence: s2pul  
Spectrometer: 100.53  
Solvent: CDCl<sub>3</sub>

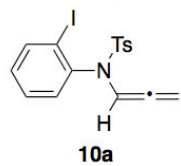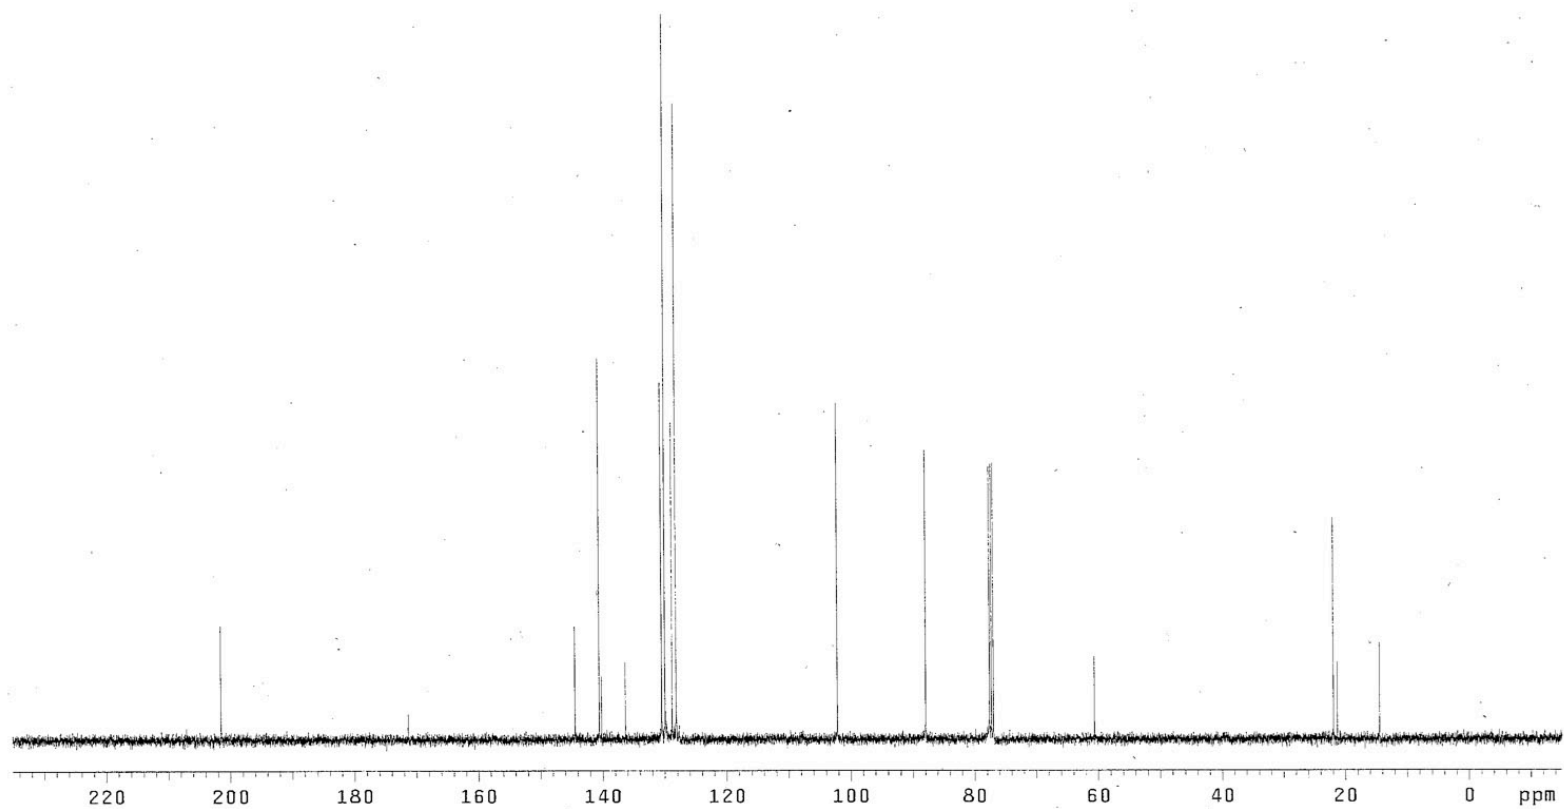

Pulse Sequence: s2pul  
Spectrometer: 399.79  
Solvent: CDCl<sub>3</sub>

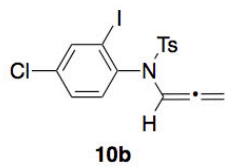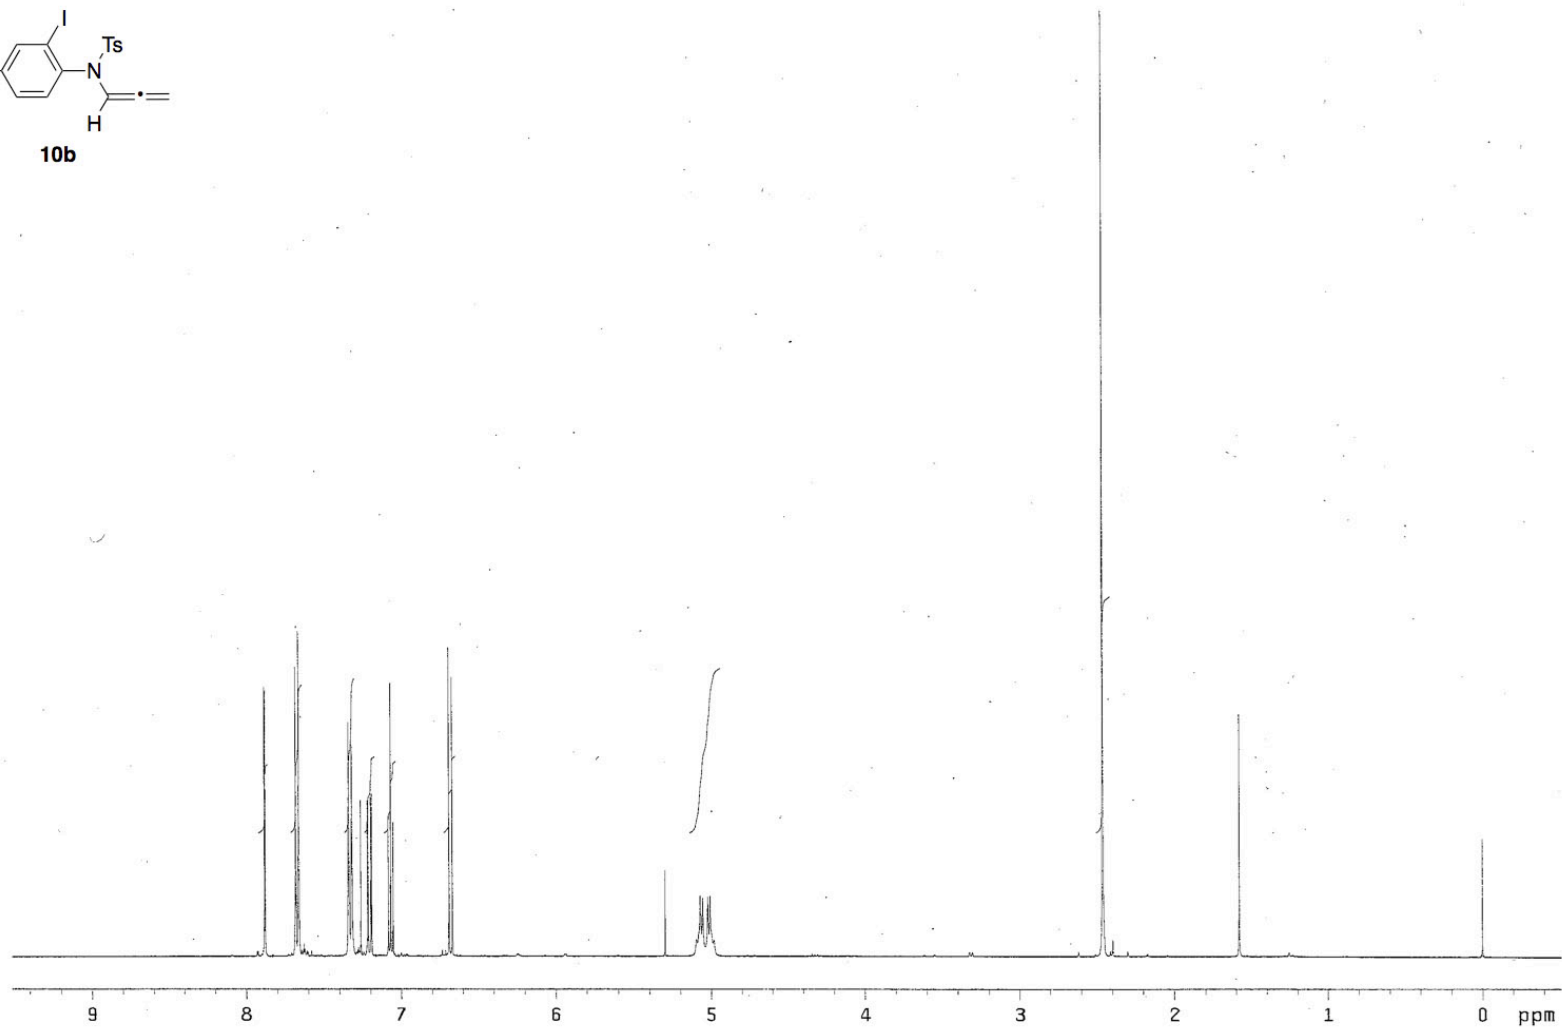

Pulse Sequence: s2pul  
Spectrometer: 100.53  
Solvent: CDCl<sub>3</sub>

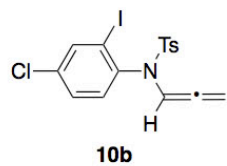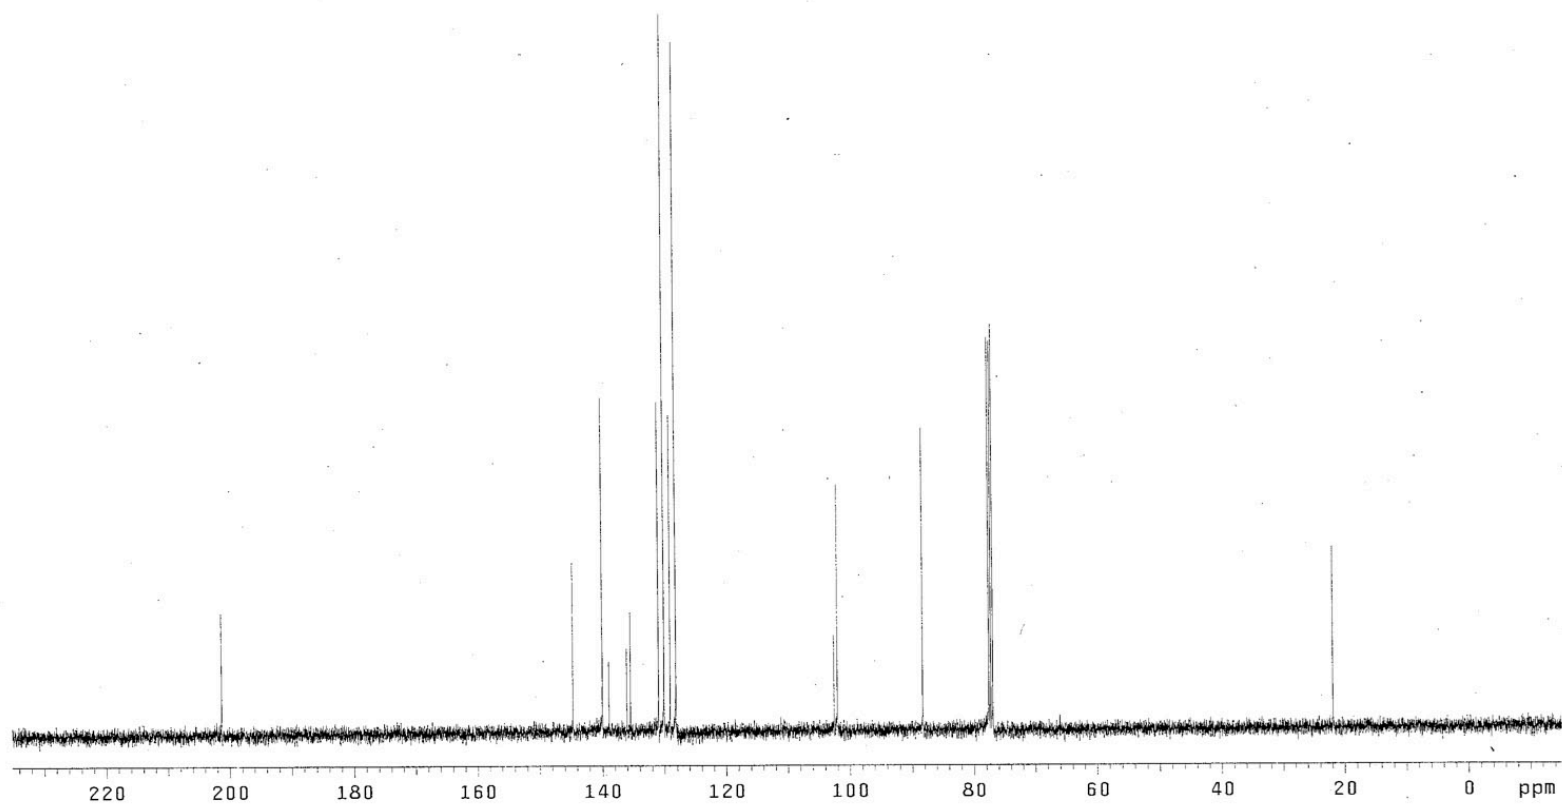

Pulse Sequence: s2pul  
Spectrometer: 399.79  
Solvent: CDCl<sub>3</sub>

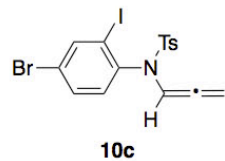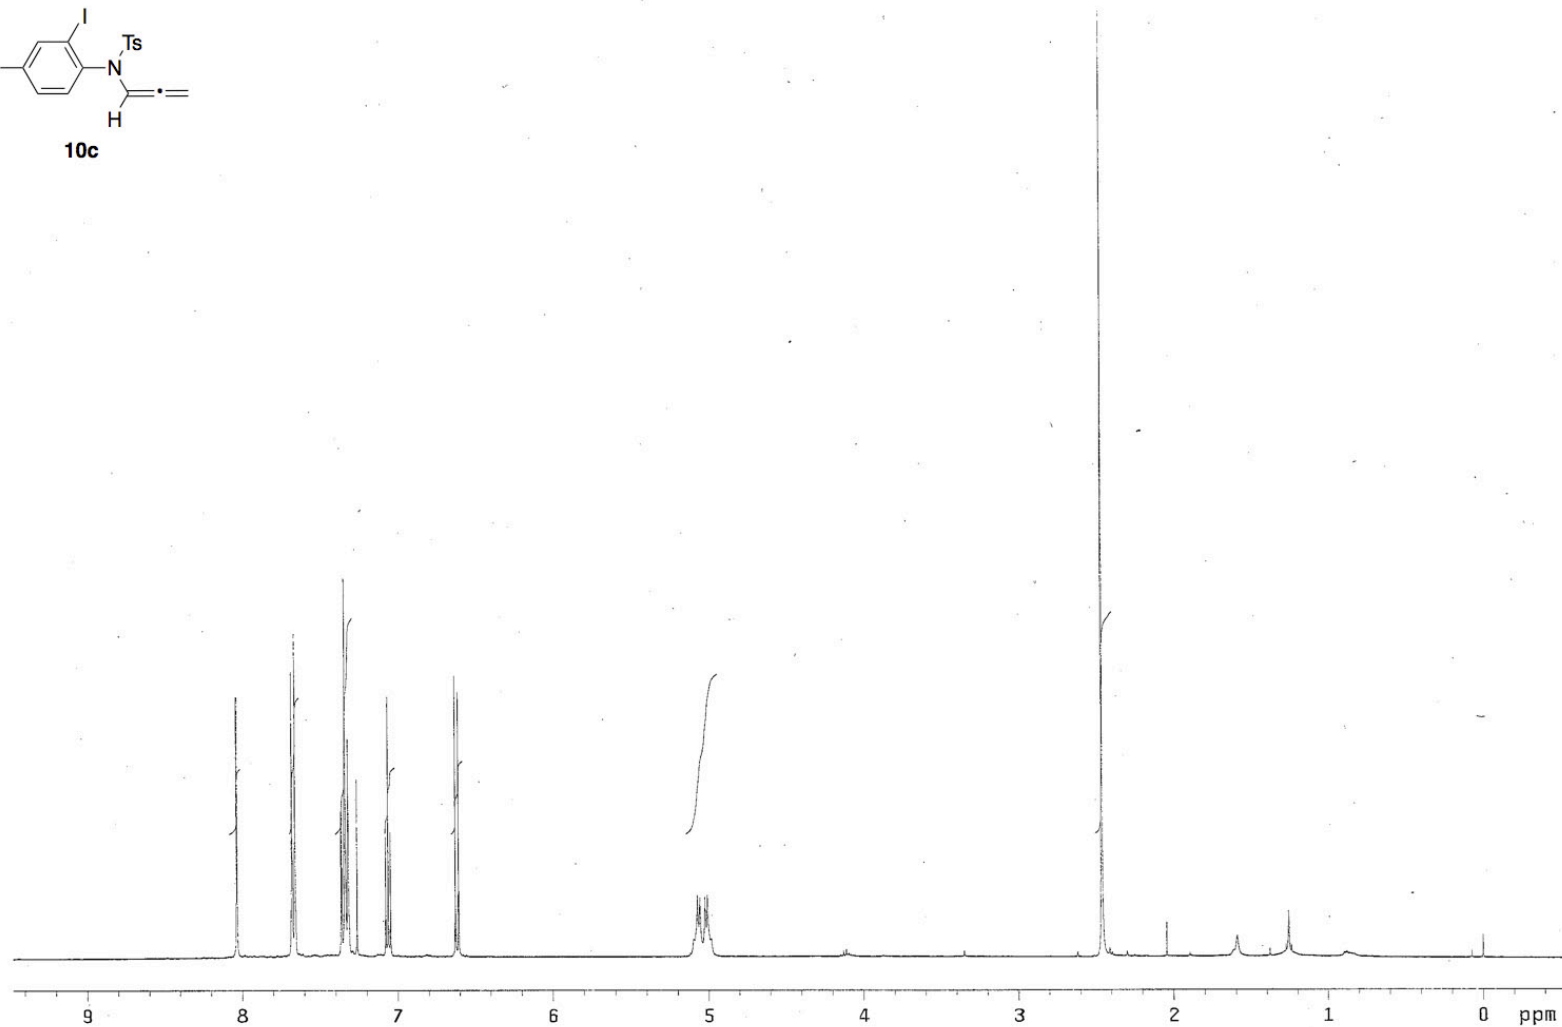

Pulse Sequence: s2pul  
Spectrometer: 100.53  
Solvent: CDCl<sub>3</sub>

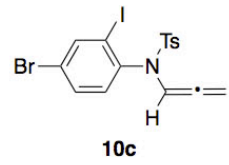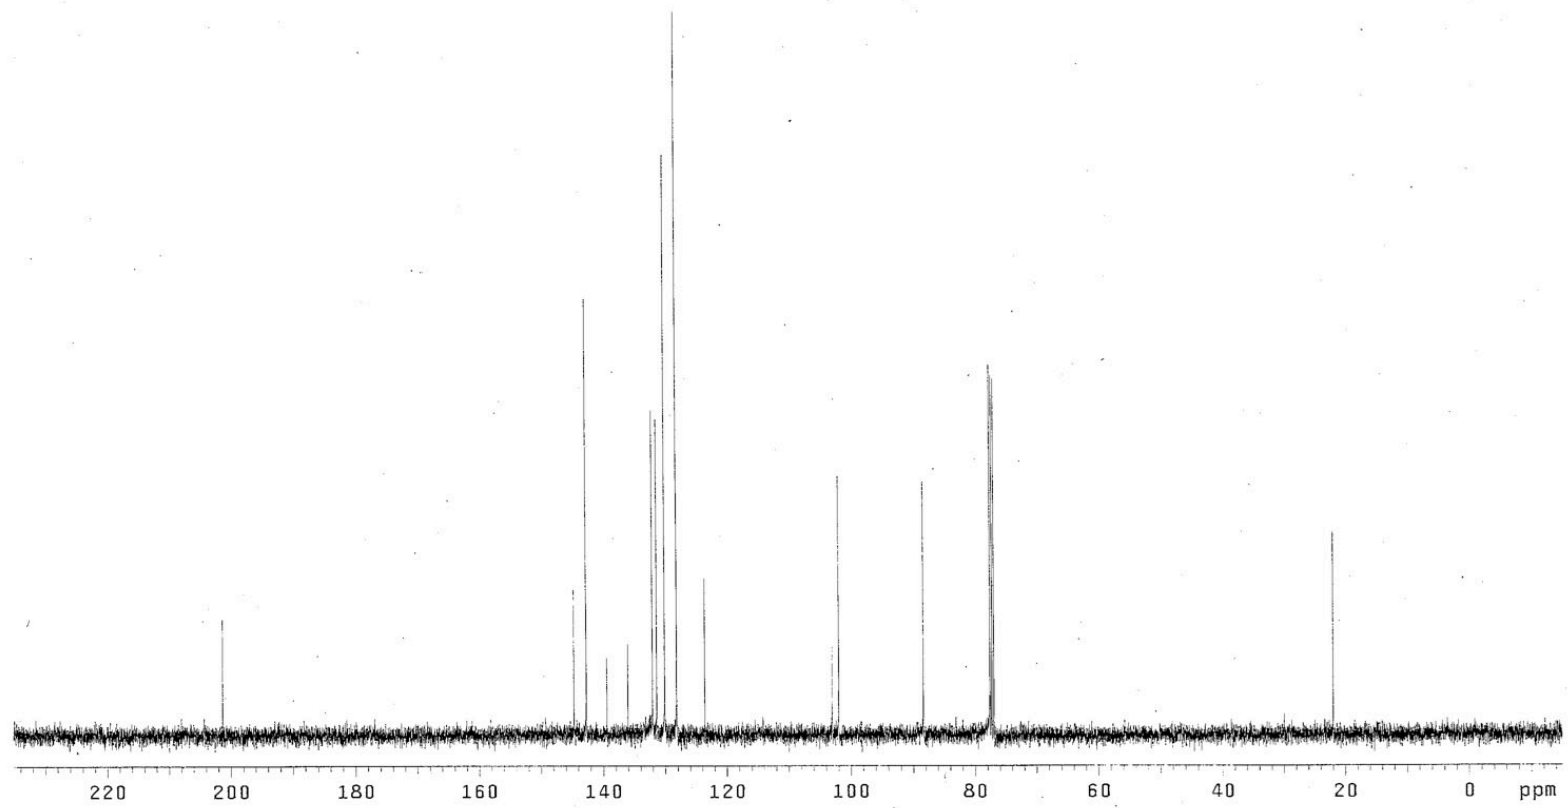

Pulse Sequence: s2pul  
Spectrometer: 399.79  
Solvent: CDCl<sub>3</sub>

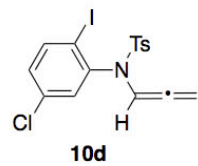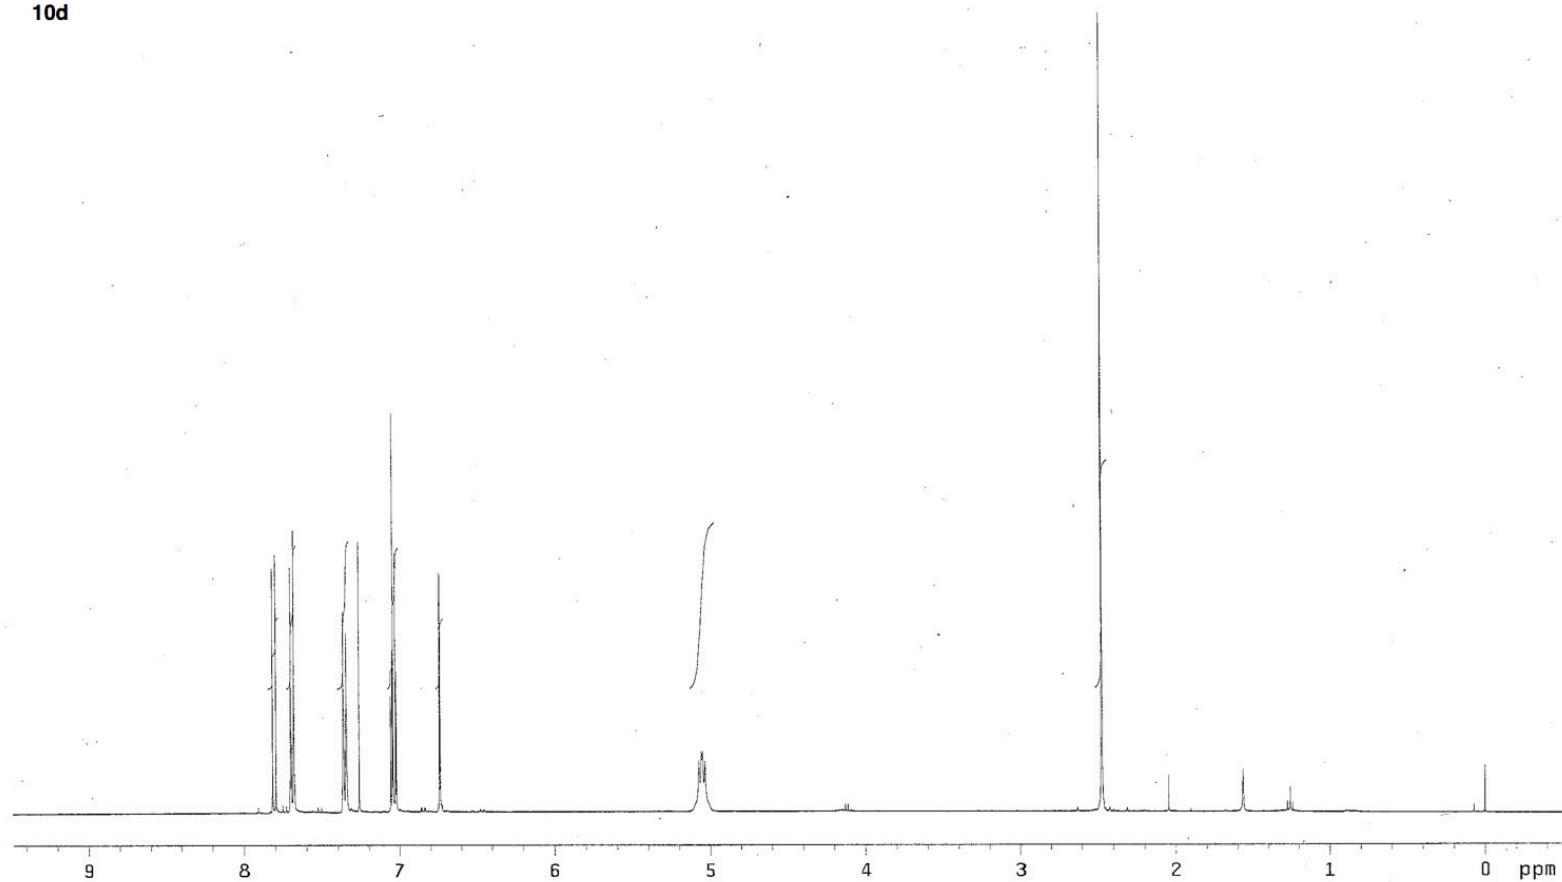

Pulse Sequence: s2pul  
Spectrometer: 100.53  
Solvent: CDCl<sub>3</sub>

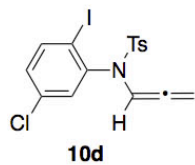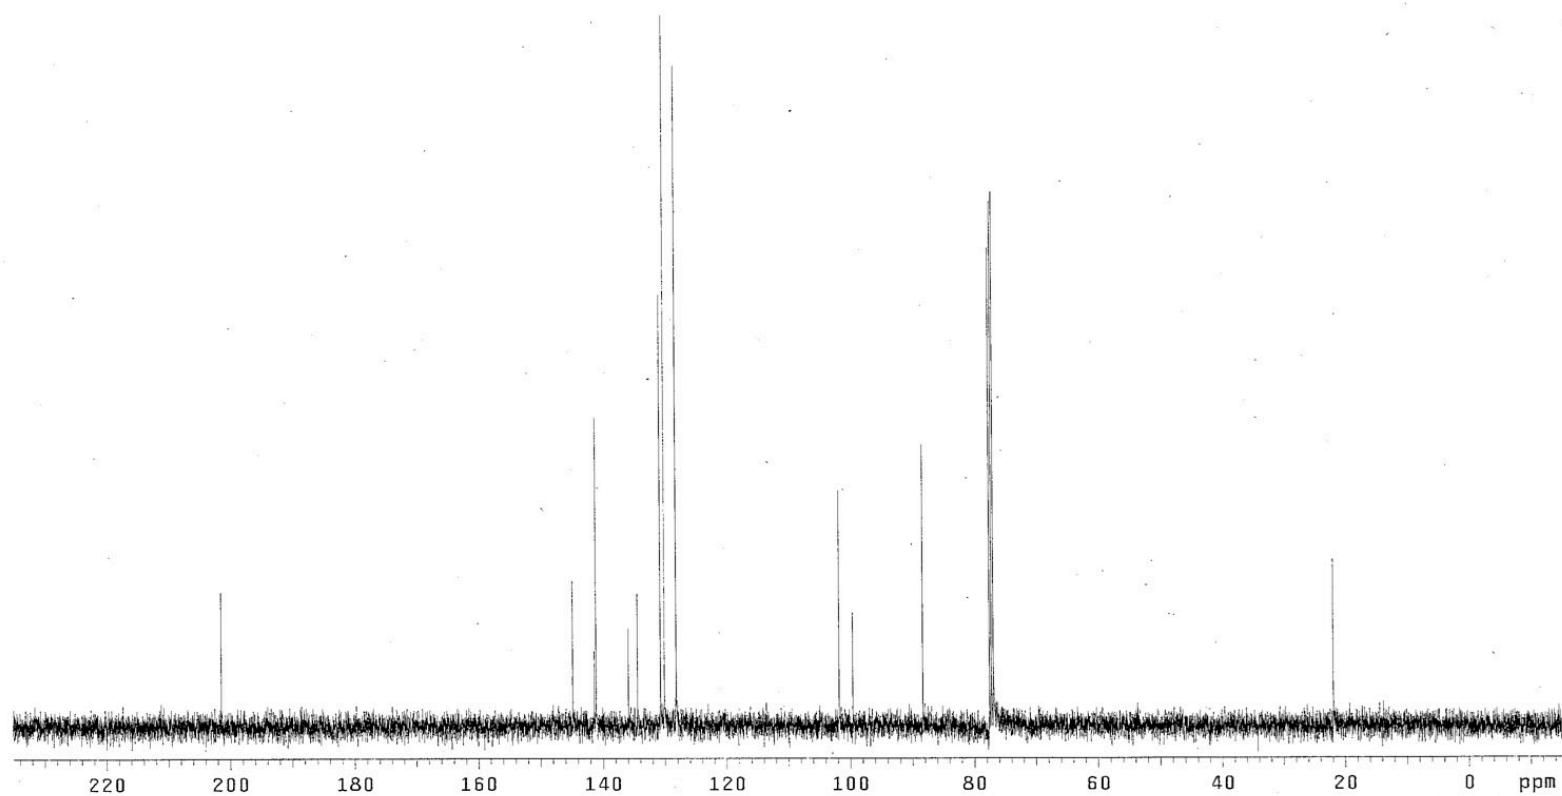



Pulse Sequence: s2pul  
Spectrometer: 399.79  
Solvent: CDCl<sub>3</sub>

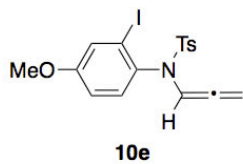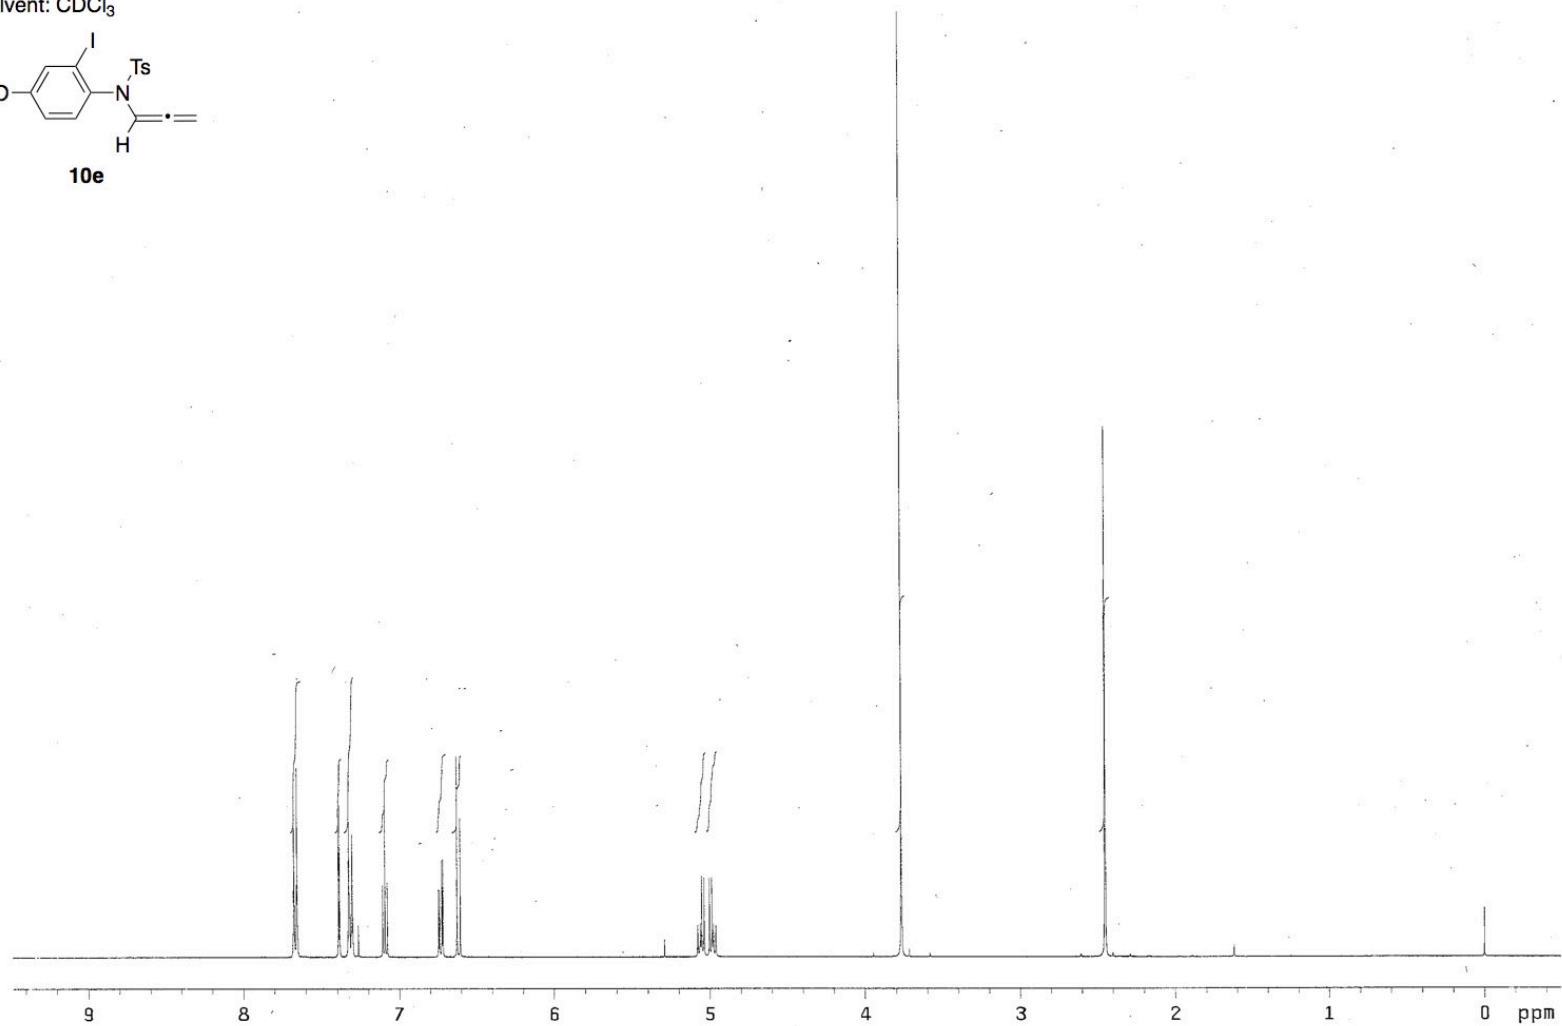

Pulse Sequence: s2pul  
Spectrometer: 100.53  
Solvent: CDCl<sub>3</sub>

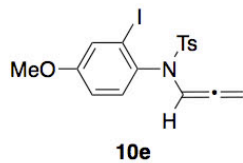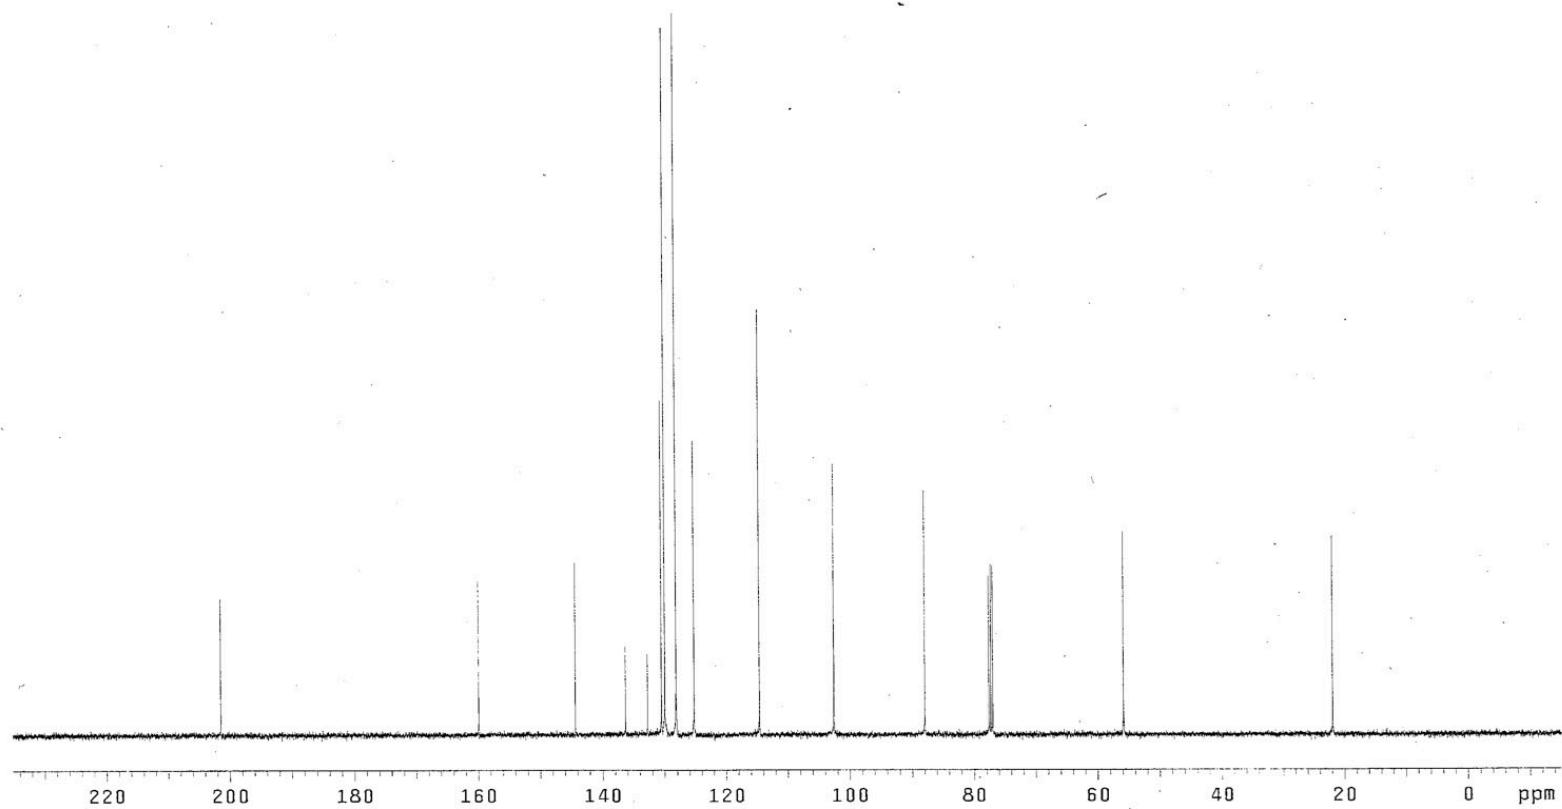

Pulse Sequence: s2pul  
Spectrometer: 399.79  
Solvent: CDCl<sub>3</sub>

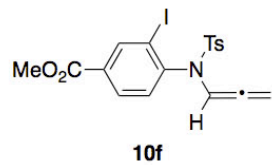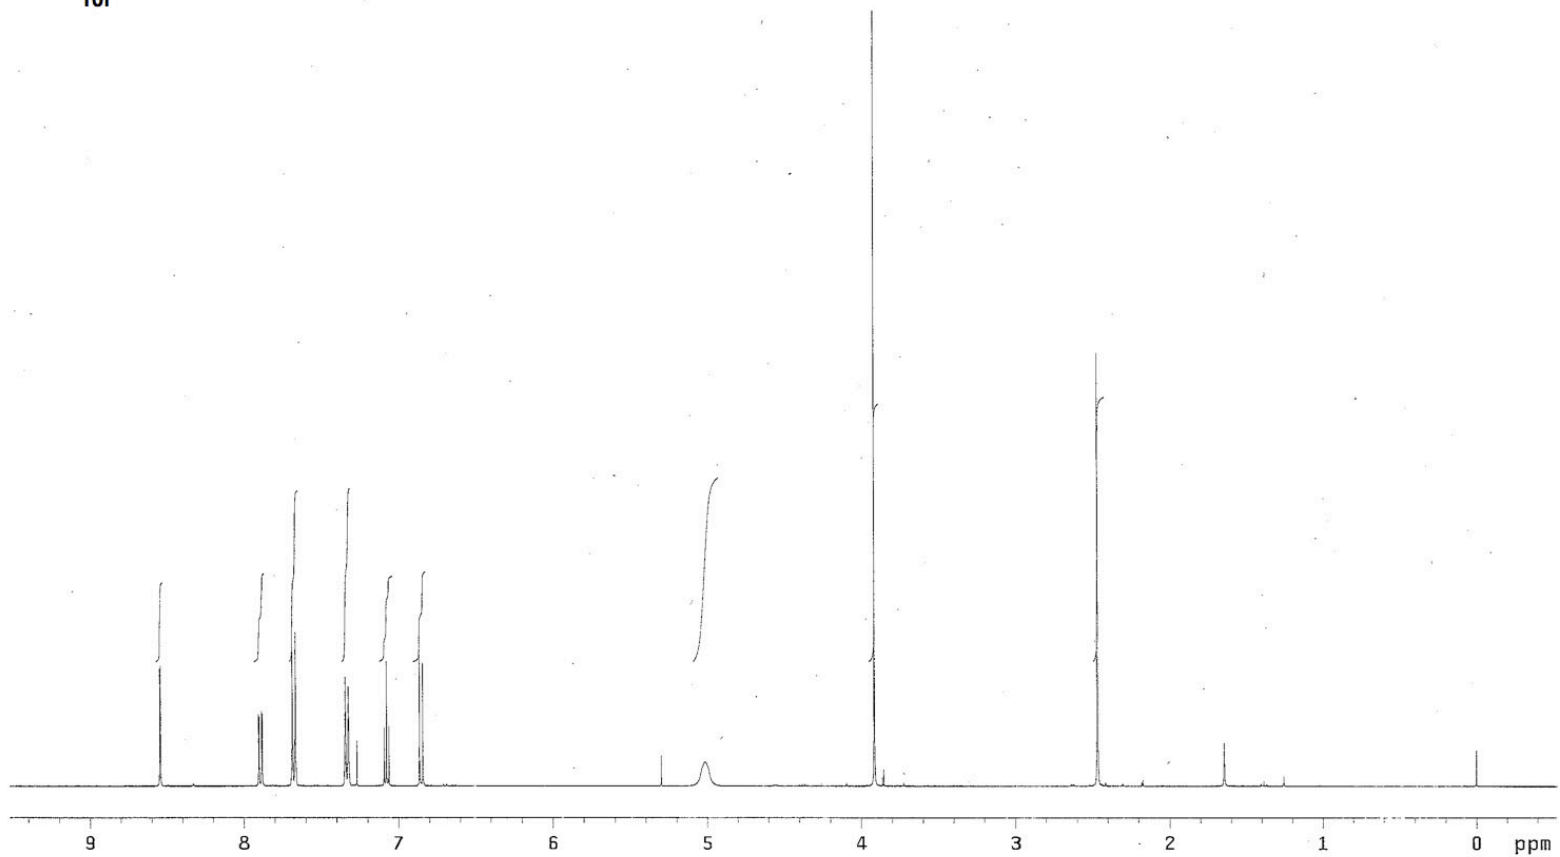

Pulse Sequence: s2pul  
Spectrometer: 100.53  
Solvent: CDCl<sub>3</sub>

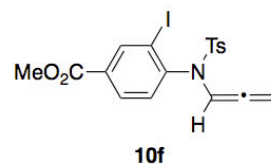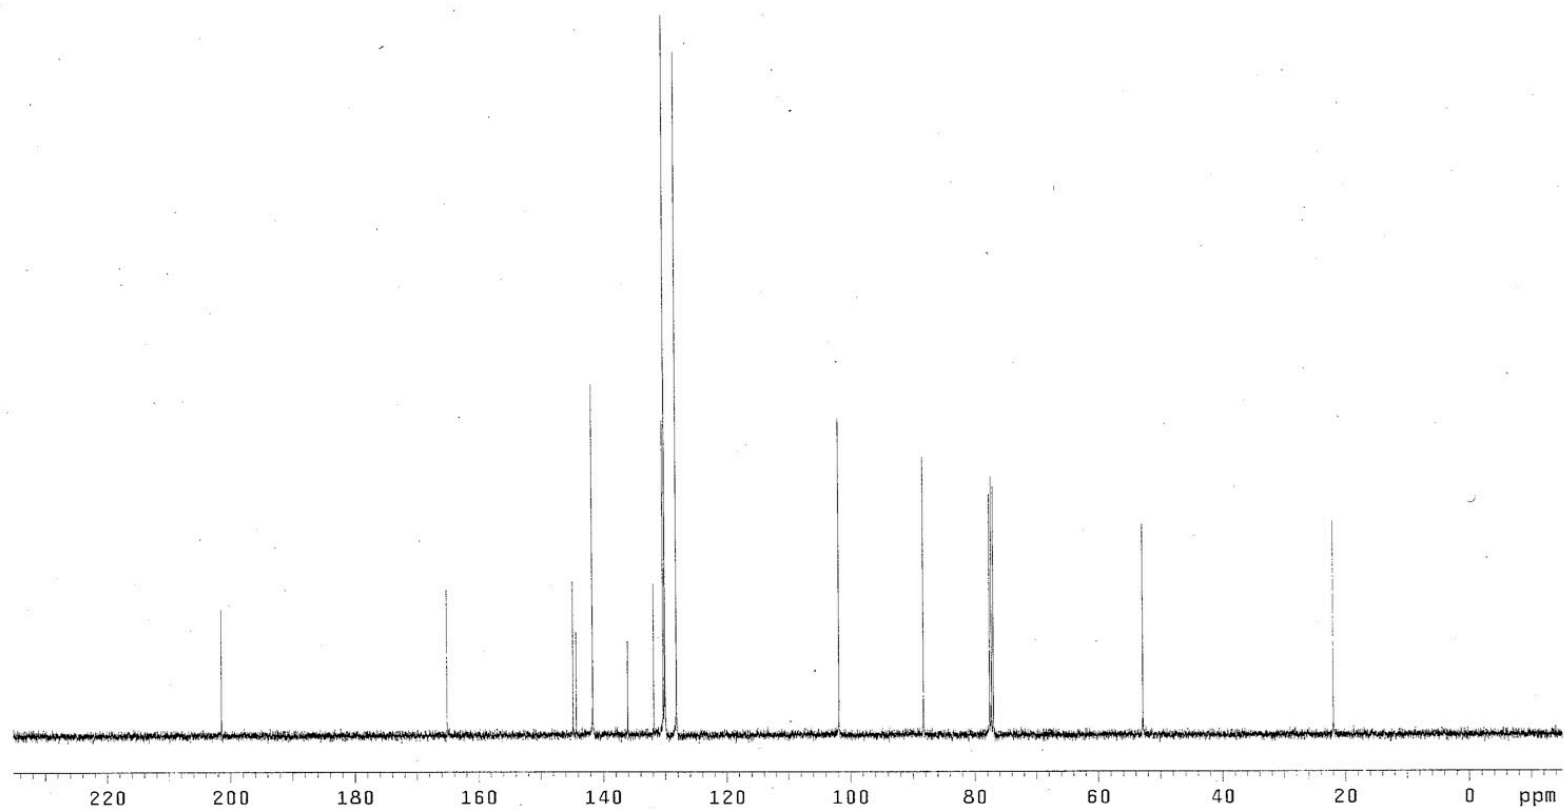

Pulse Sequence: s2pul  
Spectrometer: 399.79  
Solvent: CDCl<sub>3</sub>

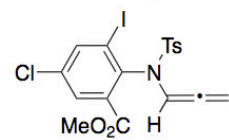

10g

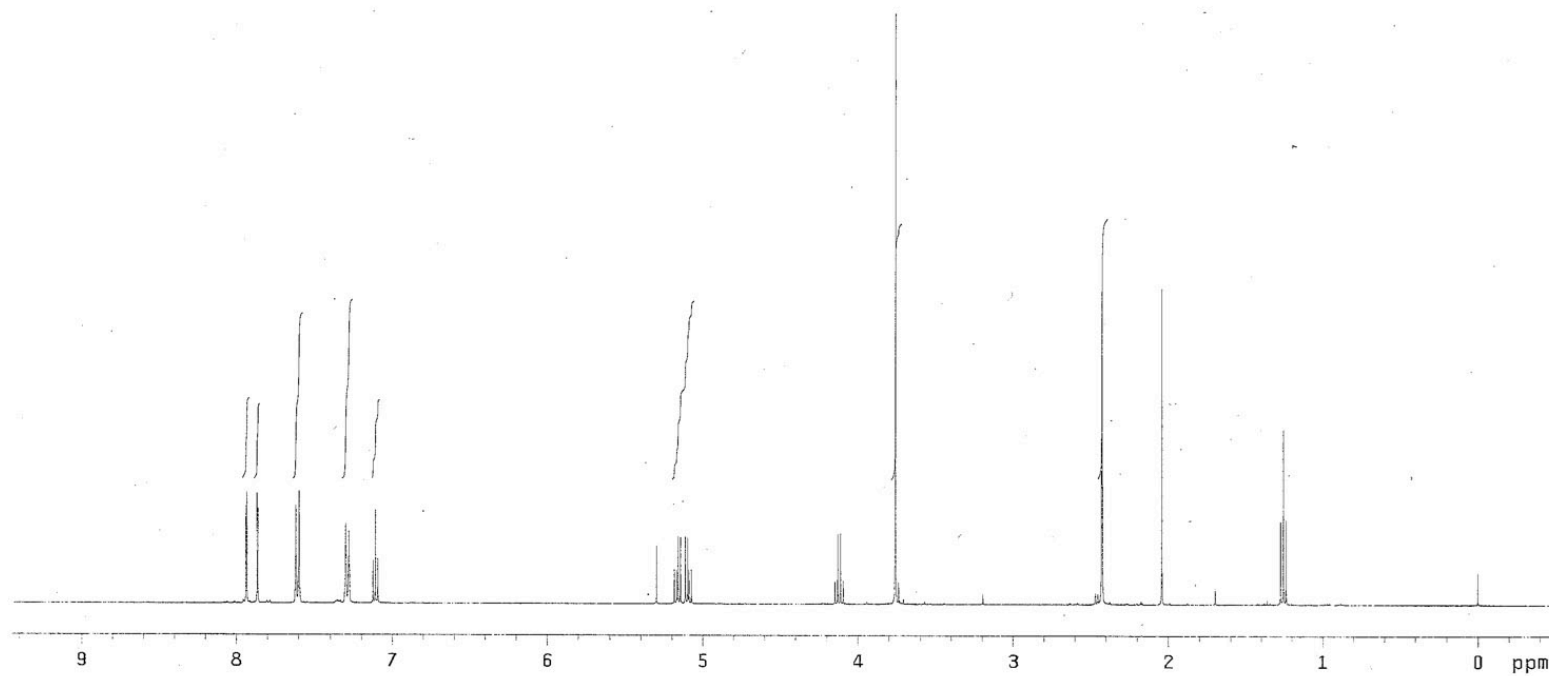

Pulse Sequence: s2pul  
Spectrometer: 100.53  
Solvent: CDCl<sub>3</sub>

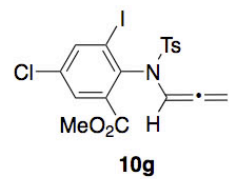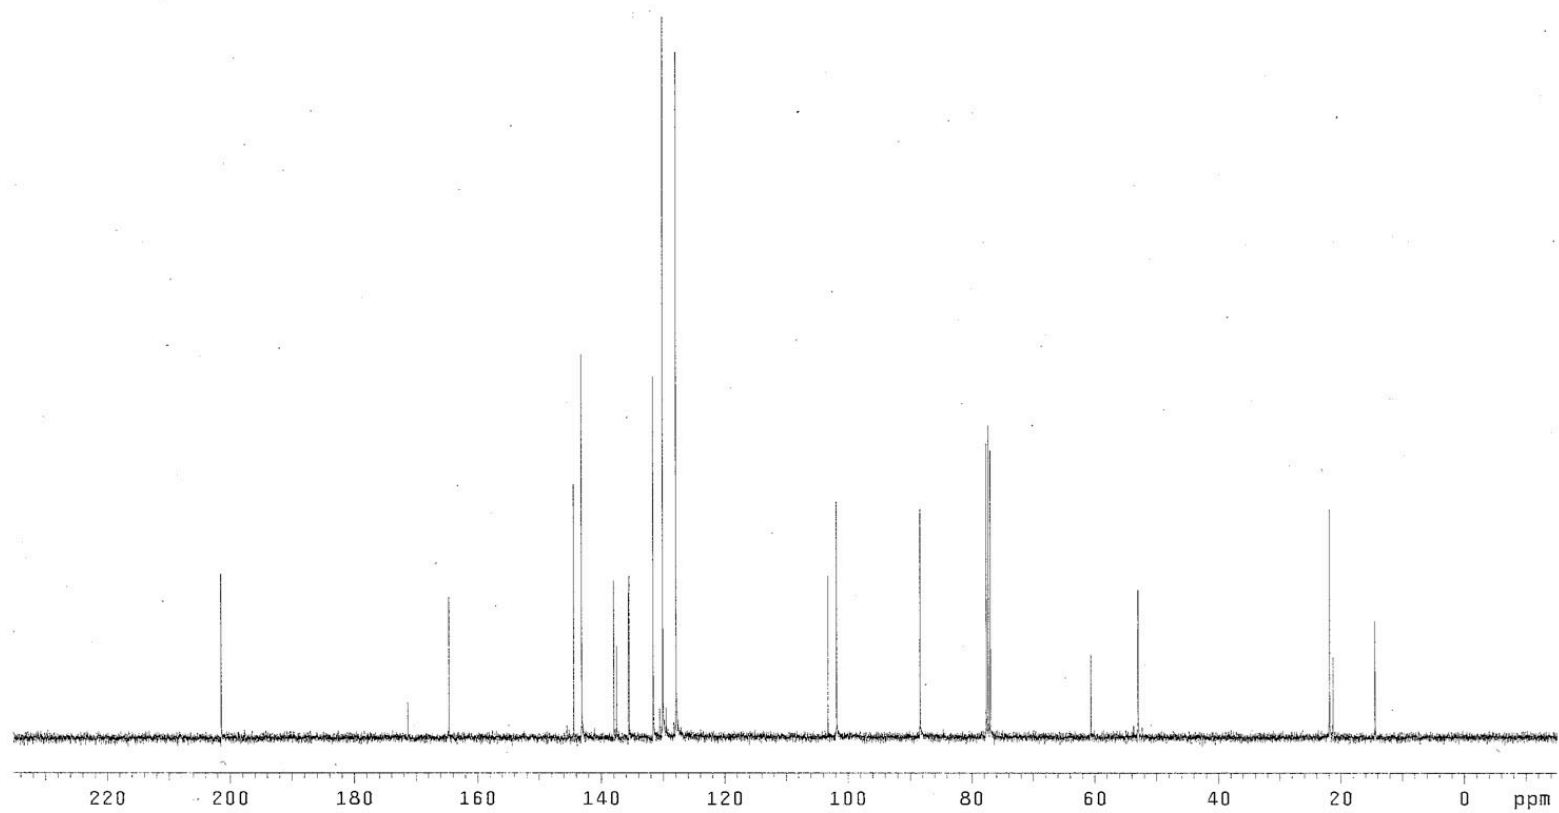

Pulse Sequence: s2pul  
Spectrometer: 399.79  
Solvent: CDCl<sub>3</sub>

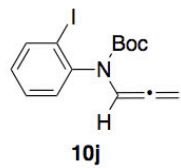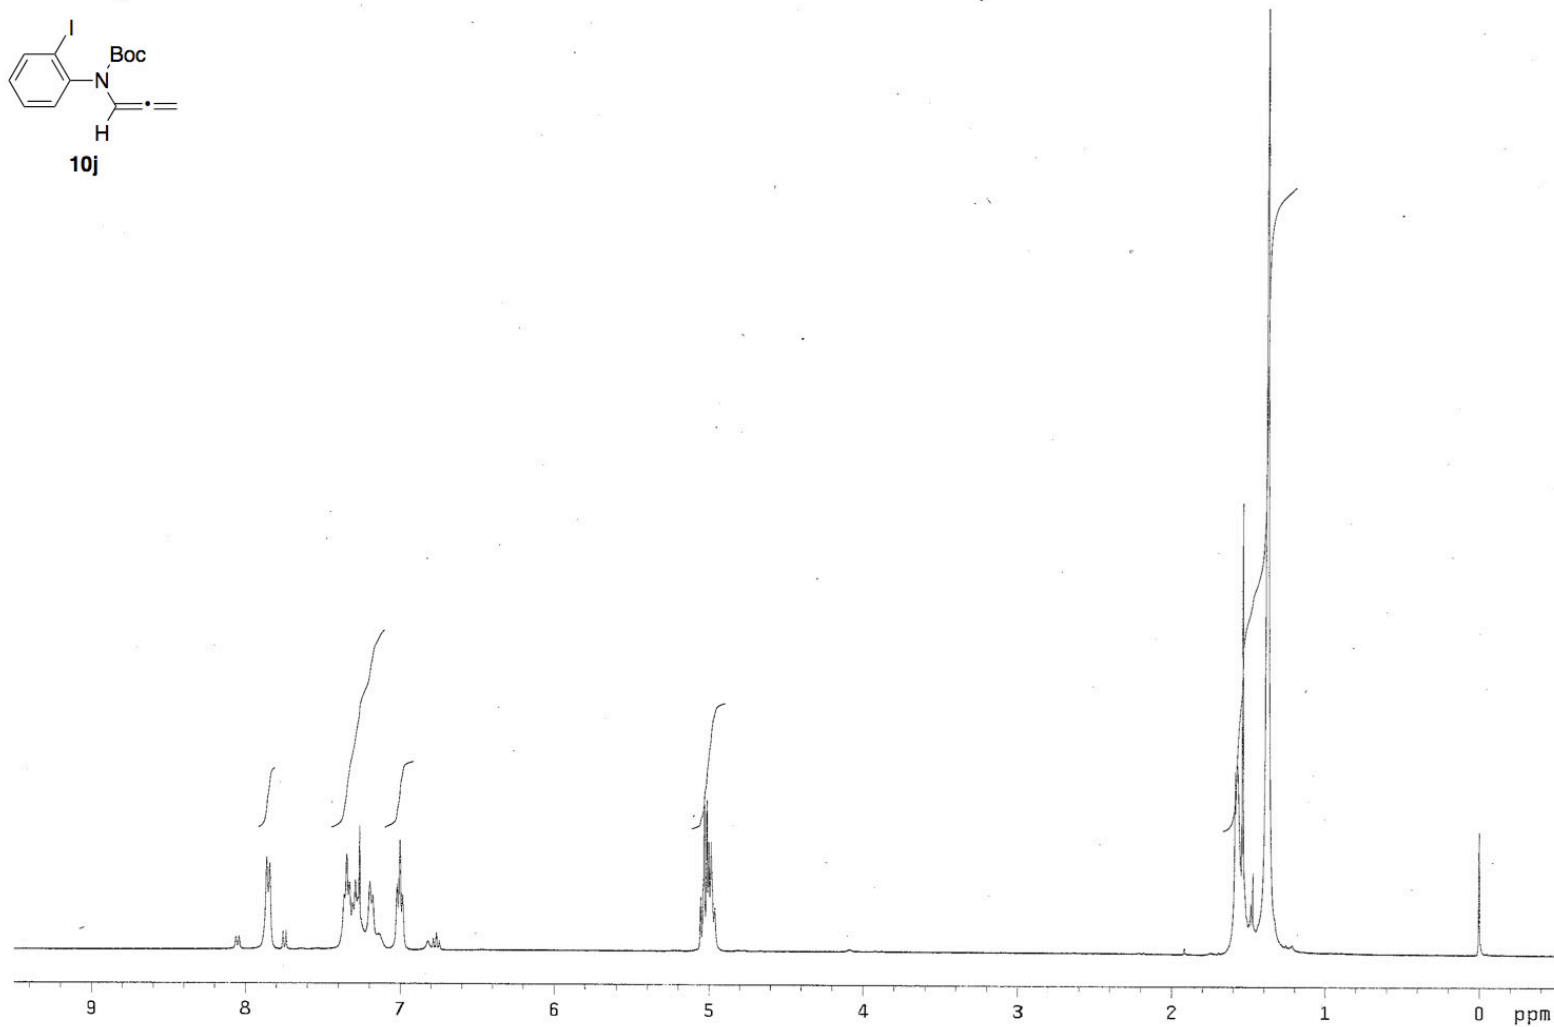

Pulse Sequence: s2pul  
Spectrometer: 100.53  
Solvent: CDCl<sub>3</sub>

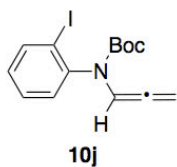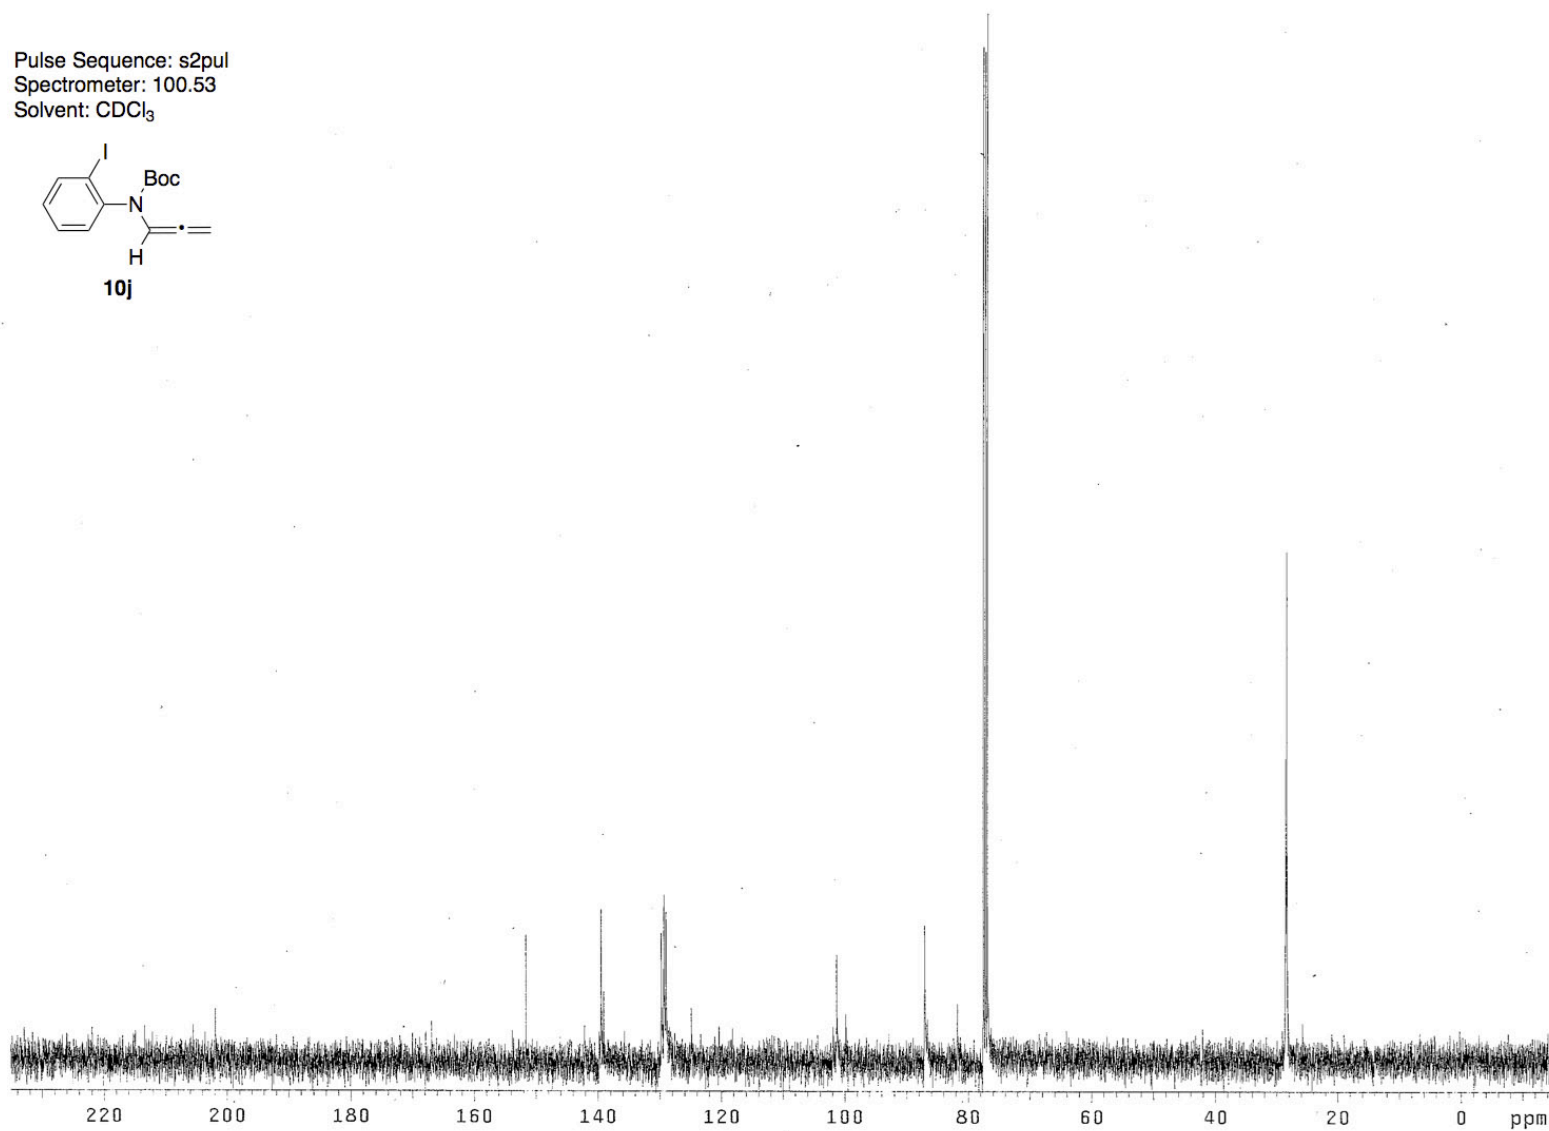



Pulse Sequence: s2pul  
Spectrometer: 399.79  
Solvent: CDCl<sub>3</sub>

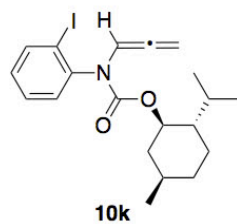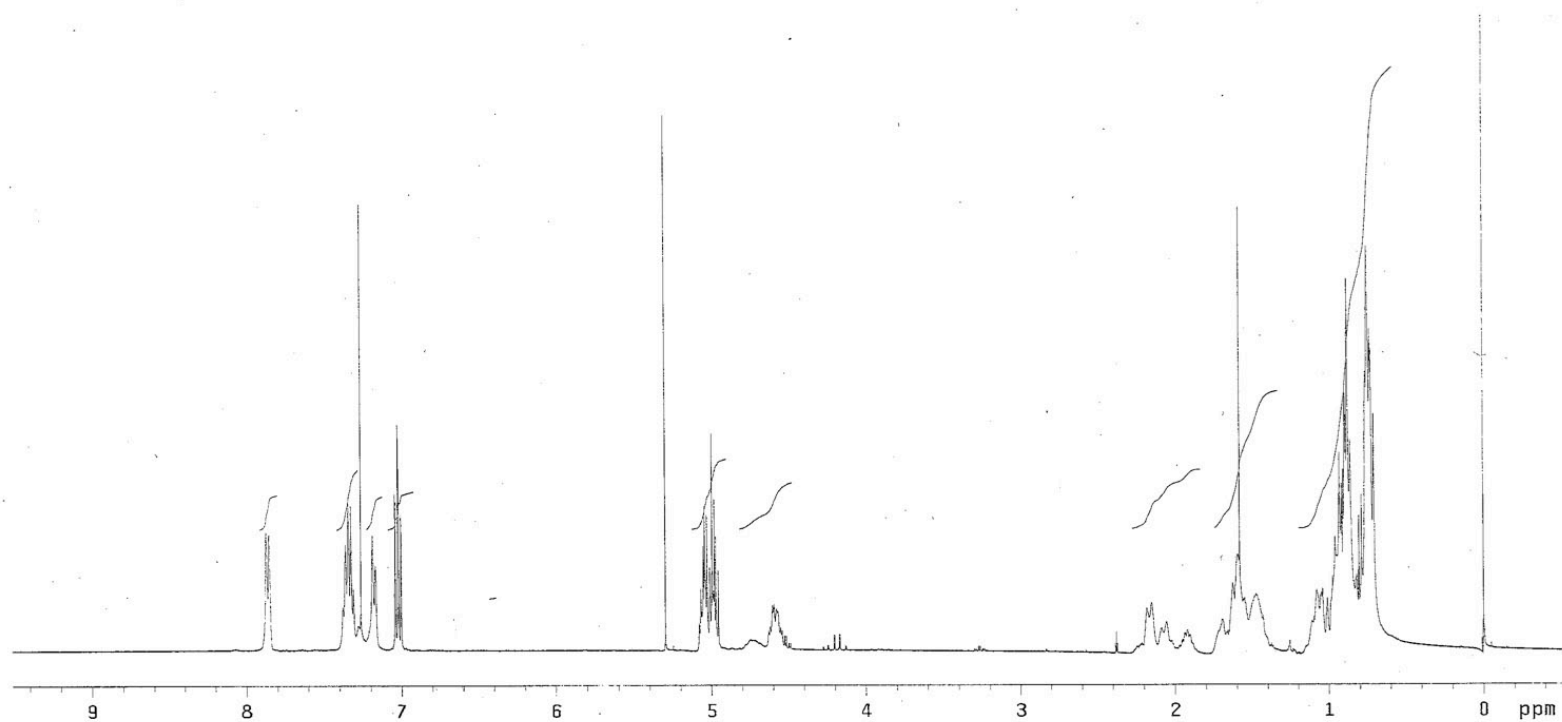

Pulse Sequence: s2pul  
Spectrometer: 100.53  
Solvent: CDCl<sub>3</sub>

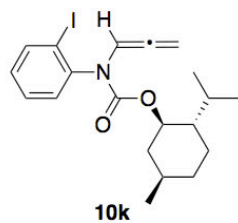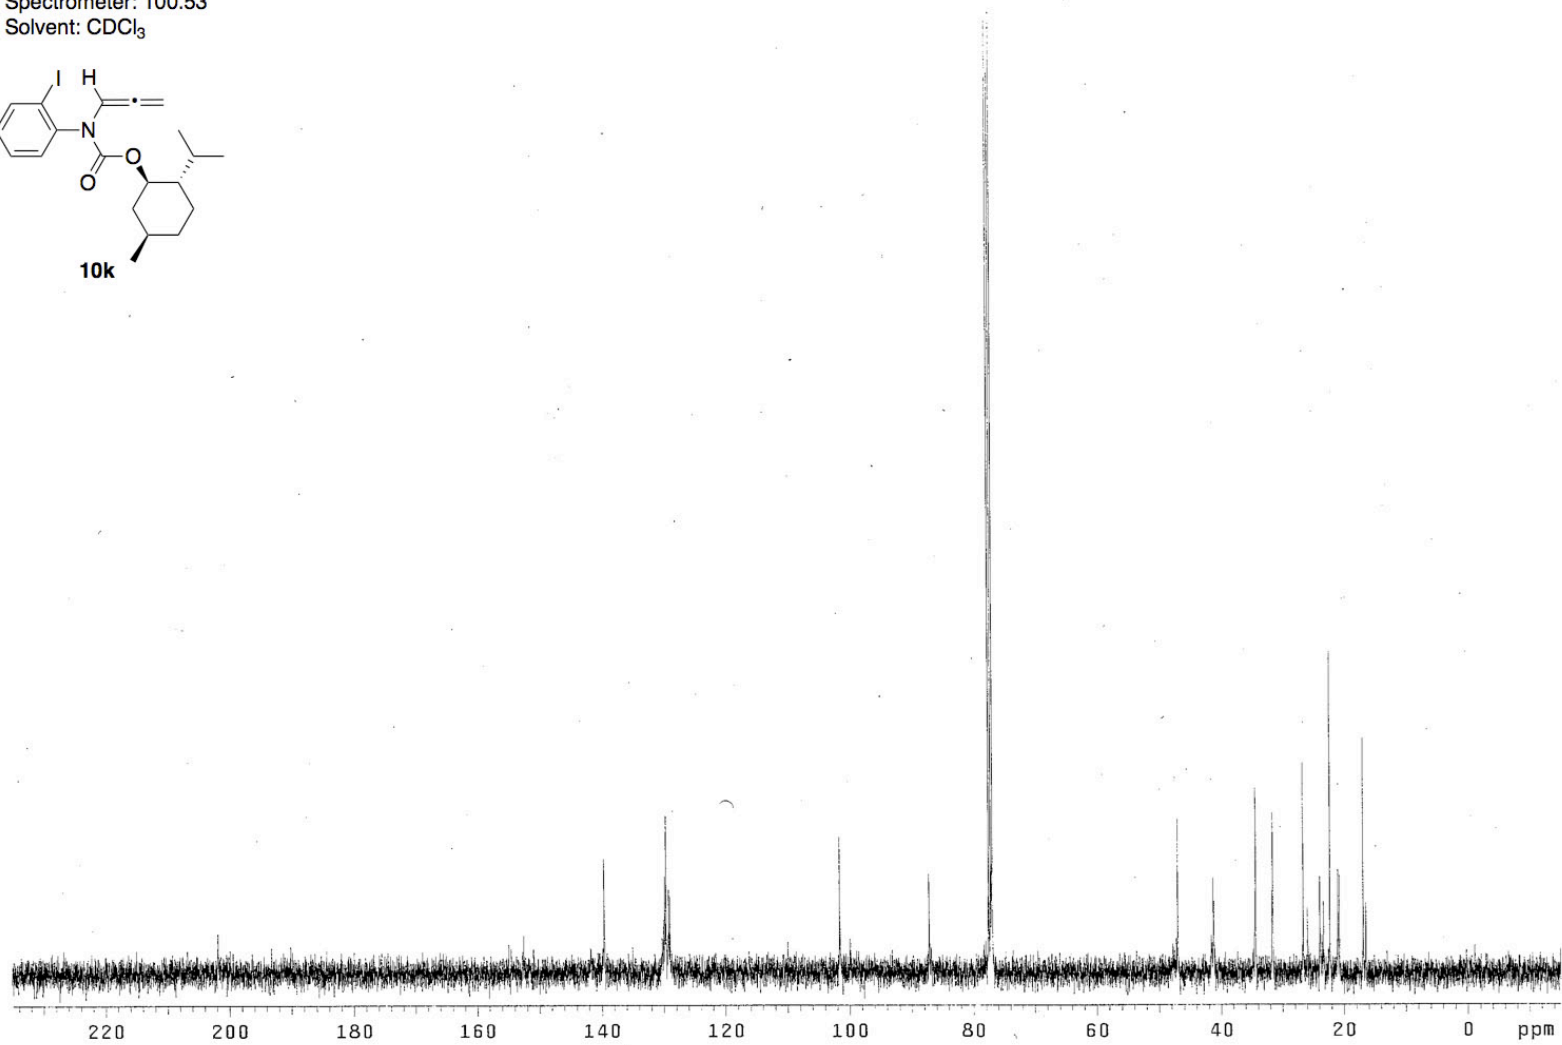

Pulse Sequence: s2pul  
Spectrometer: 399.79  
Solvent: CDCl<sub>3</sub>

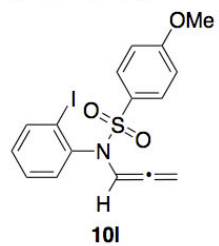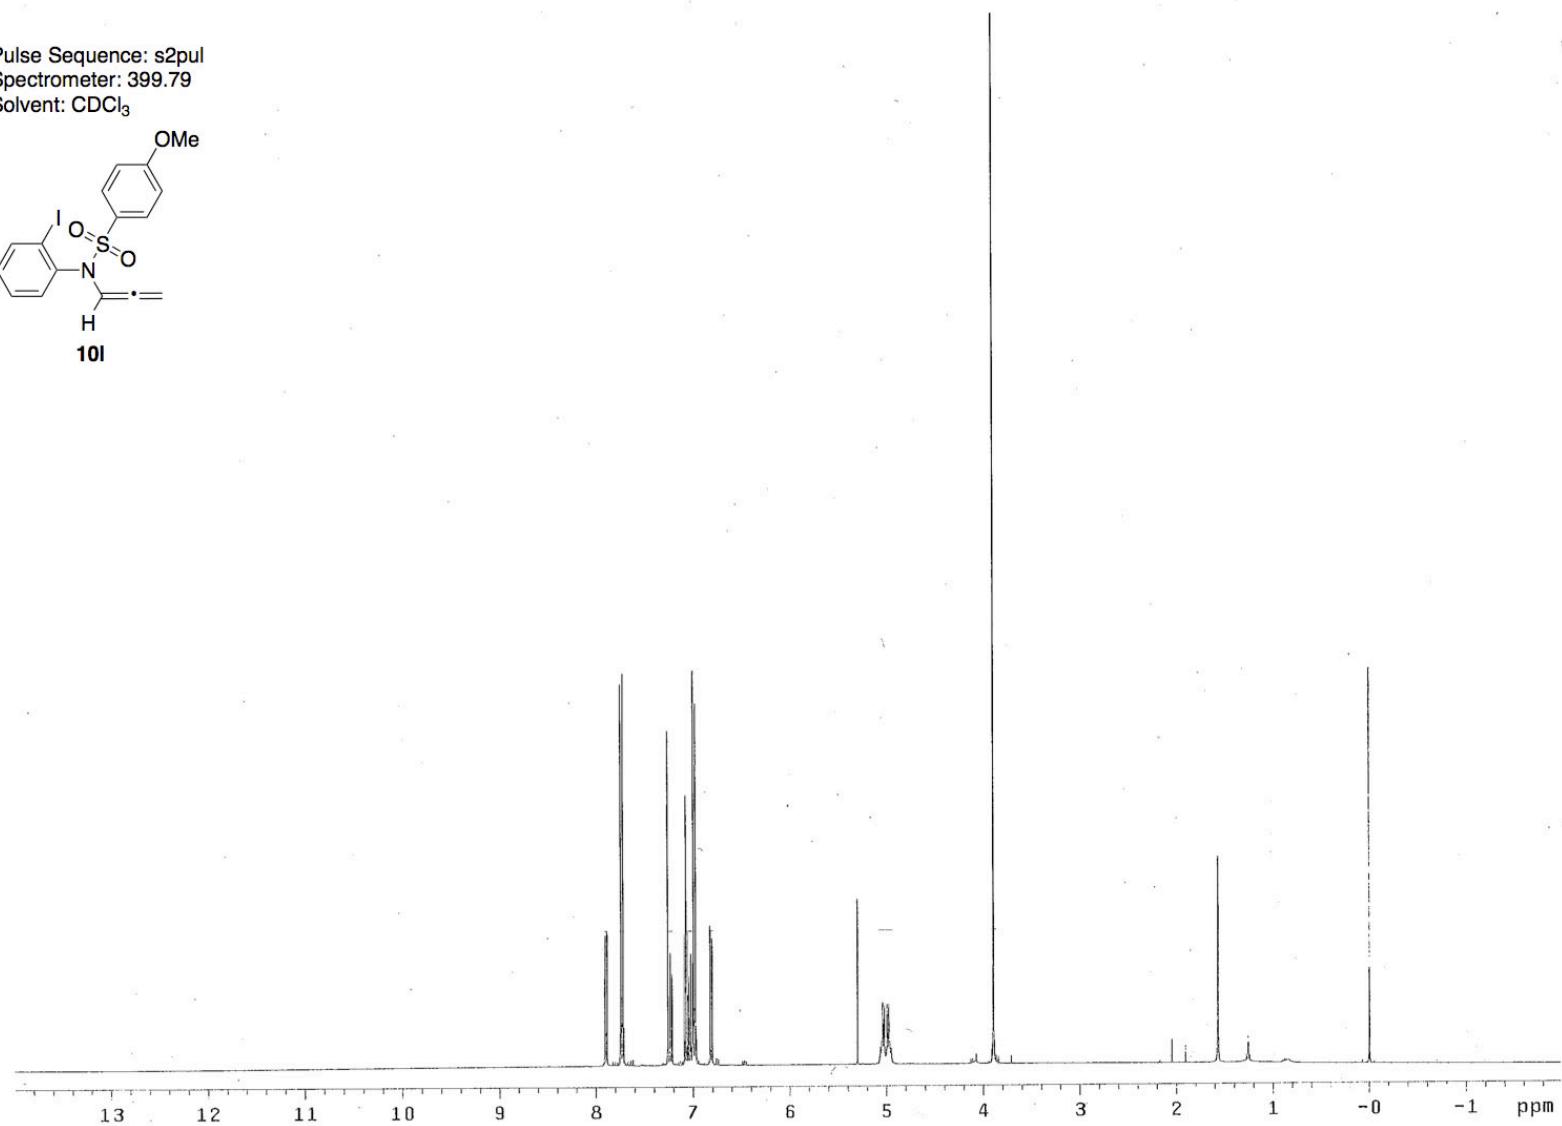

Pulse Sequence: s2pul  
Spectrometer: 100.53  
Solvent: CDCl<sub>3</sub>

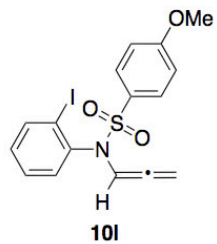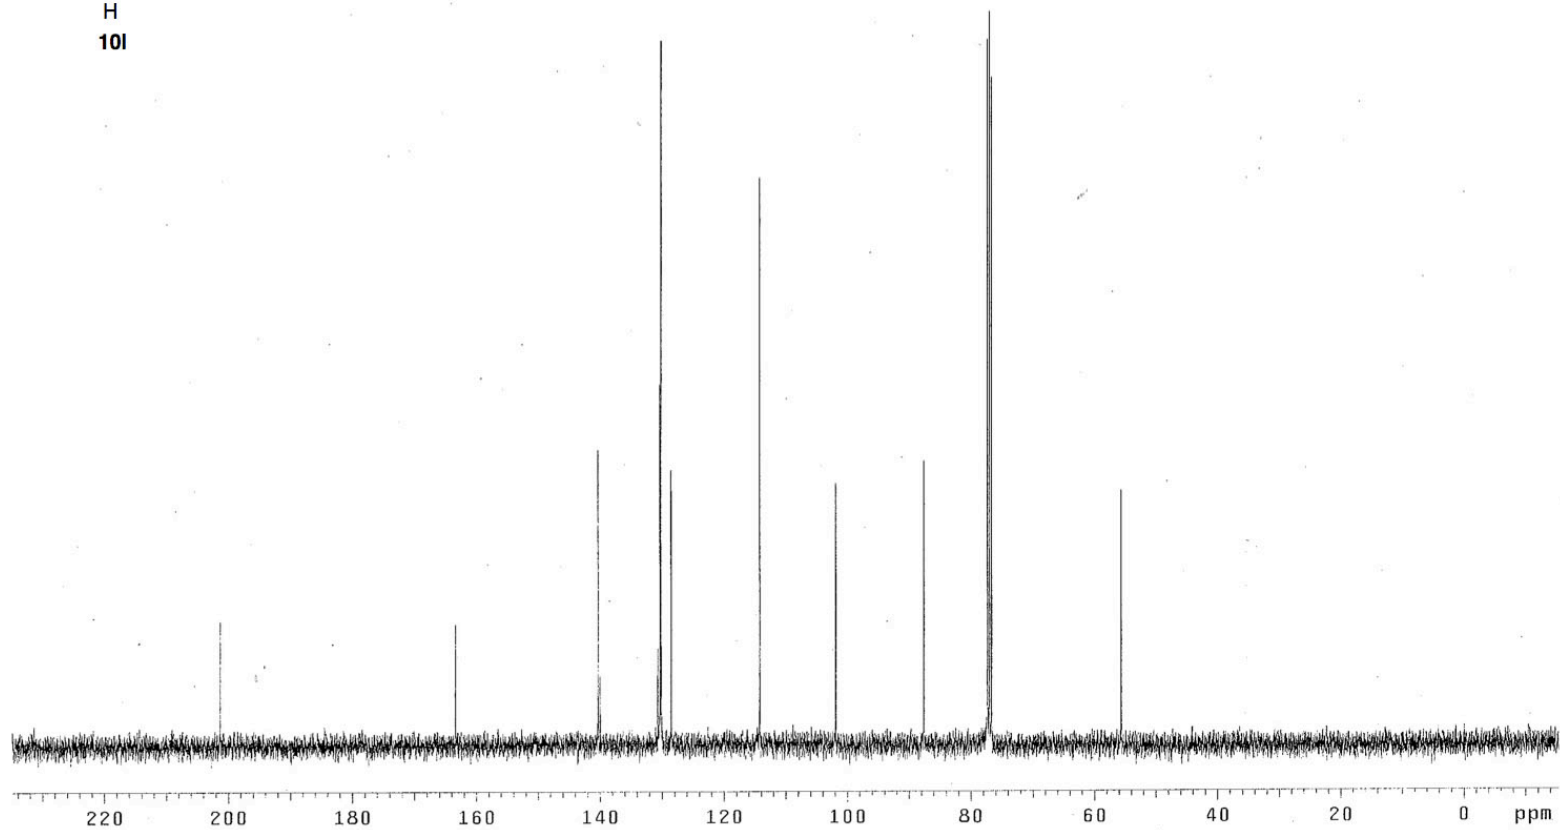

Pulse Sequence: s2pul  
Spectrometer: 399.79  
Solvent: CDCl<sub>3</sub>

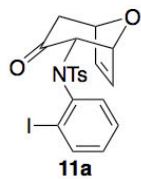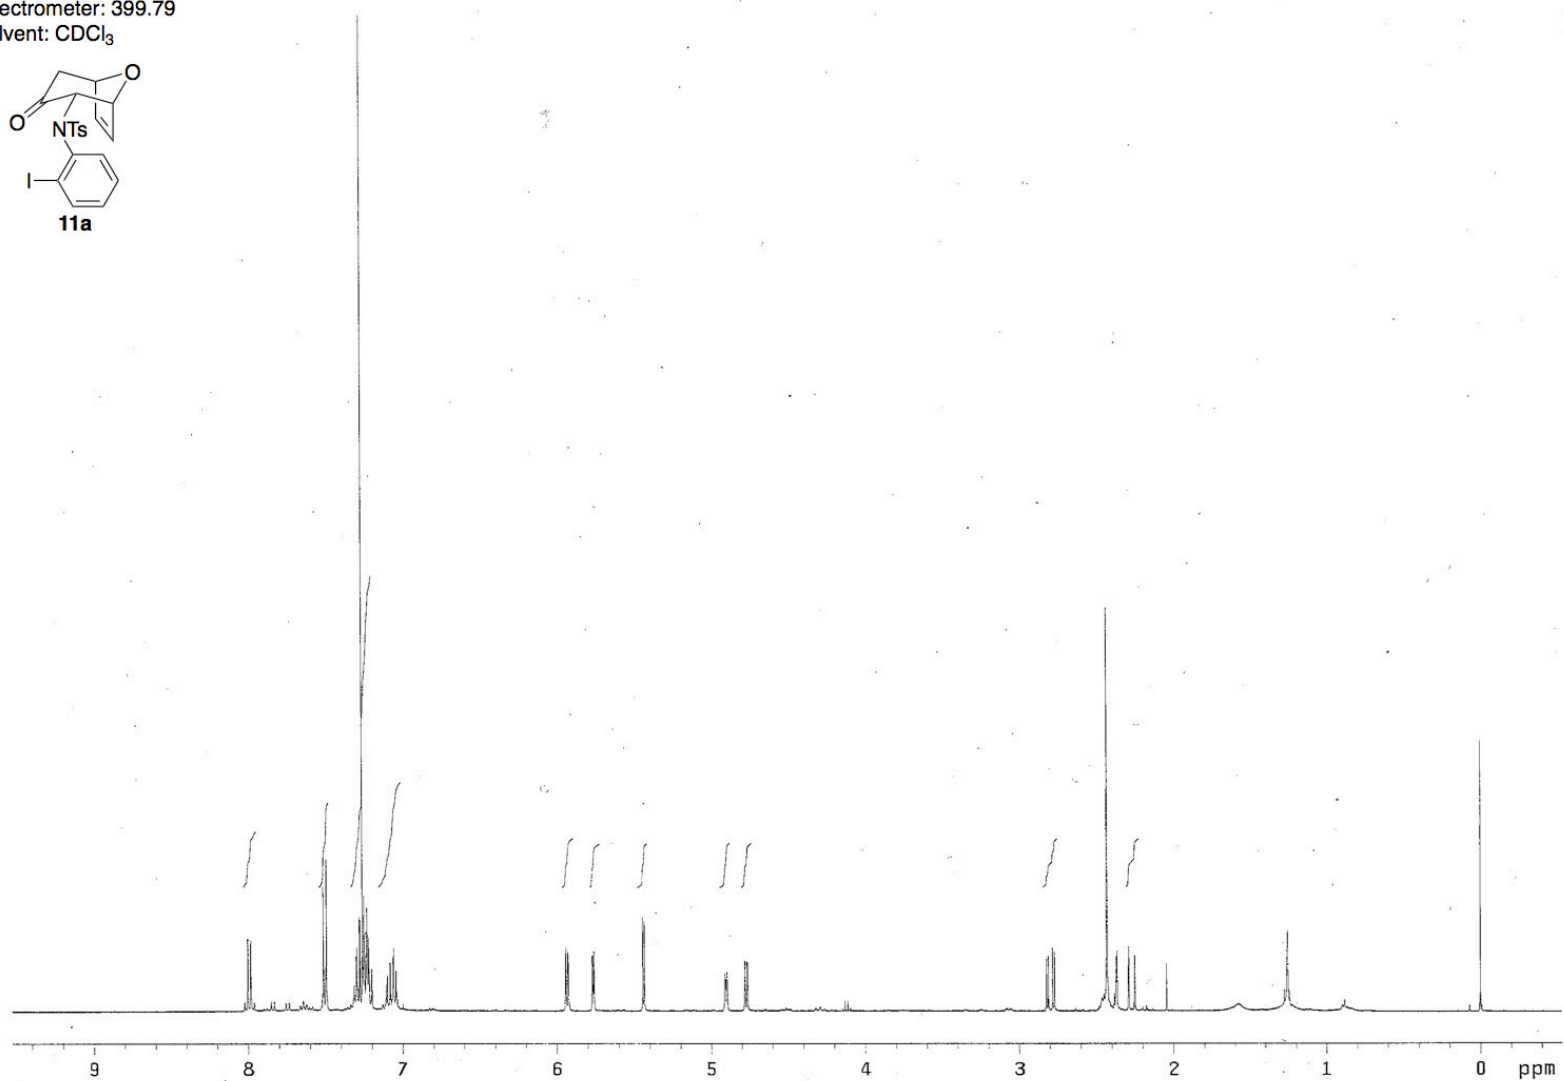

Pulse Sequence: s2pul  
Spectrometer: 100.53  
Solvent: CDCl<sub>3</sub>

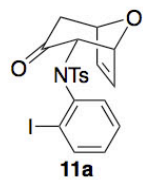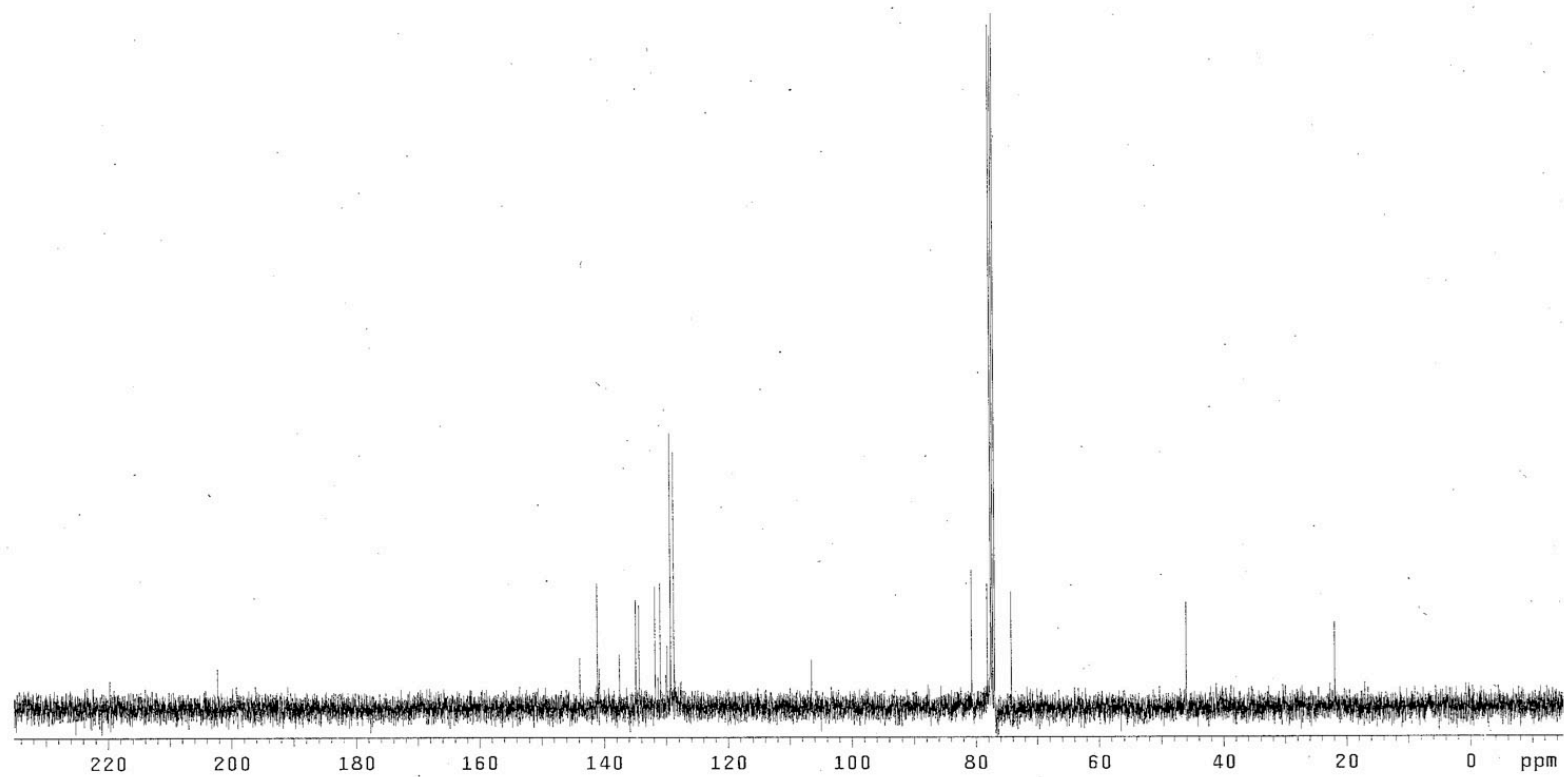

Pulse Sequence: s2pul  
Spectrometer: 399.79  
Solvent: CDCl<sub>3</sub>

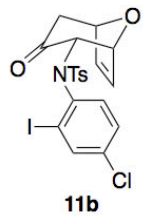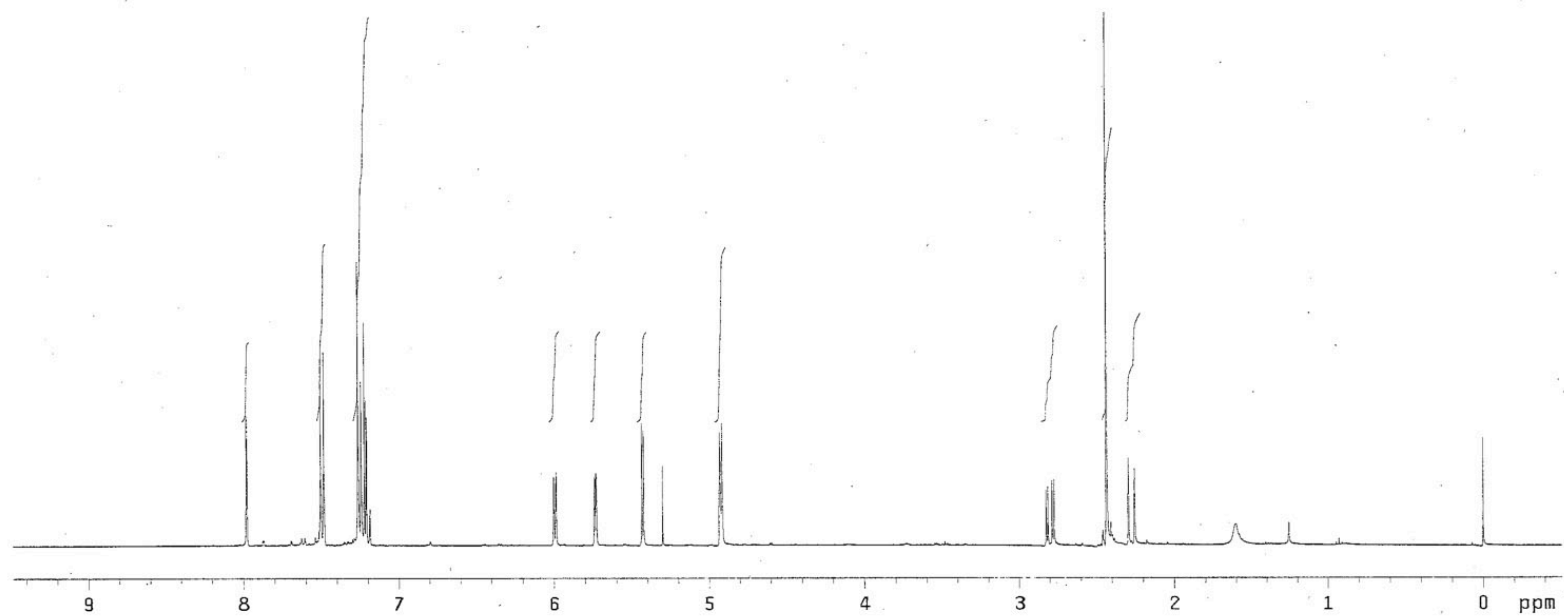

Pulse Sequence: s2pul  
Spectrometer: 100.53  
Solvent: CDCl<sub>3</sub>

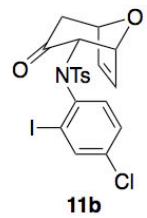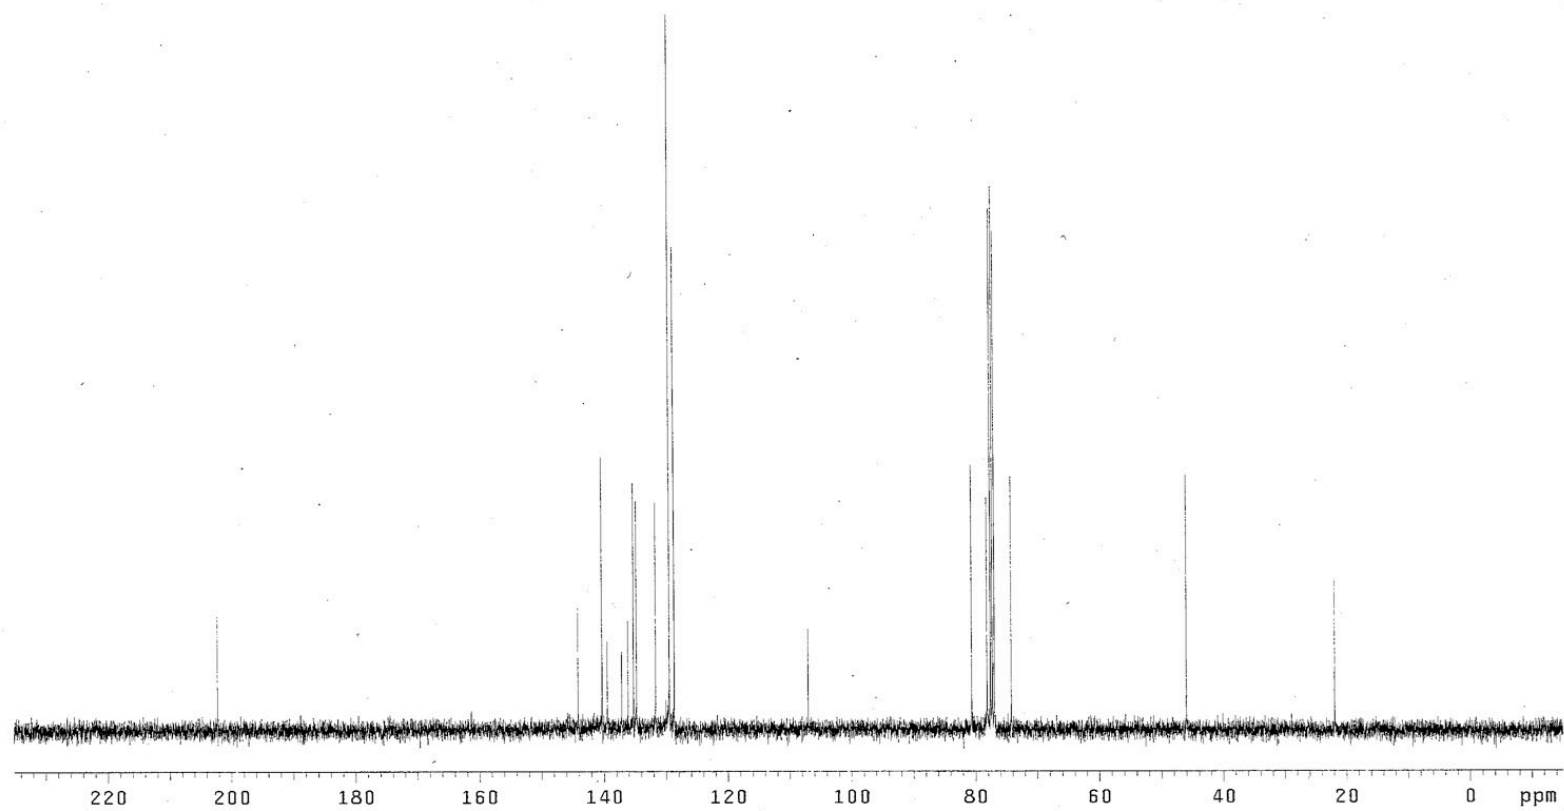



Pulse Sequence: s2pul  
Spectrometer: 399.79  
Solvent: CDCl<sub>3</sub>

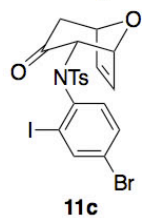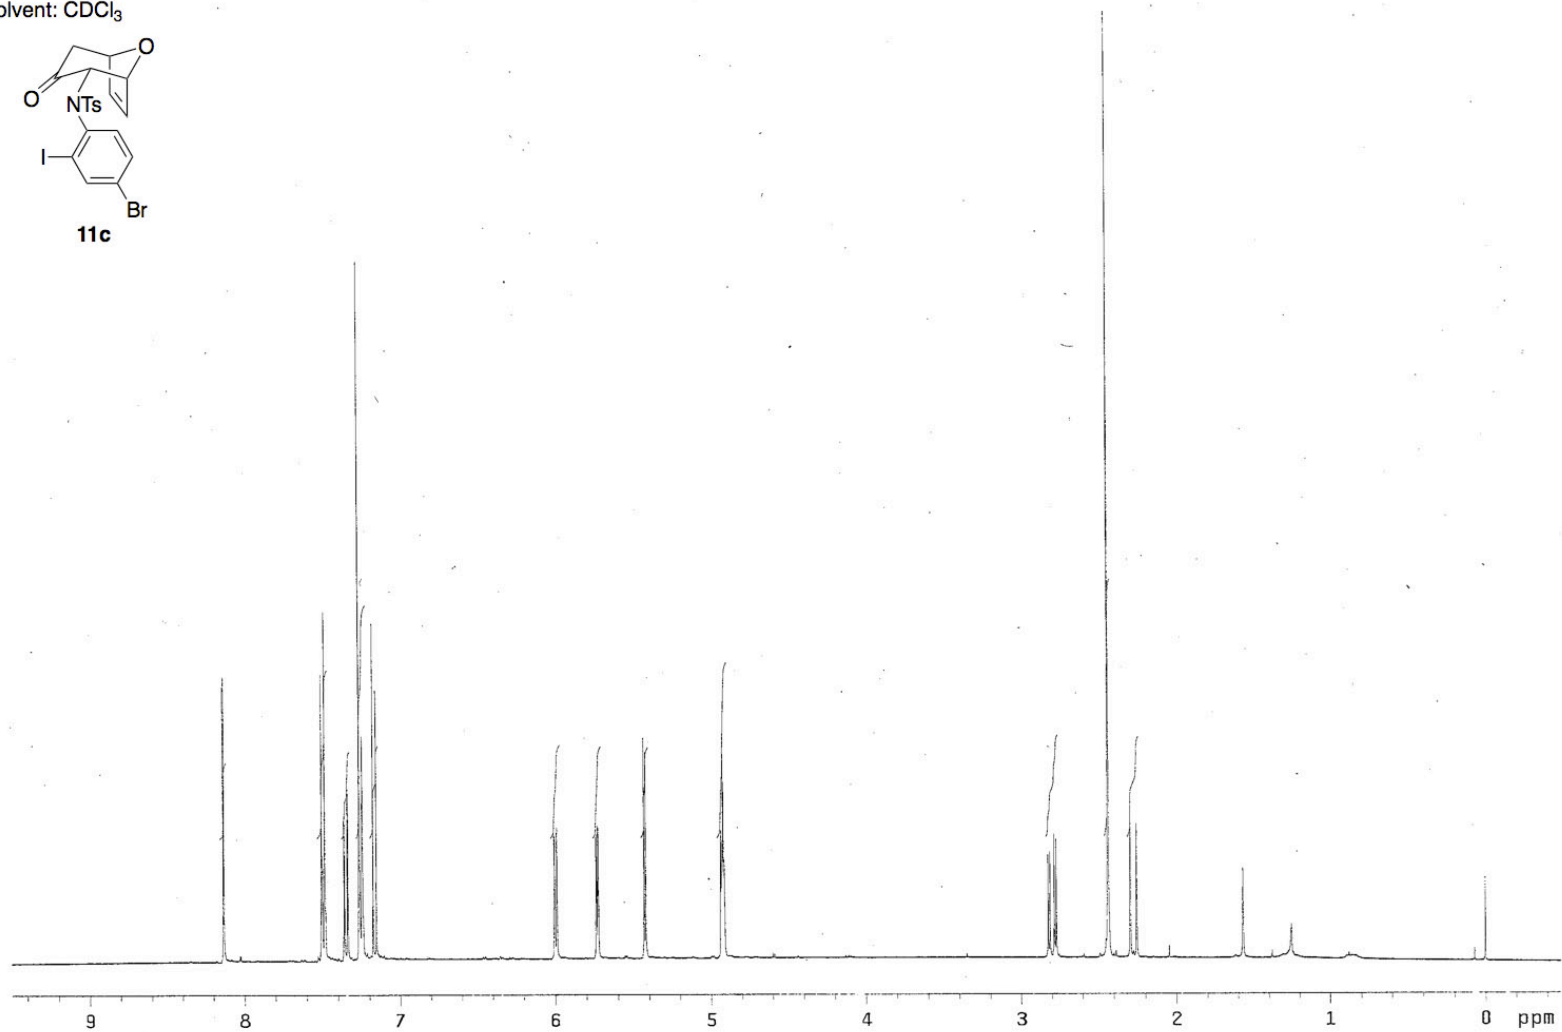

Pulse Sequence: s2pul  
Spectrometer: 100.53  
Solvent: CDCl<sub>3</sub>

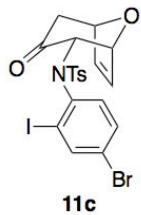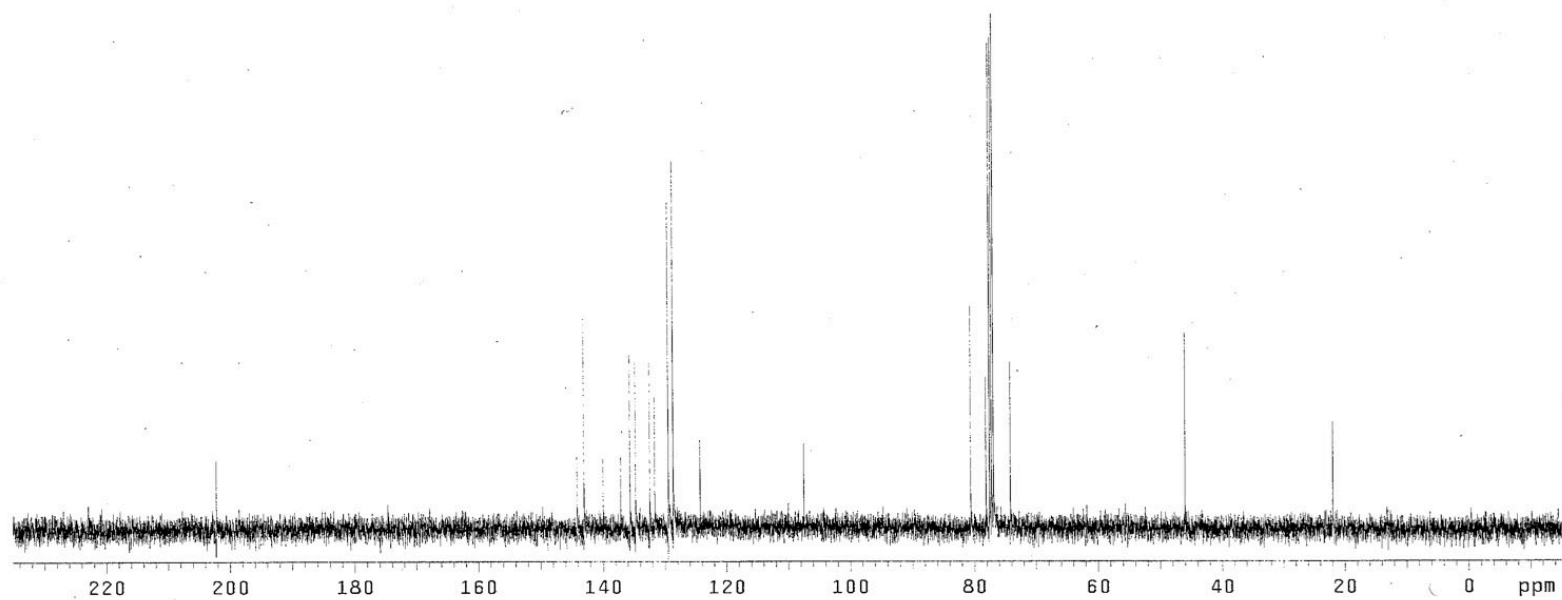

Pulse Sequence: s2pul  
Spectrometer: 399.79  
Solvent: CDCl<sub>3</sub>

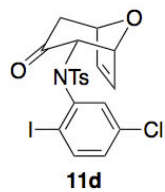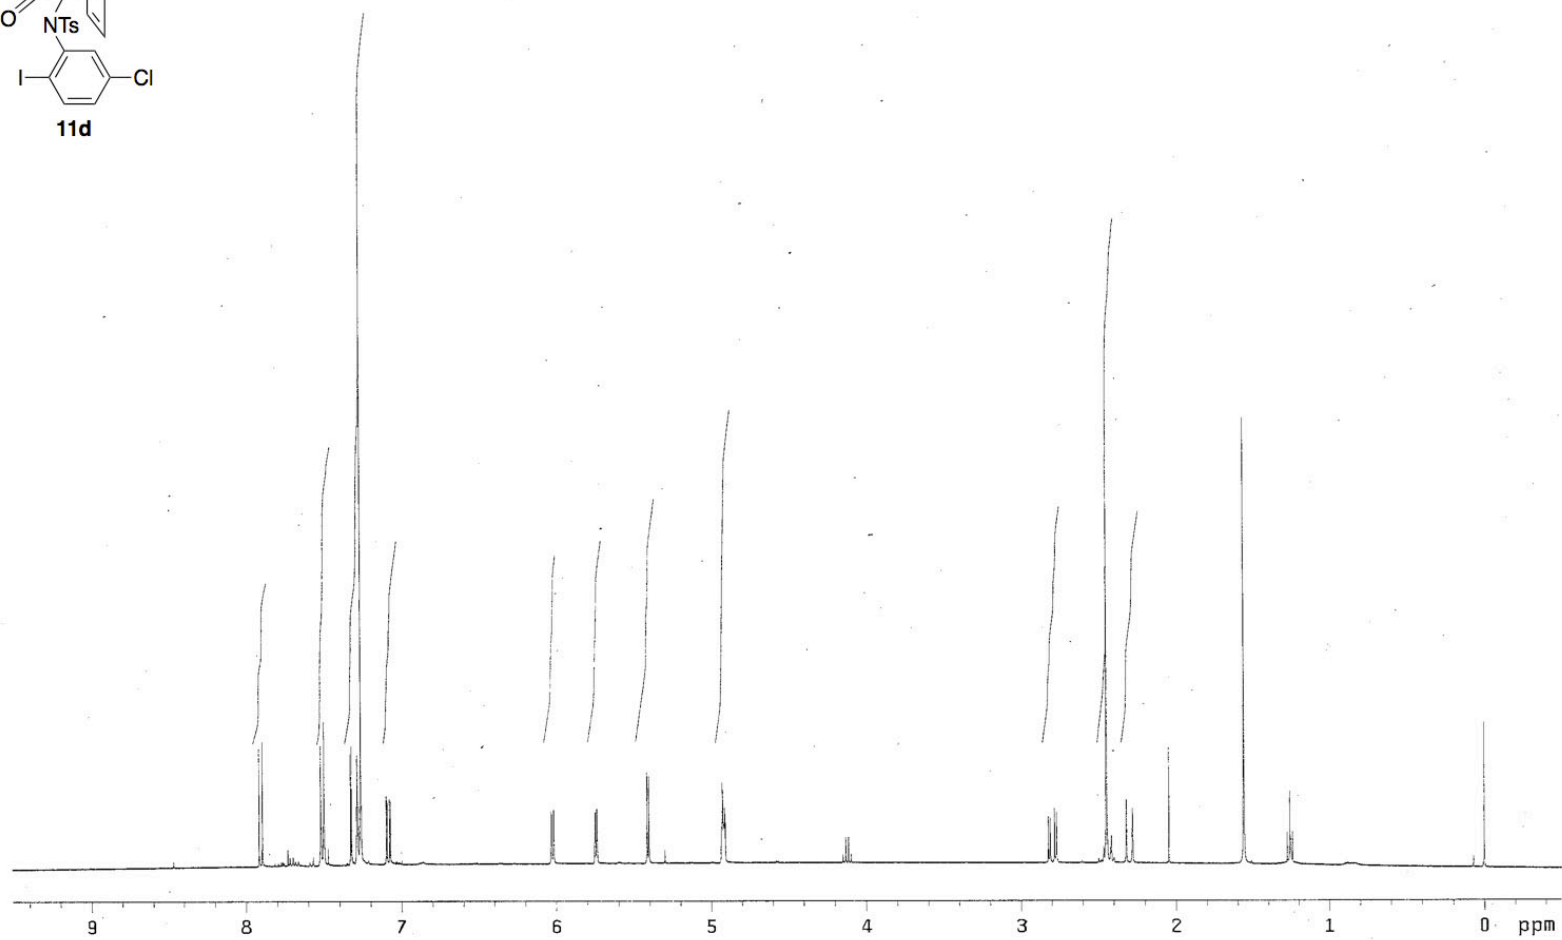

Pulse Sequence: s2pul  
Spectrometer: 100.53  
Solvent: CDCl<sub>3</sub>

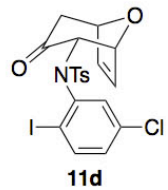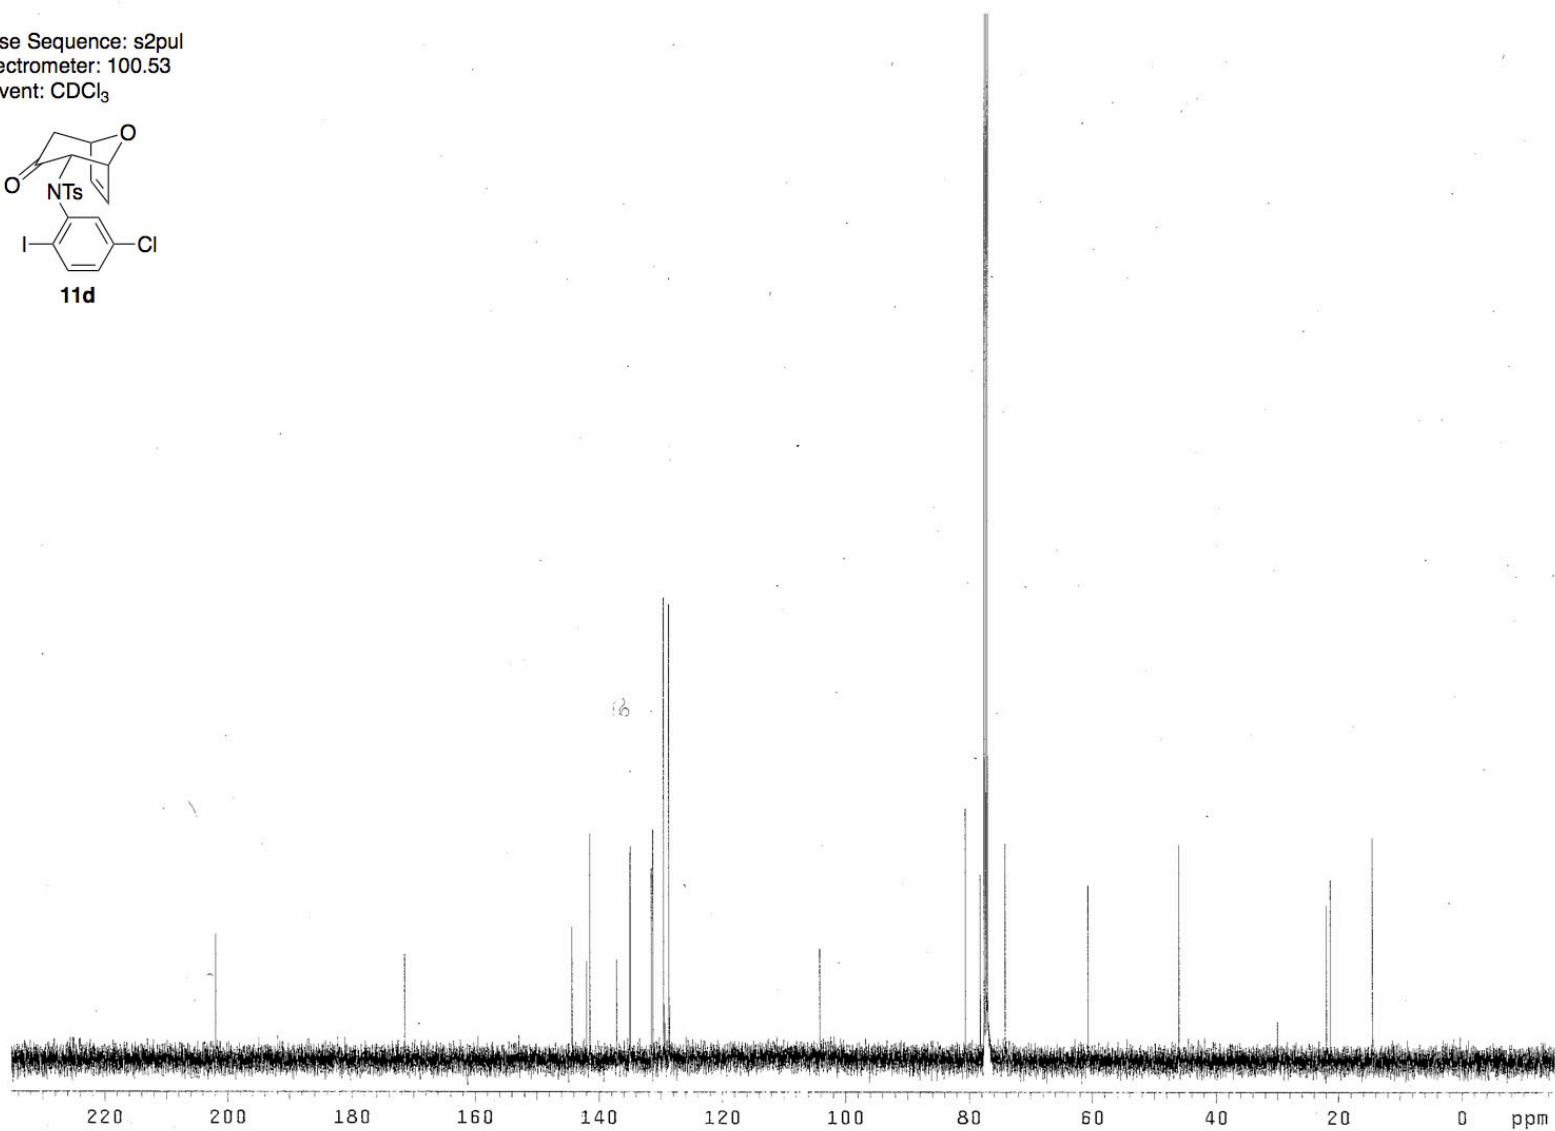

Pulse Sequence: s2pul  
Spectrometer: 399.79  
Solvent: CDCl<sub>3</sub>

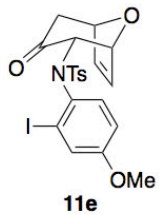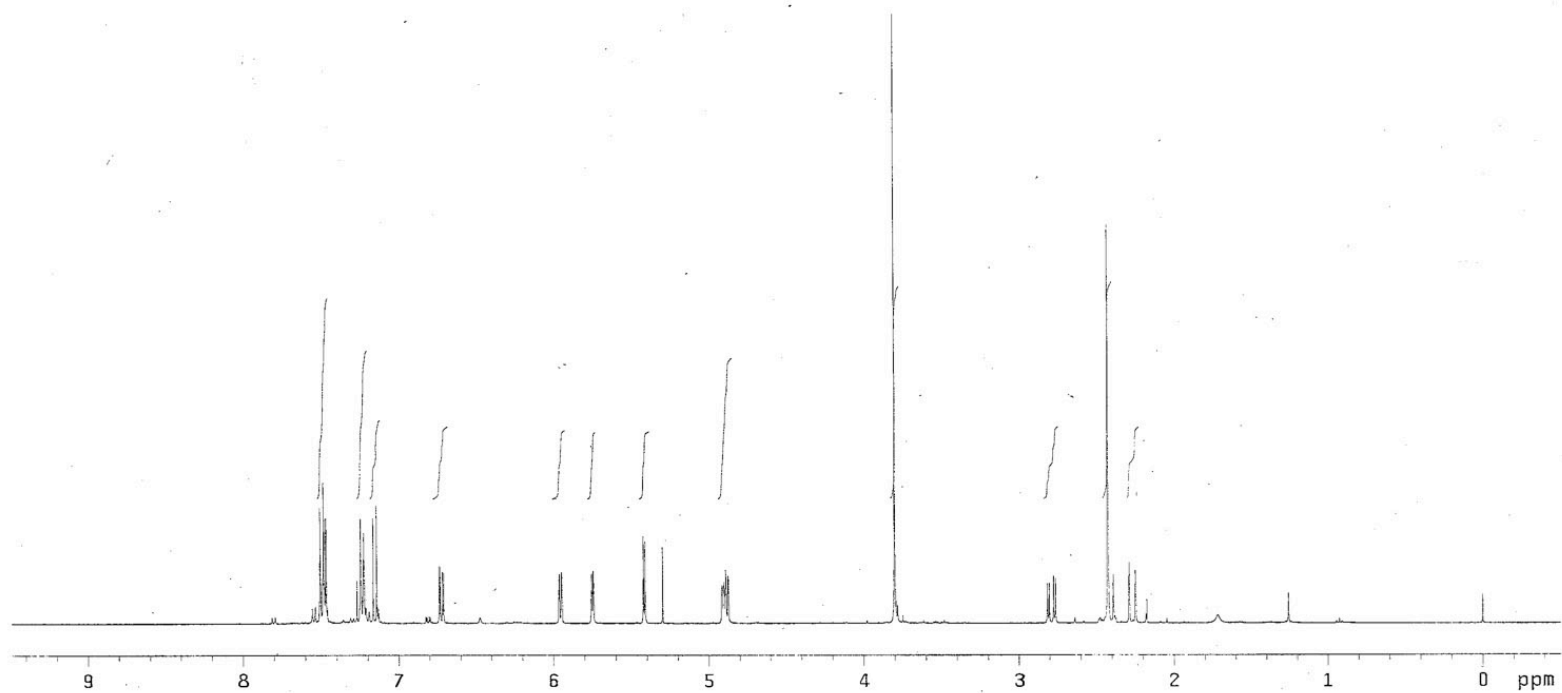

Pulse Sequence: s2pul  
Spectrometer: 100.53  
Solvent: CDCl<sub>3</sub>

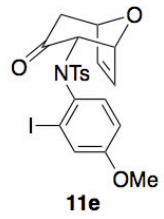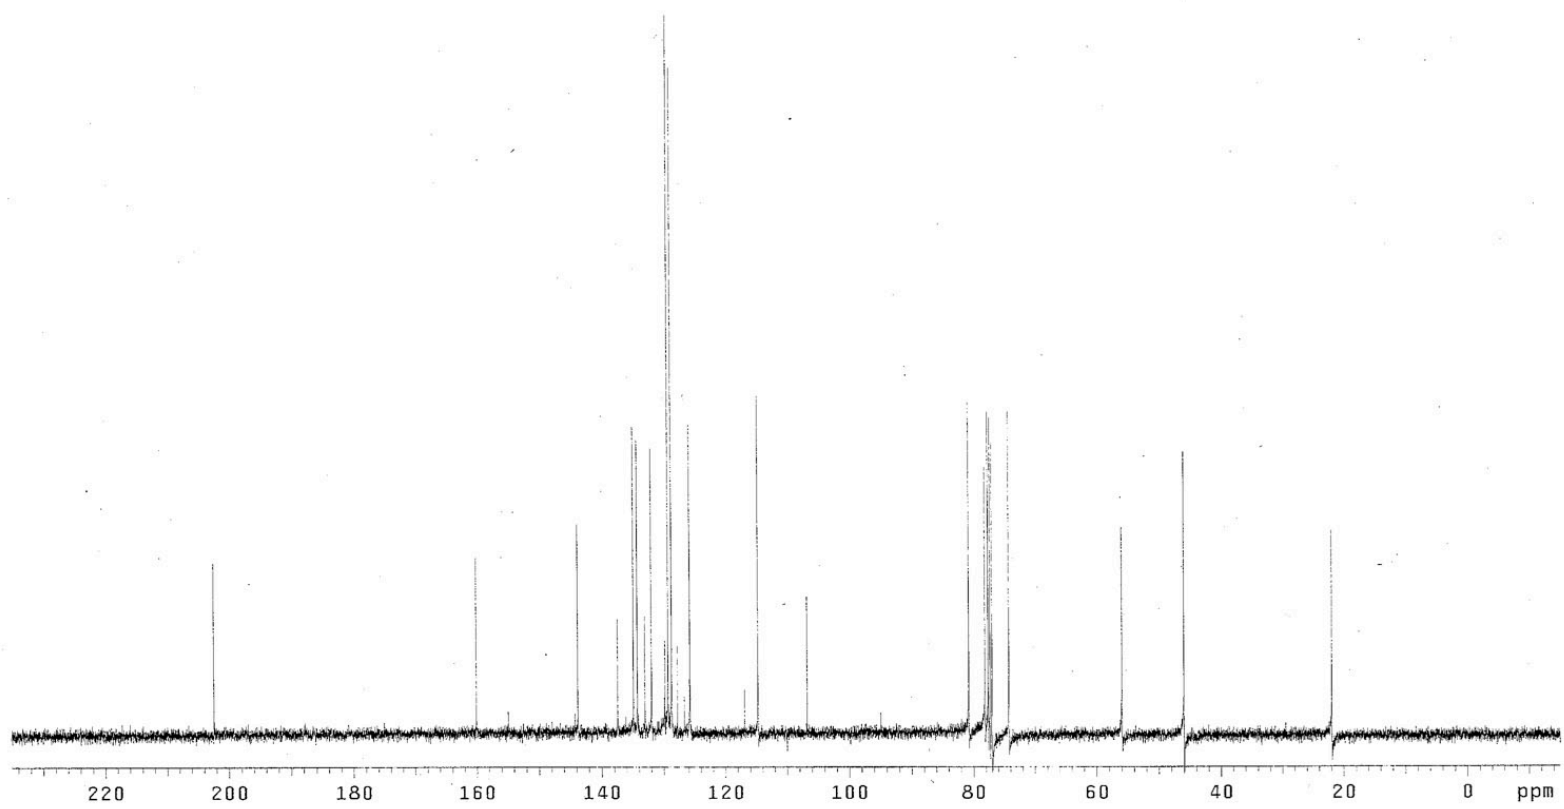

Pulse Sequence: s2pul  
Spectrometer: 399.79  
Solvent: CDCl<sub>3</sub>

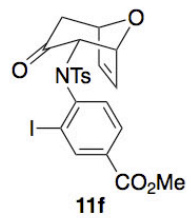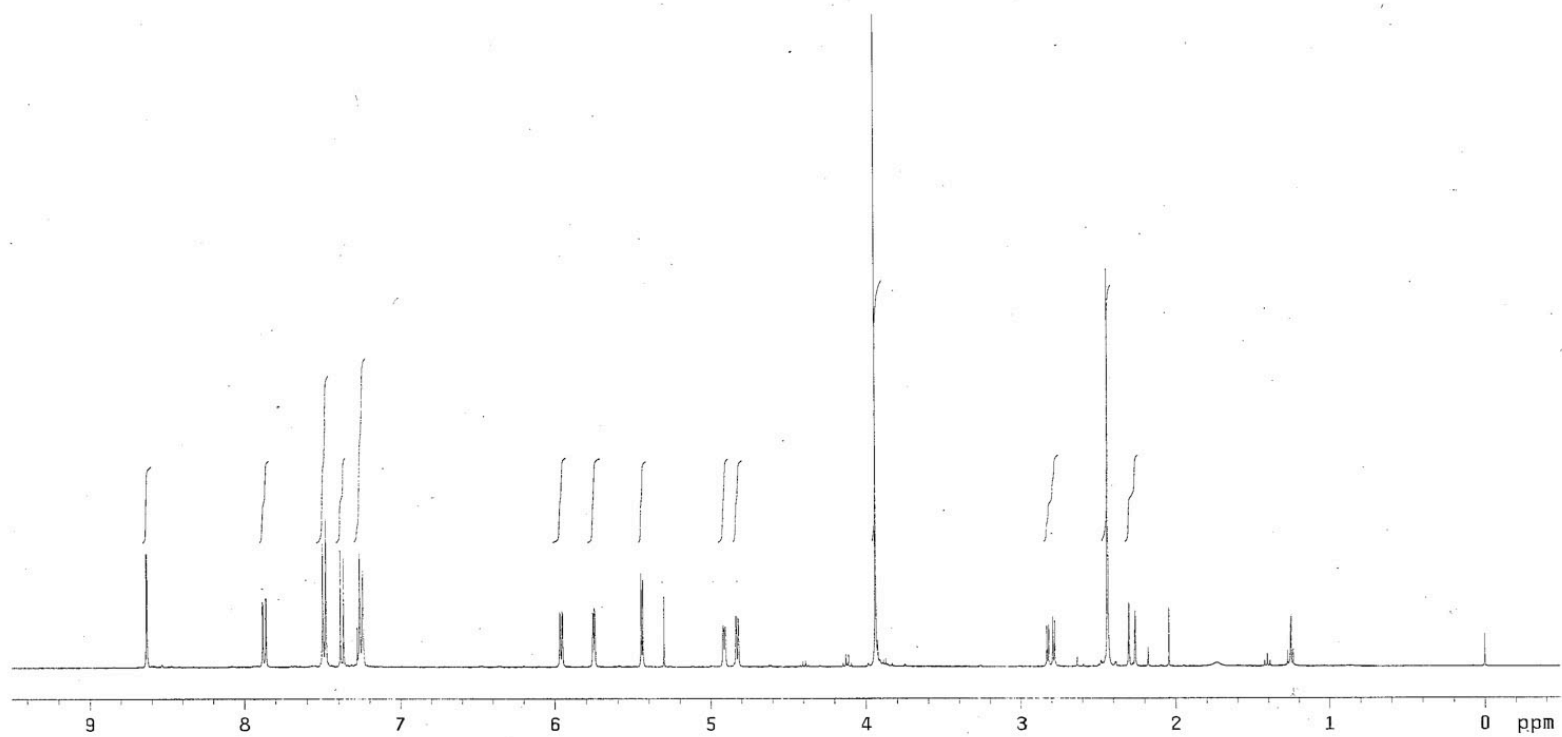

Pulse Sequence: s2pul  
Spectrometer: 100.53  
Solvent: CDCl<sub>3</sub>

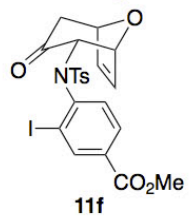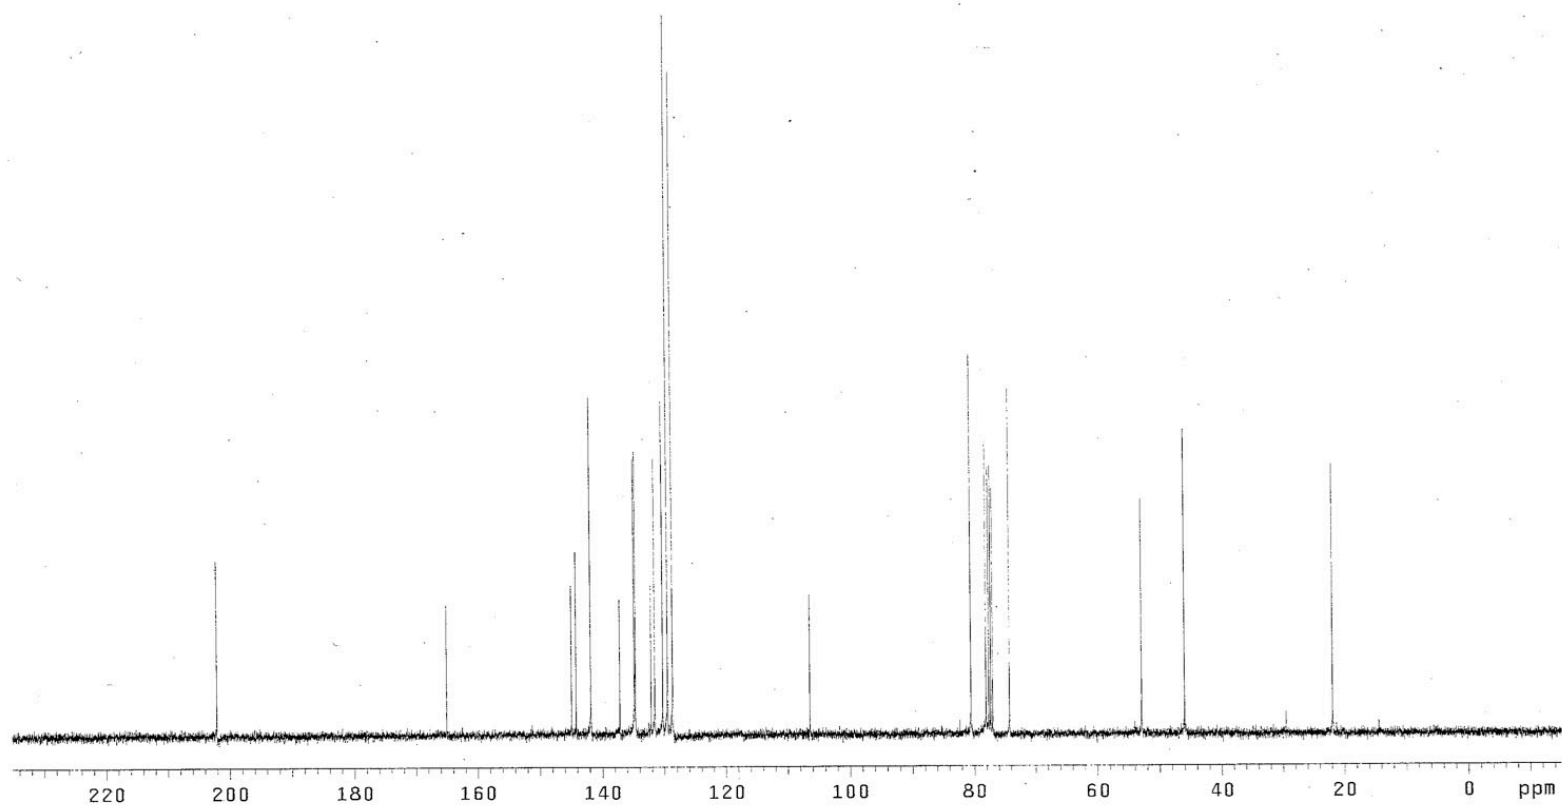



Pulse Sequence: s2pul  
Spectrometer: 399.79  
Solvent: CDCl<sub>3</sub>

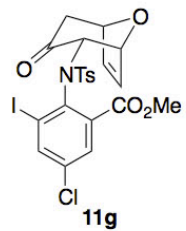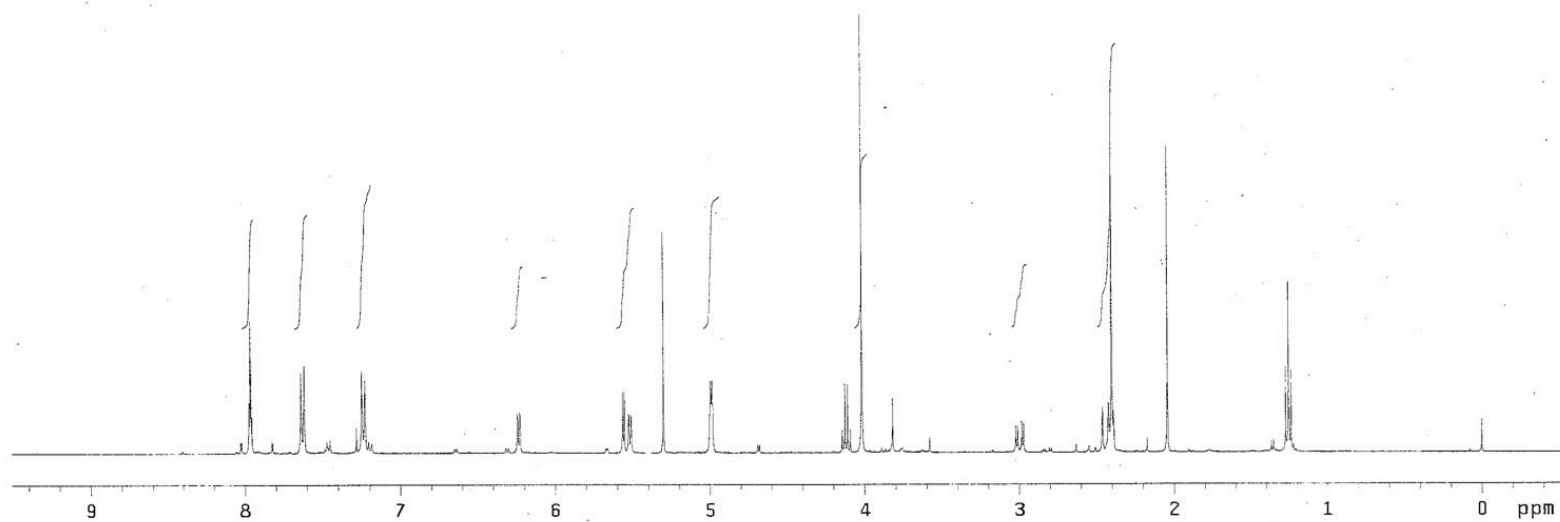

Pulse Sequence: s2pul  
Spectrometer: 100.53  
Solvent: CDCl<sub>3</sub>

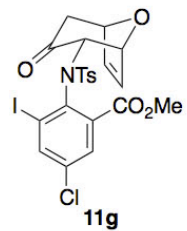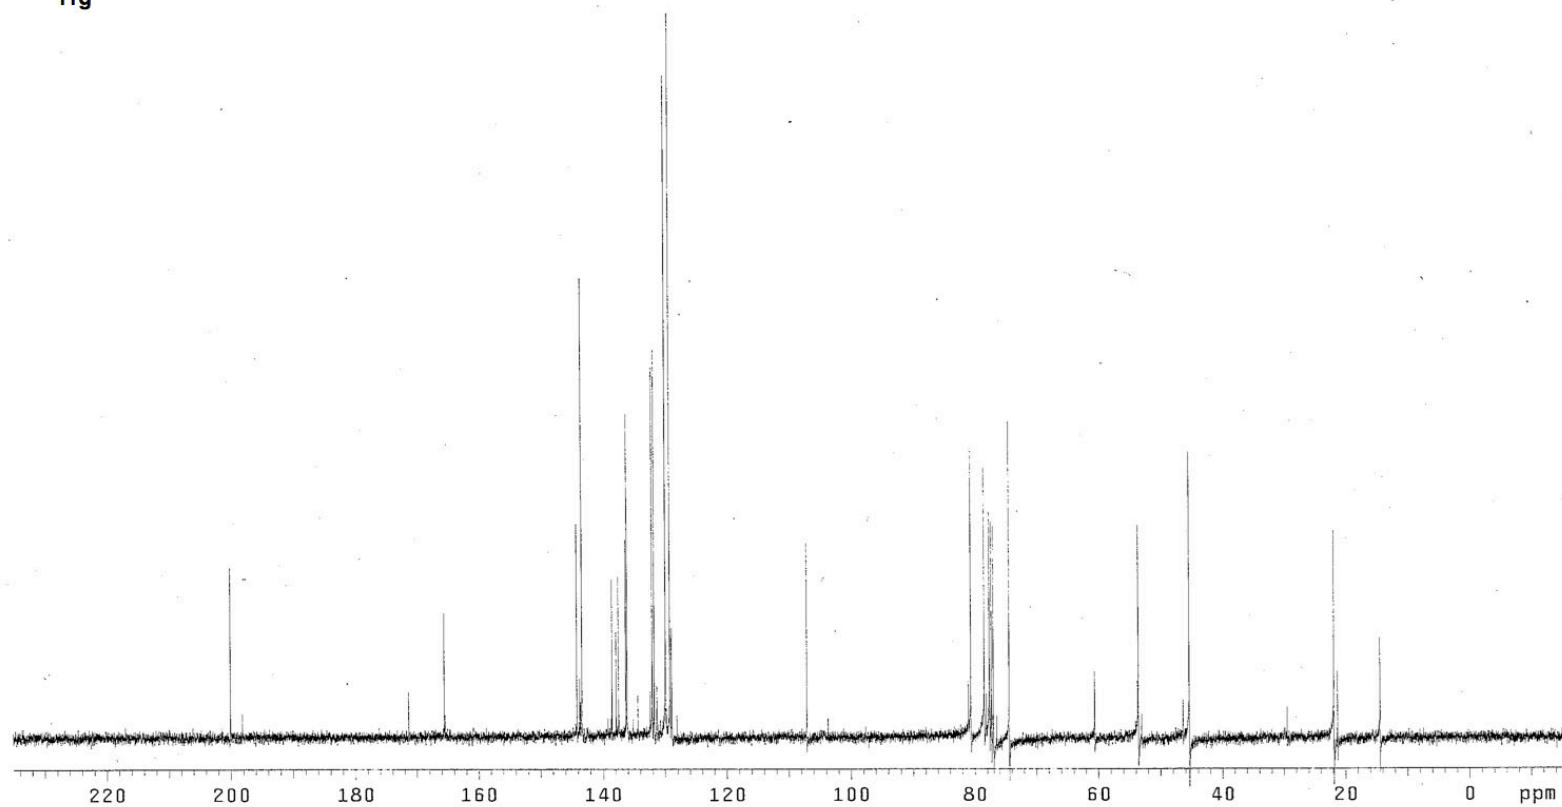

Pulse Sequence: s2pul  
Spectrometer: 399.79  
Solvent: CDCl<sub>3</sub>

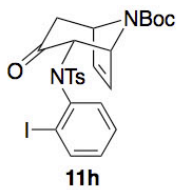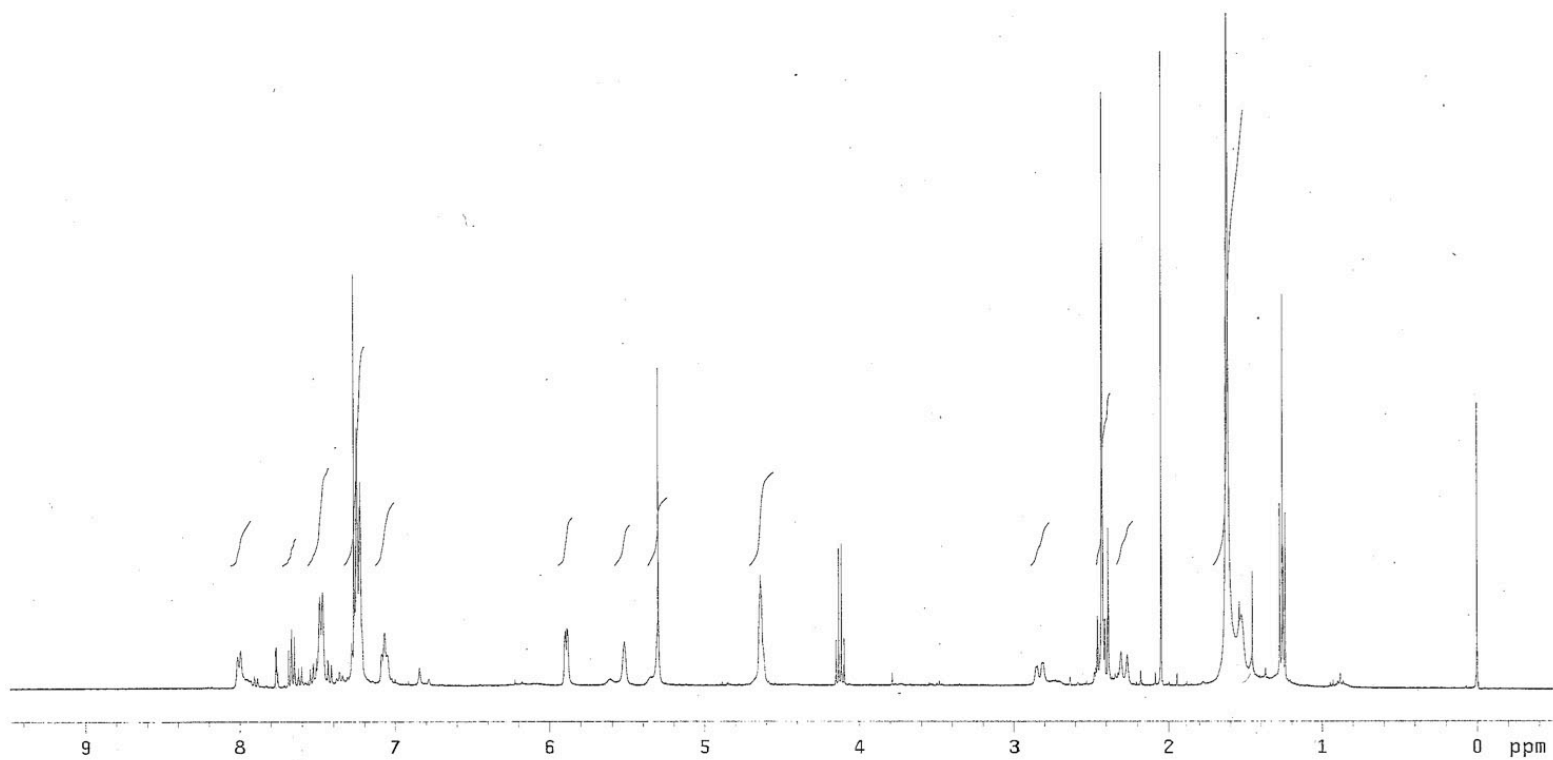

Pulse Sequence: s2pul  
Spectrometer: 100.53  
Solvent: CDCl<sub>3</sub>

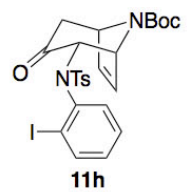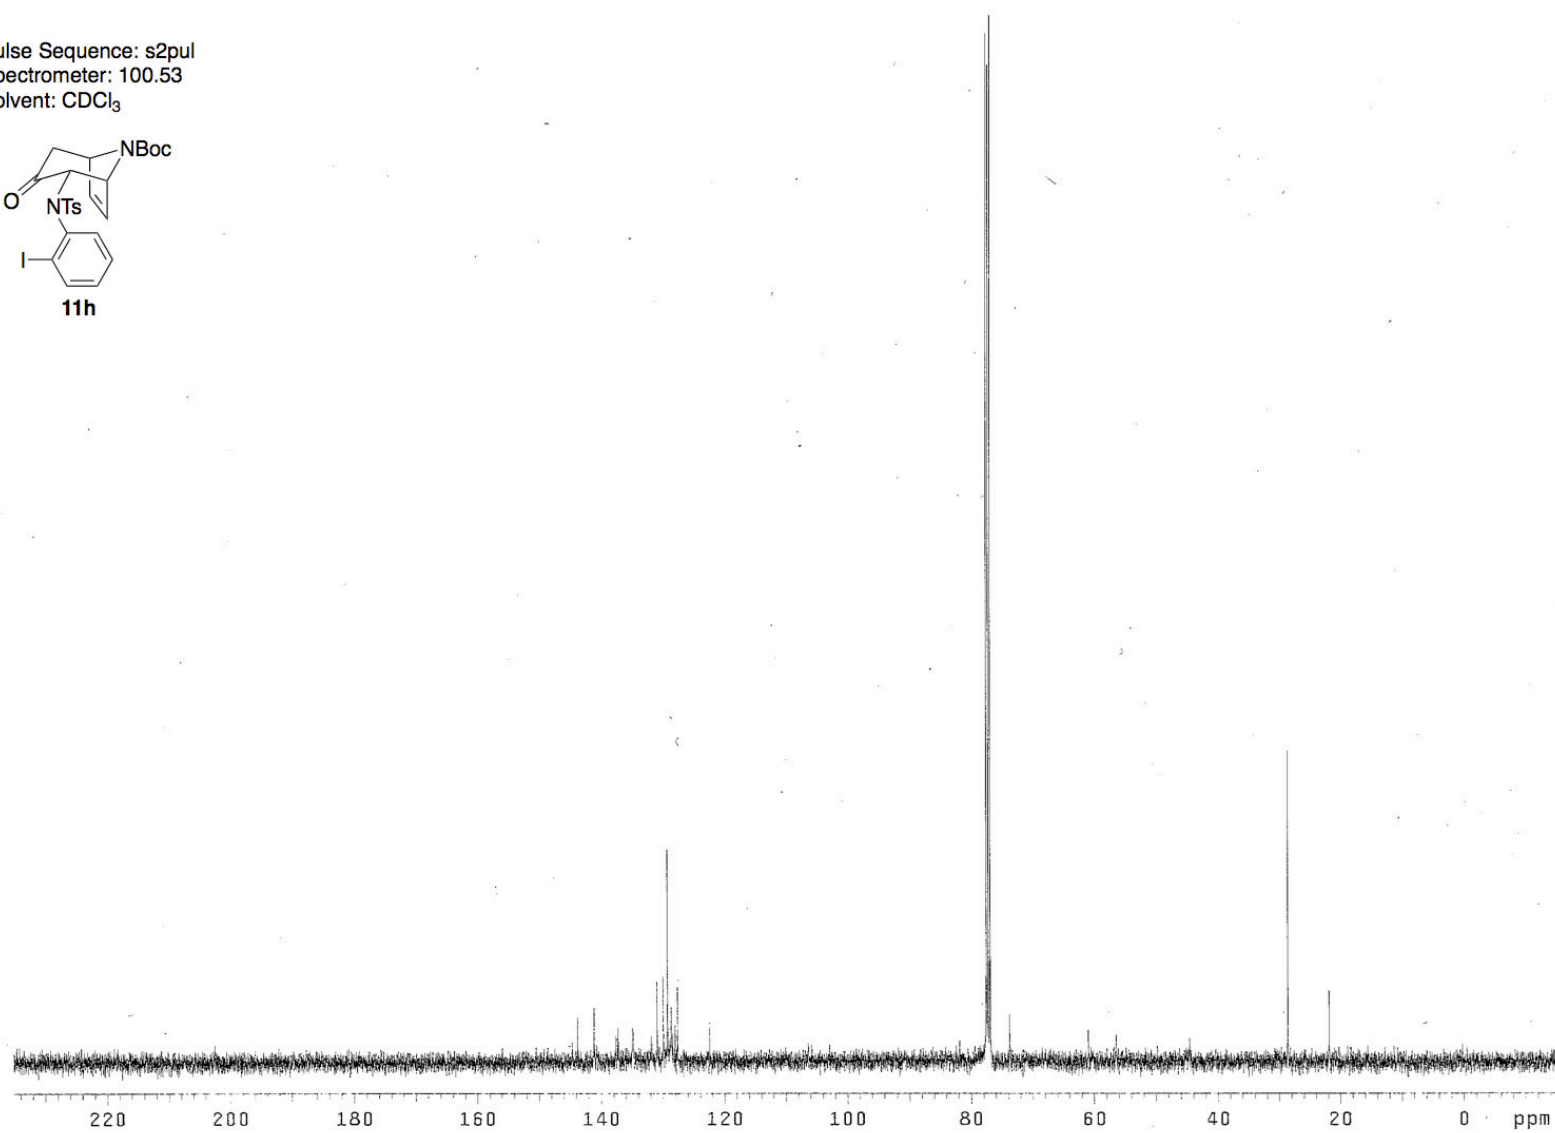

Pulse Sequence: s2pul  
Spectrometer: 399.79  
Solvent: CDCl<sub>3</sub>

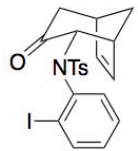

11i

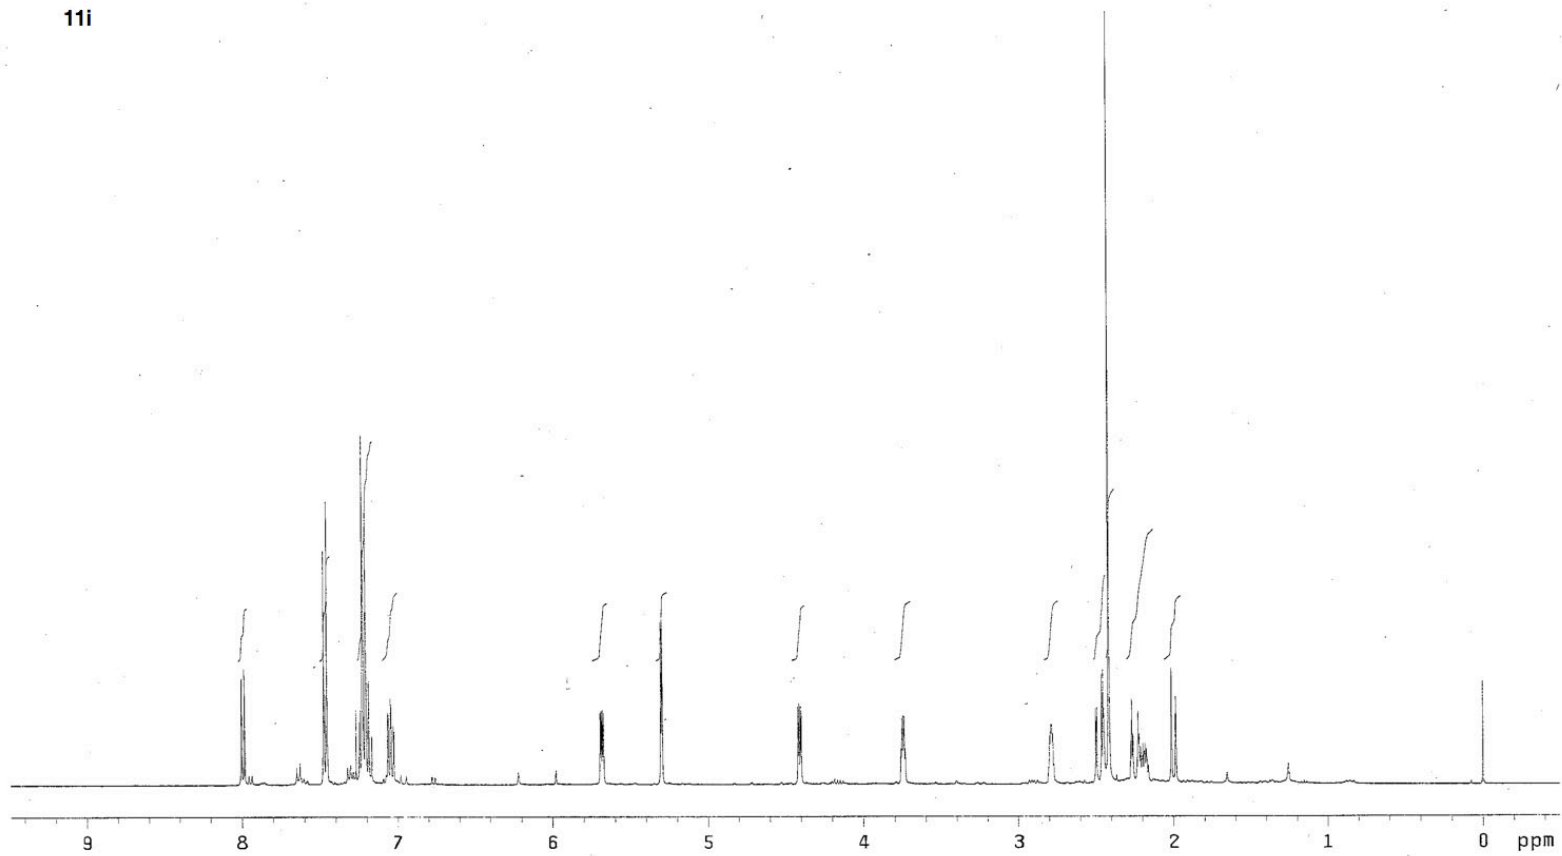

Pulse Sequence: s2pul  
Spectrometer: 100.53  
Solvent: CDCl<sub>3</sub>

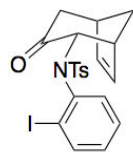

11i

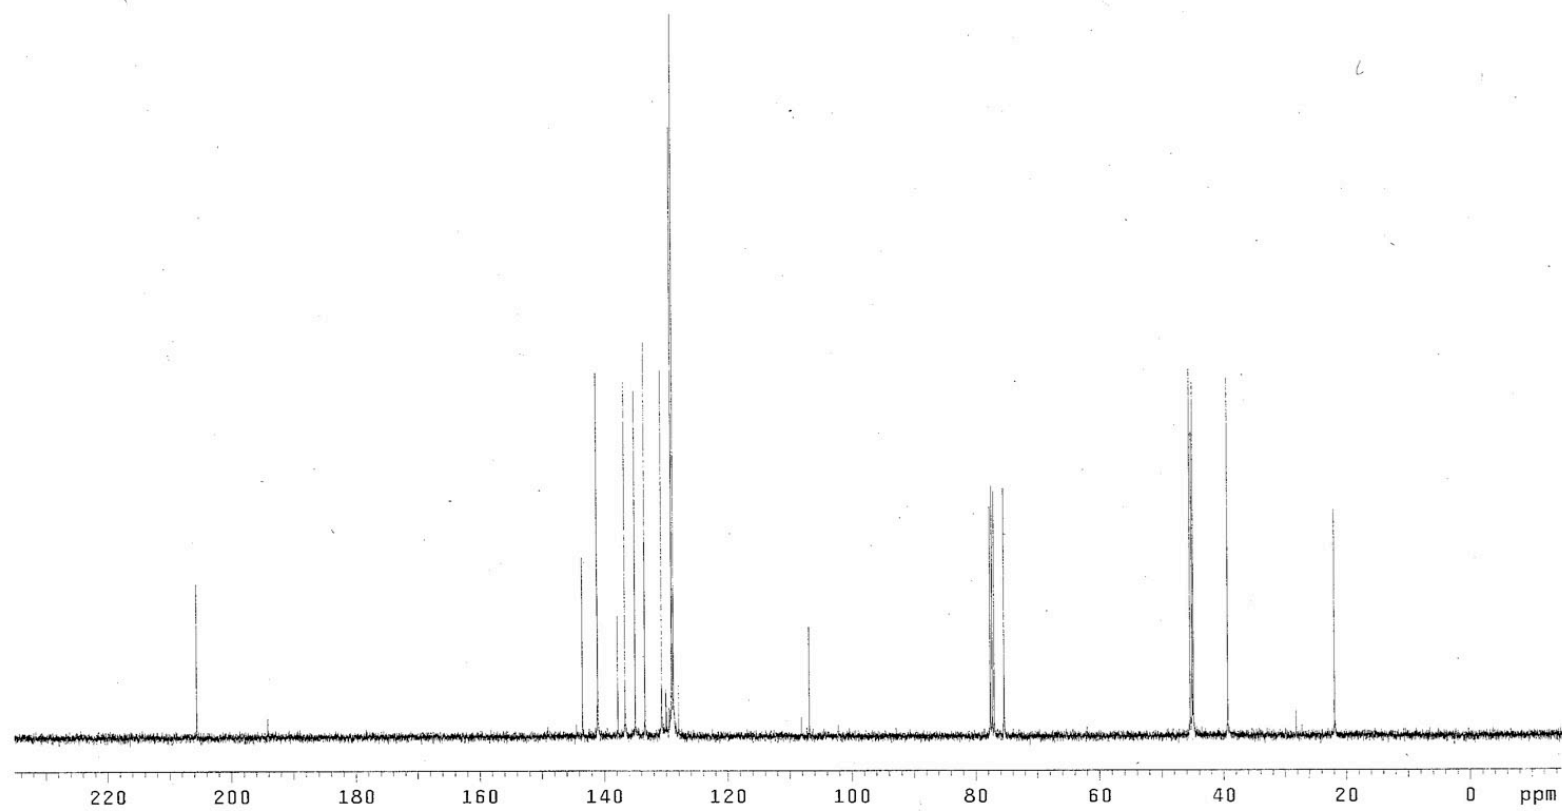

Pulse Sequence: s2pul  
Spectrometer: 399.79  
Solvent: CDCl<sub>3</sub>

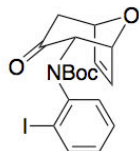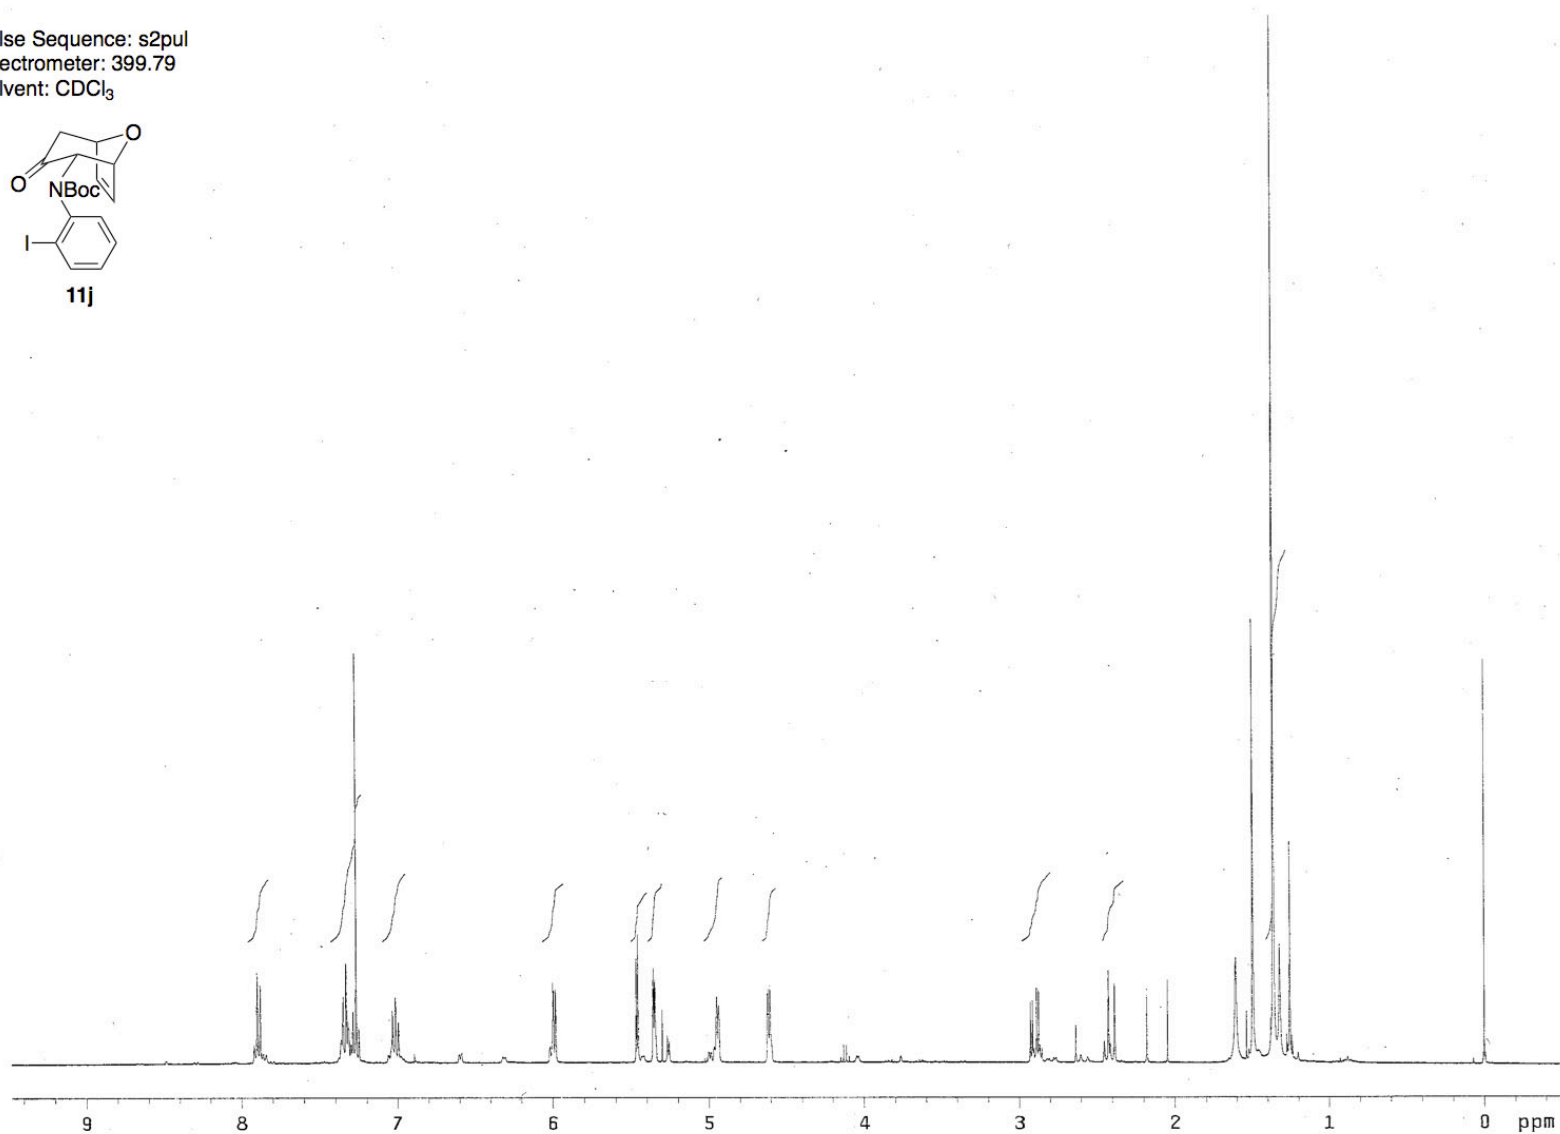

Pulse Sequence: s2pul  
Spectrometer: 100.53  
Solvent: CDCl<sub>3</sub>

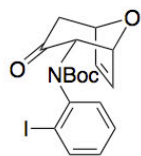

**11j**

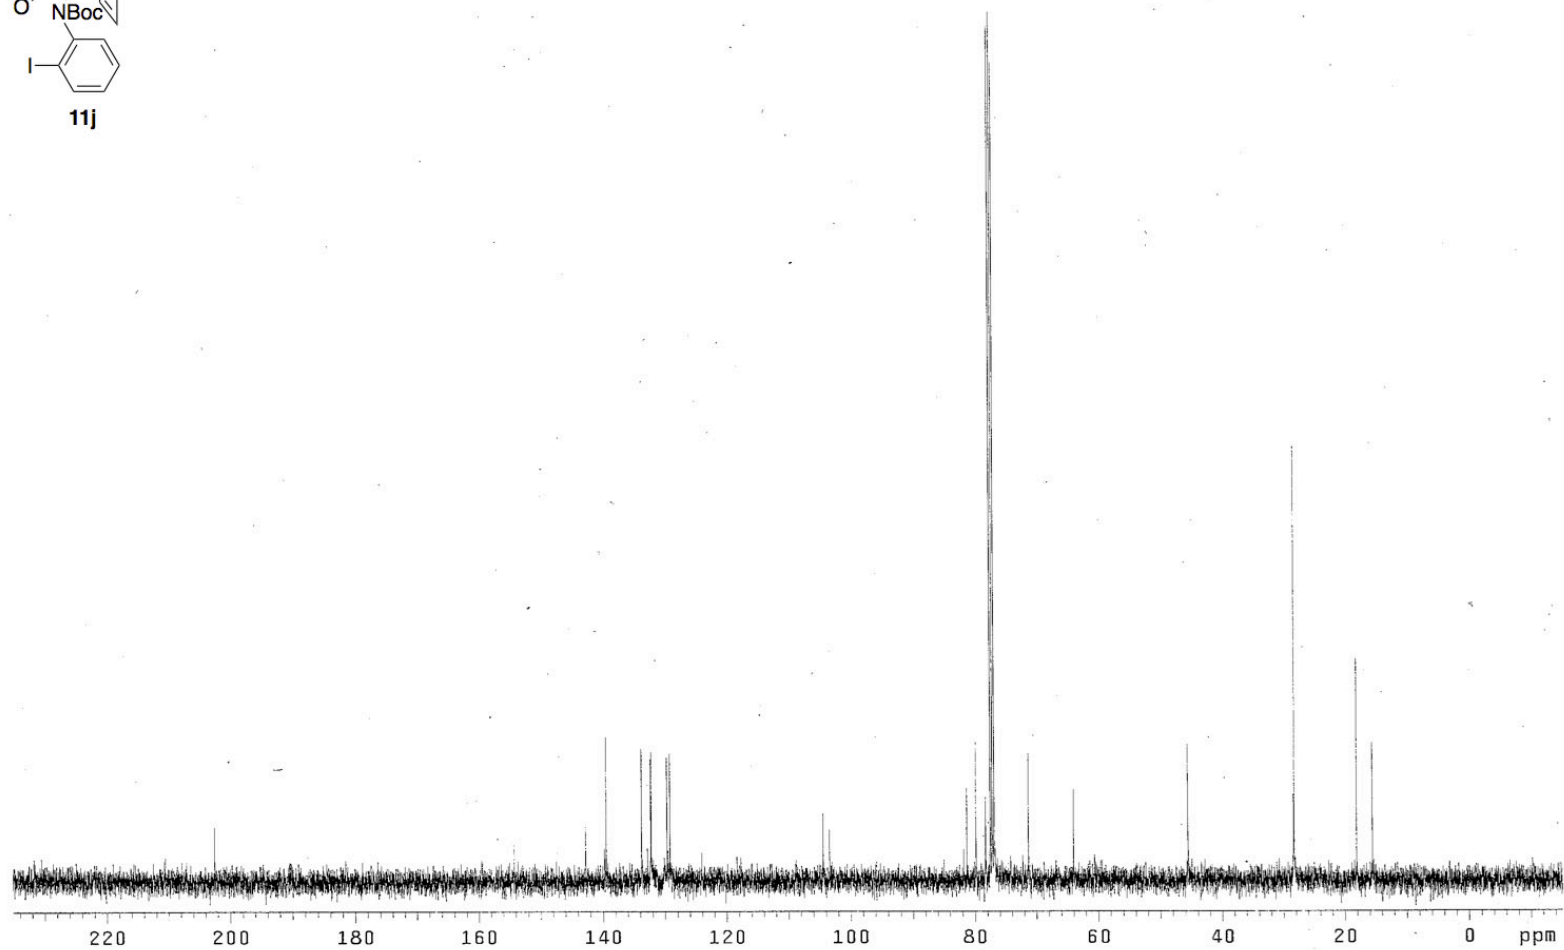



Pulse Sequence: s2pul  
Spectrometer: 399.79  
Solvent: CDCl<sub>3</sub>

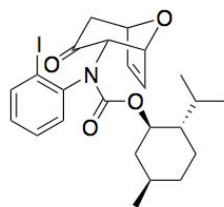

11k

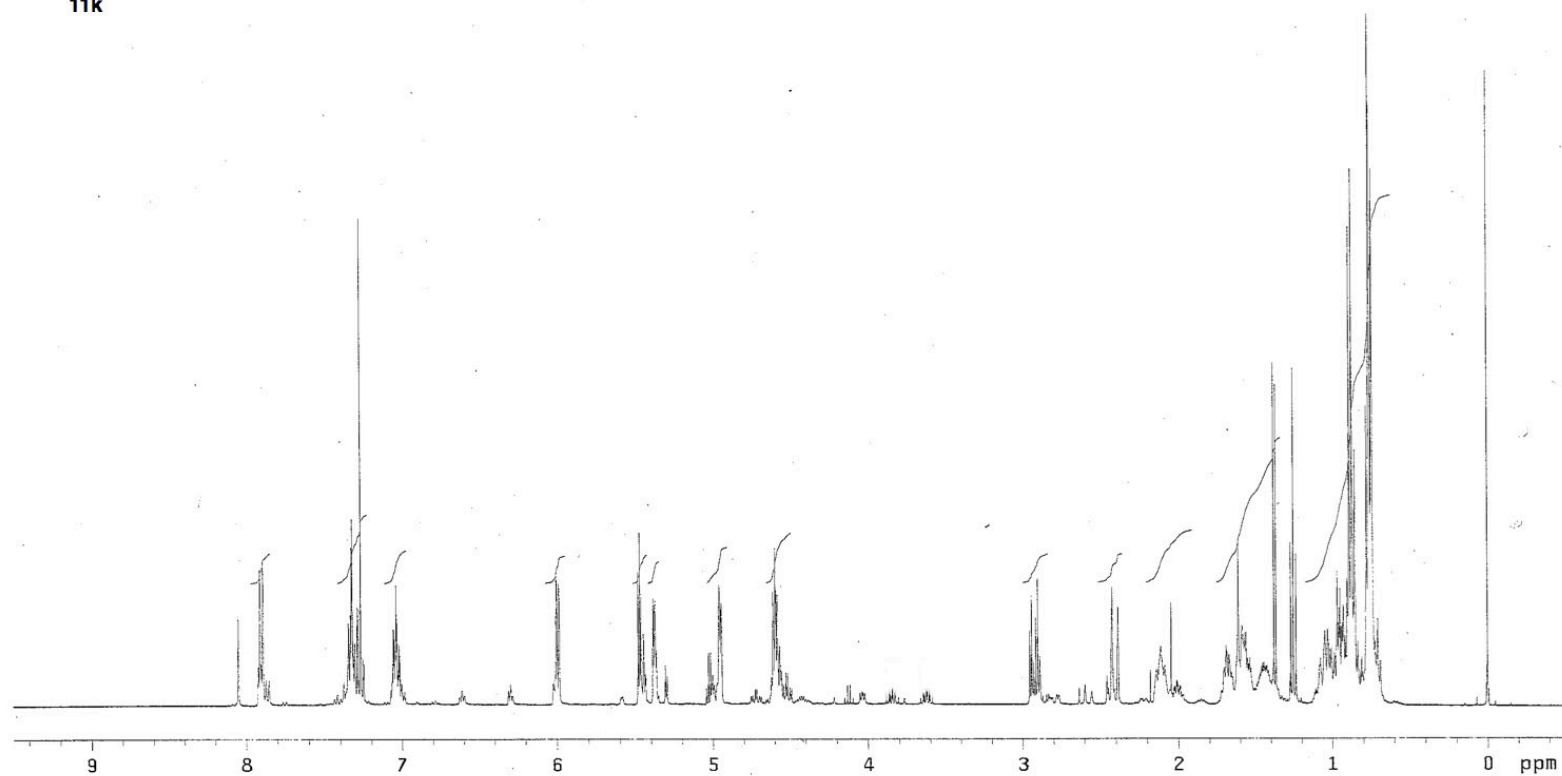

Pulse Sequence: s2pul  
Spectrometer: 100.53  
Solvent: CDCl<sub>3</sub>

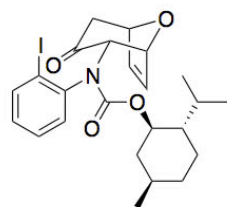

11k

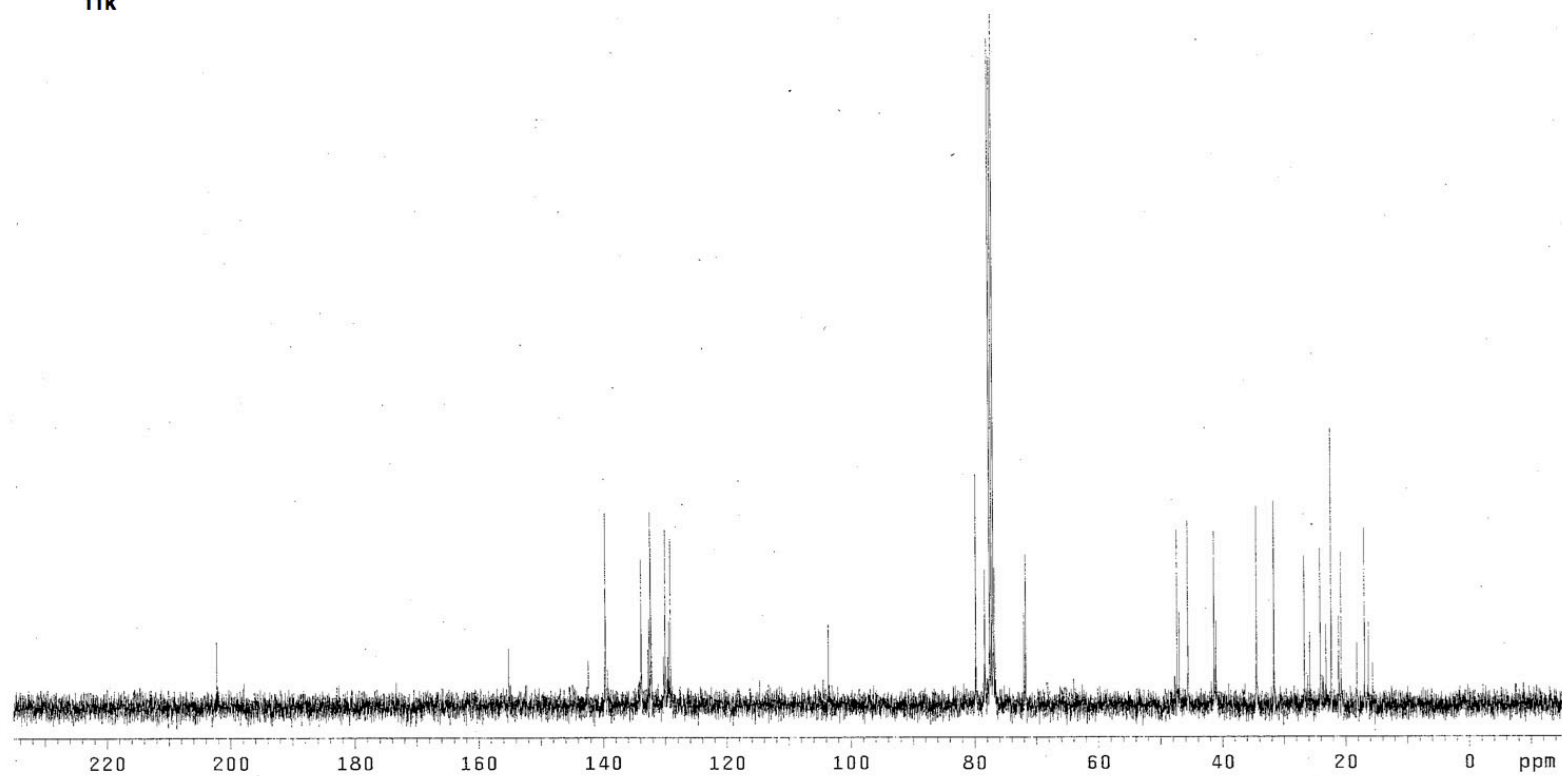

Pulse Sequence: s2pul  
Spectrometer: 499.73  
Solvent: CDCl<sub>3</sub>

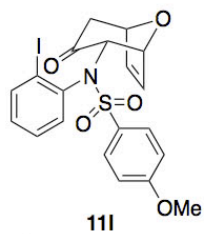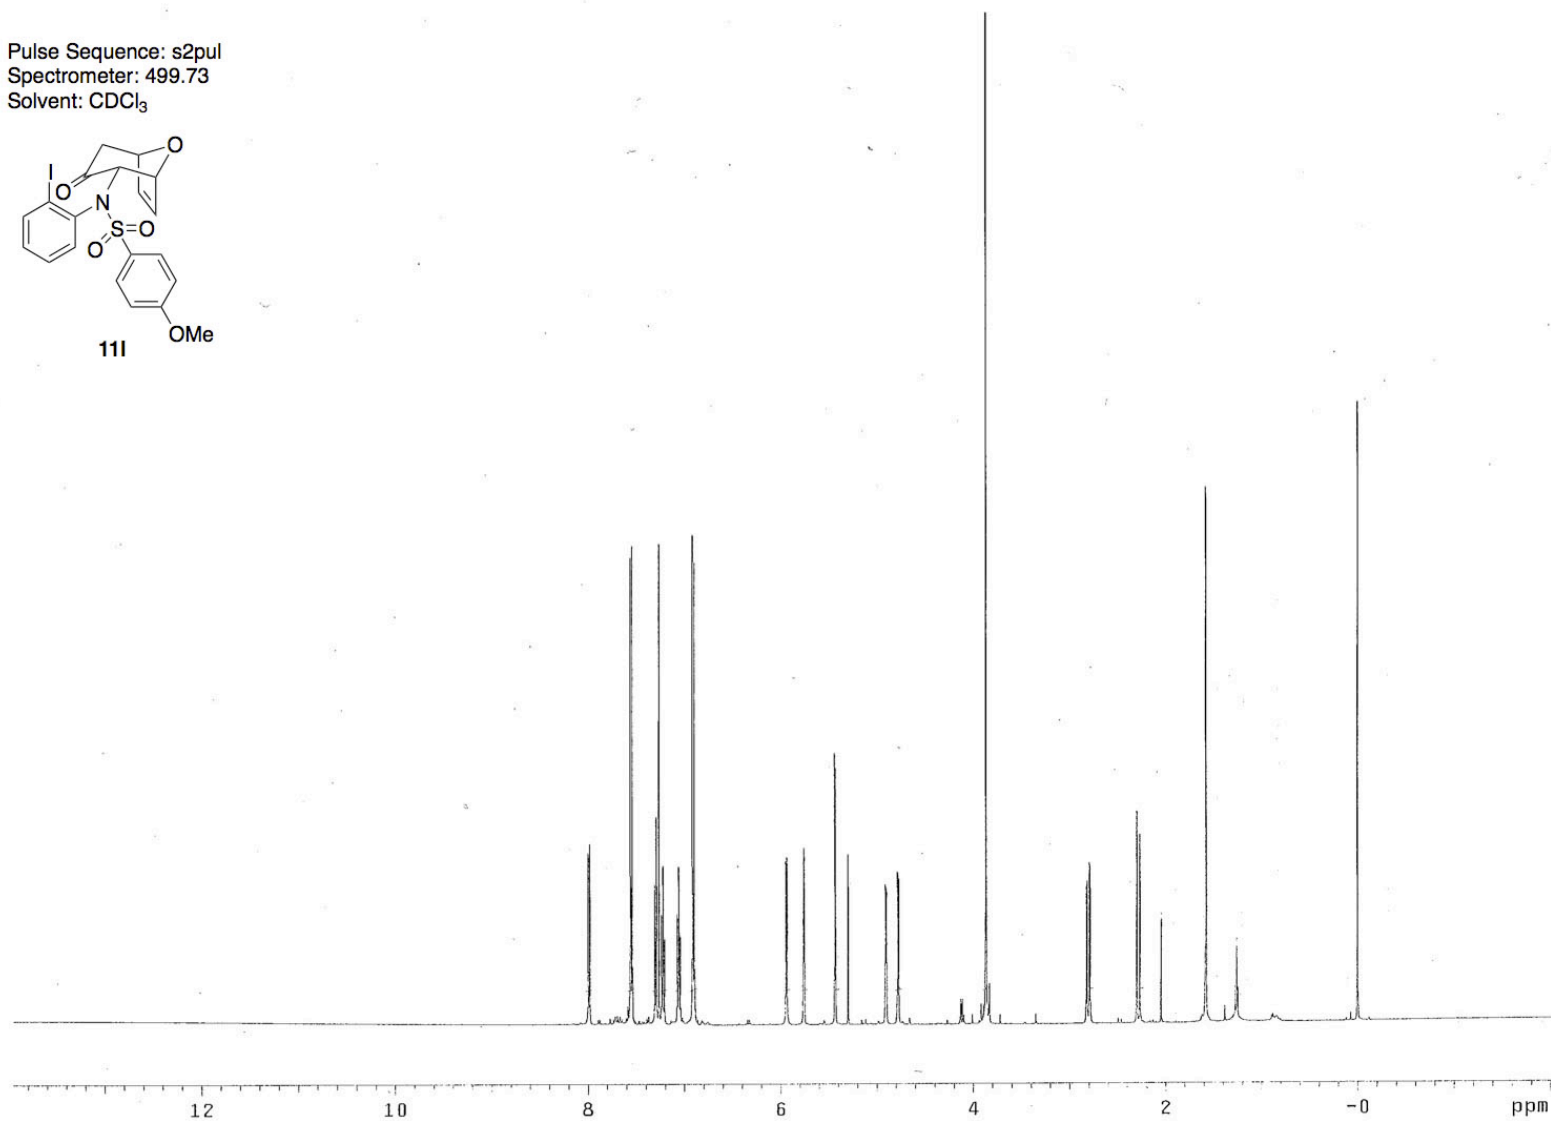

Pulse Sequence: s2pul  
Spectrometer: 125.66  
Solvent: CDCl<sub>3</sub>

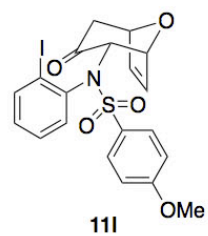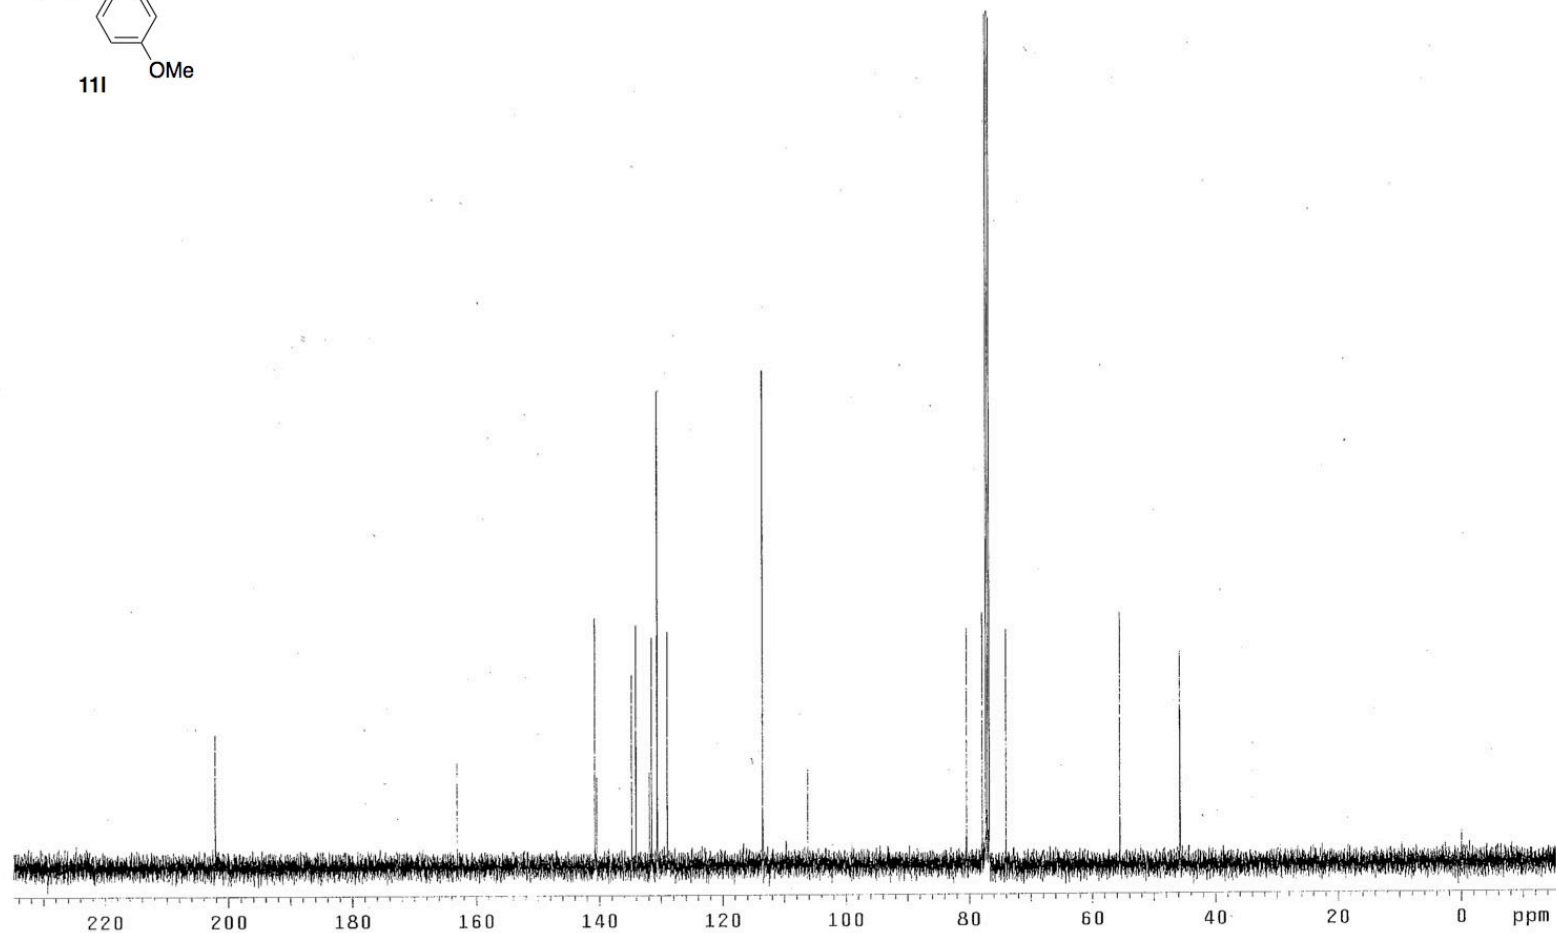

Pulse Sequence: s2pul  
Spectrometer: 399.79  
Solvent: CDCl<sub>3</sub>

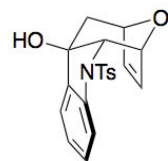

12a

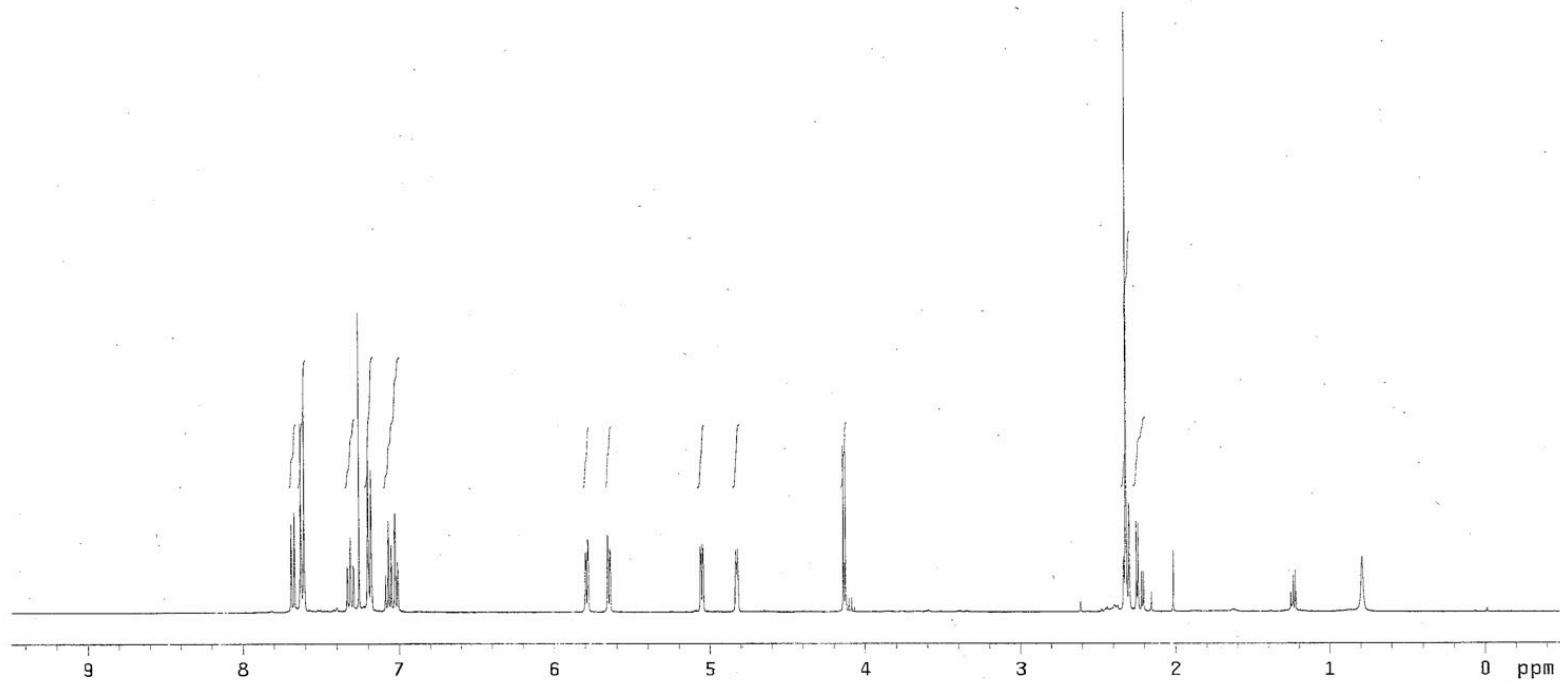

Pulse Sequence: s2pul  
Spectrometer: 100.53  
Solvent: CDCl<sub>3</sub>

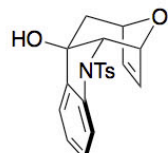

12a

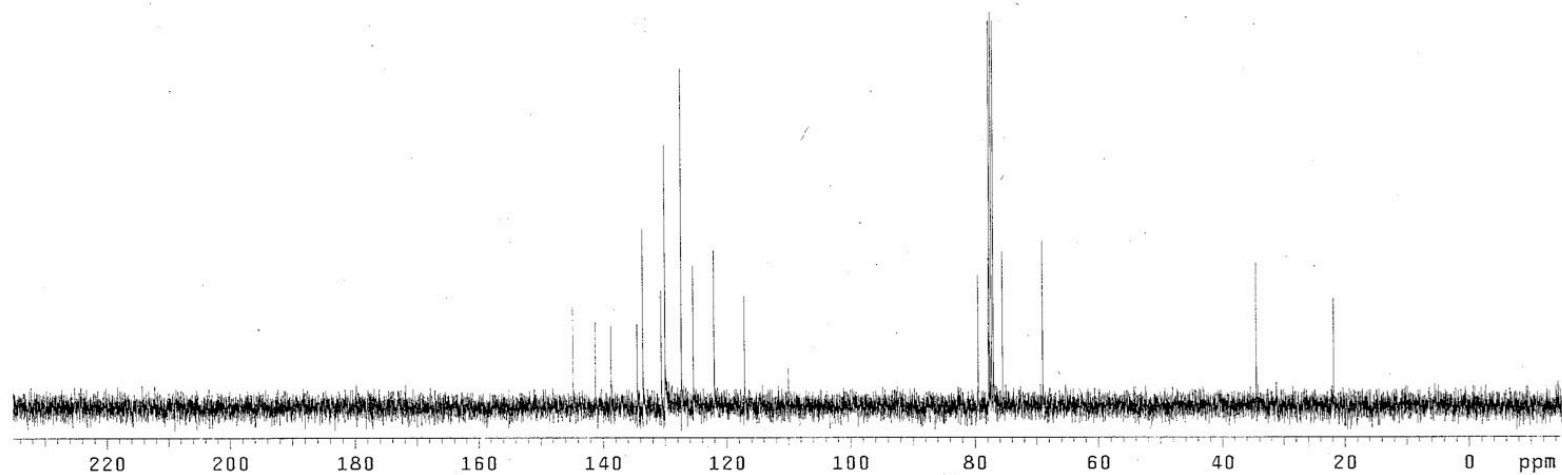

Pulse Sequence: gCOSY  
Solvent: CDCl3  
Temp. 25.0 C / 298.1 K  
File: gCOSY  
INOVA-500 "nmr03"

Relax. delay 1.000 sec  
Acq. time 0.160 sec  
Width 6387.7 Hz  
2D Width 6387.7 Hz  
2 repetitions  
256 increments  
OBSERVE H1, 399.7865251 MHz  
DATA PROCESSING  
Sq. sine bell 0.080 sec  
F1 DATA PROCESSING  
Sq. sine bell 0.040 sec  
FT size 4096 x 4096  
Total time 10 min, 29 sec

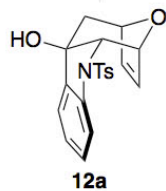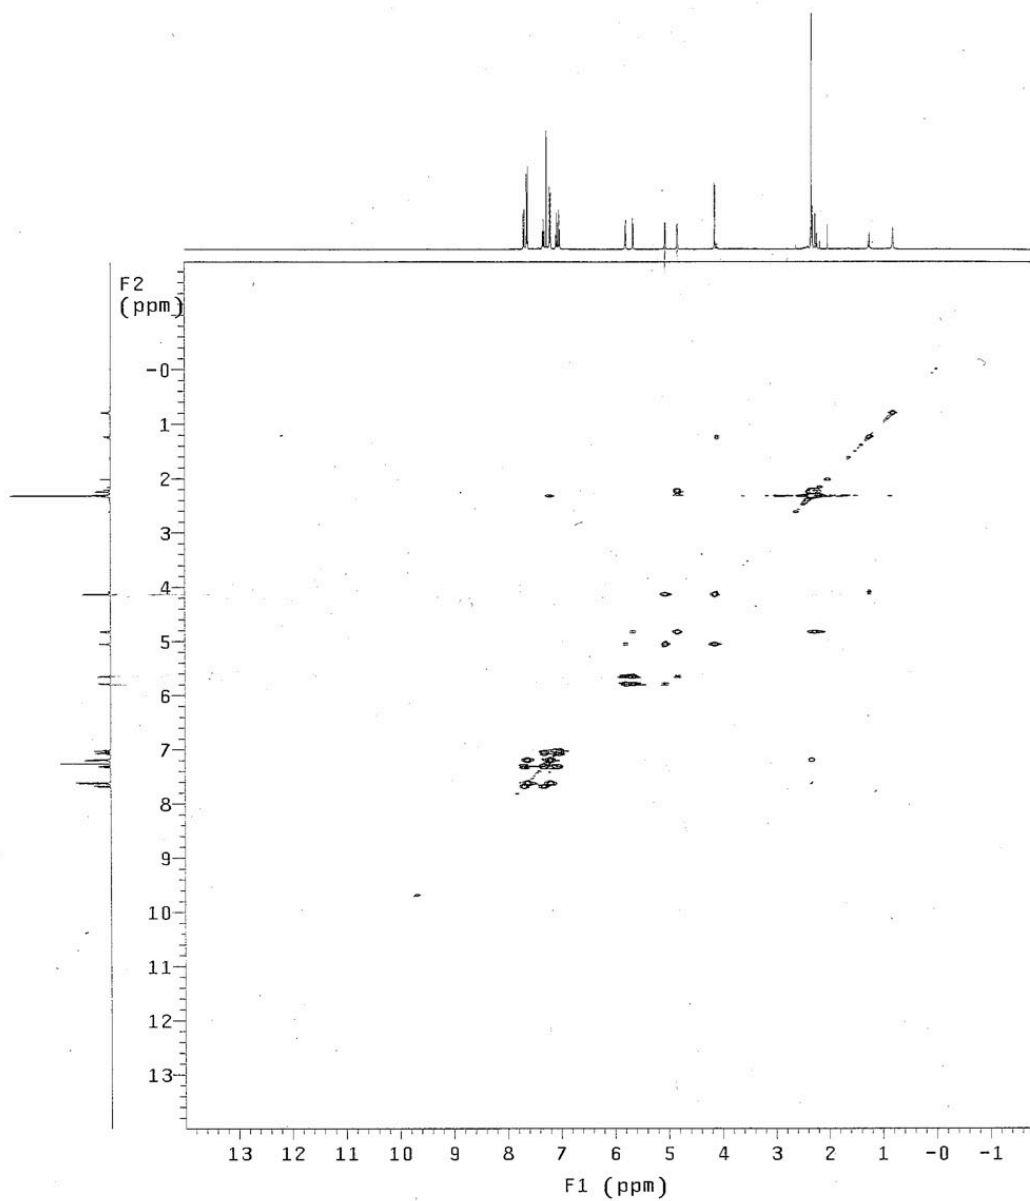

Pulse Sequence: gHSQC

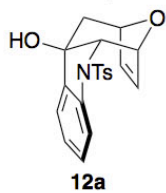

12a

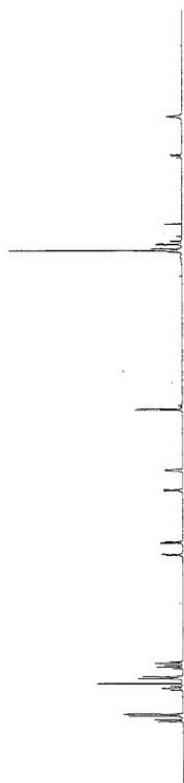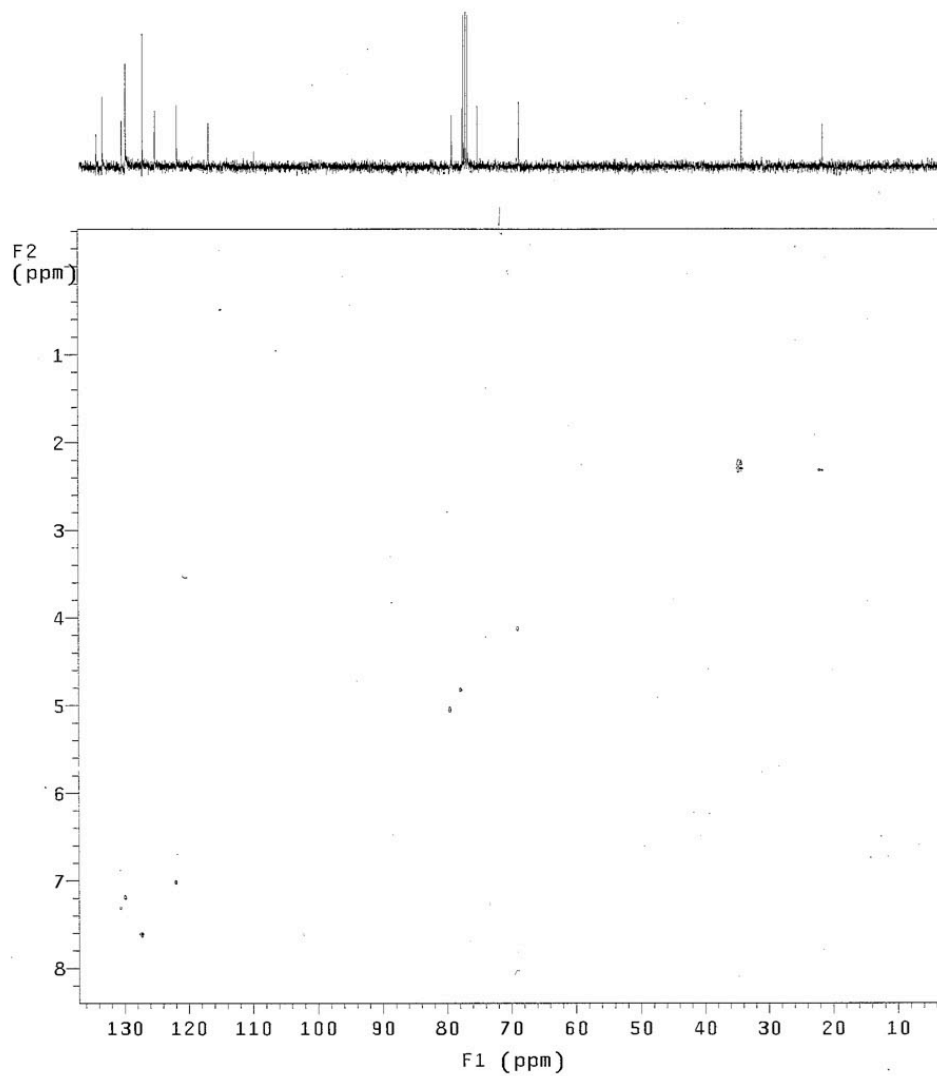



Pulse Sequence: s2pul  
Spectrometer: 399.79  
Solvent: CDCl<sub>3</sub>

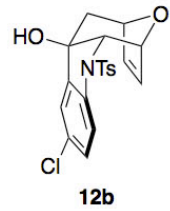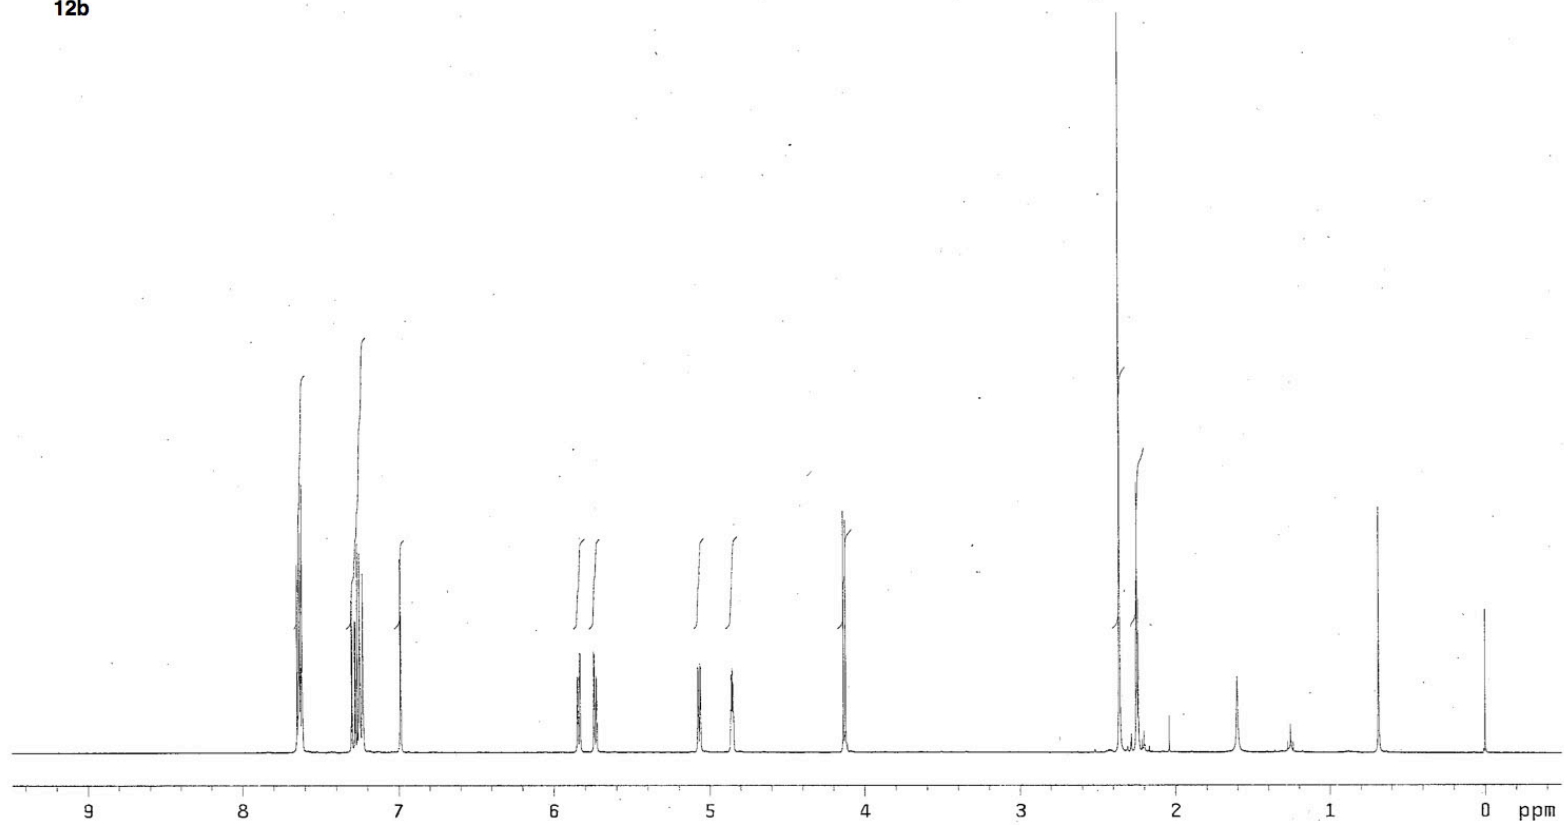

Pulse Sequence: s2pul  
Spectrometer: 100.53  
Solvent: CDCl<sub>3</sub>

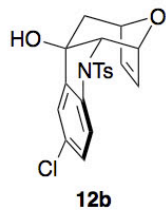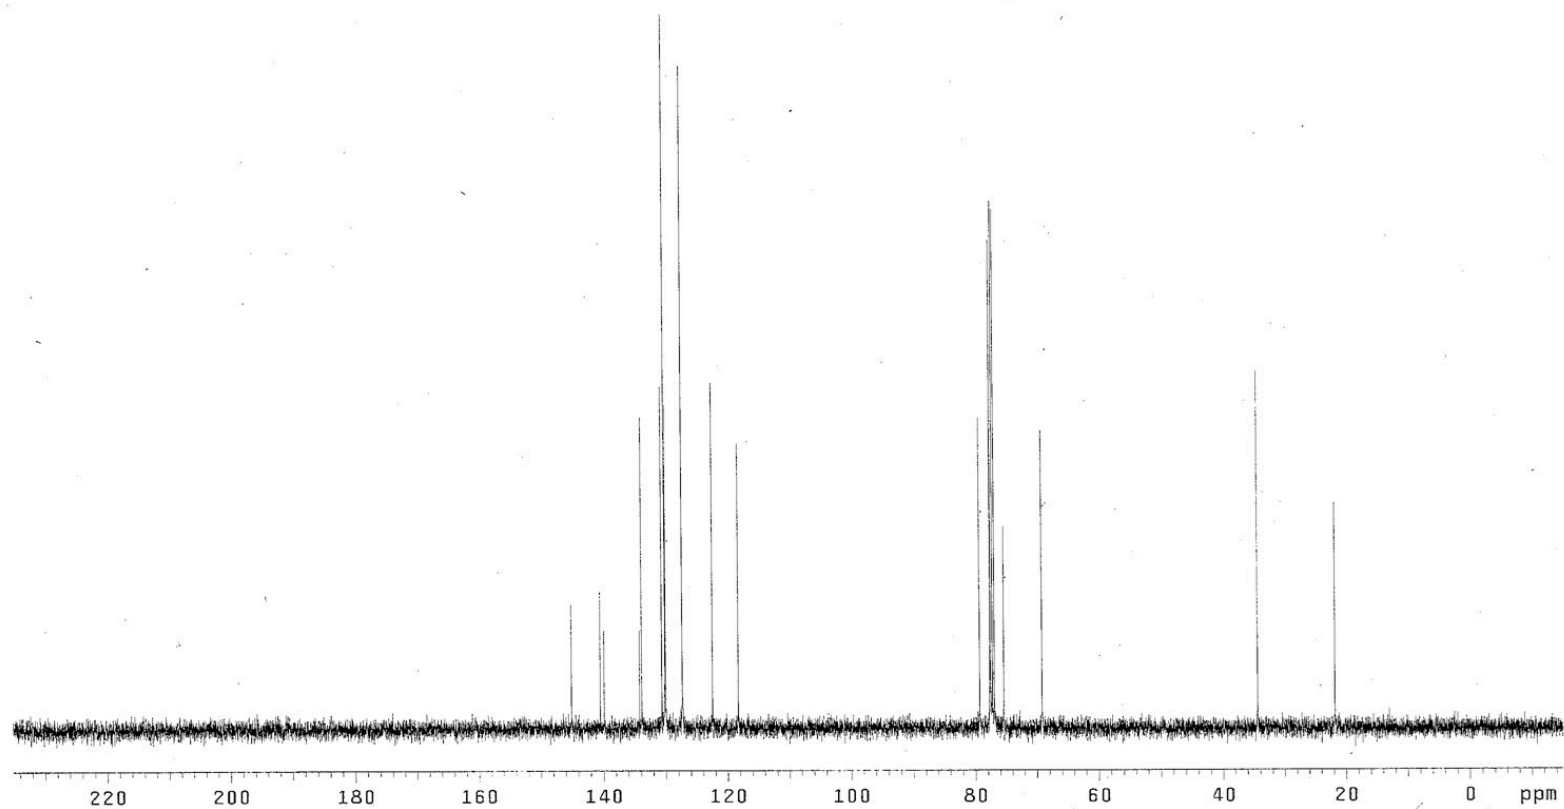

Pulse Sequence: s2pul  
Spectrometer: 399.79  
Solvent: CDCl<sub>3</sub>

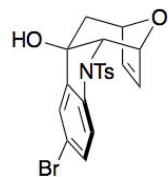

12c

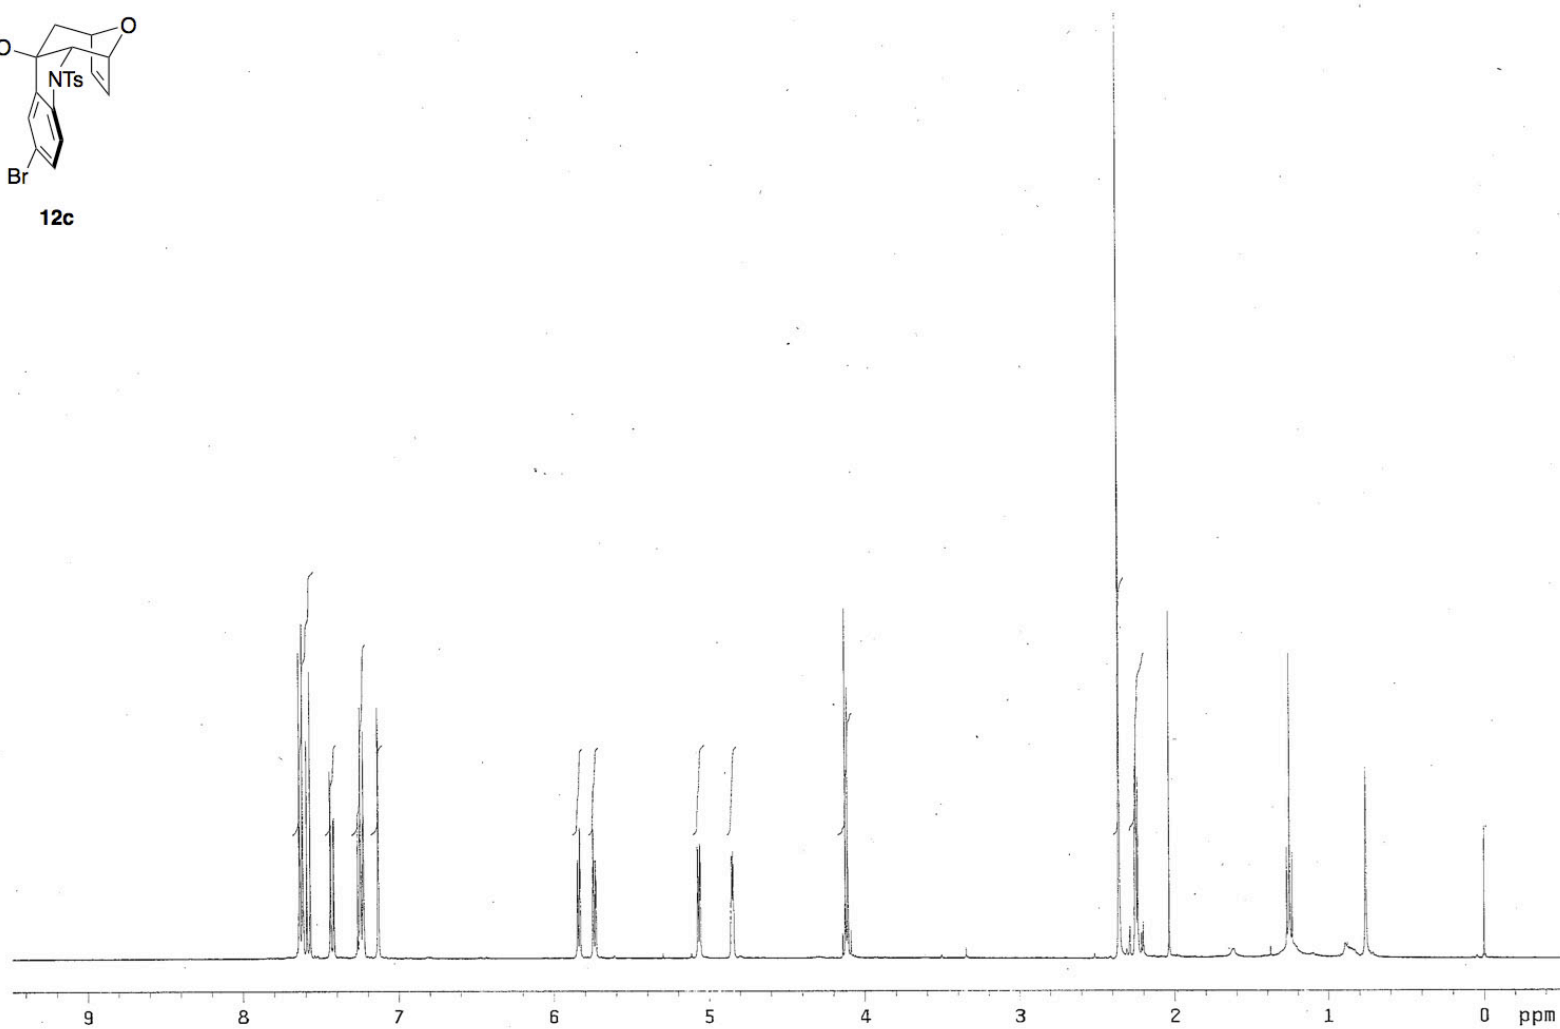

Pulse Sequence: s2pul  
Spectrometer: 100.53  
Solvent: CDCl<sub>3</sub>

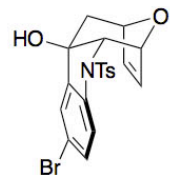

**12c**

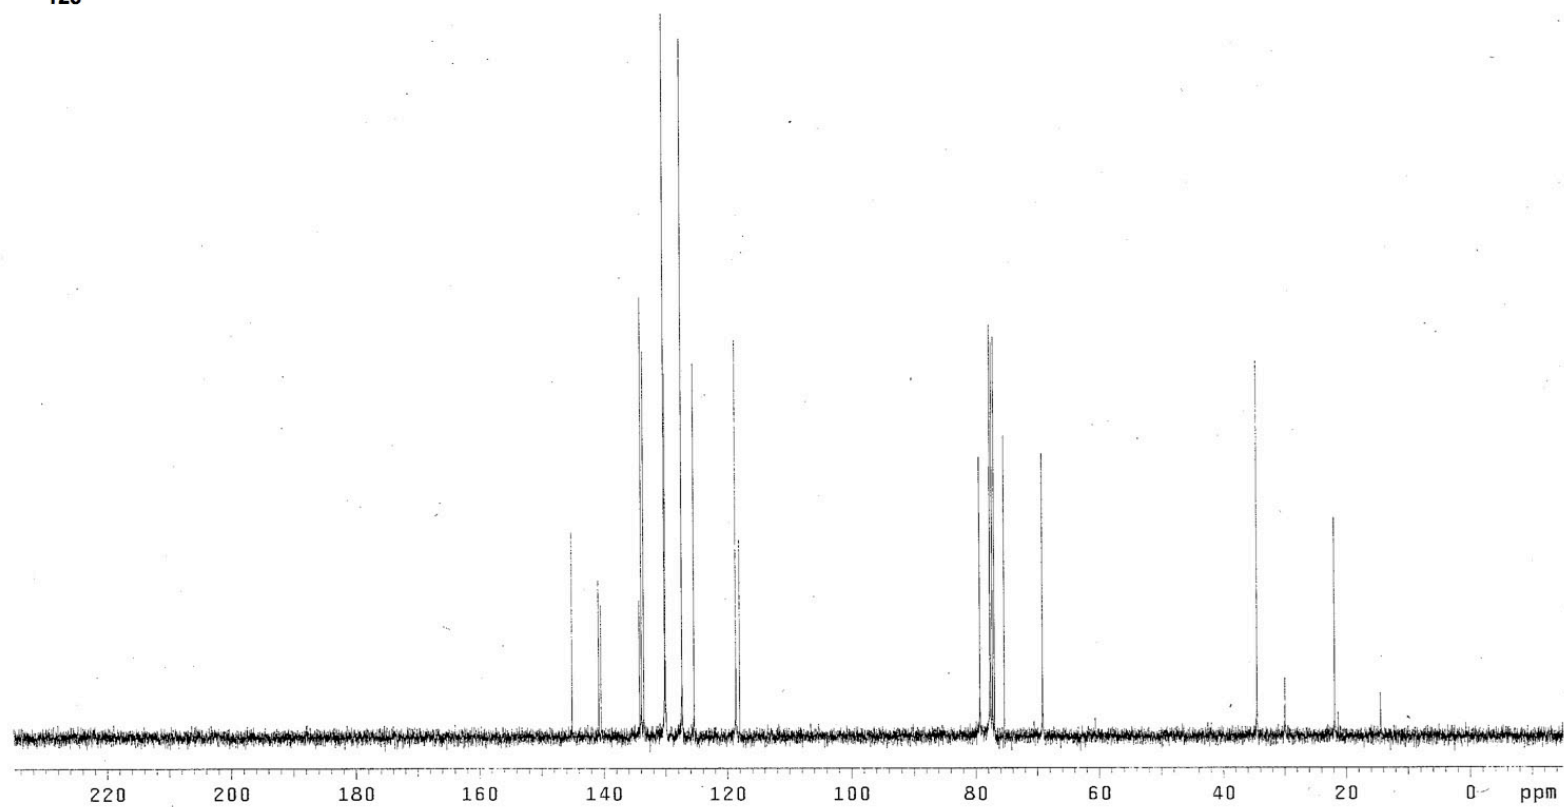

Pulse Sequence: s2pul  
Spectrometer: 399.79  
Solvent: CDCl<sub>3</sub>

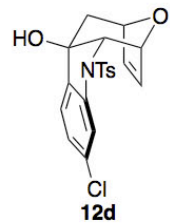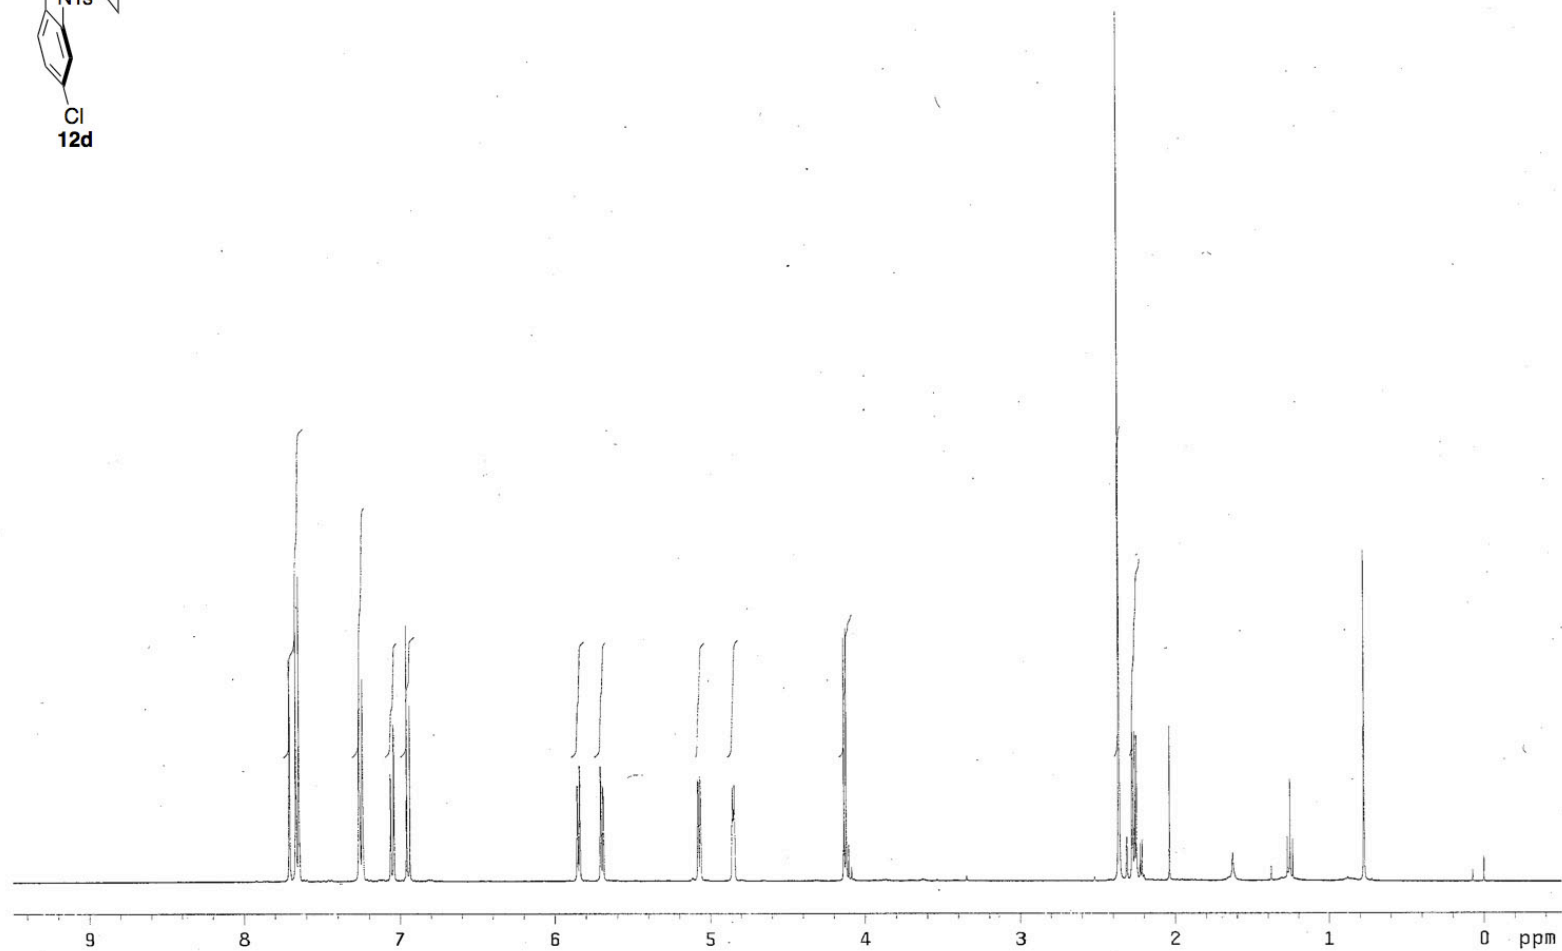

Pulse Sequence: s2pul  
Spectrometer: 100.53  
Solvent: CDCl<sub>3</sub>

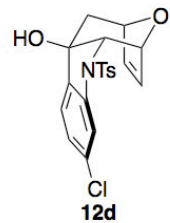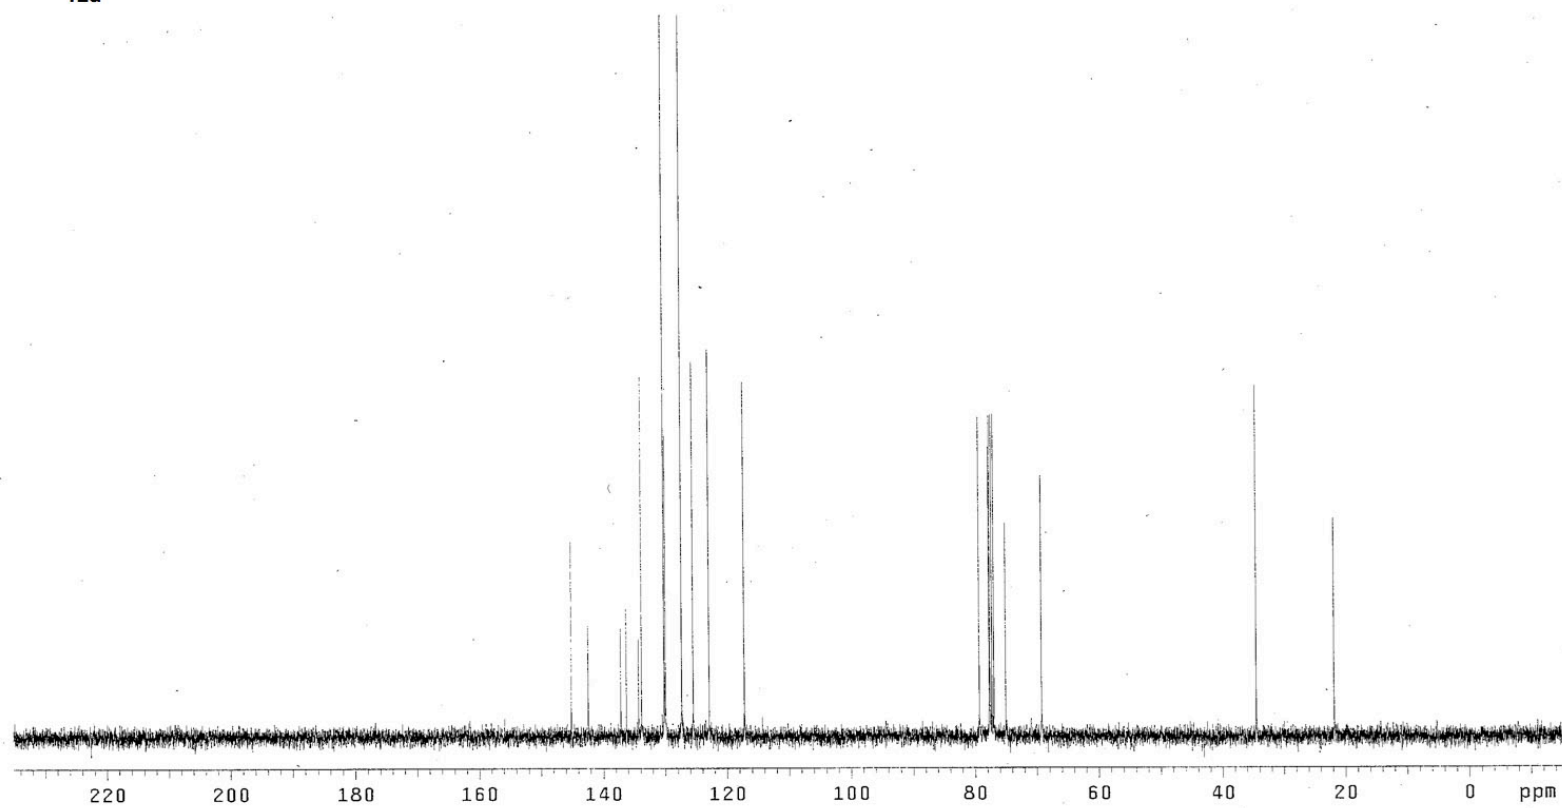

Pulse Sequence: s2pul  
Spectrometer: 399.79  
Solvent: CDCl<sub>3</sub>

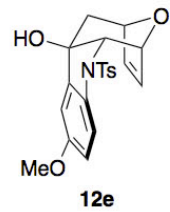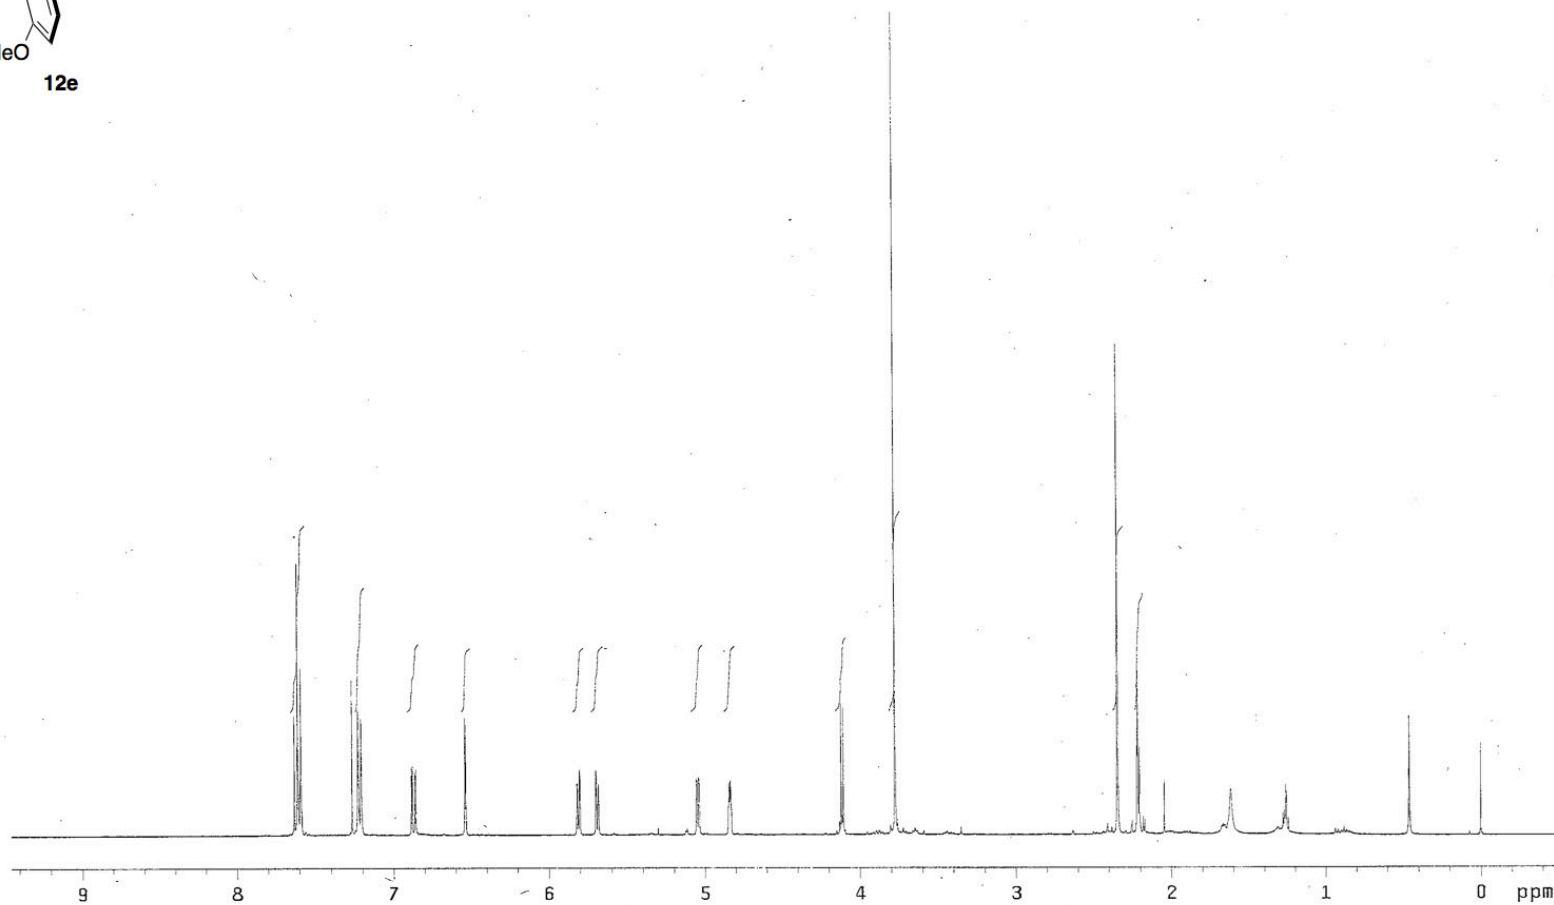

Pulse Sequence: s2pul  
Spectrometer: 100.53  
Solvent: CDCl<sub>3</sub>

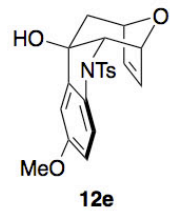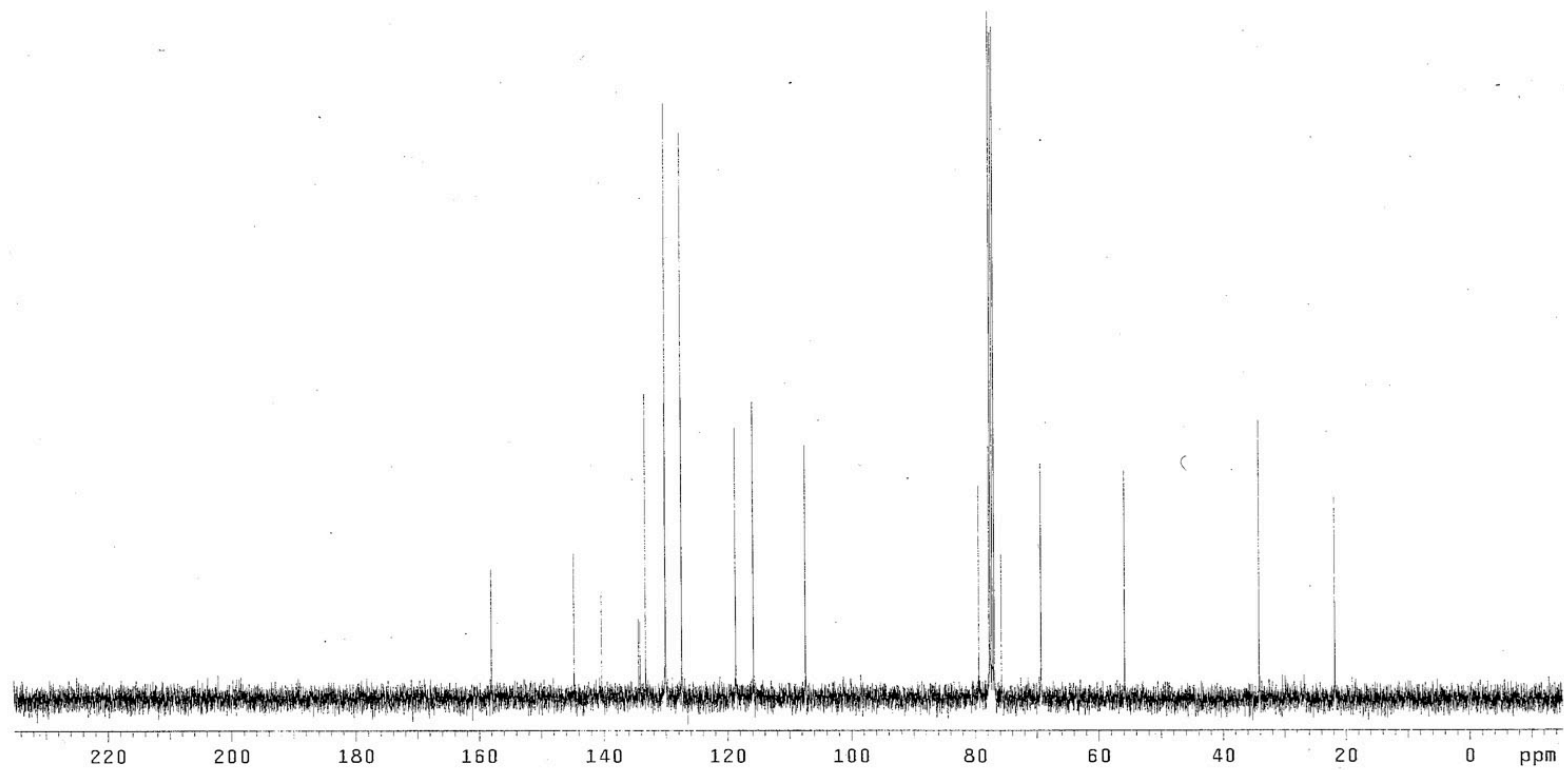



Pulse Sequence: s2pul  
Spectrometer: 399.79  
Solvent: CDCl<sub>3</sub>

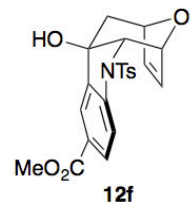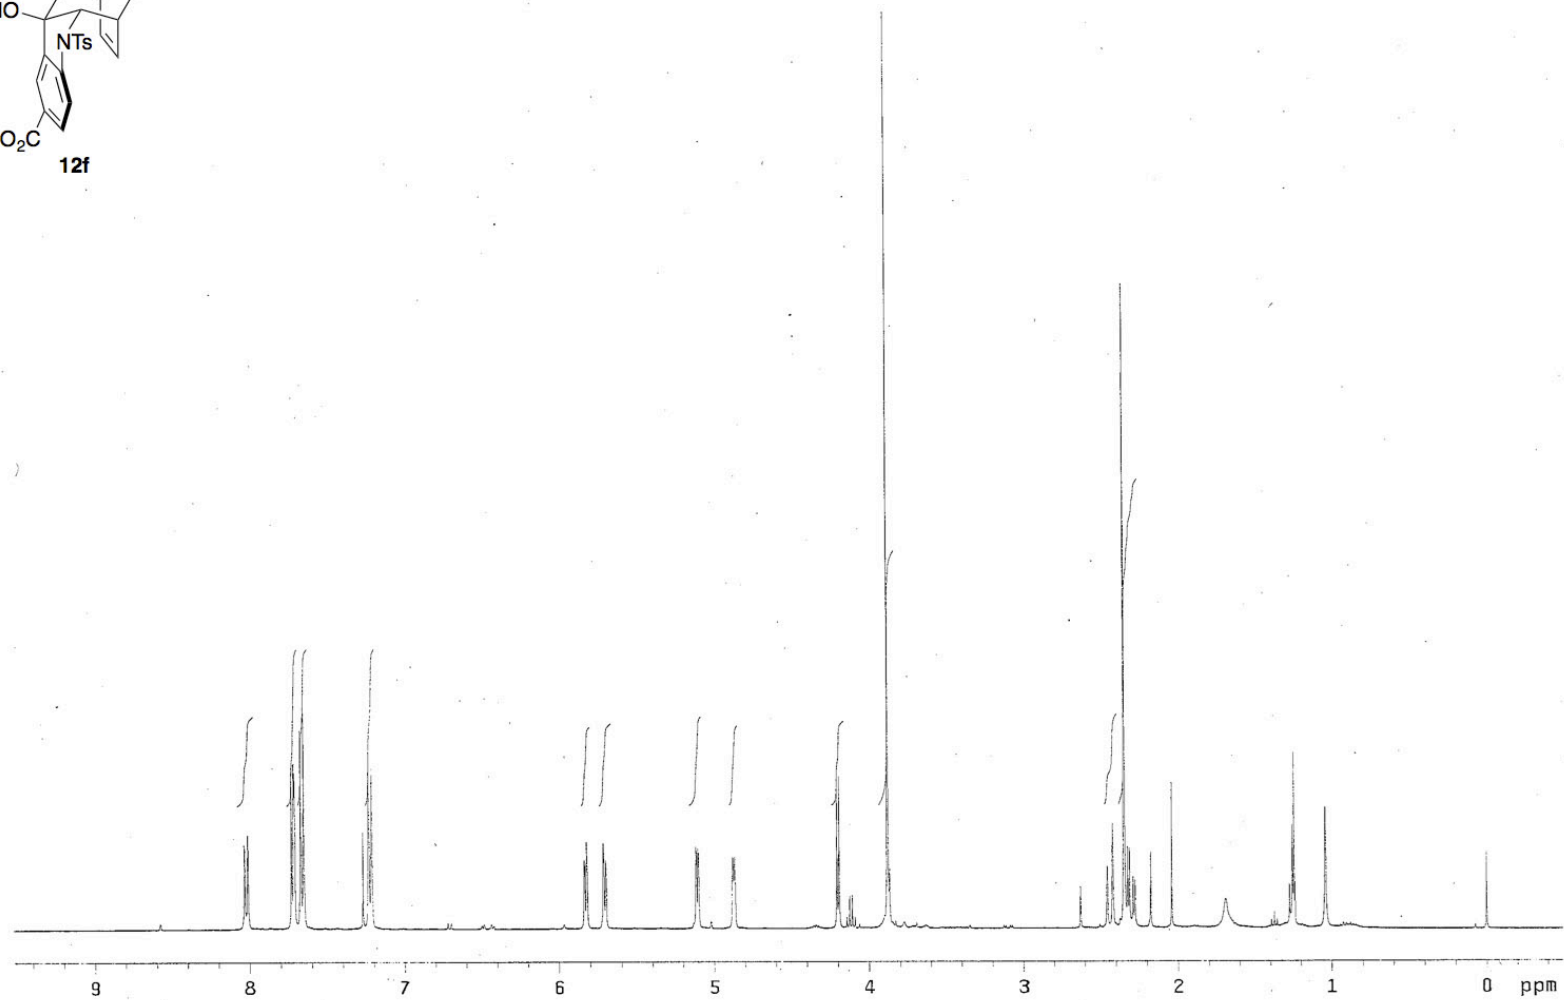

Pulse Sequence: s2pul  
Spectrometer: 100.53  
Solvent: CDCl<sub>3</sub>

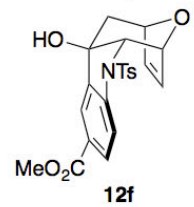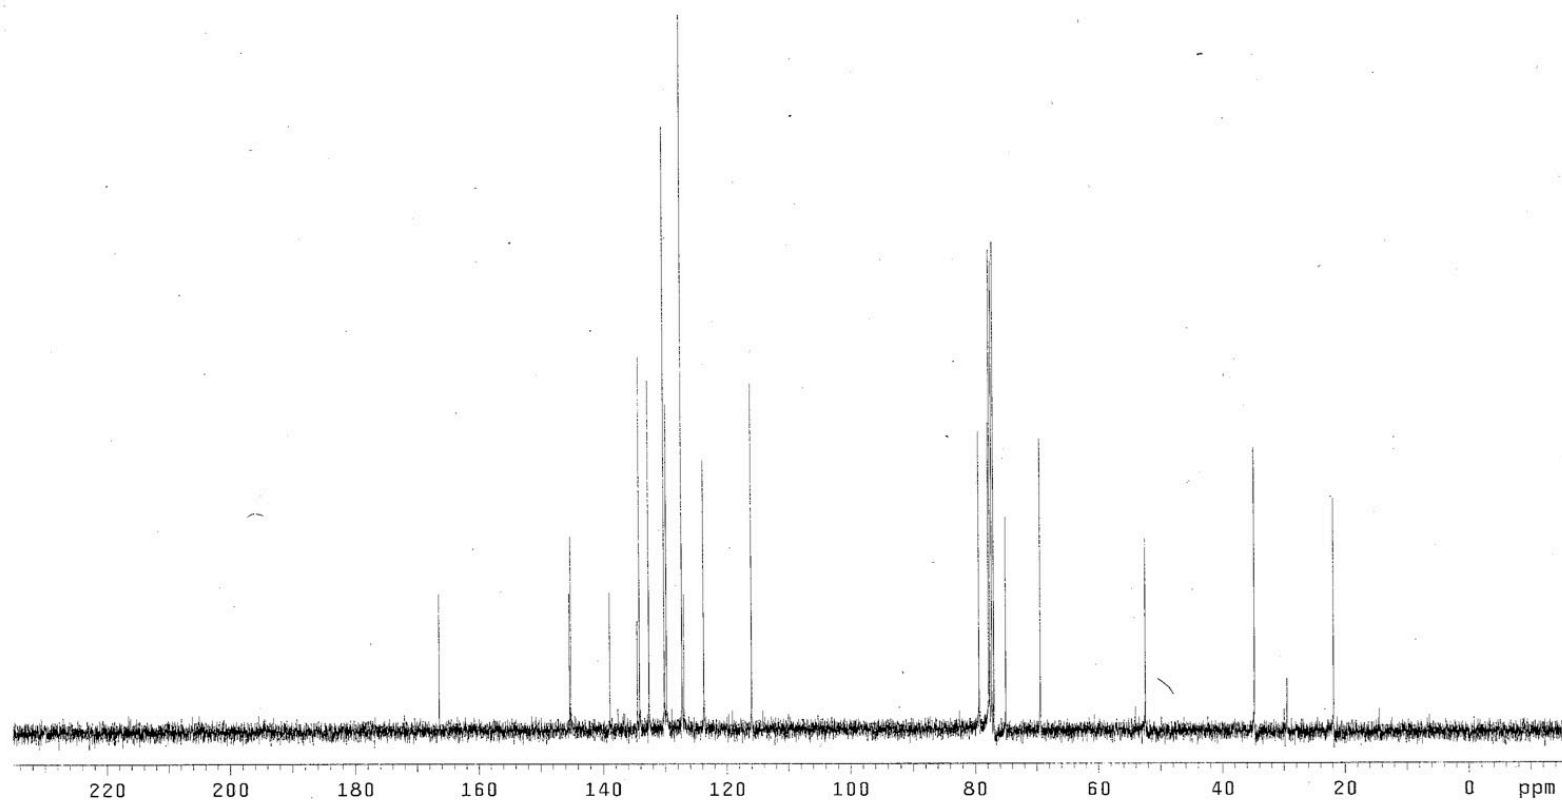

Pulse Sequence: s2pul  
Spectrometer: 399.79  
Solvent: CDCl<sub>3</sub>

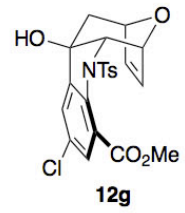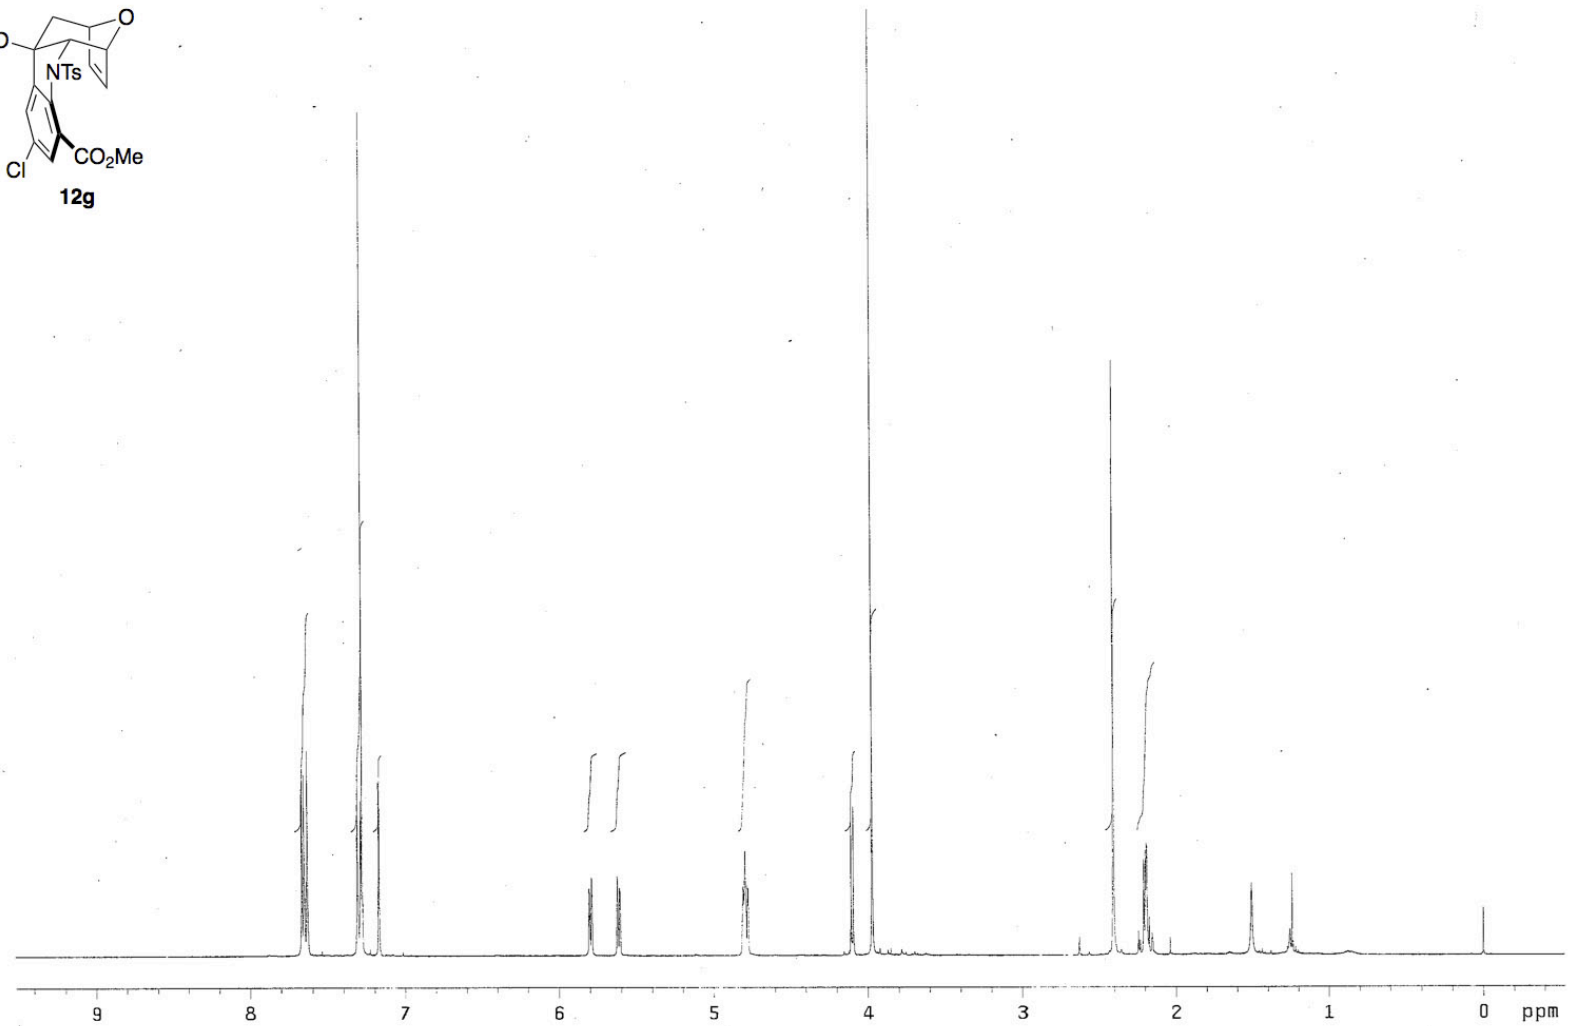

Pulse Sequence: s2pul  
Spectrometer: 100.53  
Solvent: CDCl<sub>3</sub>

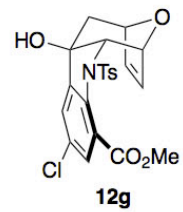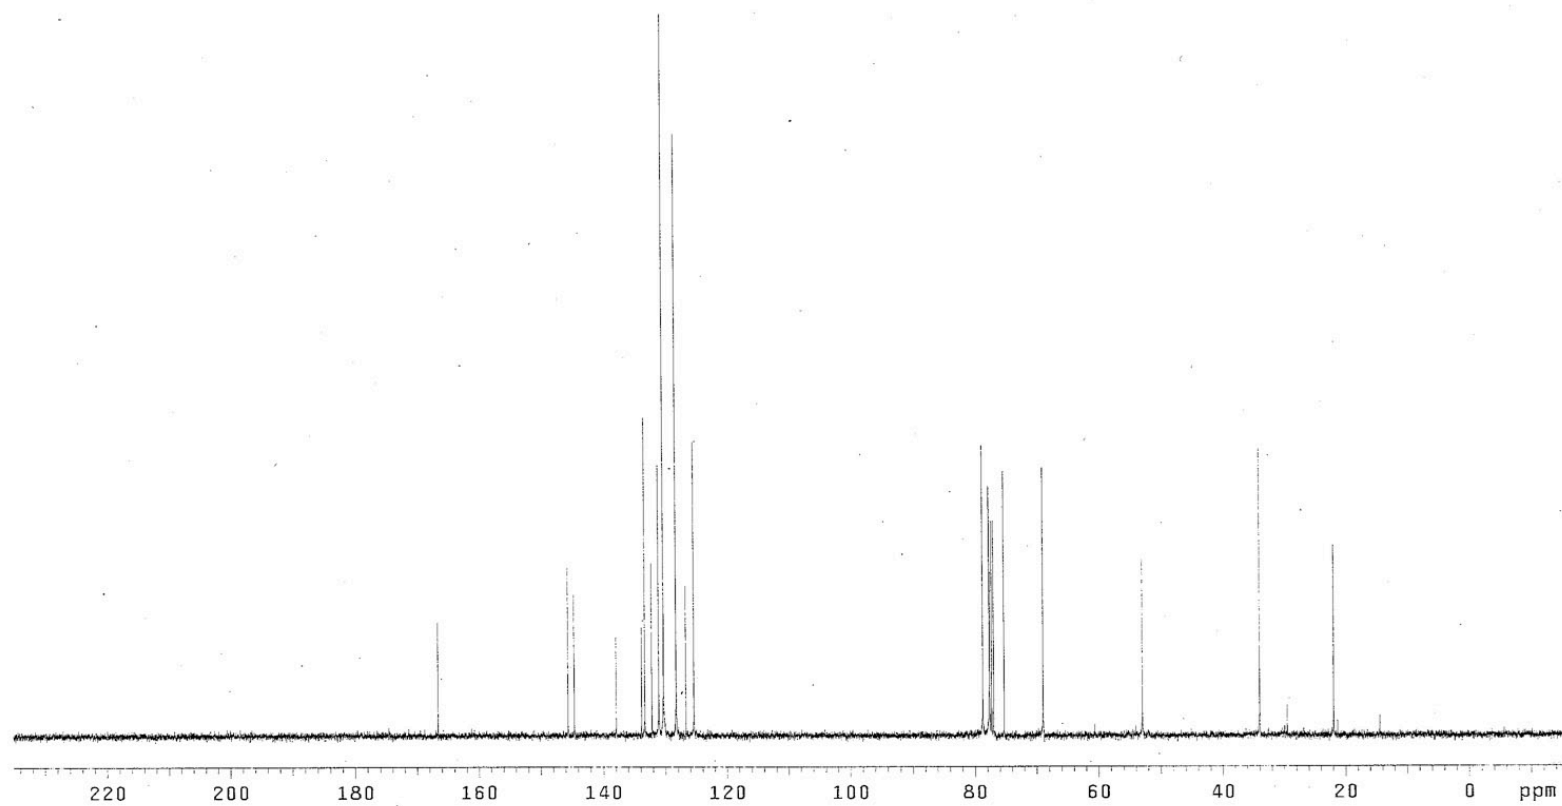

Pulse Sequence: s2pul  
Spectrometer: 399.79  
Solvent: CDCl<sub>3</sub>

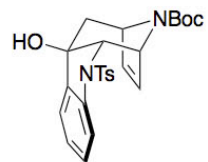

12h

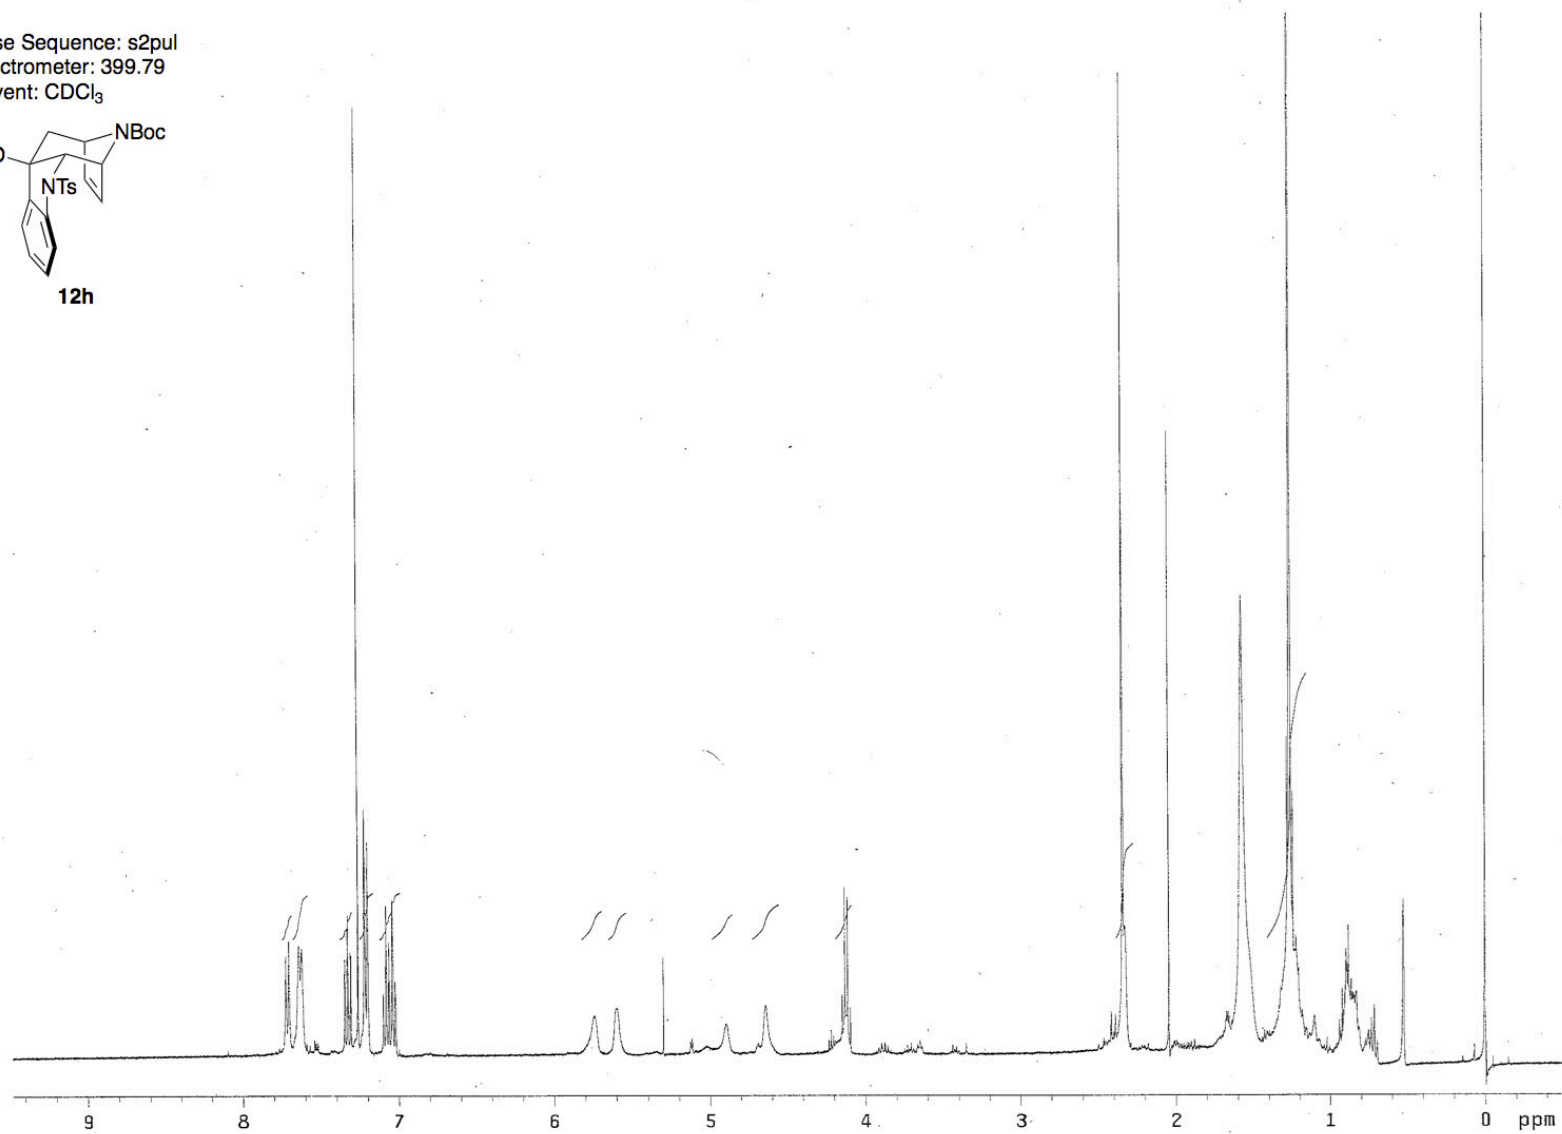

Pulse Sequence: s2pul  
Spectrometer: 100.53  
Solvent: CDCl<sub>3</sub>

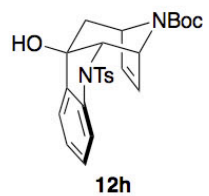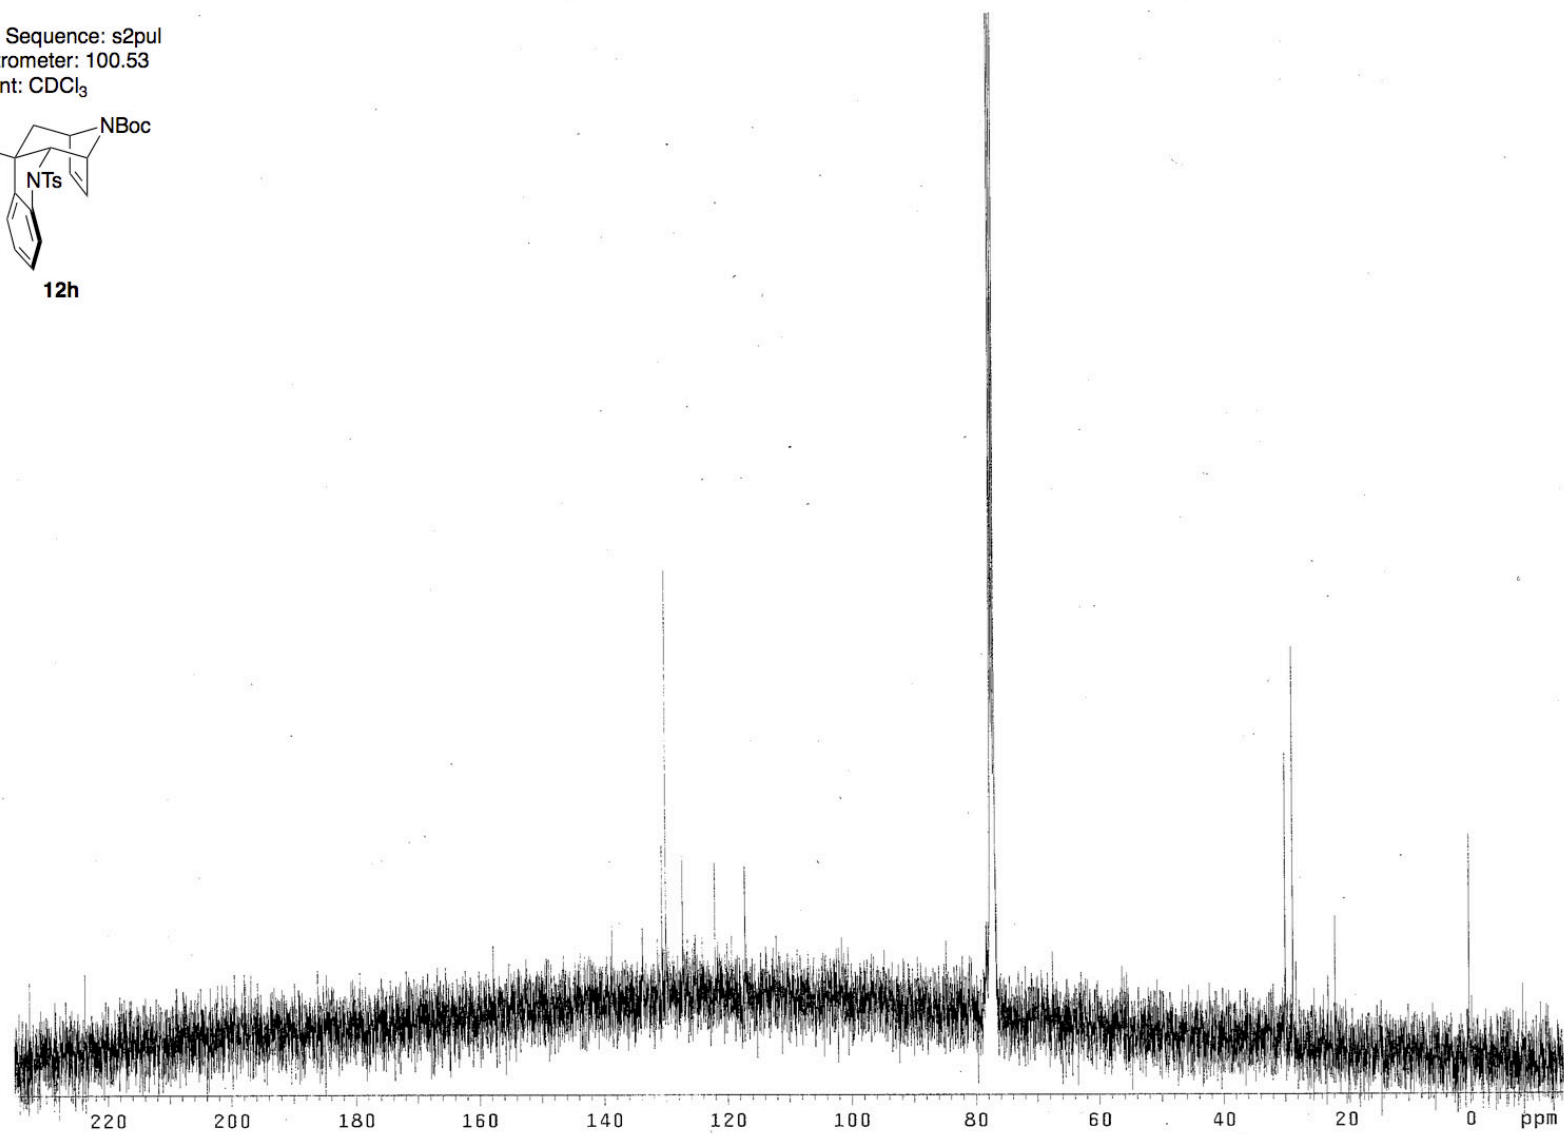

Pulse Sequence: s2pul  
Spectrometer: 399.79  
Solvent: CDCl<sub>3</sub>

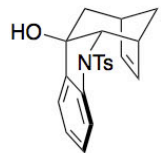

12i

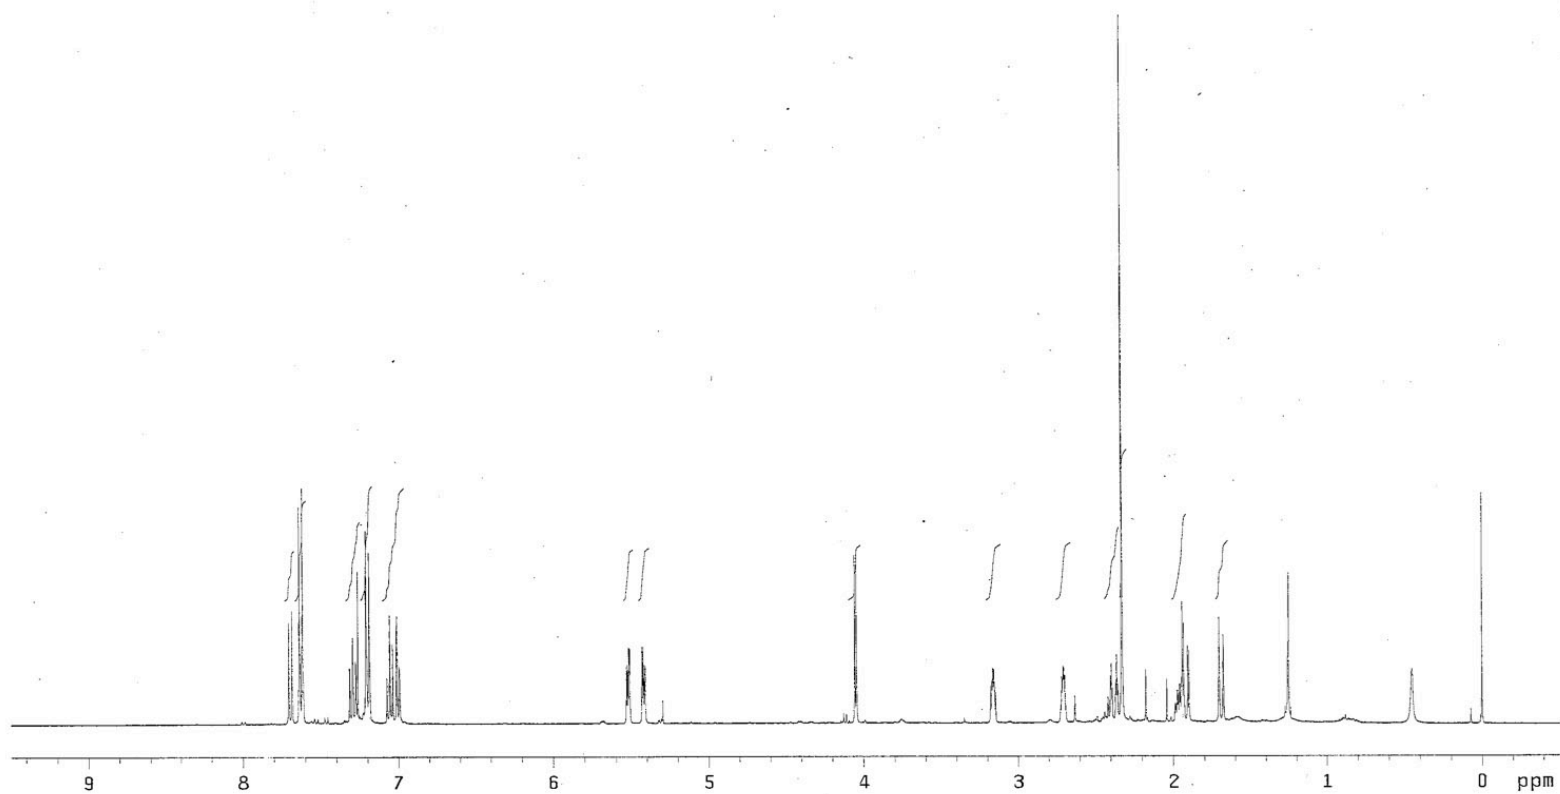

Pulse Sequence: s2pul  
Spectrometer: 100.53  
Solvent: CDCl<sub>3</sub>

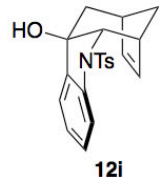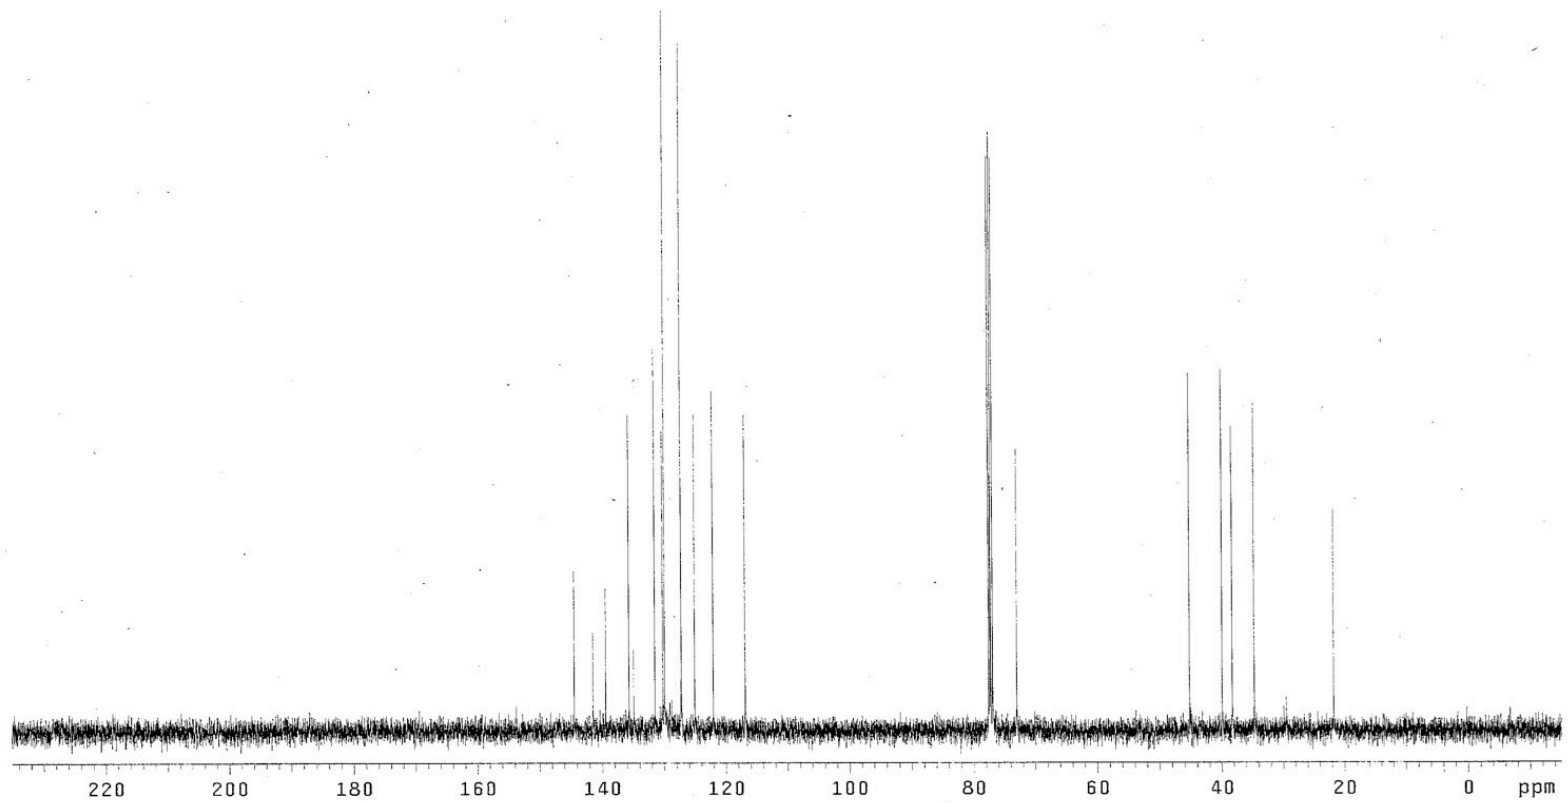



Pulse Sequence: s2pul  
Spectrometer: 399.79  
Solvent: CDCl<sub>3</sub>

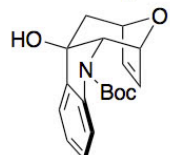

12j

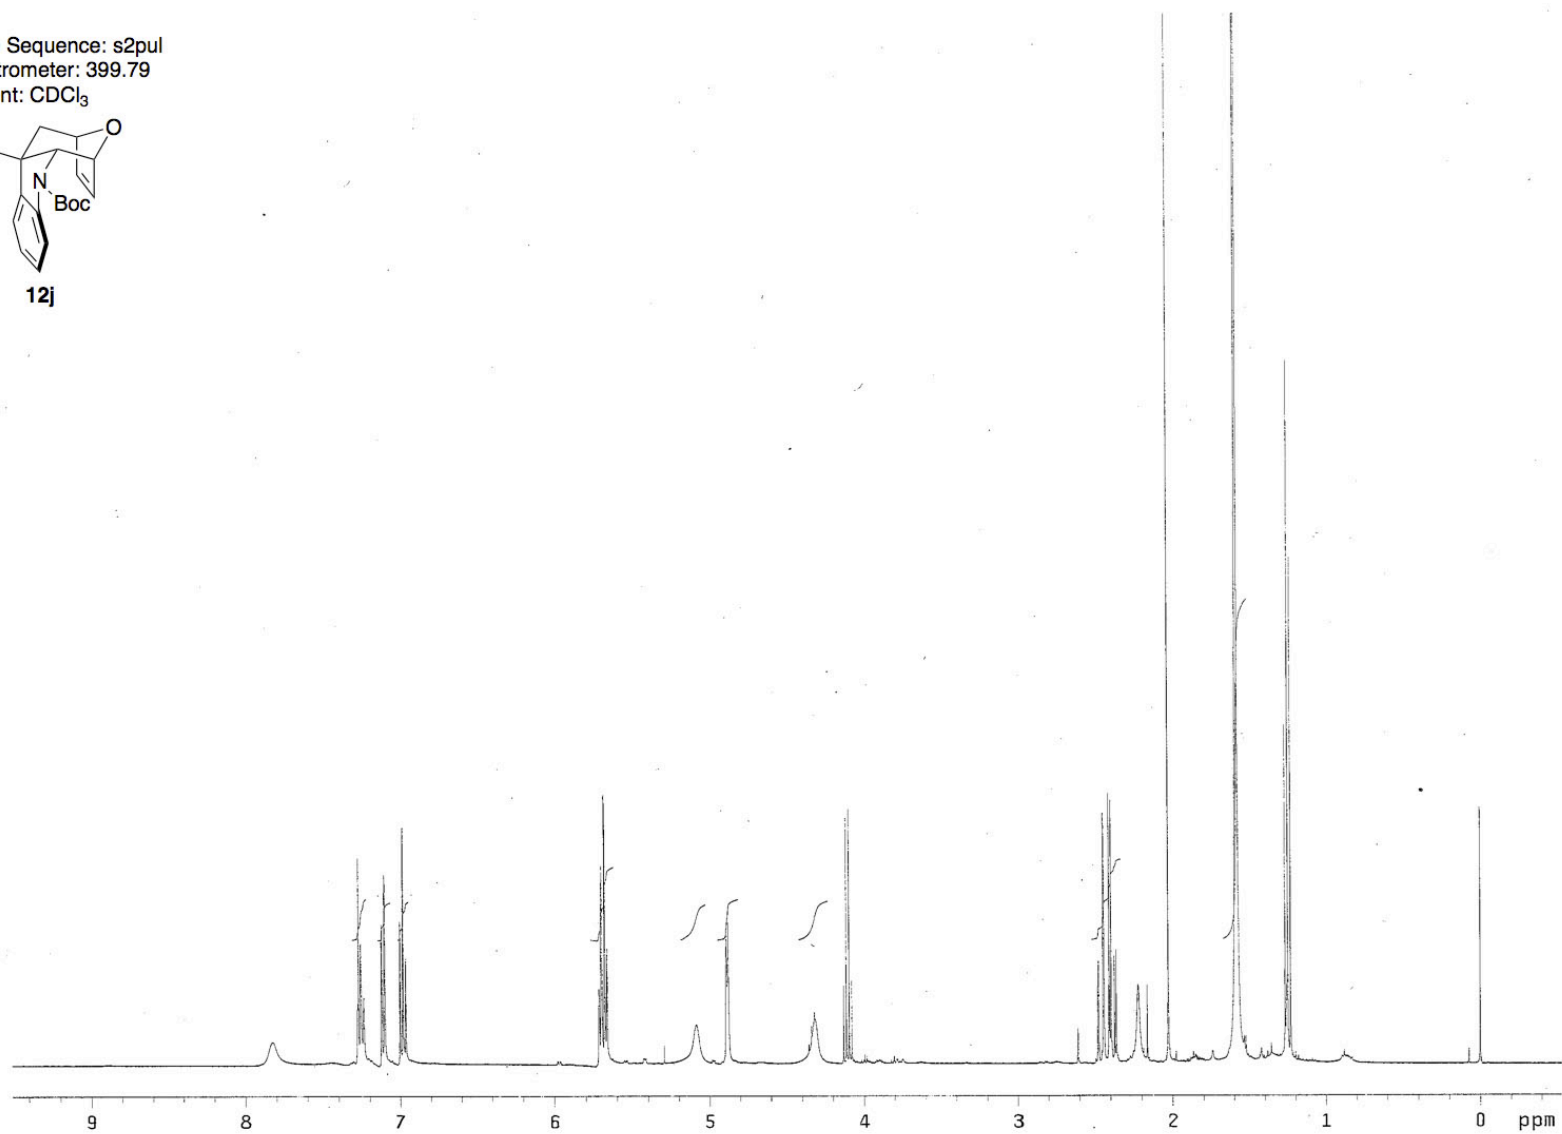

Pulse Sequence: s2pul  
Spectrometer: 100.53  
Solvent: CDCl<sub>3</sub>

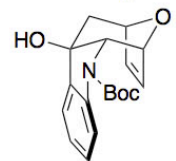

12j

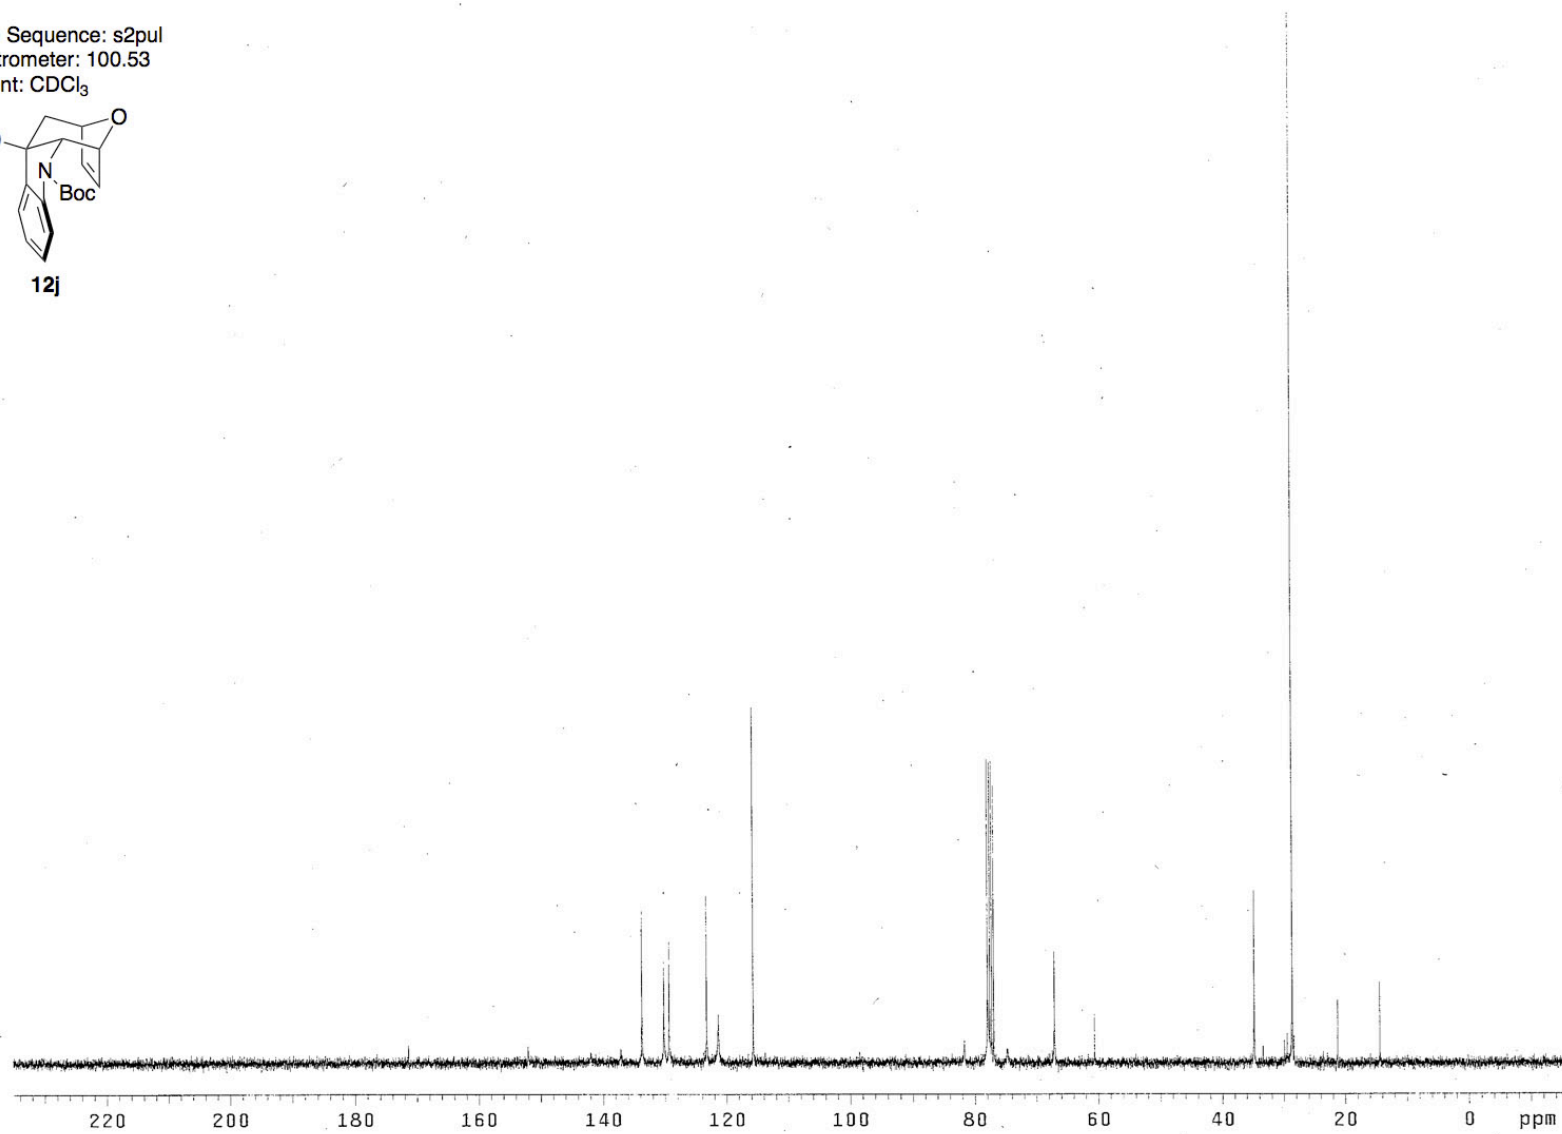

Pulse Sequence: s2pul  
Spectrometer: 399.79  
Solvent: CDCl<sub>3</sub>

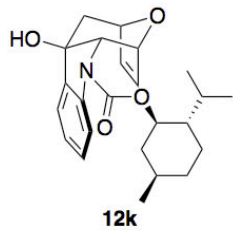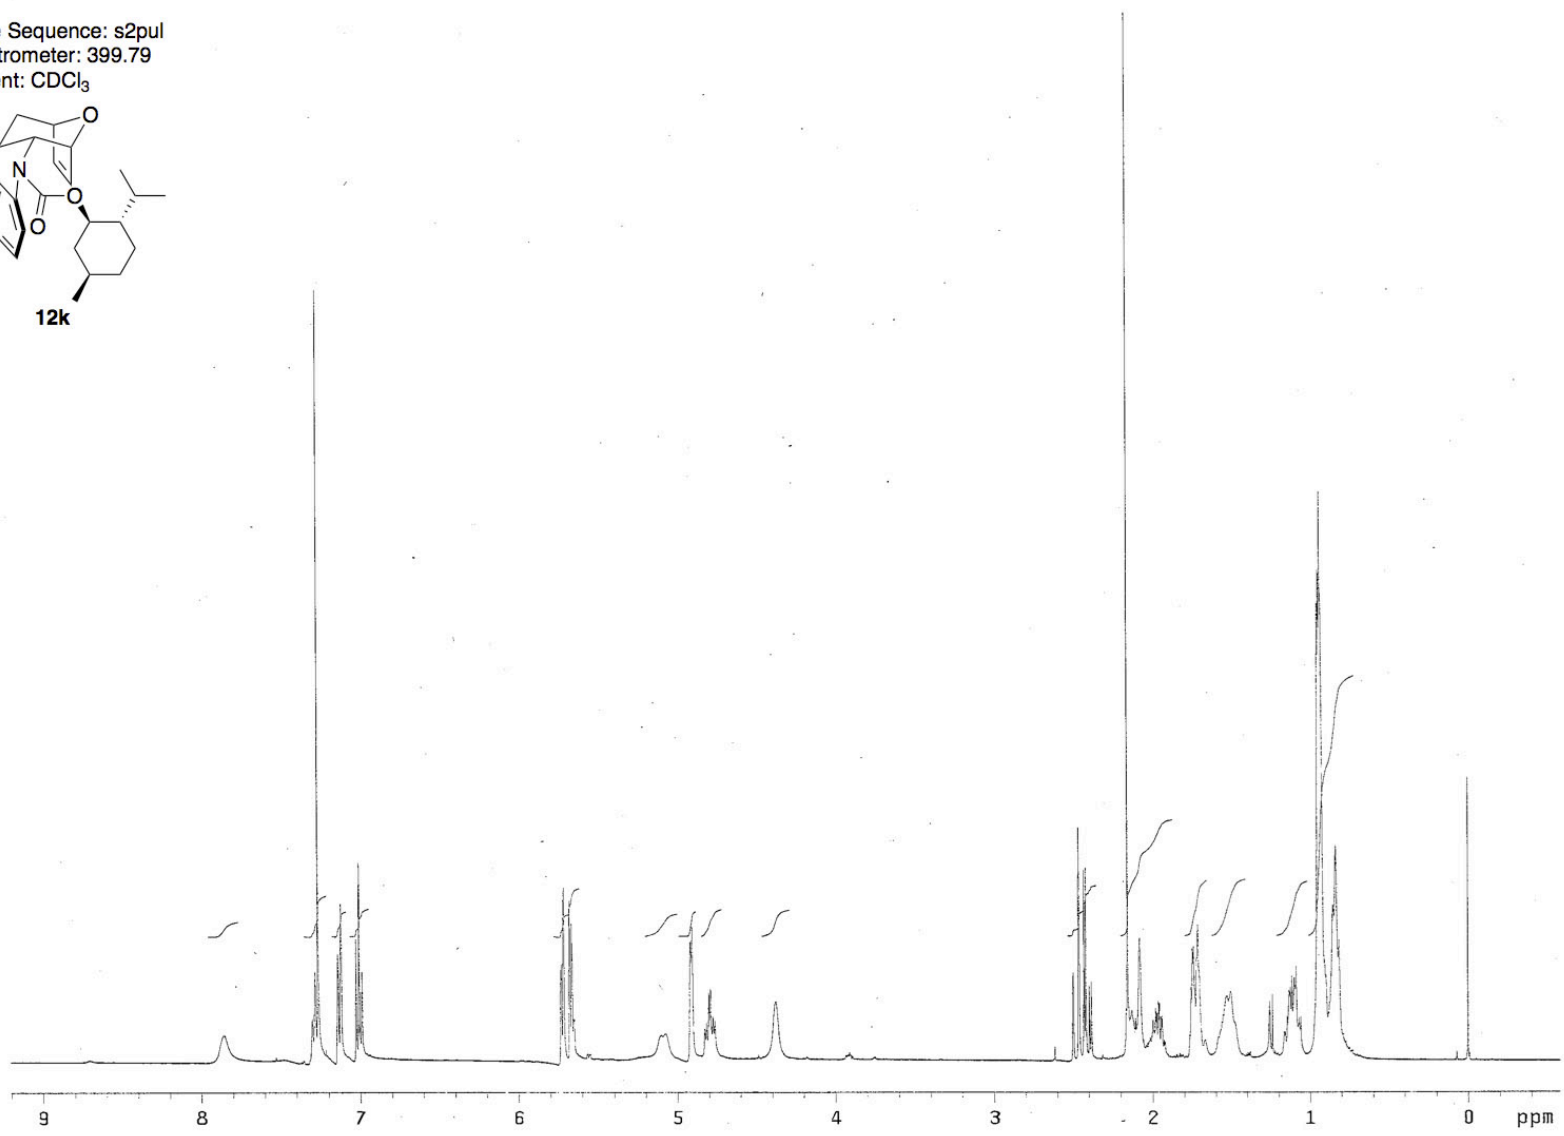

Pulse Sequence: s2pul  
Spectrometer: 100.53  
Solvent: CDCl<sub>3</sub>

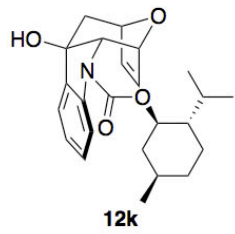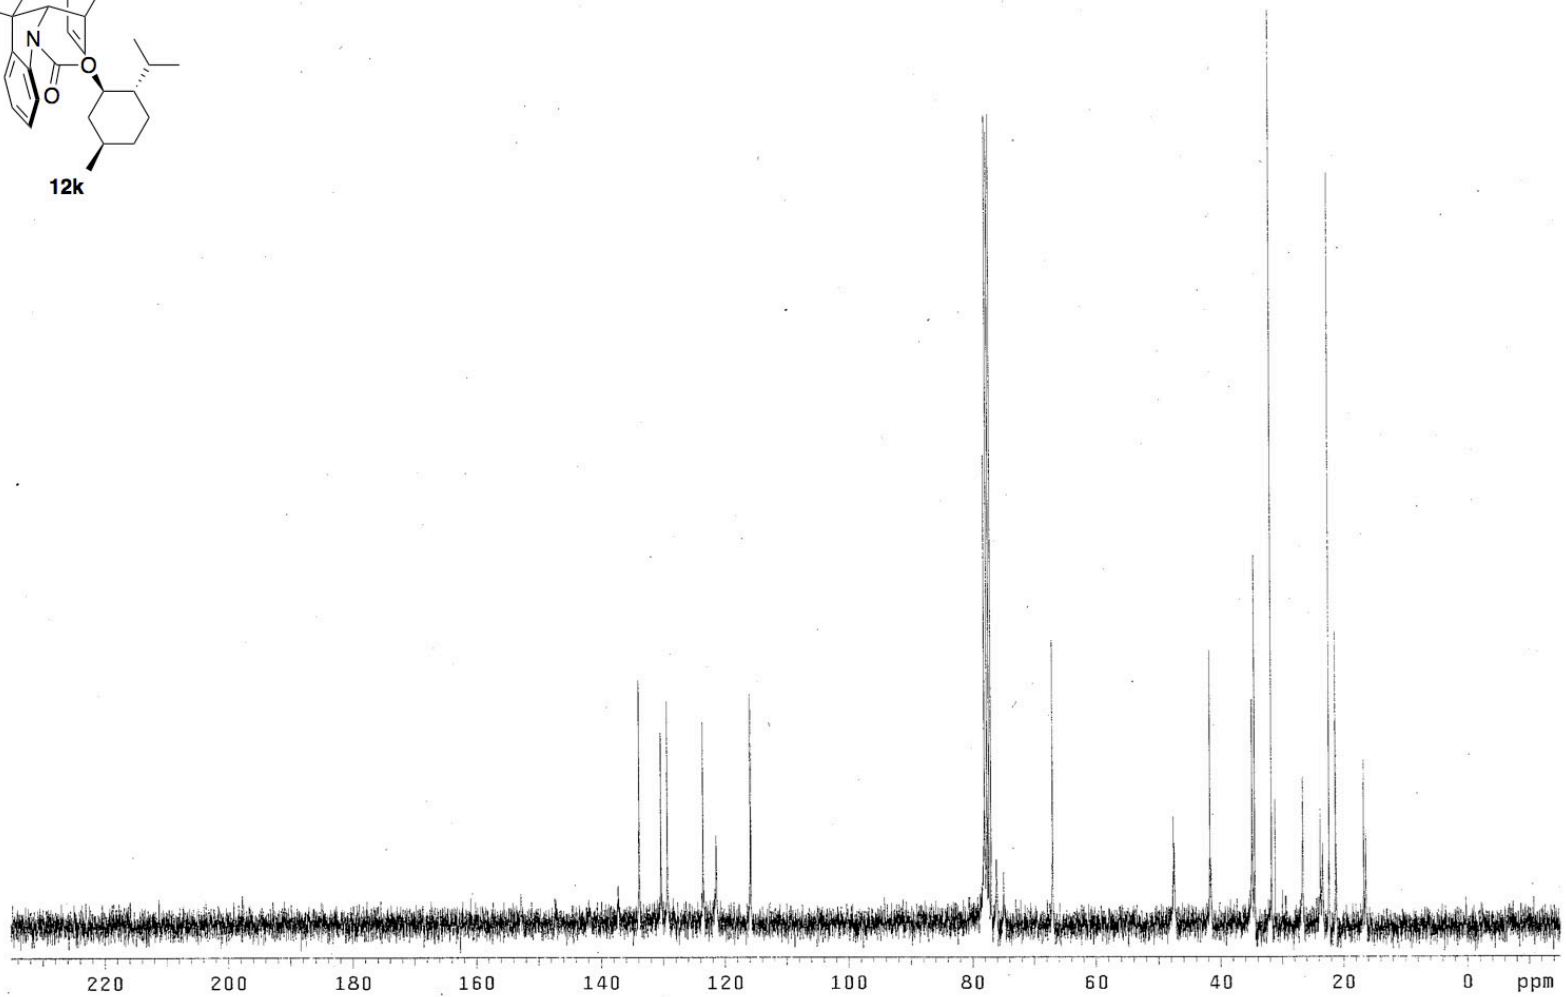

Pulse Sequence: s2pul  
Spectrometer: 399.79  
Solvent: CDCl<sub>3</sub>

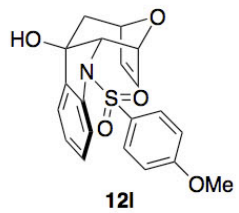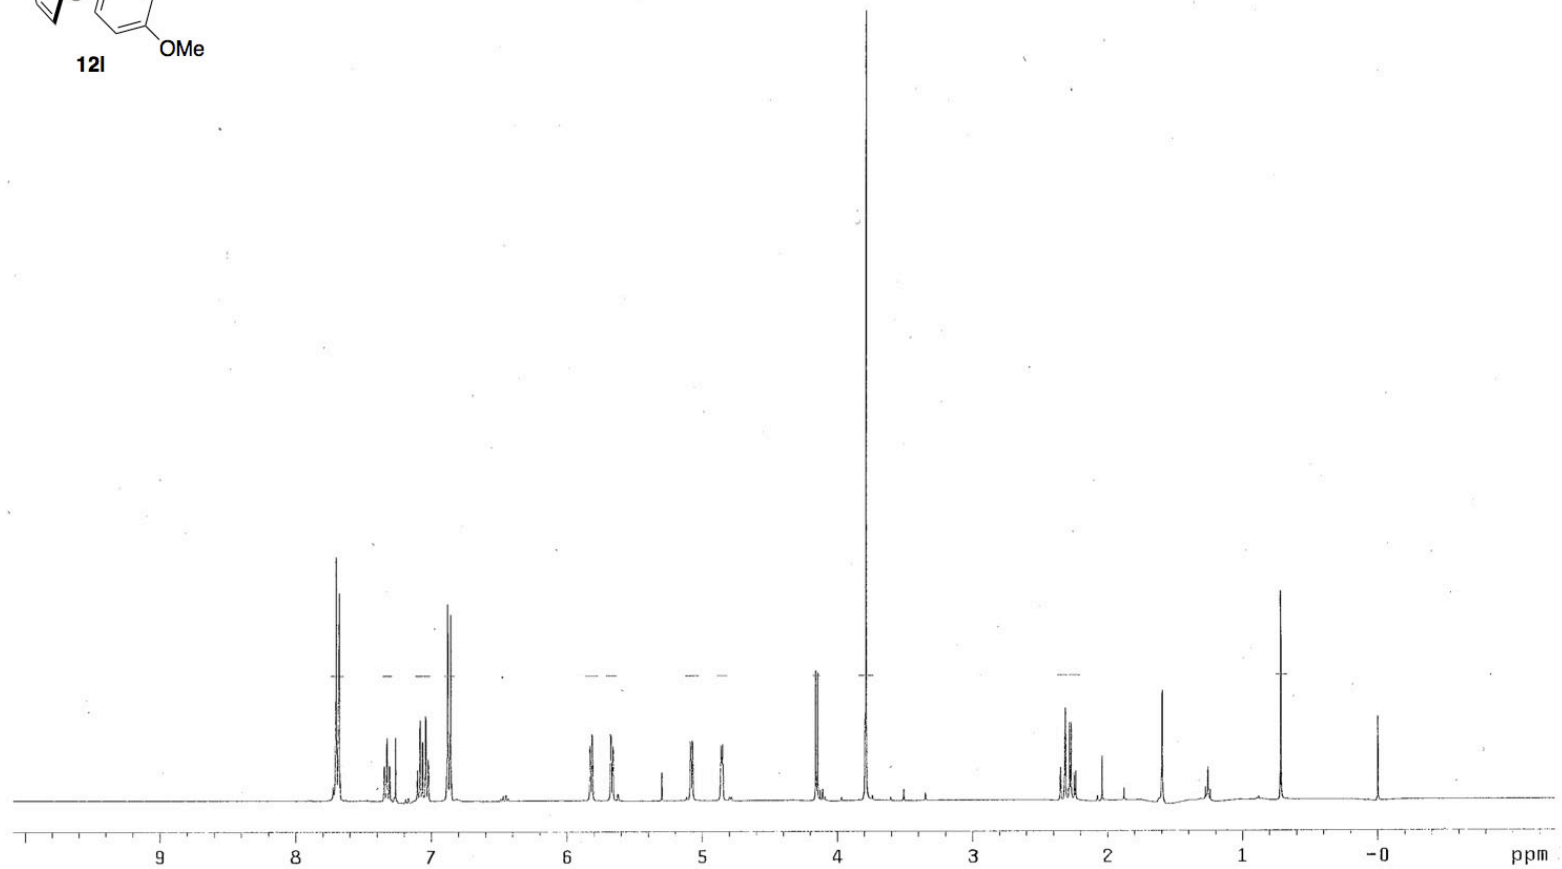

Pulse Sequence: s2pul  
Spectrometer: 100.53  
Solvent: CDCl<sub>3</sub>

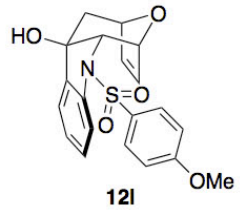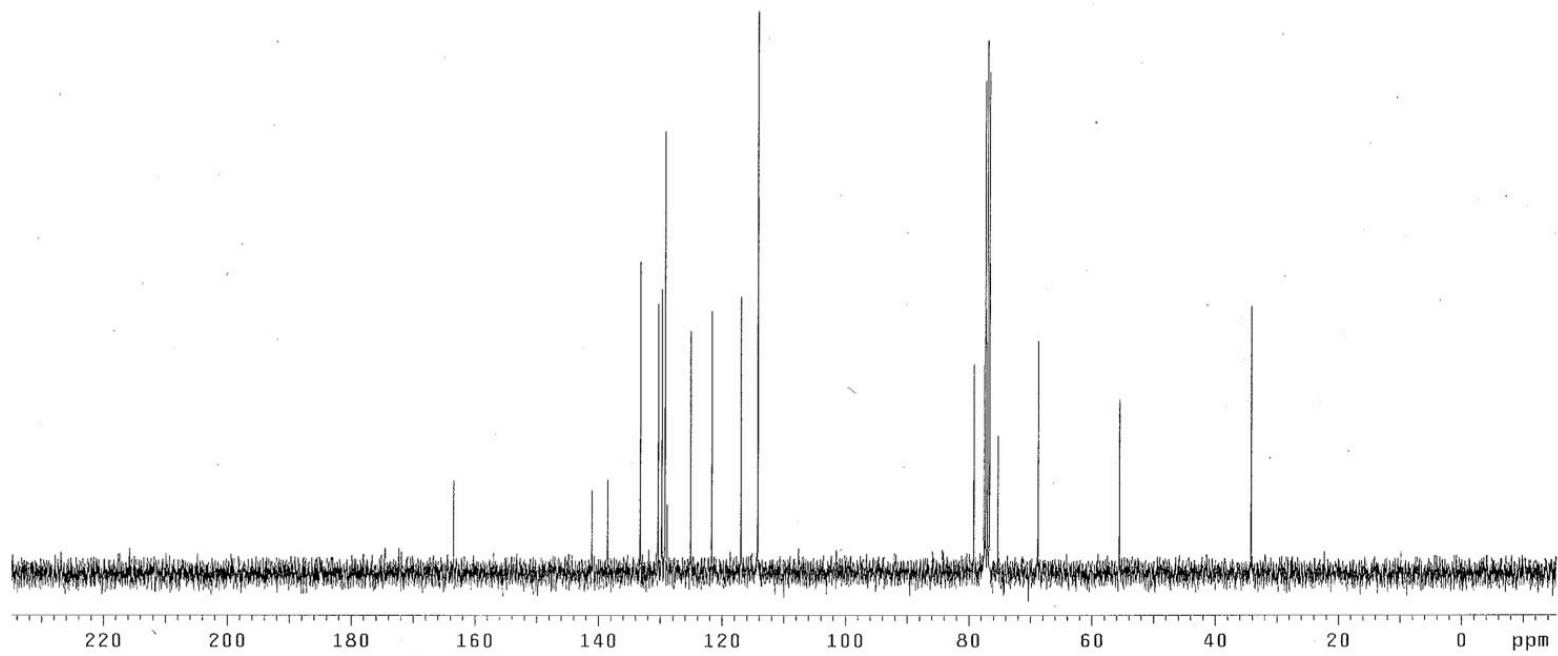

Pulse Sequence: s2pul  
Spectrometer: 399.79  
Solvent: CDCl<sub>3</sub>

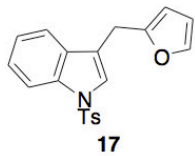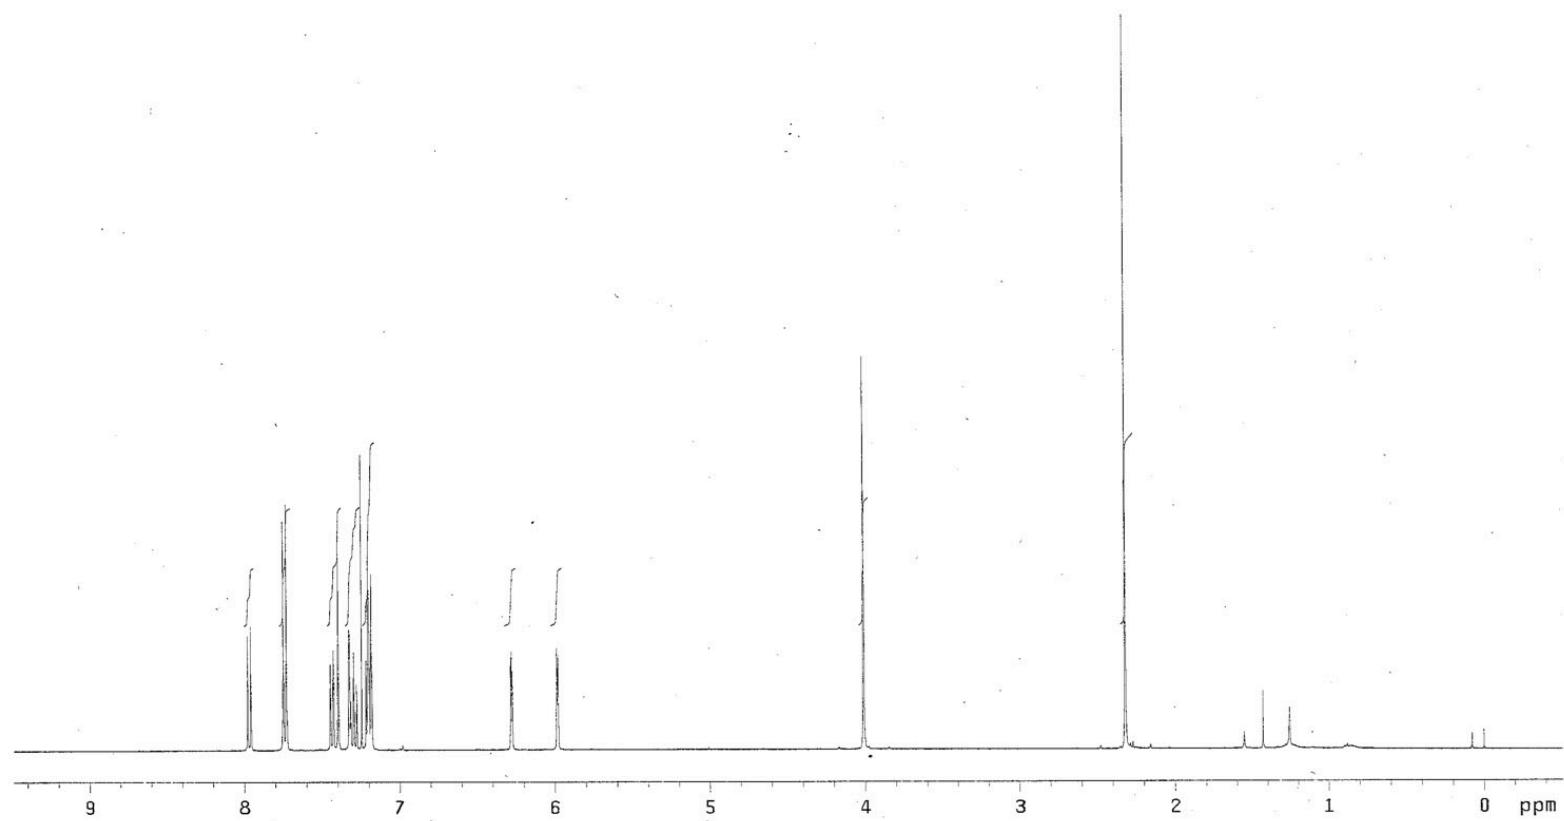

Pulse Sequence: s2pul  
Spectrometer: 100.53  
Solvent: CDCl<sub>3</sub>

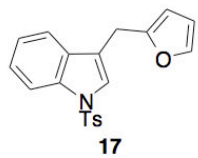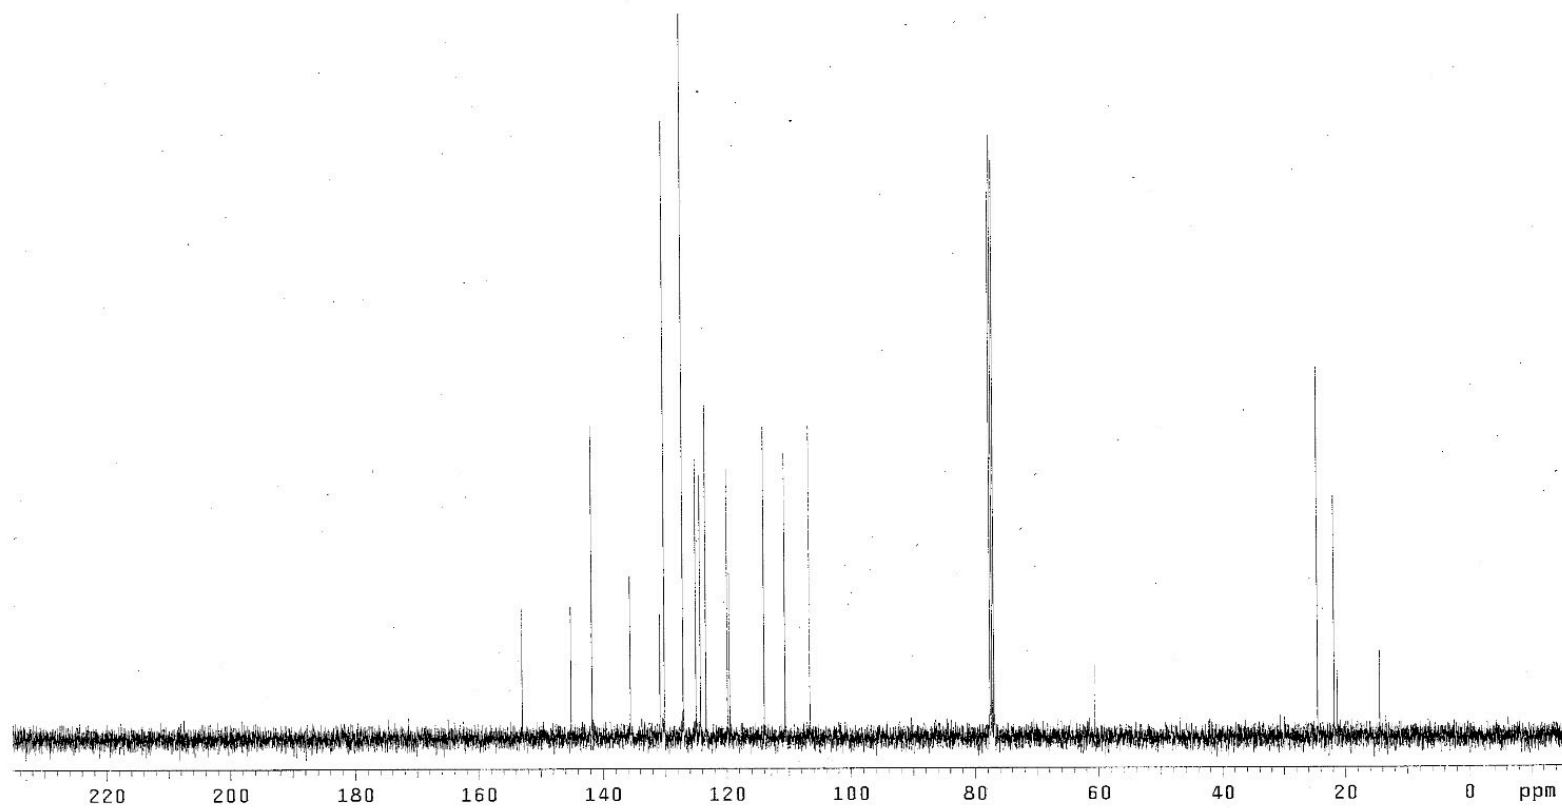



Pulse Sequence: gCOSY  
Solvent: CDCl3  
Temp. 25.0 C / 298.1 K  
File: gCOSY  
INOVA-500 "nmr03"

Relax. delay 1.000 sec  
Acq. time 0.128 sec  
Width 4000.4 Hz  
2D Width 4001.6 Hz  
2 repetitions  
128 increments  
OBSERVE H1, 399.7865296 MHz  
DATA PROCESSING  
Sq. sine bell 0.064 sec  
F1 DATA PROCESSING  
Sq. sine bell 0.032 sec  
FT size 4096 x 2048  
Total time 5 min, 14 sec

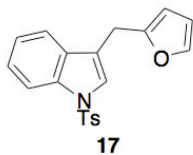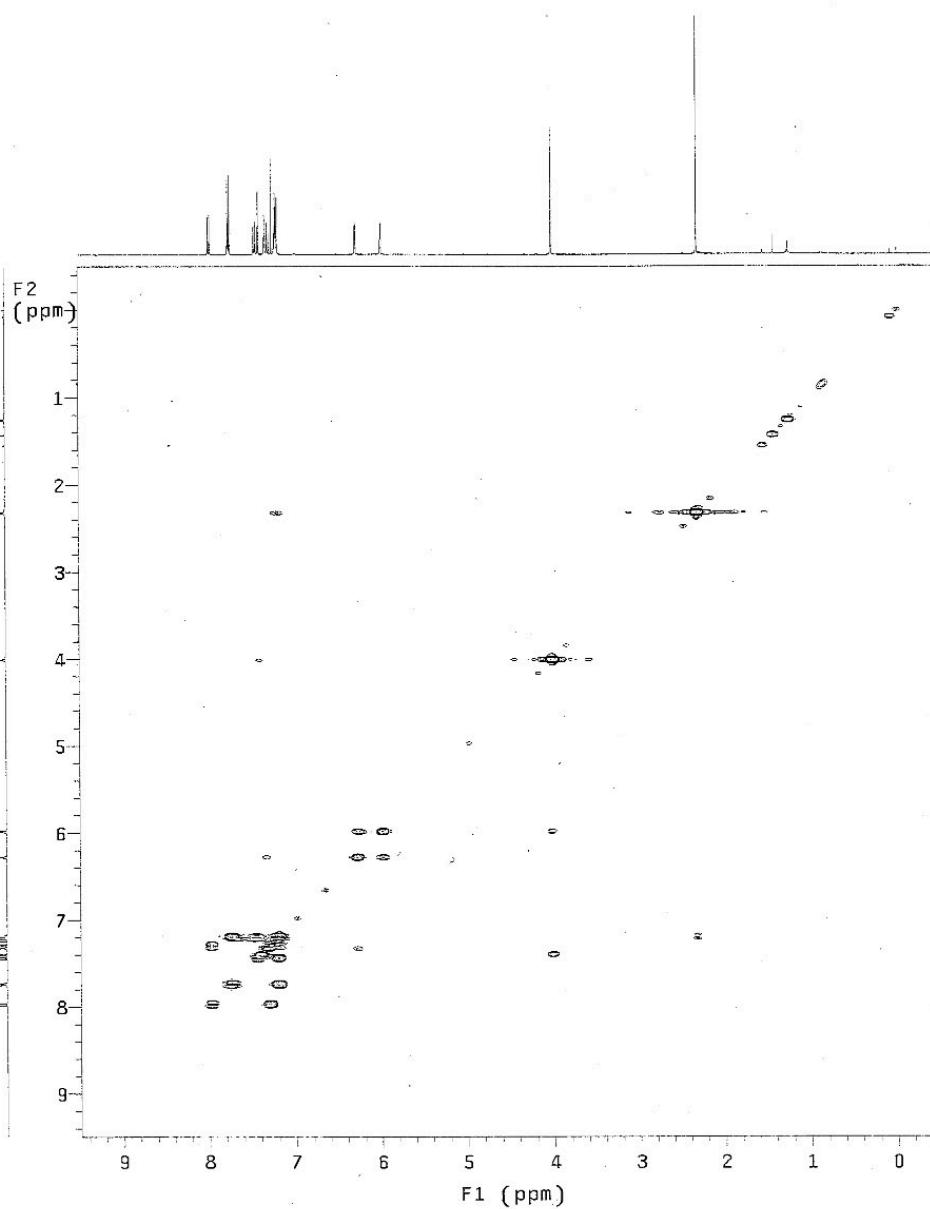

Pulse Sequence: gCOSY  
Solvent: CDCl3  
Temp. 25.0 C / 298.1 K  
File: gCOSY  
INNOVA-500 "nmr03"

Relax. delay 1.000 sec  
Acq. time 0.128 sec  
Width 4000.4 Hz  
2D Width 4001.6 Hz  
2 repetitions  
128 increments  
OBSERVE F1, 399.7865296 MHz  
DATA PROCESSING  
Sq. sine bell 0.064 sec  
F1 DATA PROCESSING  
Sq. sine bell 0.032 sec  
FT size 4096 x 2048  
Total time 5 min, 14 sec

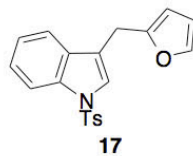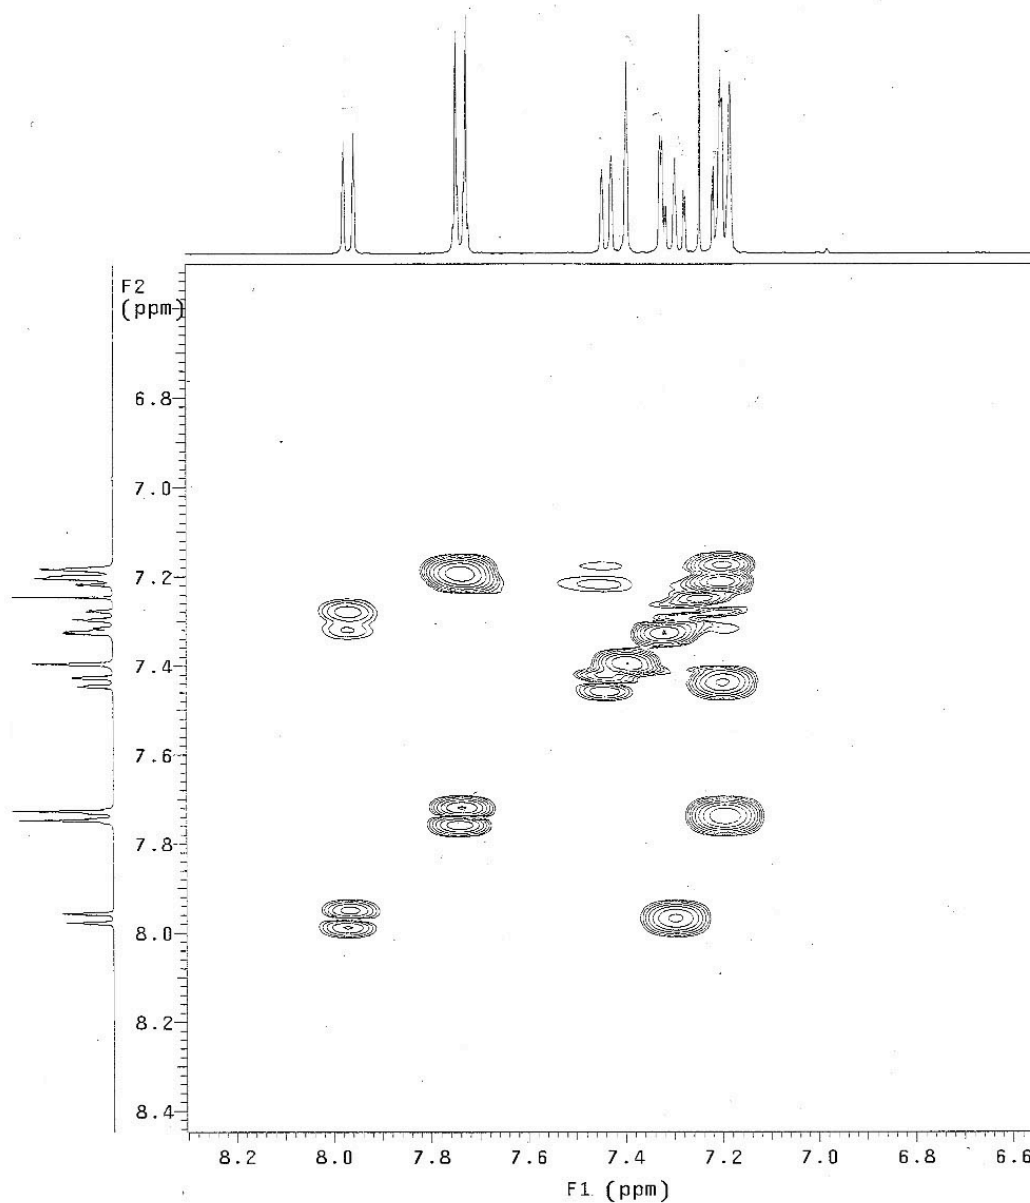

Pulse Sequence: gHSQC

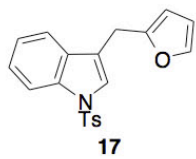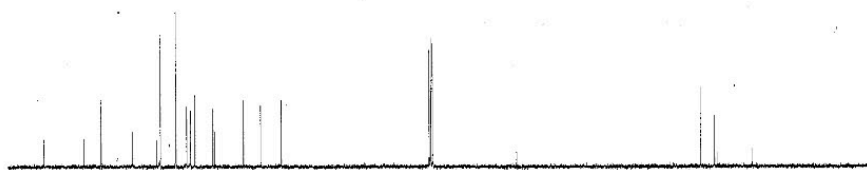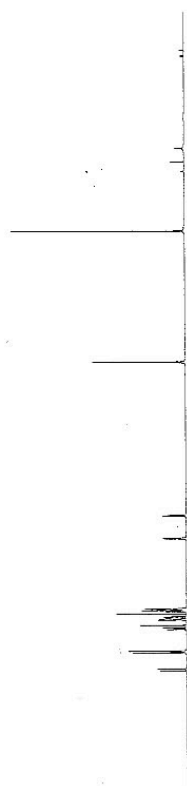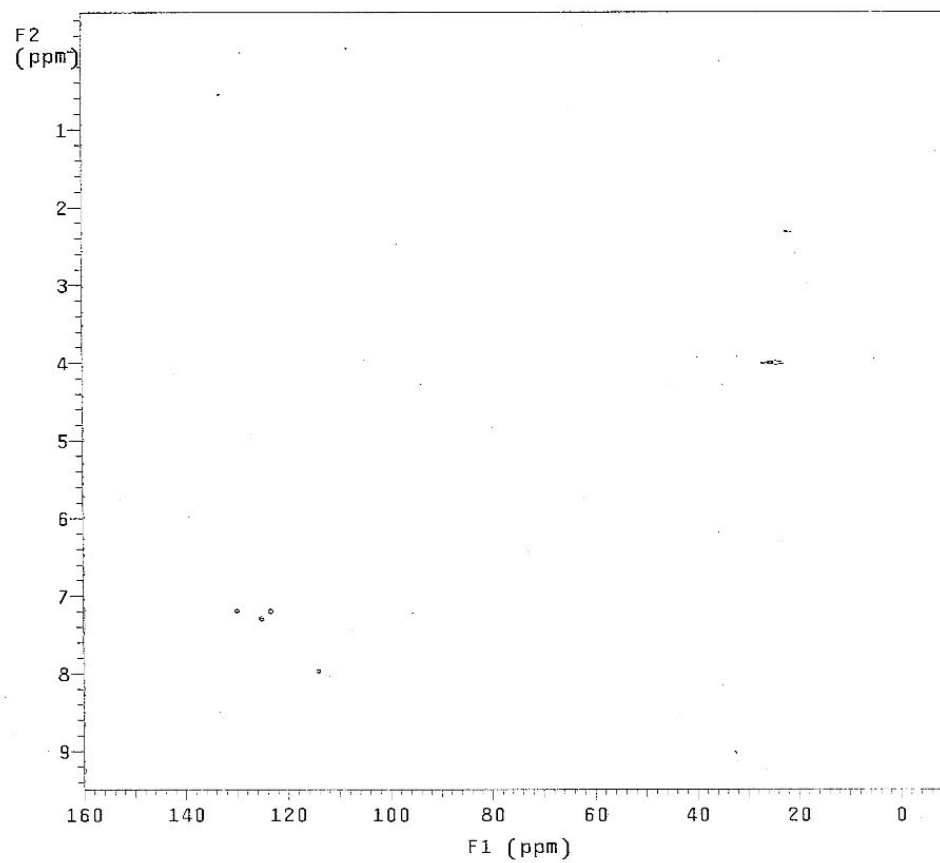

Pulse Sequence: s2pul  
Spectrometer: 399.79  
Solvent: CD<sub>3</sub>OD

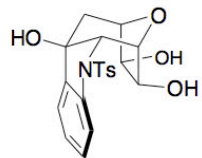

18

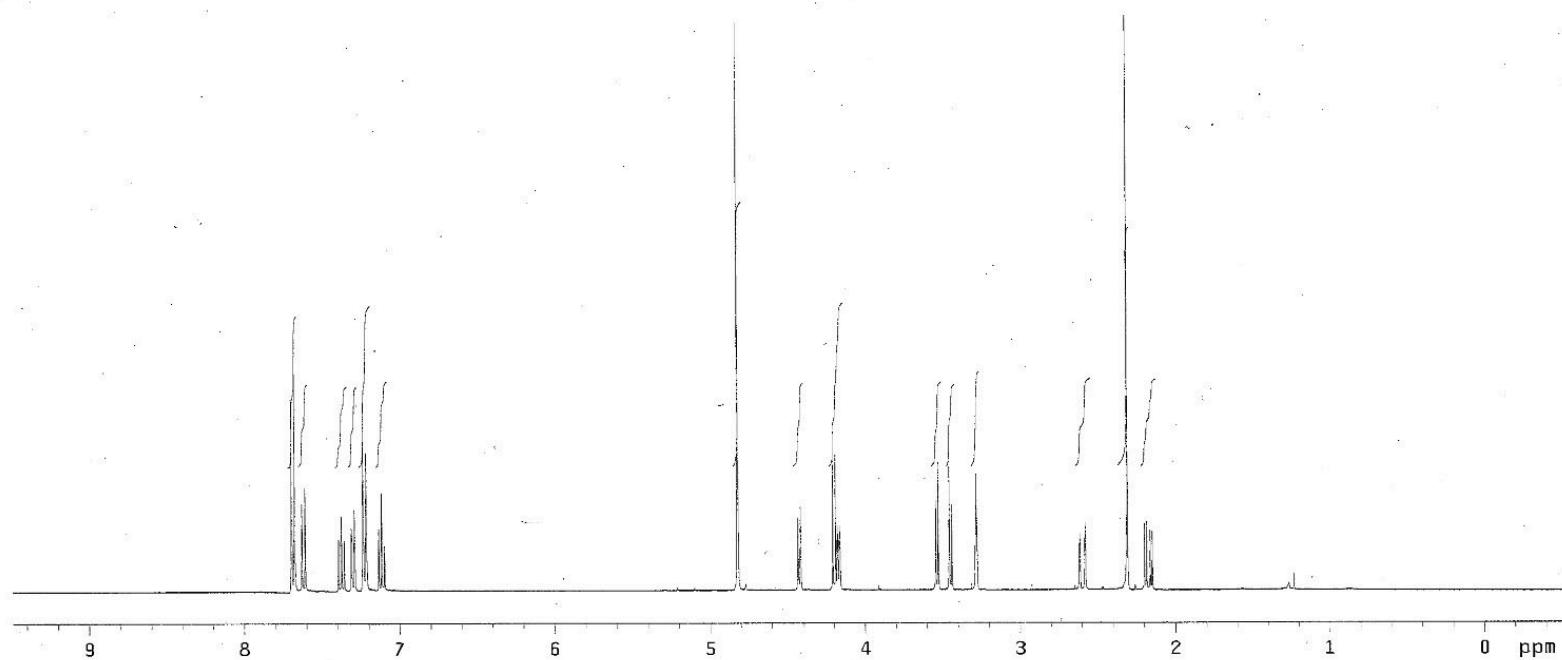

Pulse Sequence: s2pul  
Spectrometer: 100.53  
Solvent: CD<sub>3</sub>OD

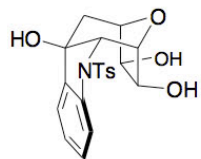

**18**

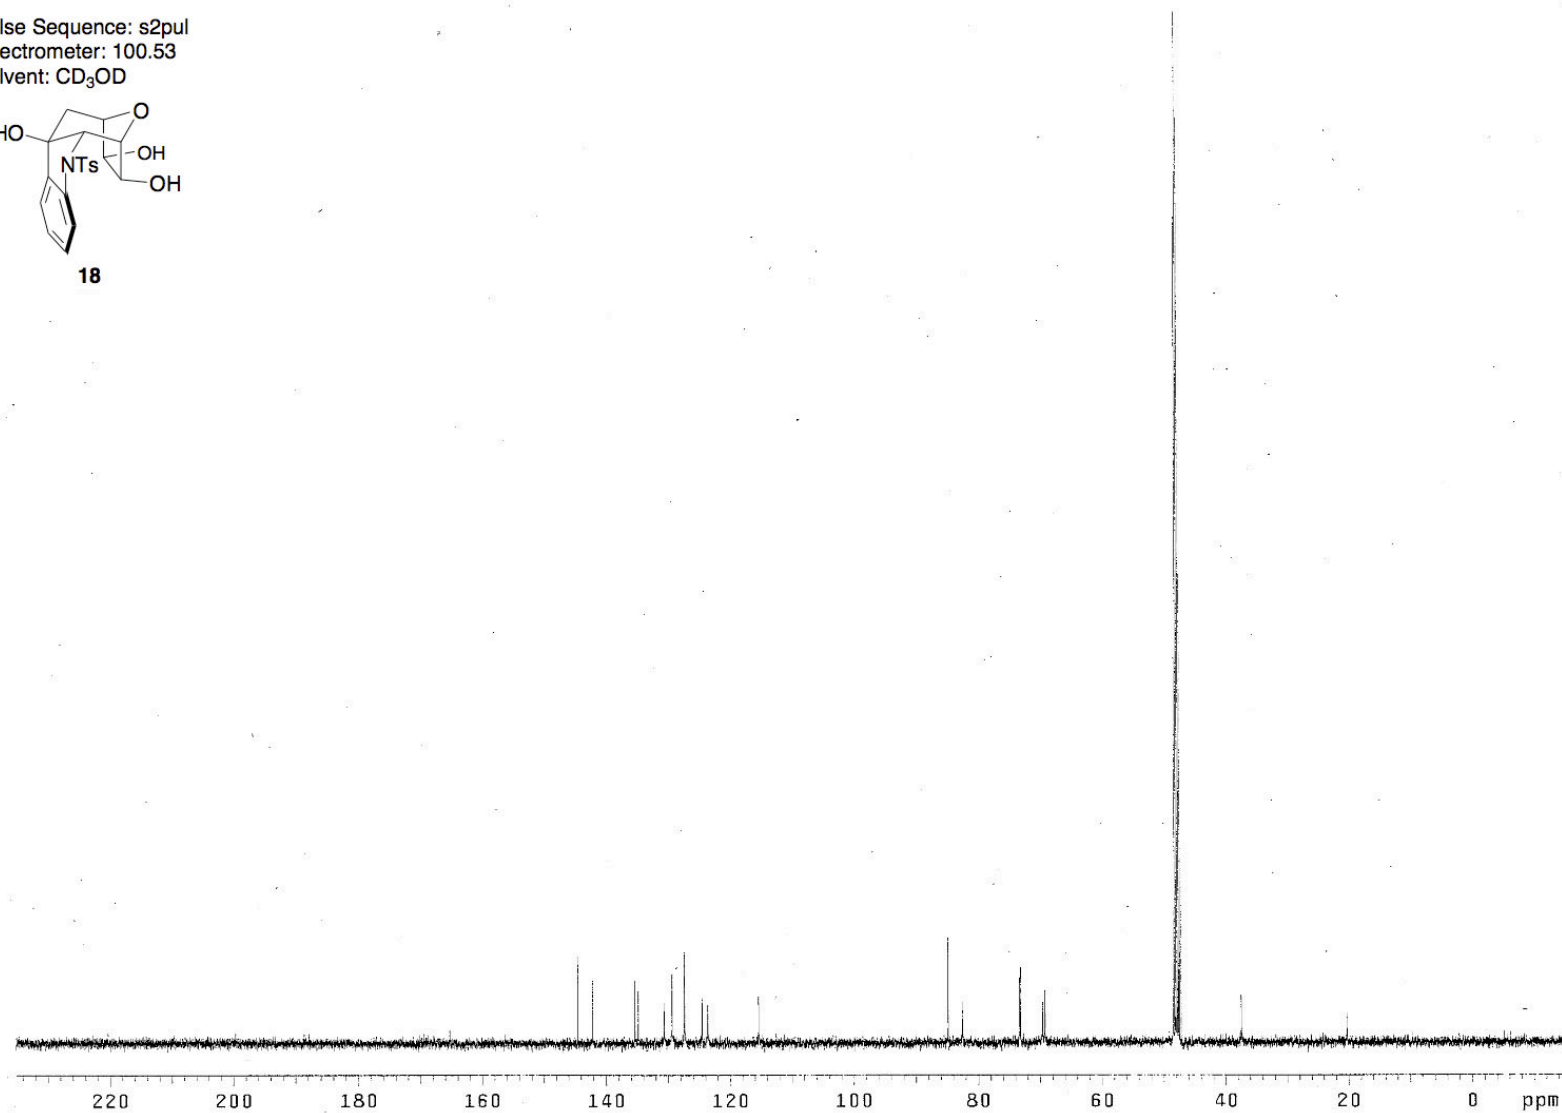

Pulse Sequence: s2pul  
Spectrometer: 399.79  
Solvent: (CD<sub>3</sub>)<sub>2</sub>CO

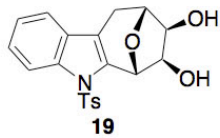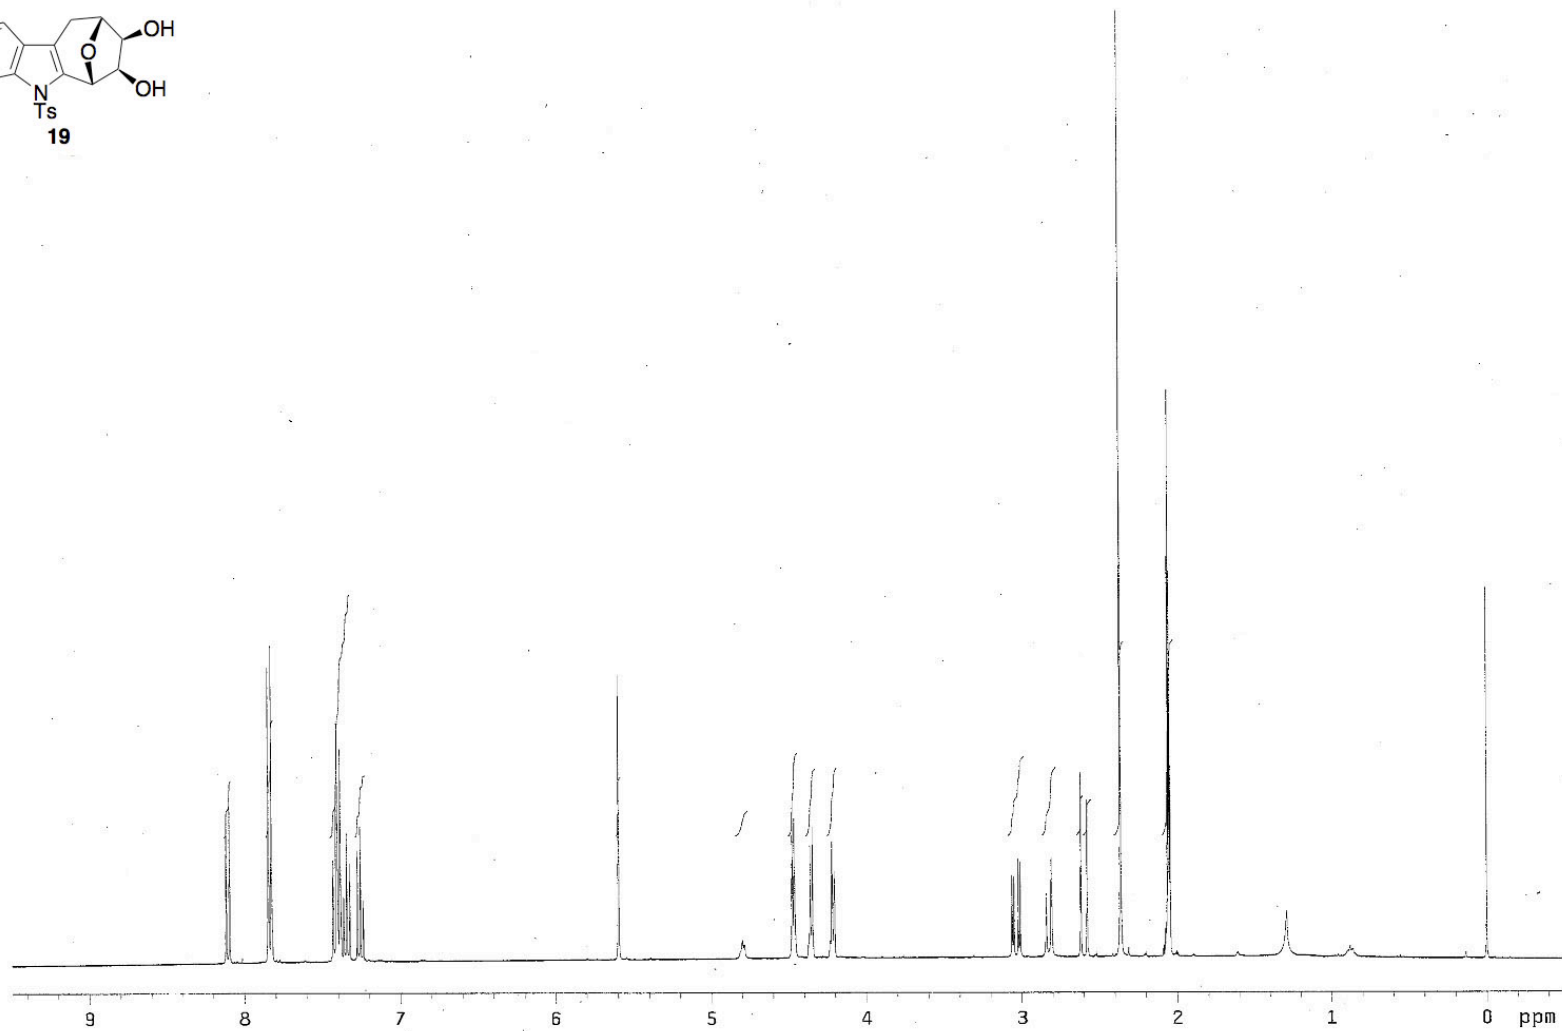

Pulse Sequence: s2pul  
Spectrometer: 100.53  
Solvent: (CD<sub>3</sub>)<sub>2</sub>CO

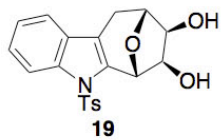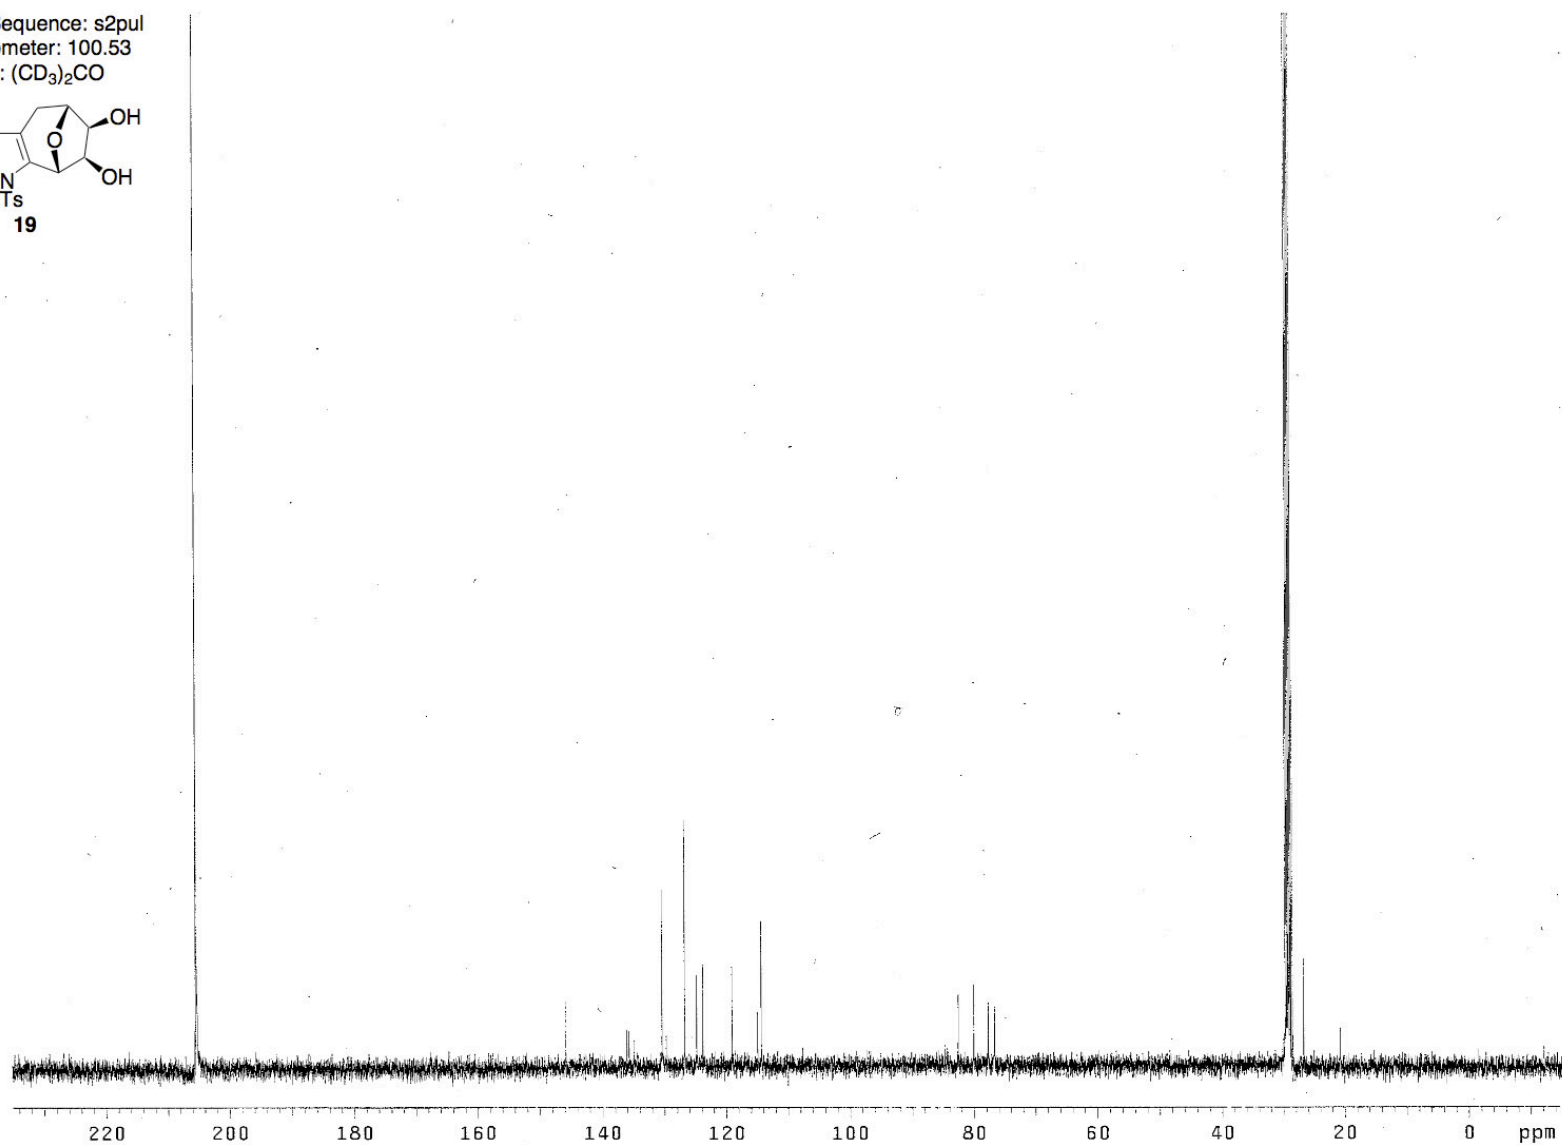

Pulse Sequence: s2pul  
Spectrometer: 399.79  
Solvent: CDCl<sub>3</sub>

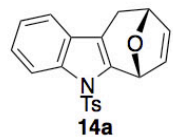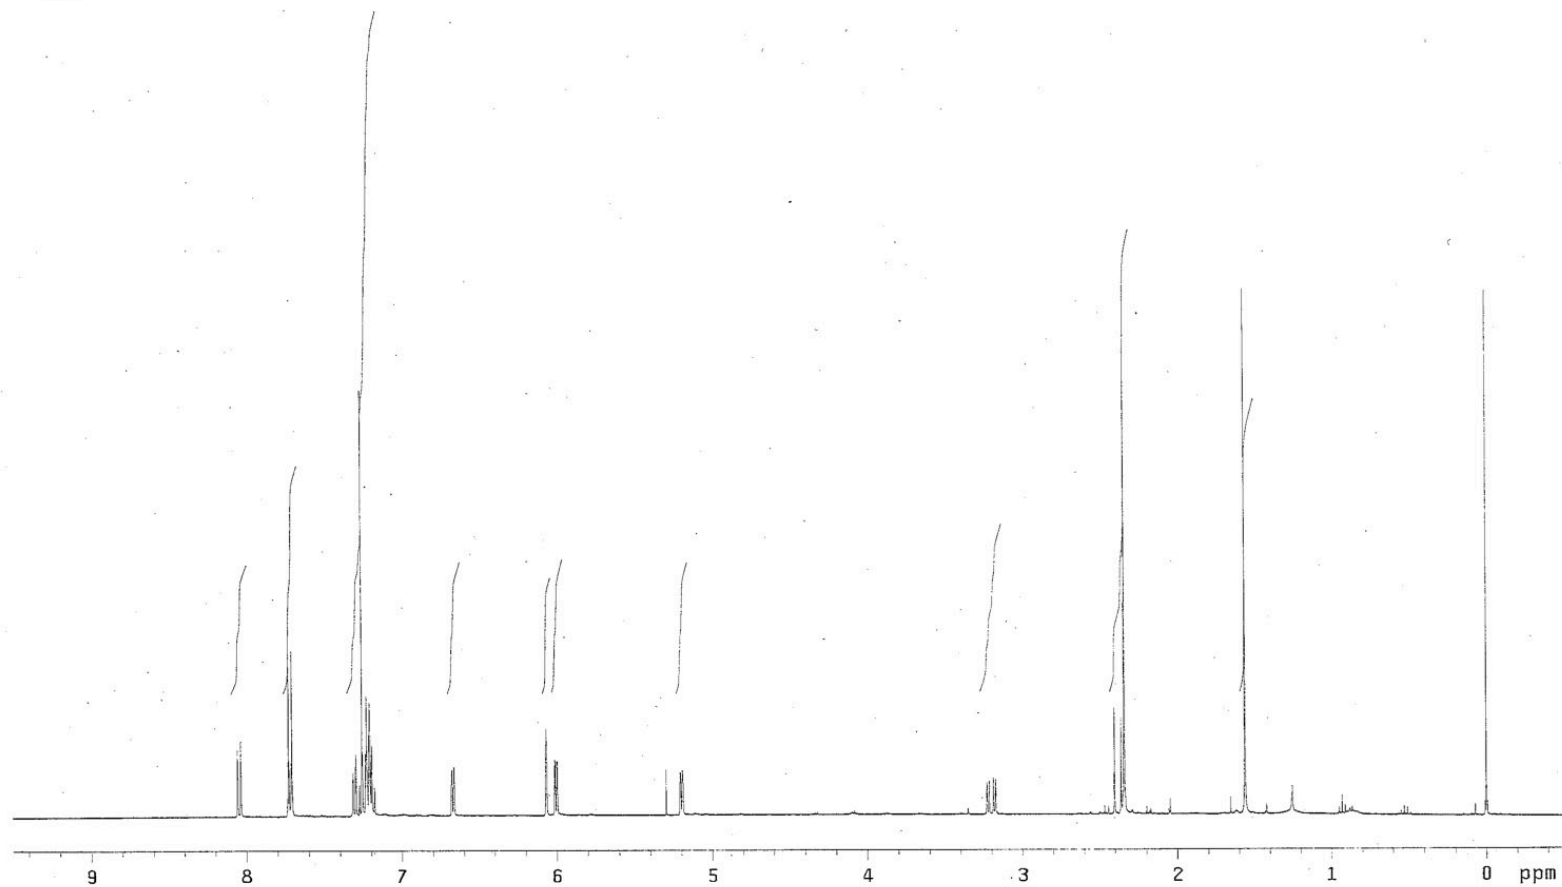



Pulse Sequence: s2pul  
Spectrometer: 100.53  
Solvent: CDCl<sub>3</sub>

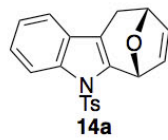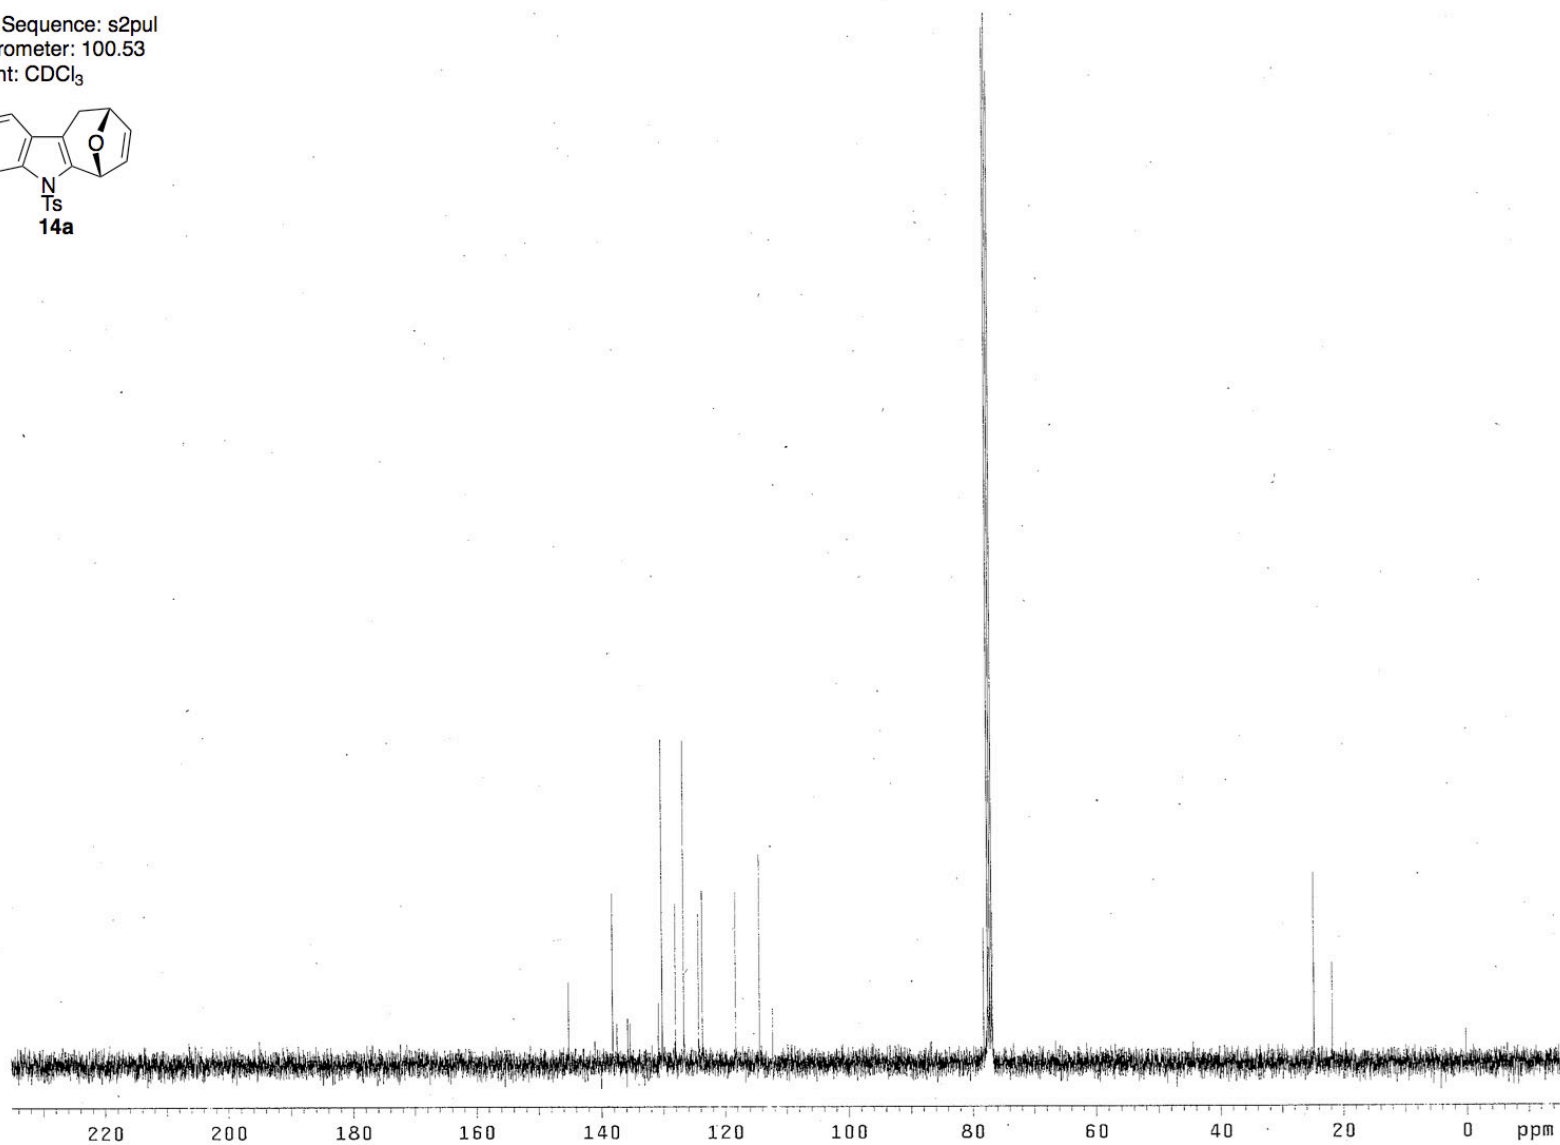

Pulse Sequence: s2pul  
Spectrometer: 399.79  
Solvent: CDCl<sub>3</sub>

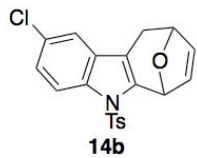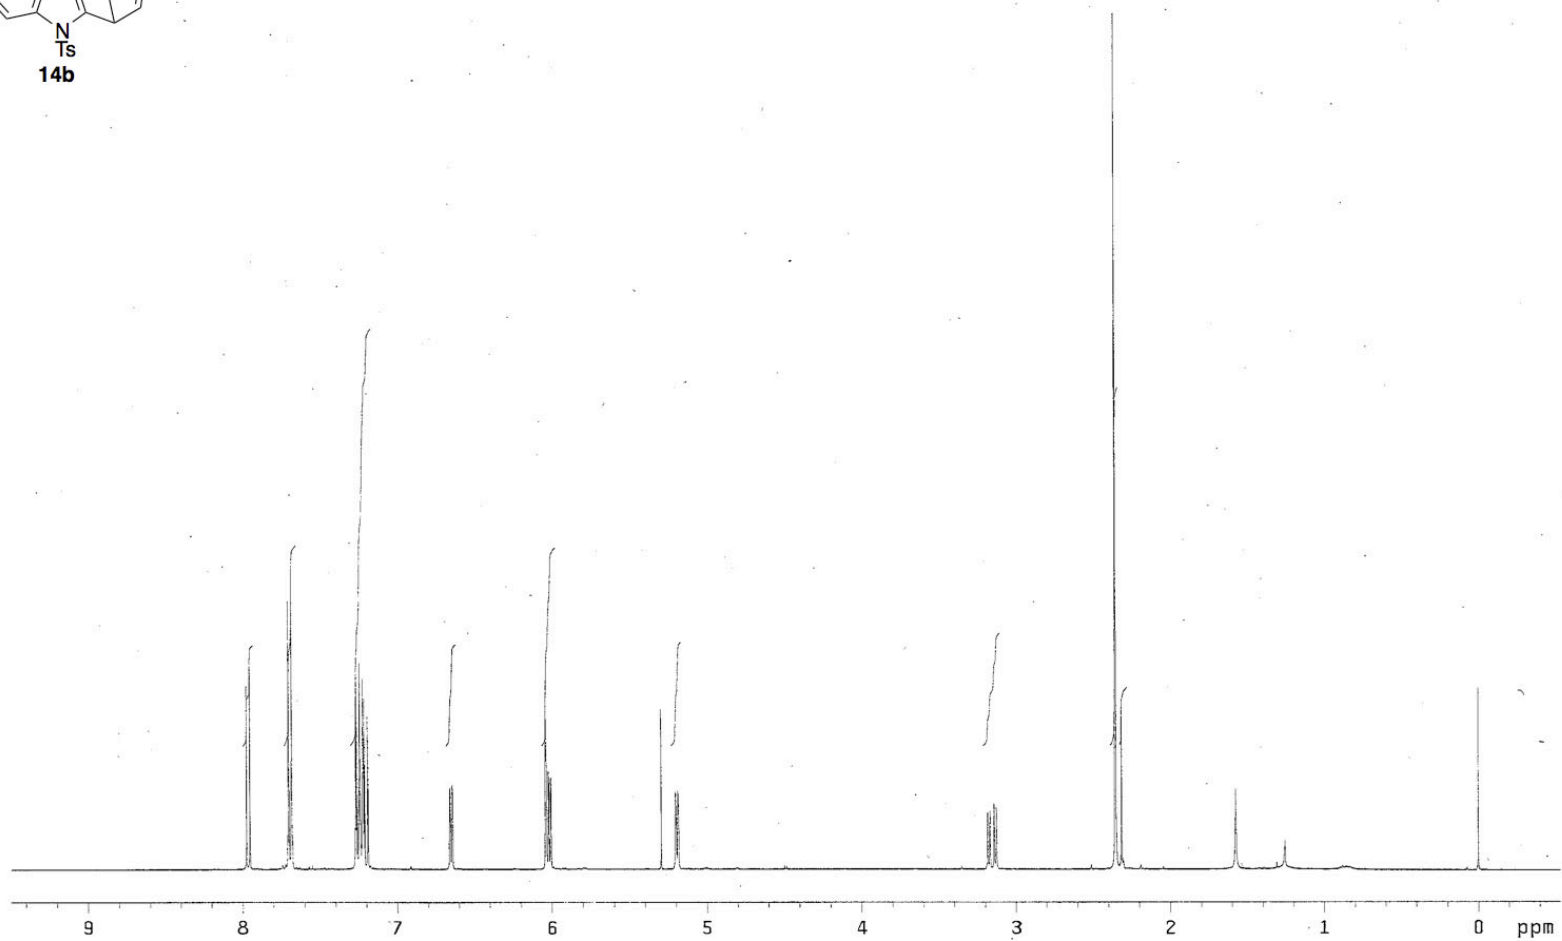

Pulse Sequence: s2pul  
Spectrometer: 100.53  
Solvent: CDCl<sub>3</sub>

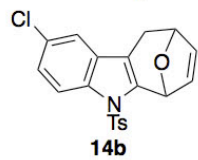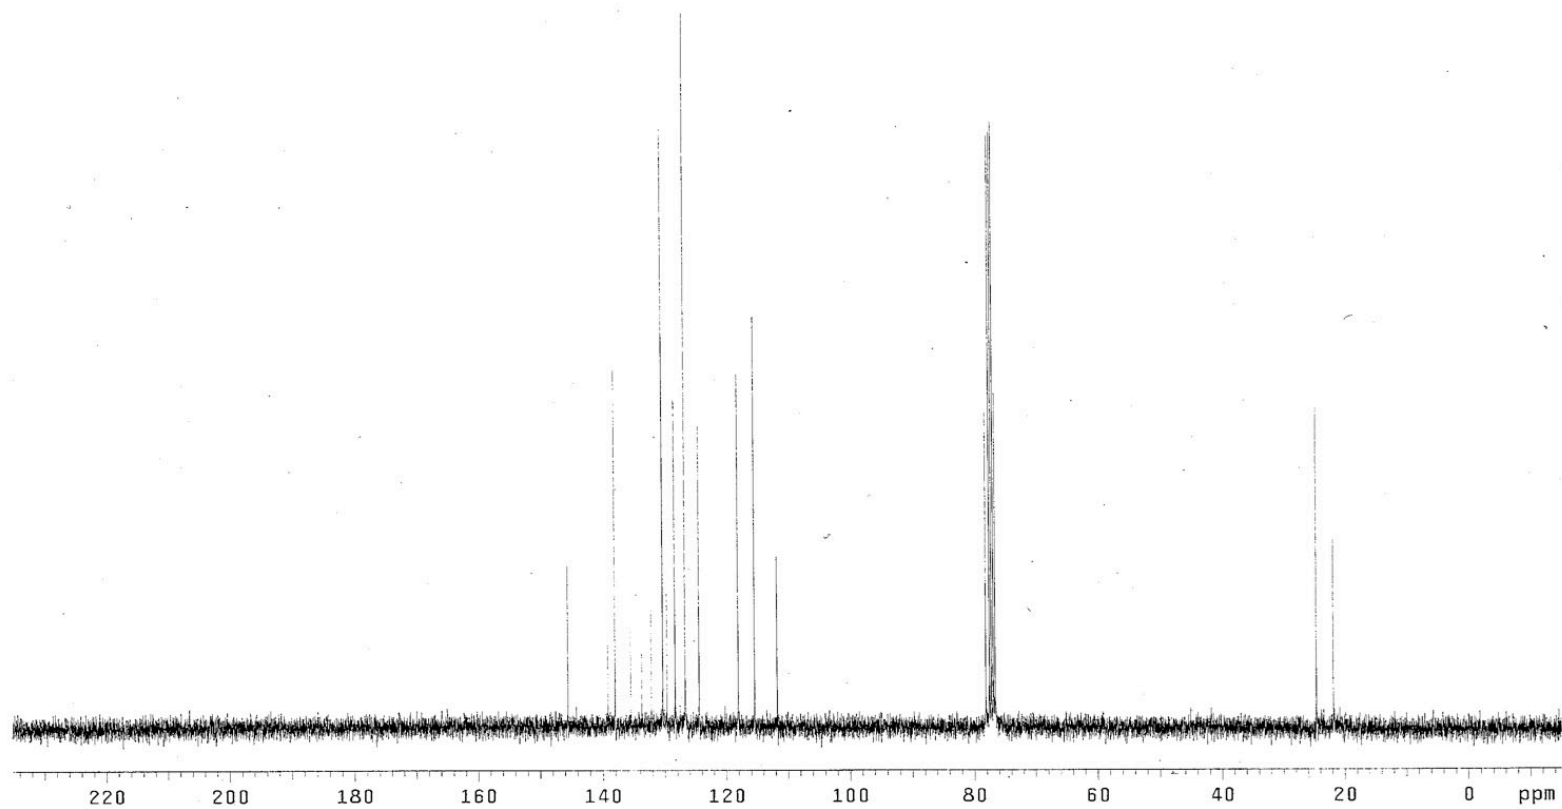

Pulse Sequence: s2pul  
Spectrometer: 399.79  
Solvent: CDCl<sub>3</sub>

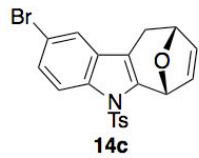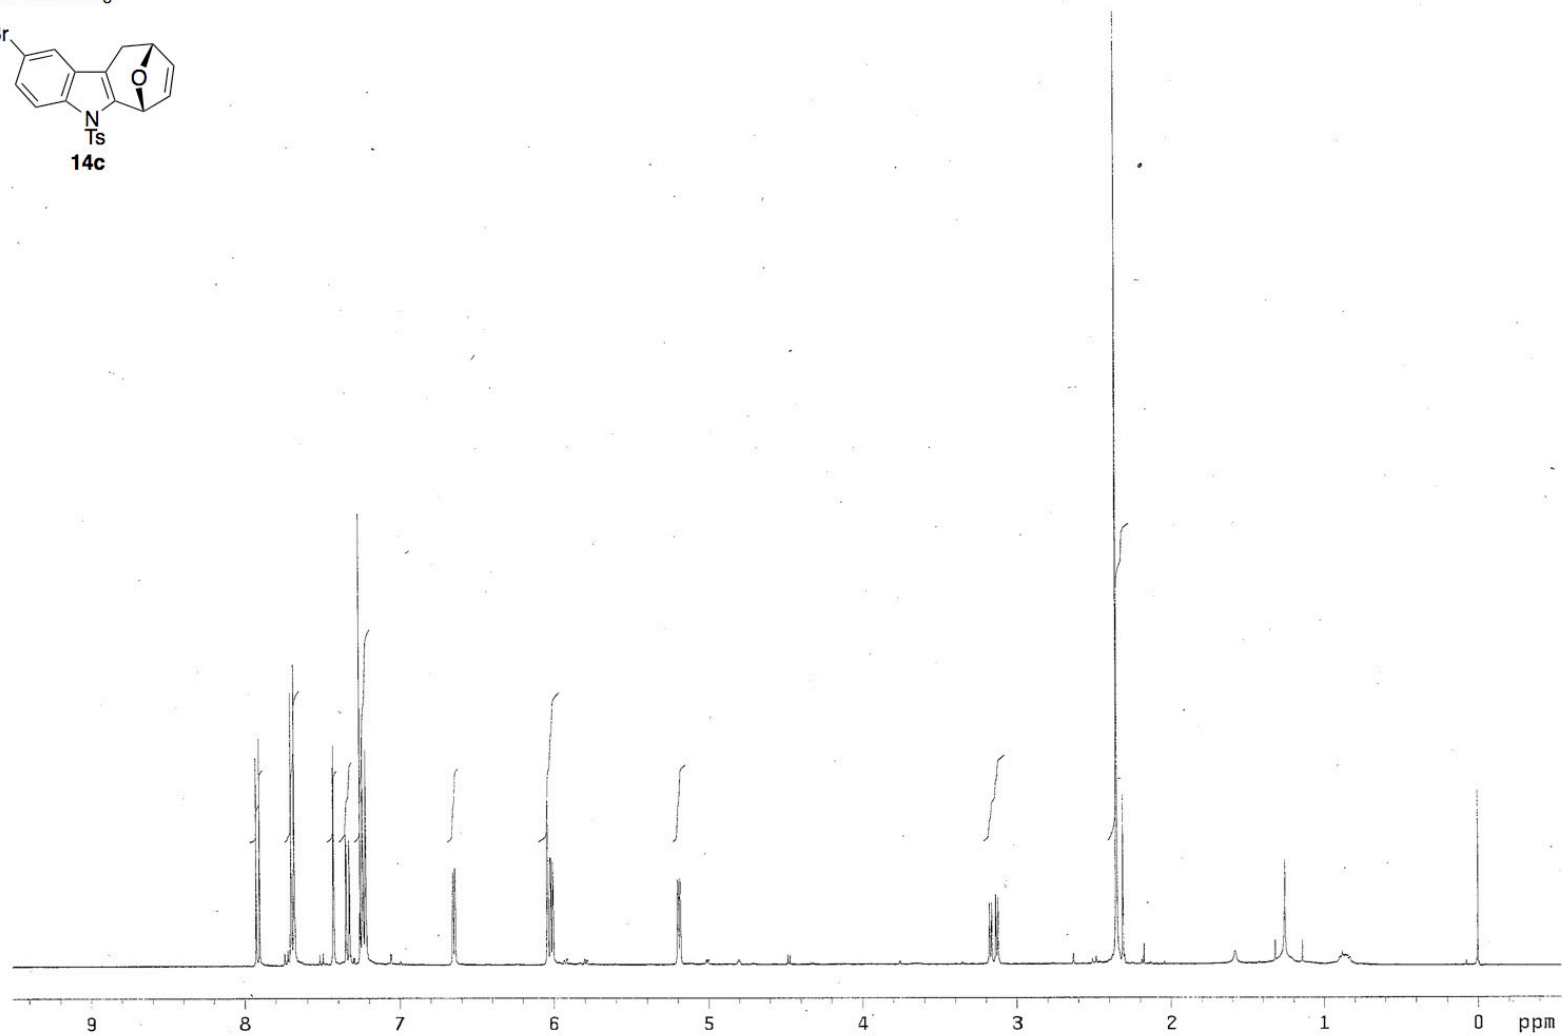

Pulse Sequence: s2pul  
Spectrometer: 100.53  
Solvent: CDCl<sub>3</sub>

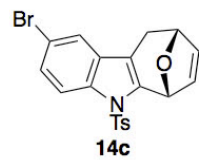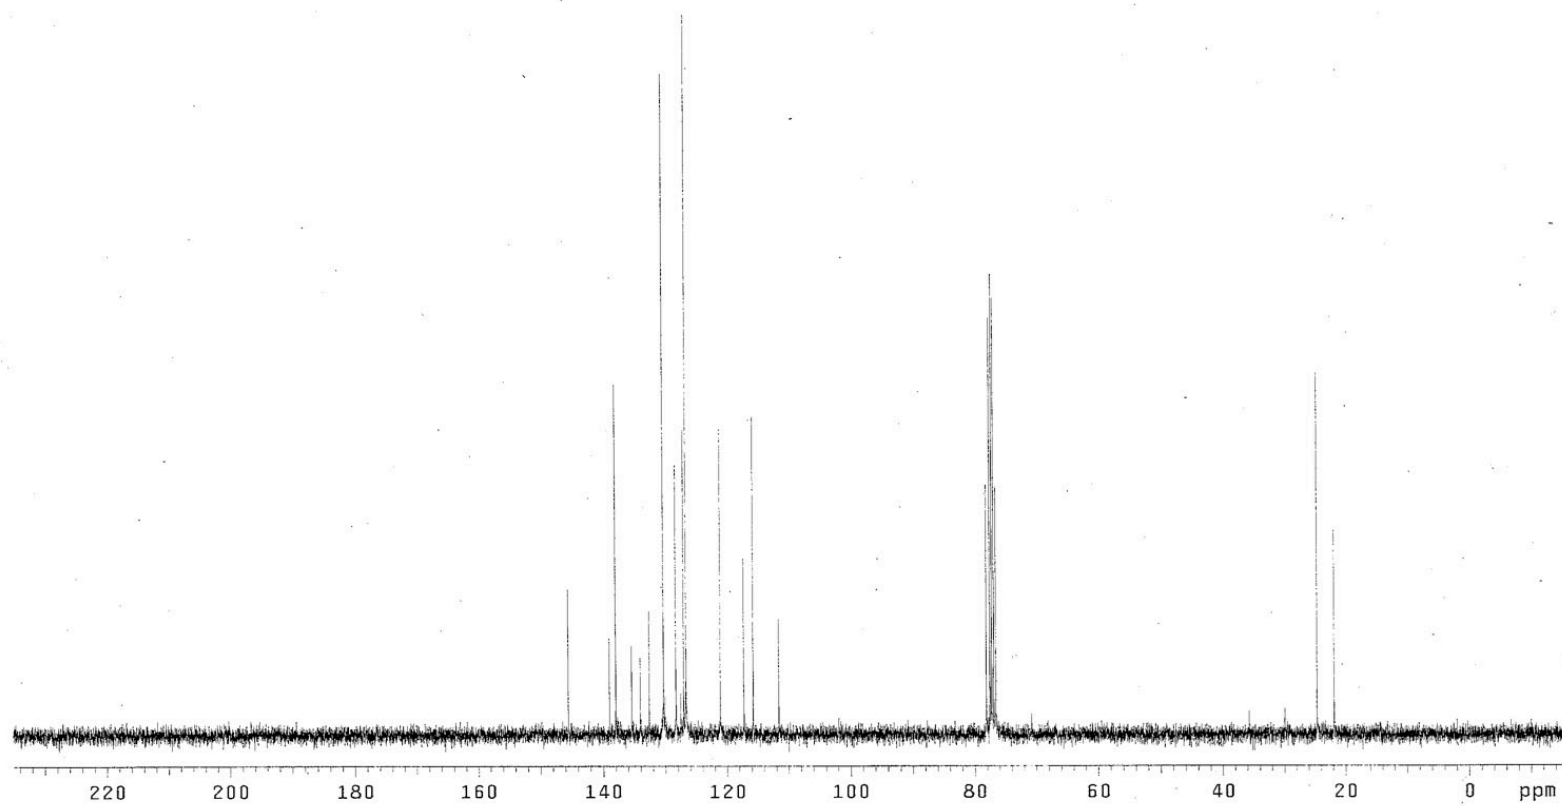

Pulse Sequence: s2pul  
Spectrometer: 399.79  
Solvent: CDCl<sub>3</sub>

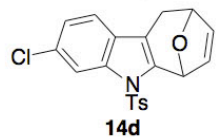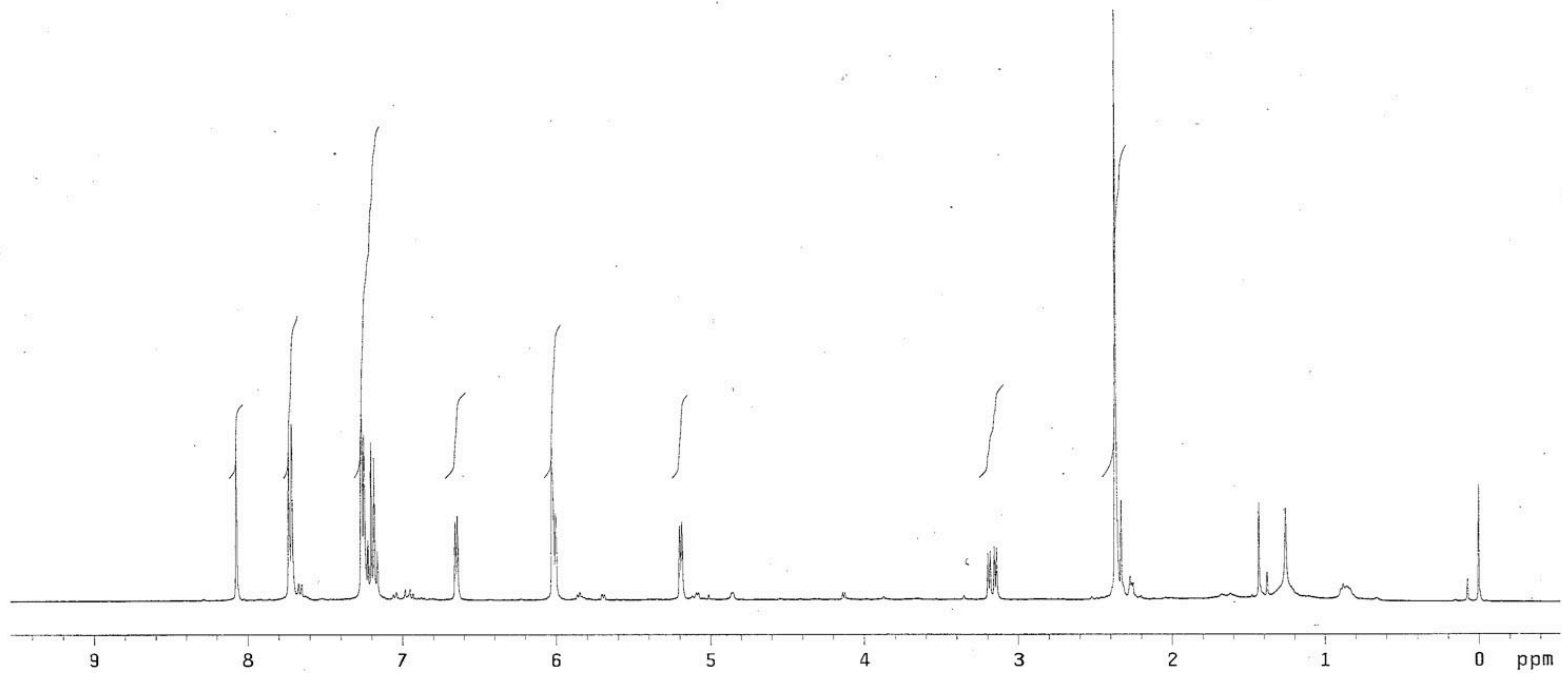

Pulse Sequence: s2pul  
Spectrometer: 100.53  
Solvent: CDCl<sub>3</sub>

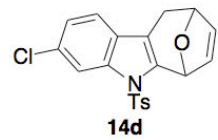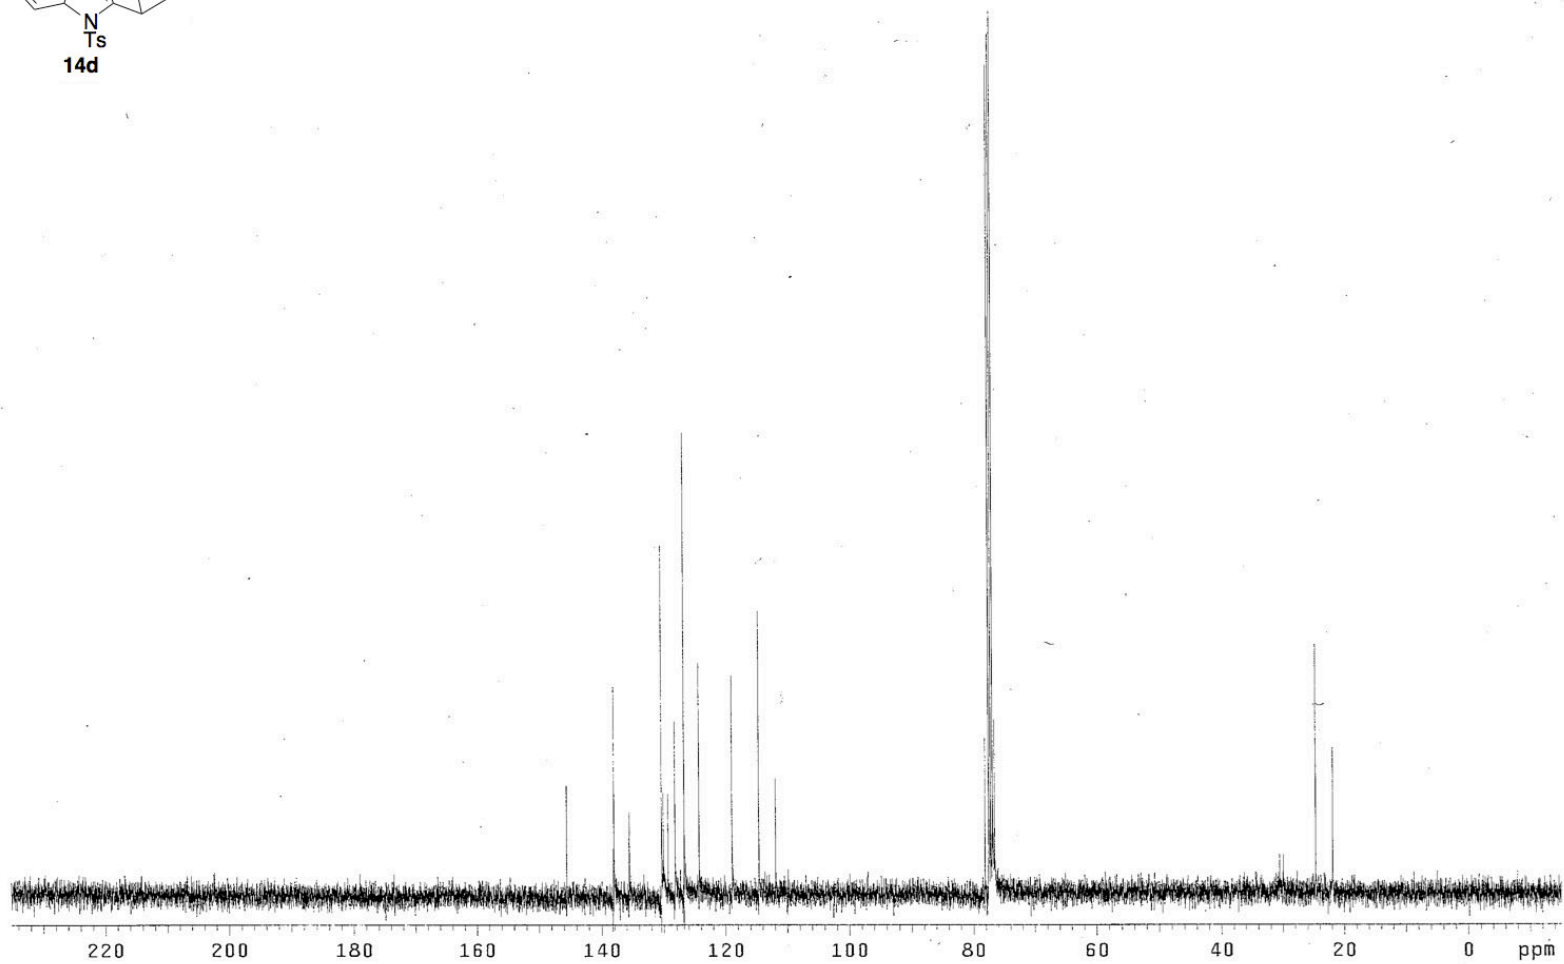

Pulse Sequence: s2pul  
Spectrometer: 399.79  
Solvent: CDCl<sub>3</sub>

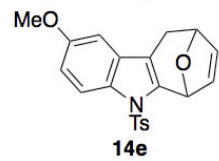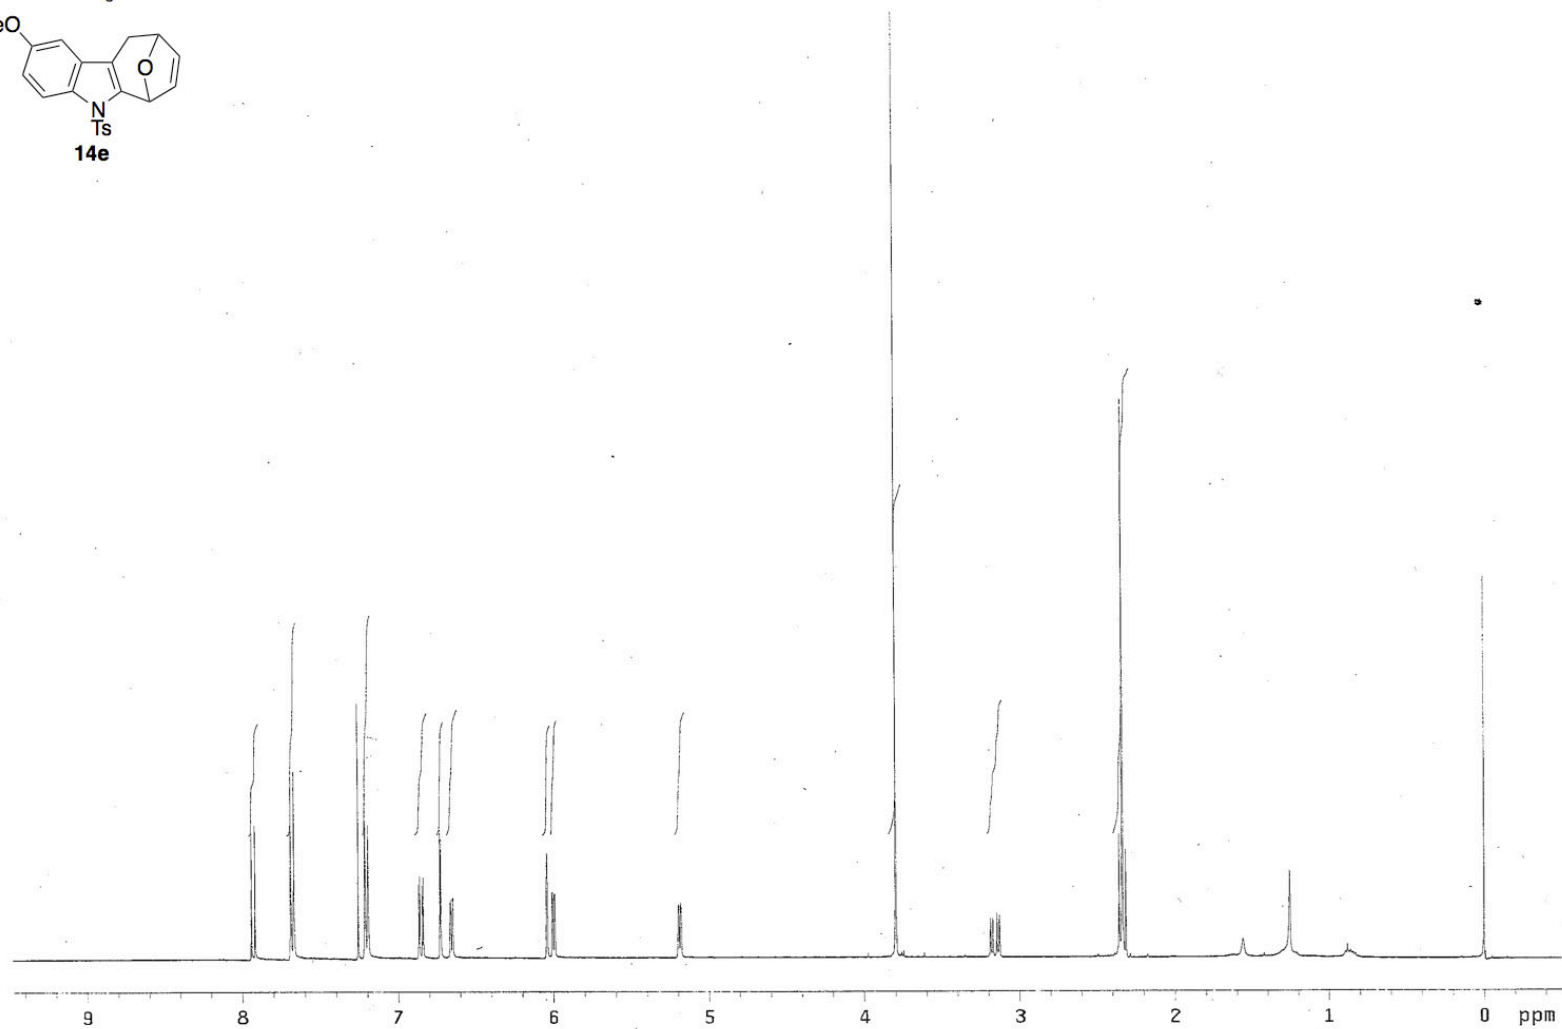



Pulse Sequence: s2pul  
Spectrometer: 100.53  
Solvent: CDCl<sub>3</sub>

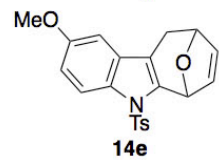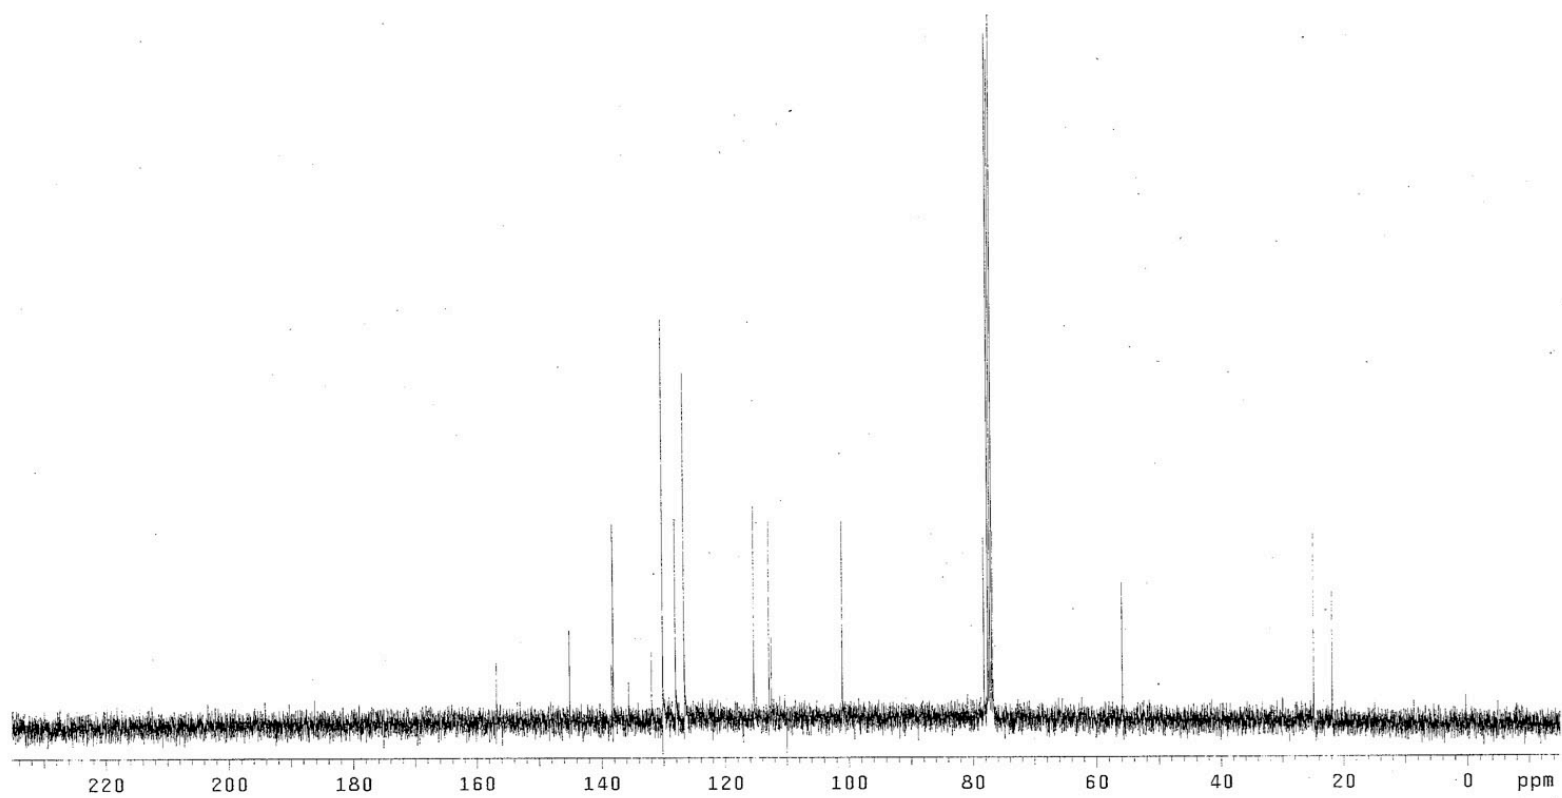

Pulse Sequence: s2pul  
Spectrometer: 399.79  
Solvent: CDCl<sub>3</sub>

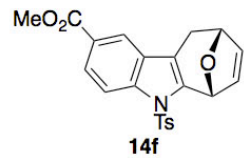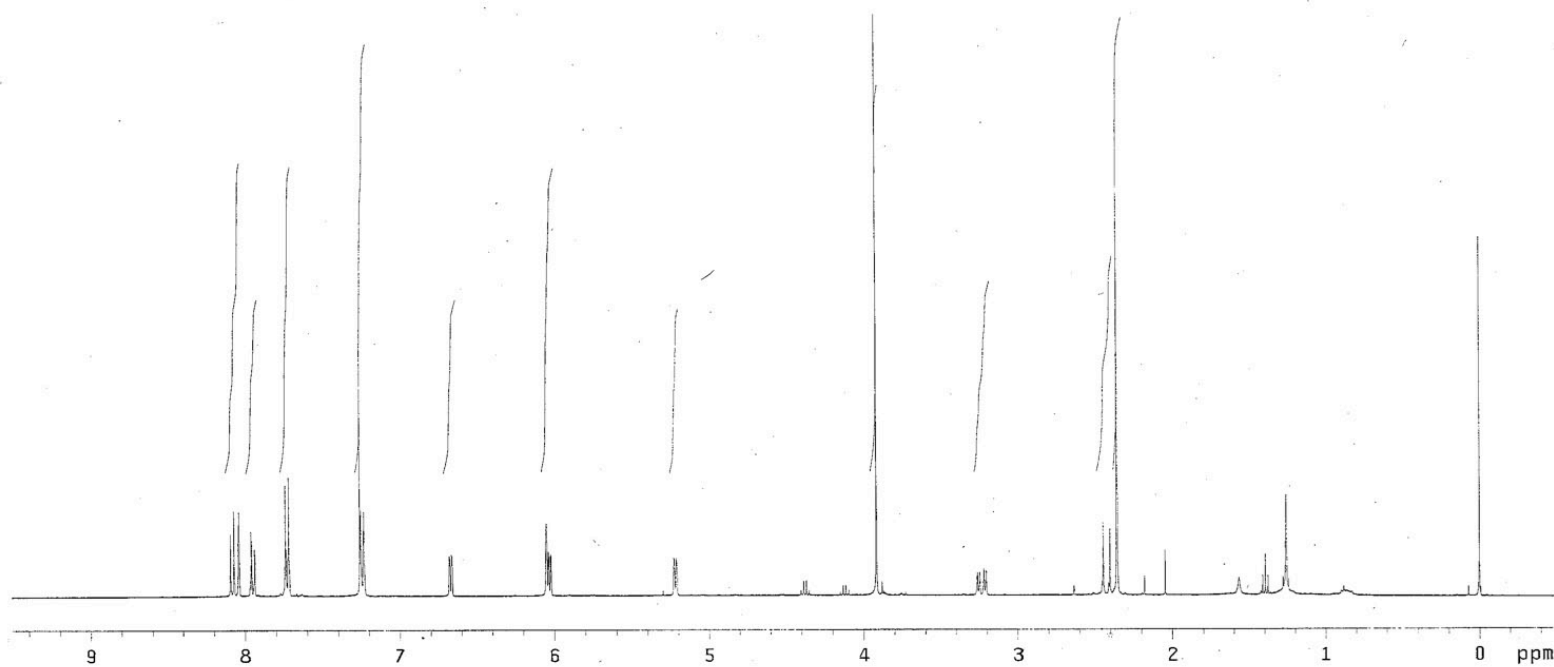

Pulse Sequence: s2pul  
Spectrometer: 100.53  
Solvent: CDCl<sub>3</sub>

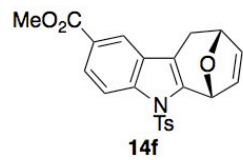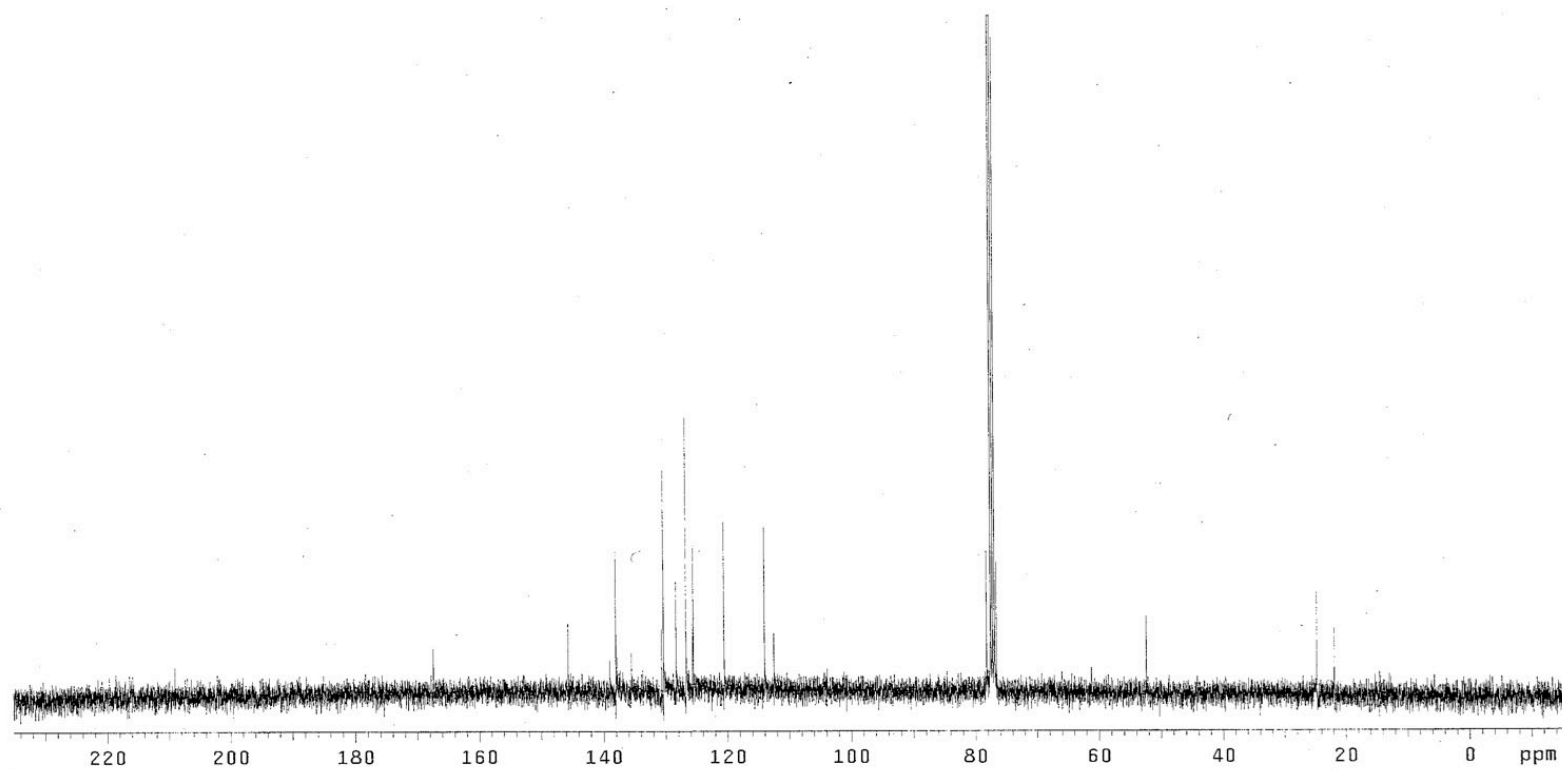

Pulse Sequence: s2pul  
Spectrometer: 399.79  
Solvent: CDCl<sub>3</sub>

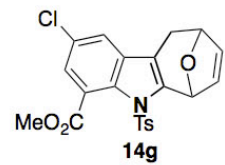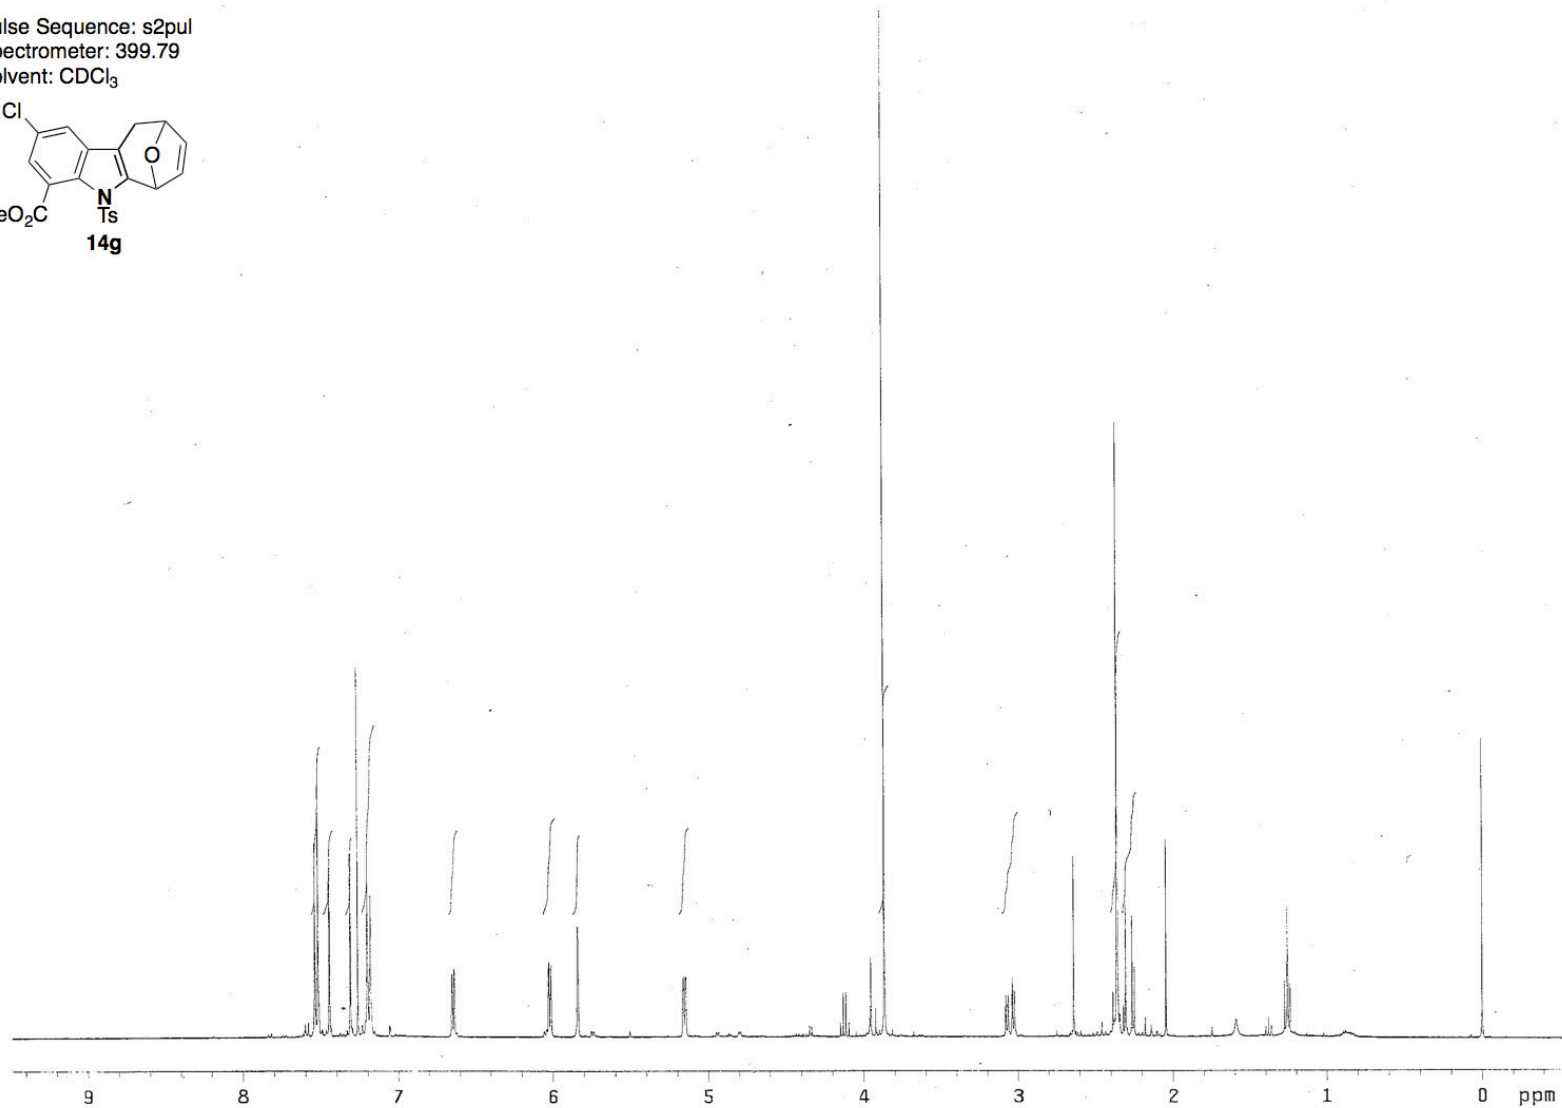

Pulse Sequence: s2pul  
Spectrometer: 100.53  
Solvent: CDCl<sub>3</sub>

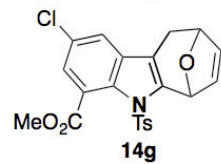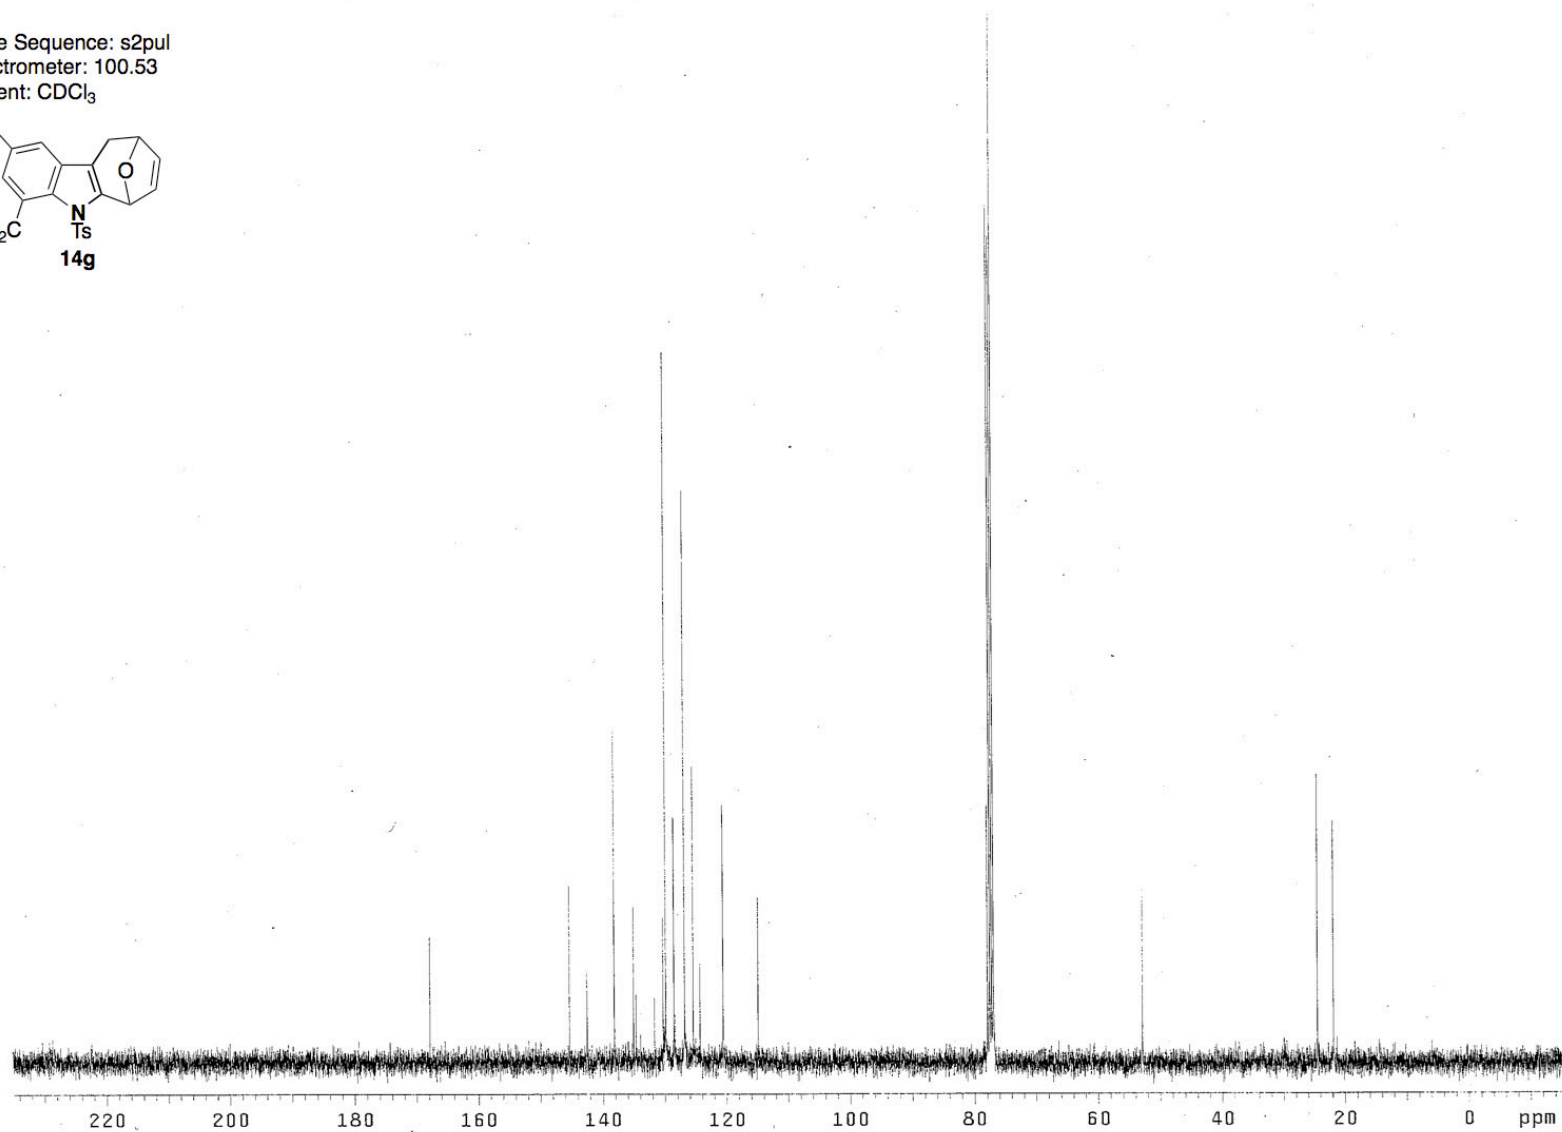

Pulse Sequence: s2pul  
Spectrometer: 399.79  
Solvent: CDCl<sub>3</sub>

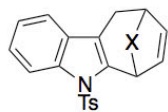

14h: X = NBoc

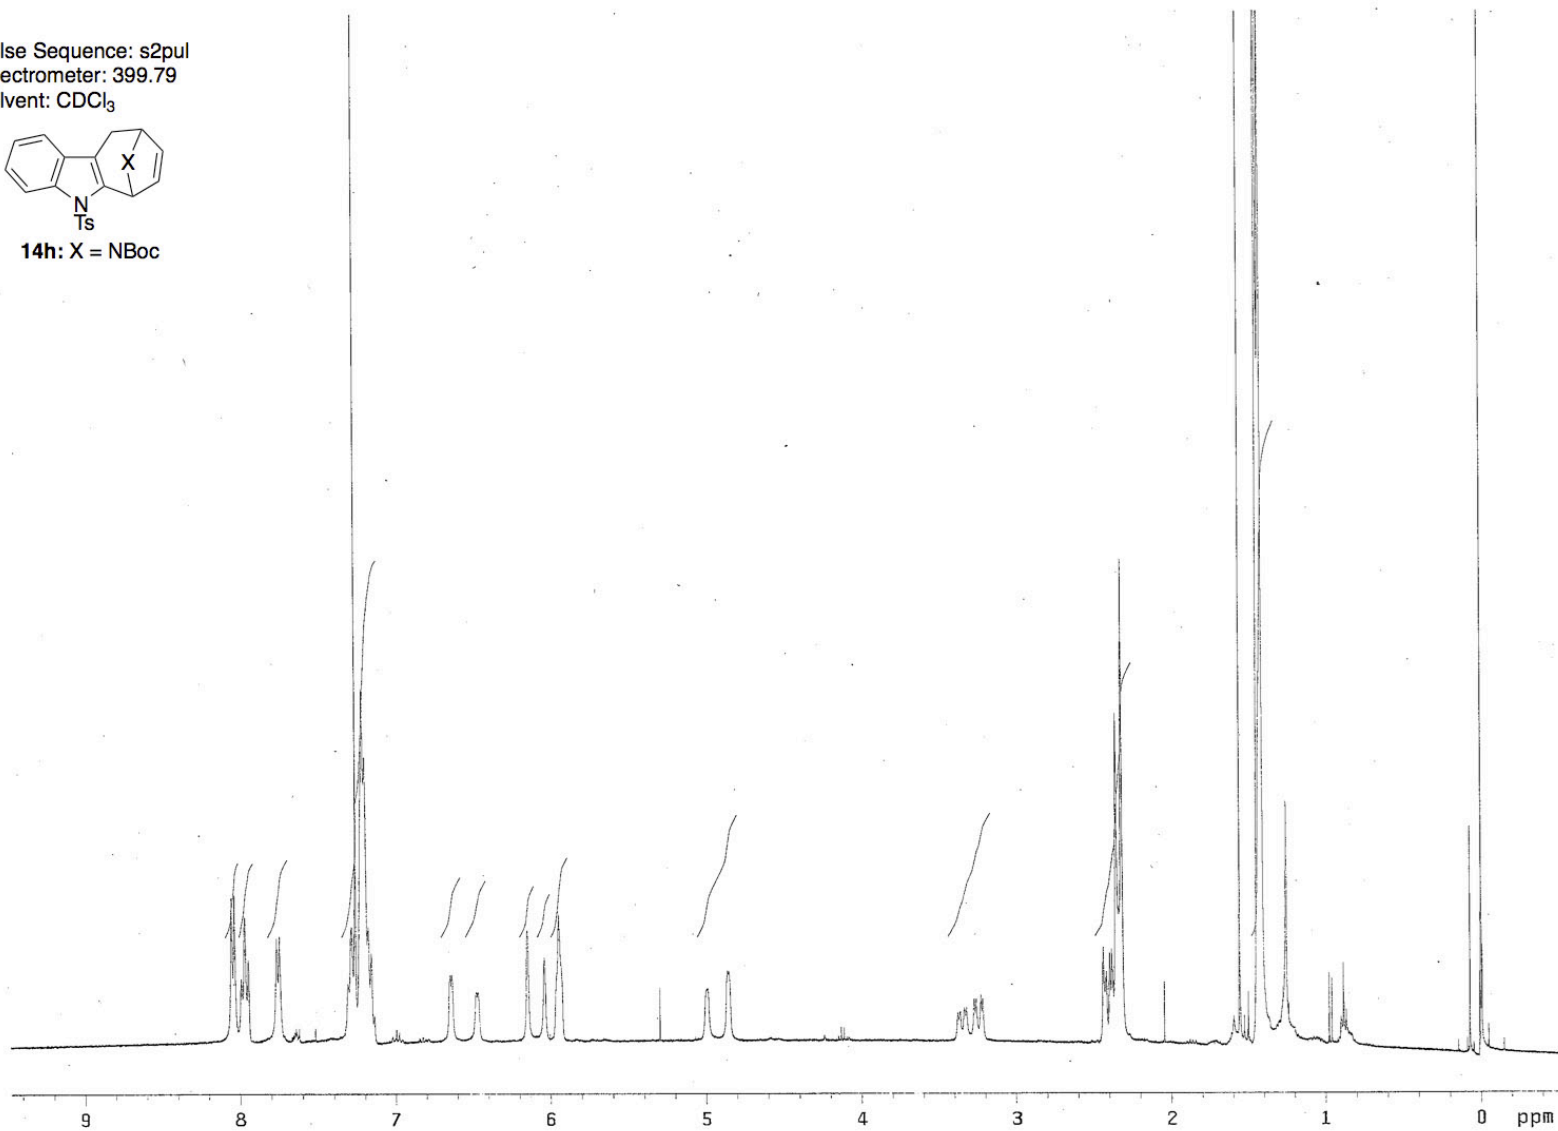

Pulse Sequence: s2pul  
Spectrometer: 100.53  
Solvent: CDCl<sub>3</sub>

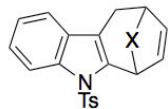

14h: X = NBoc

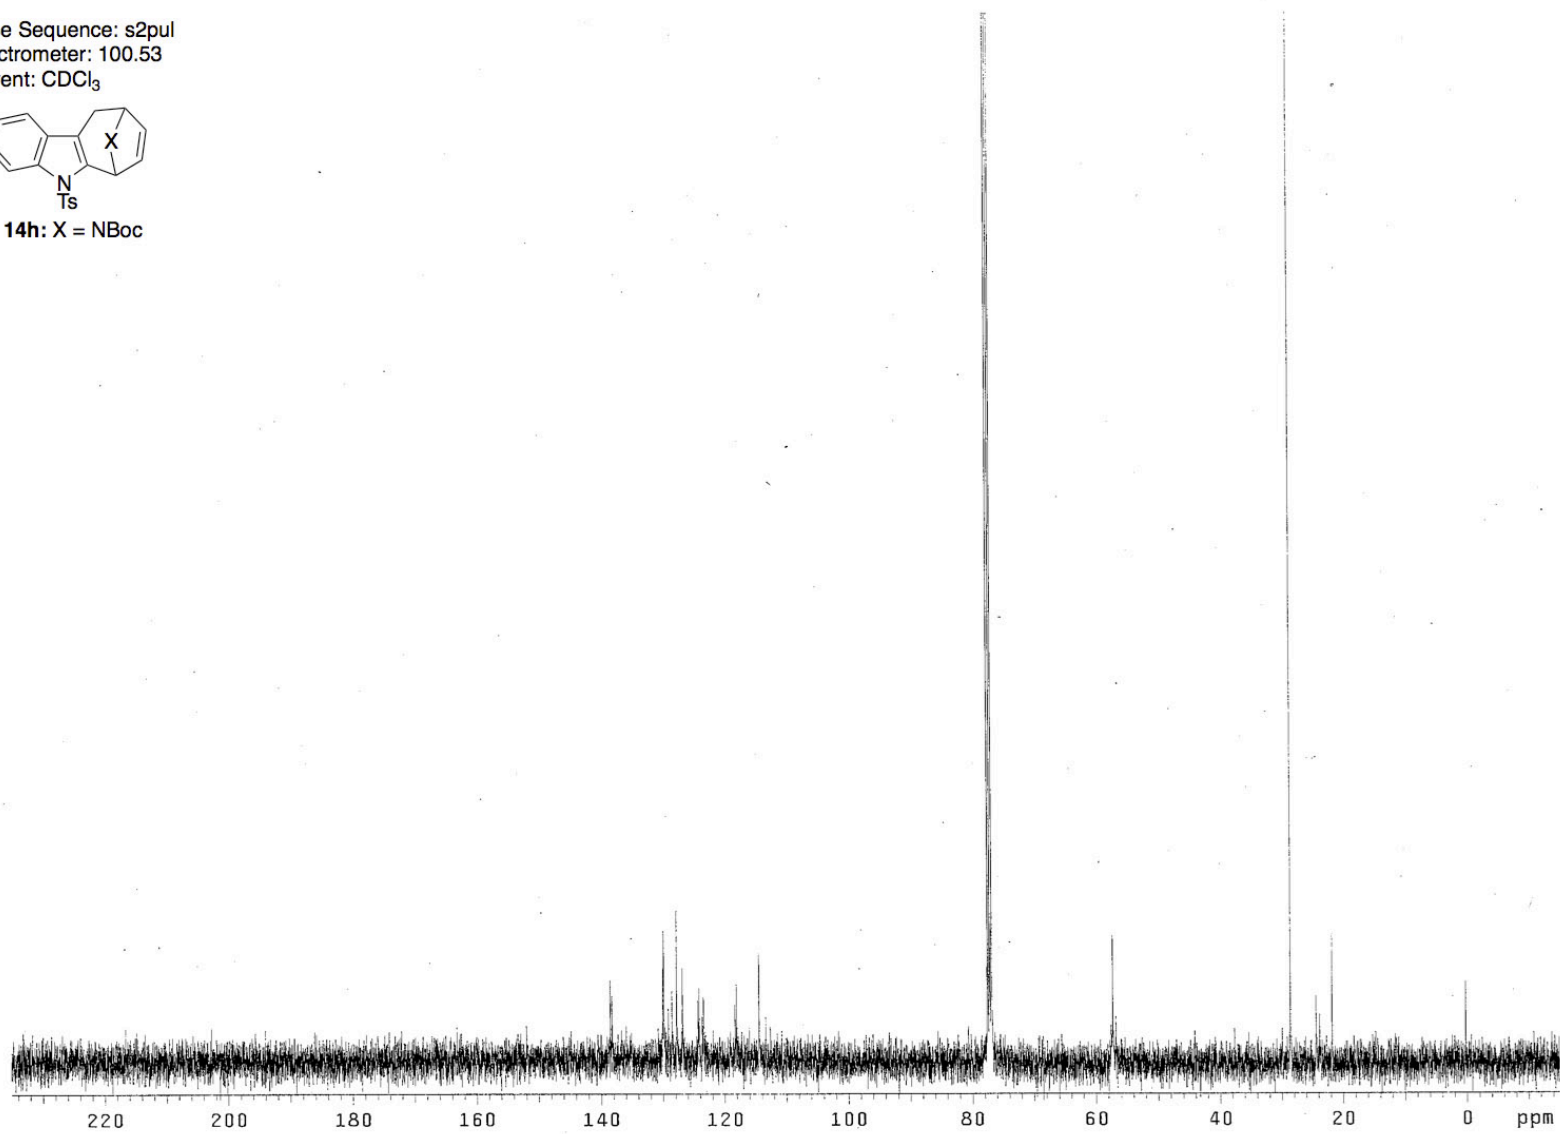

Pulse Sequence: s2pul  
Spectrometer: 499.73  
Solvent: toluene-D8  
Temp: 25°C

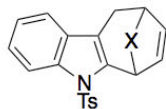

14h: X = NBoc

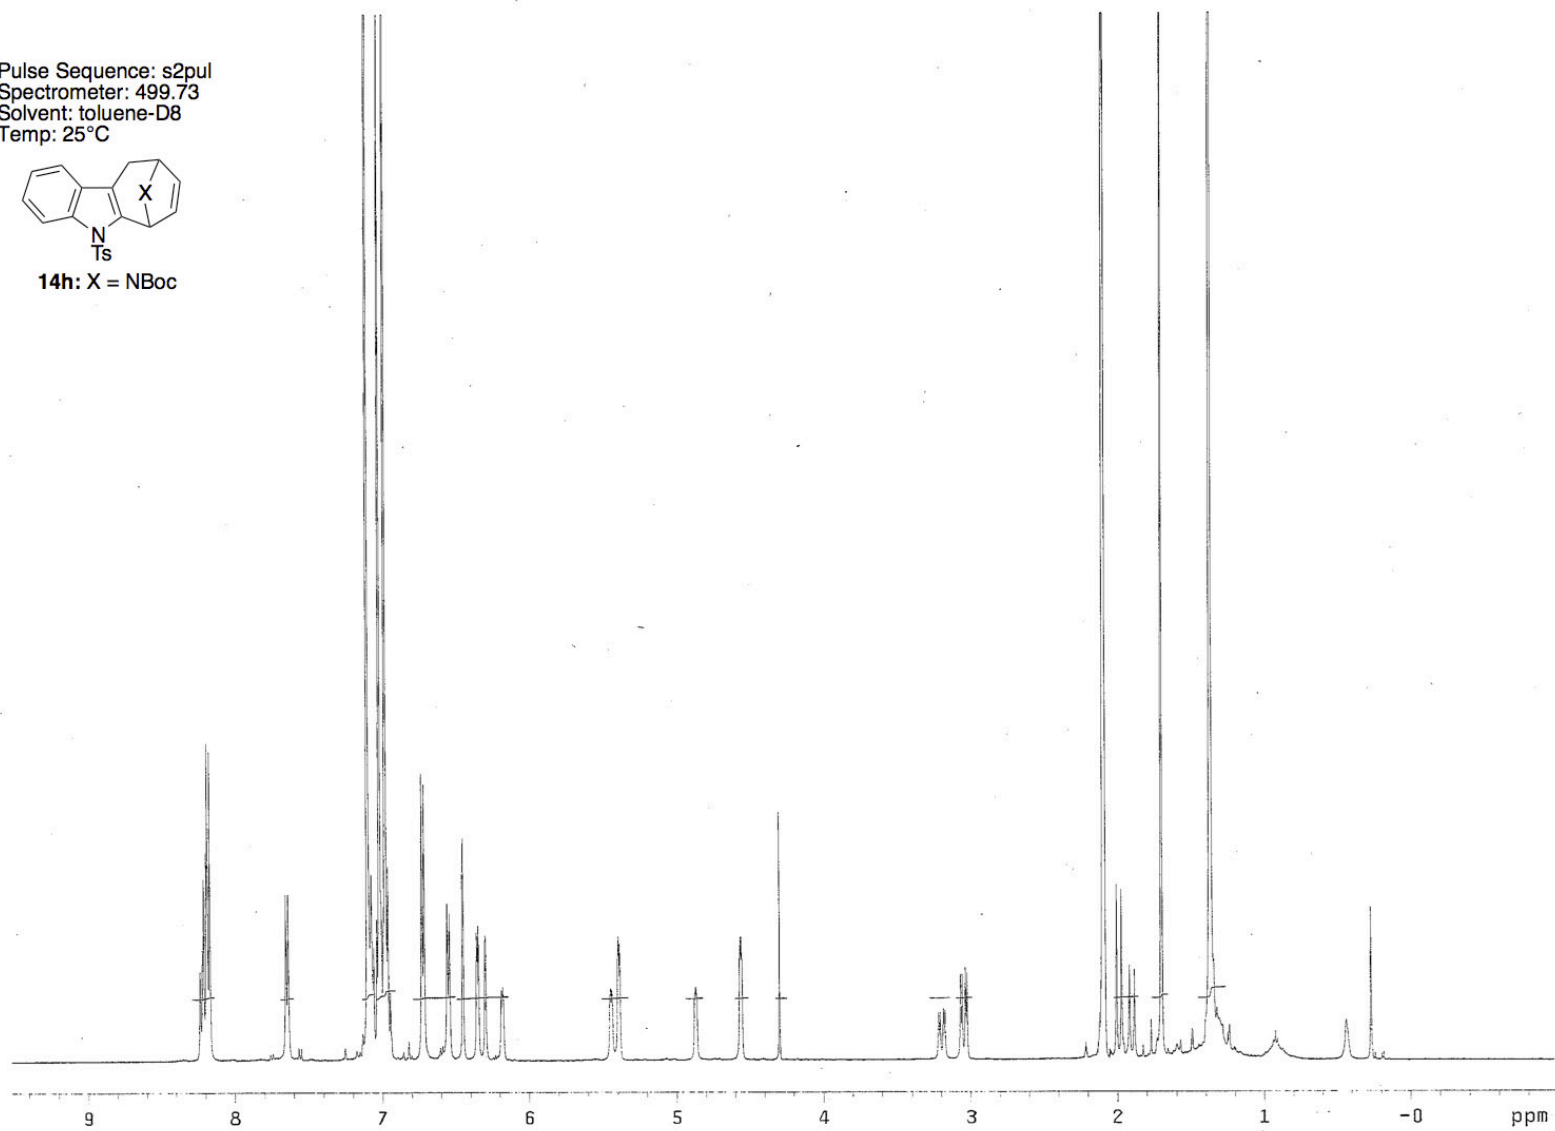



Pulse Sequence: s2pul  
Spectrometer: 499.73  
Solvent: toluene-D8  
Temp: 50°C

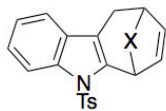

14h: X = NBoc

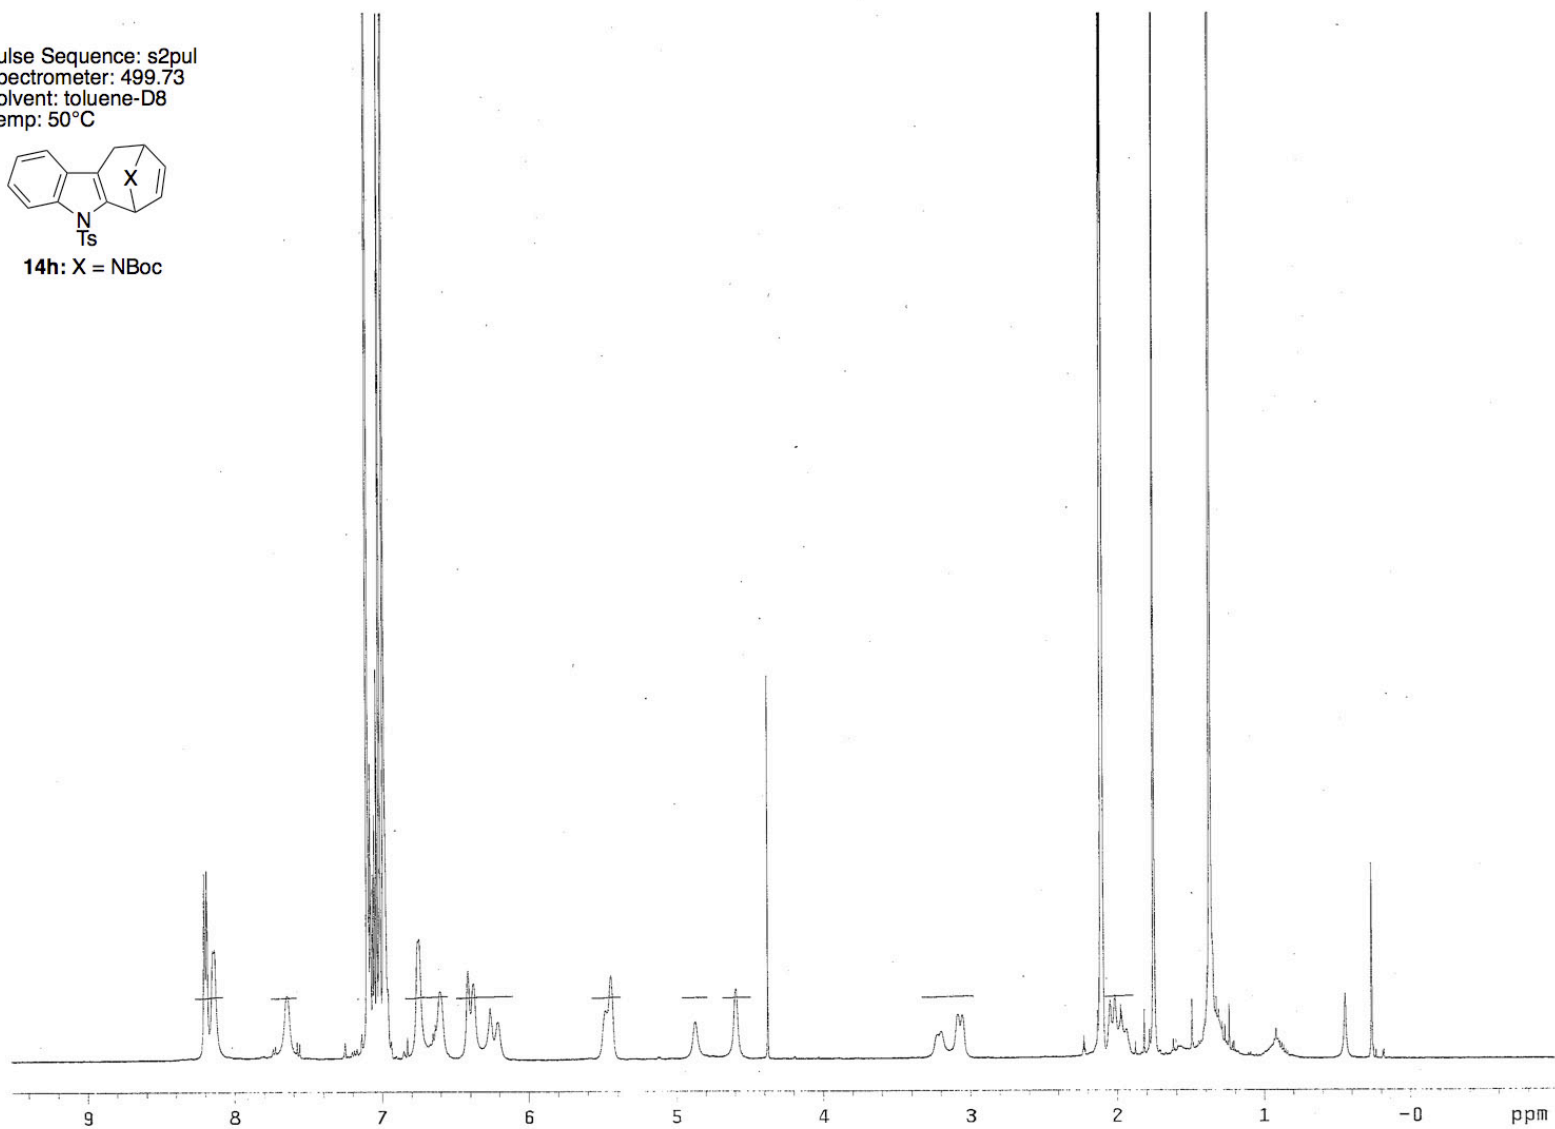

Pulse Sequence: s2pul  
Spectrometer: 499.73  
Solvent: toluene-D8  
Temp: 80°C

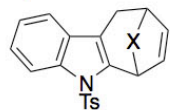

14h: X = NBoc

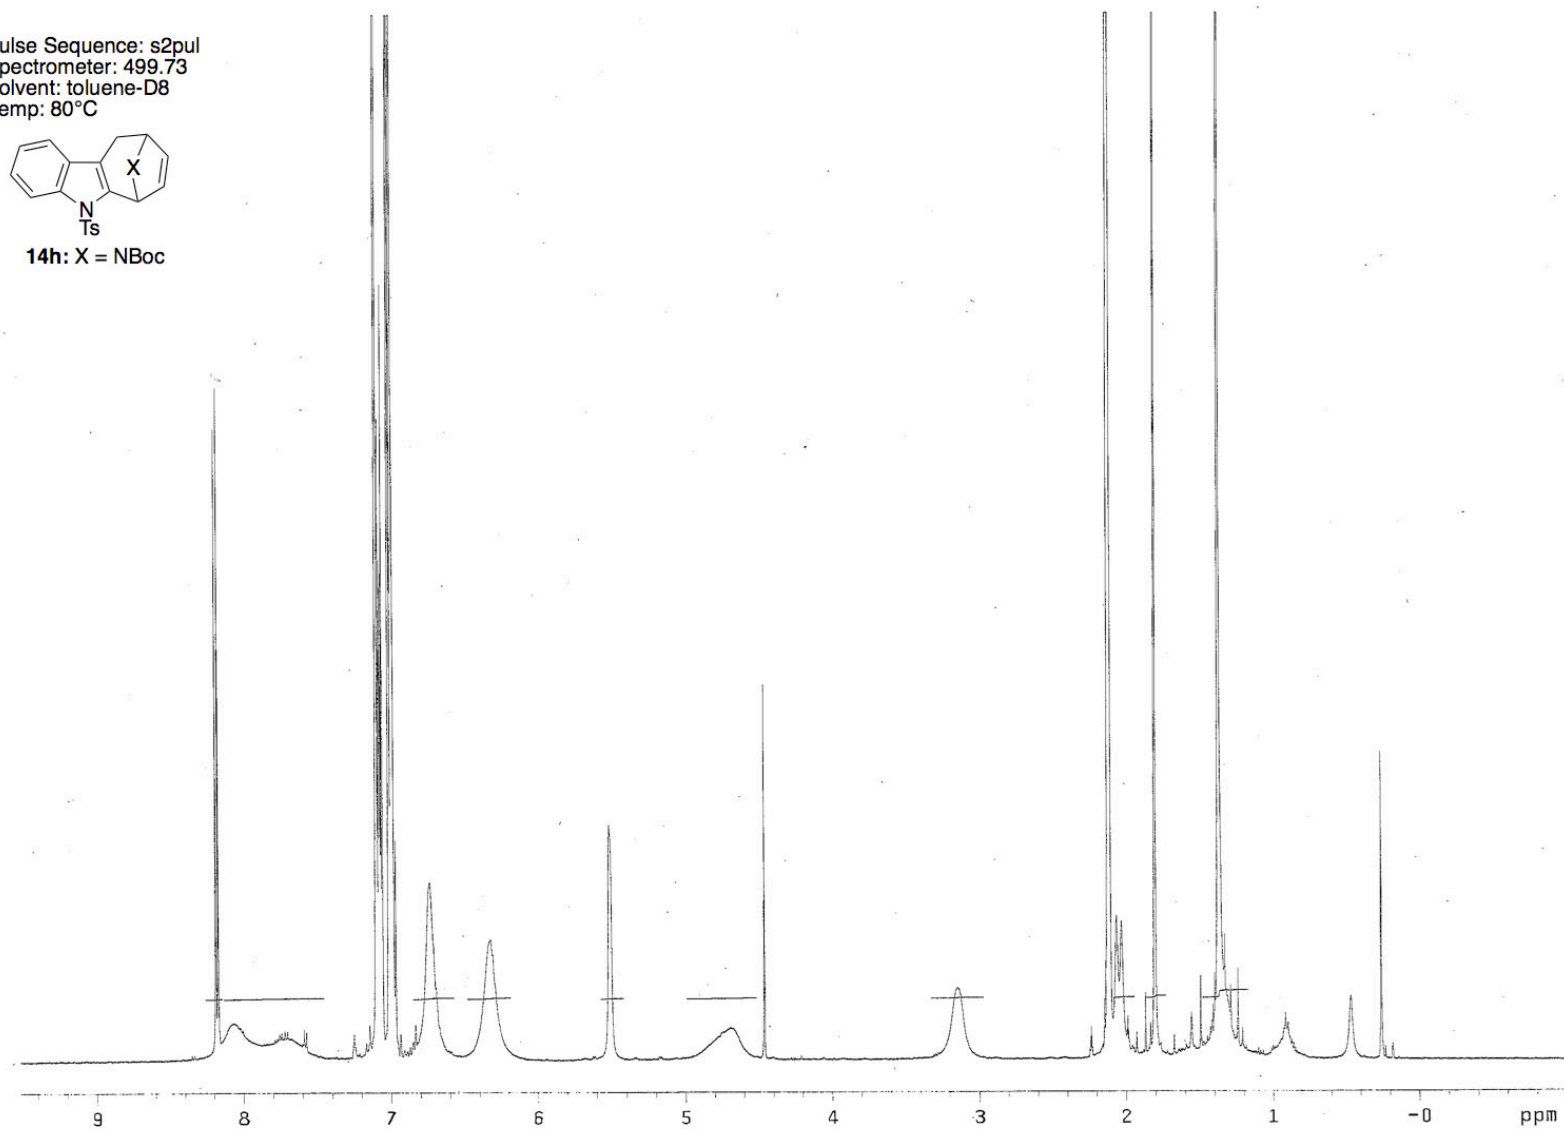

Pulse Sequence: s2pul  
Spectrometer: 399.79  
Solvent: CDCl<sub>3</sub>

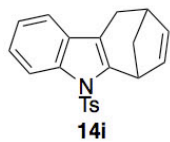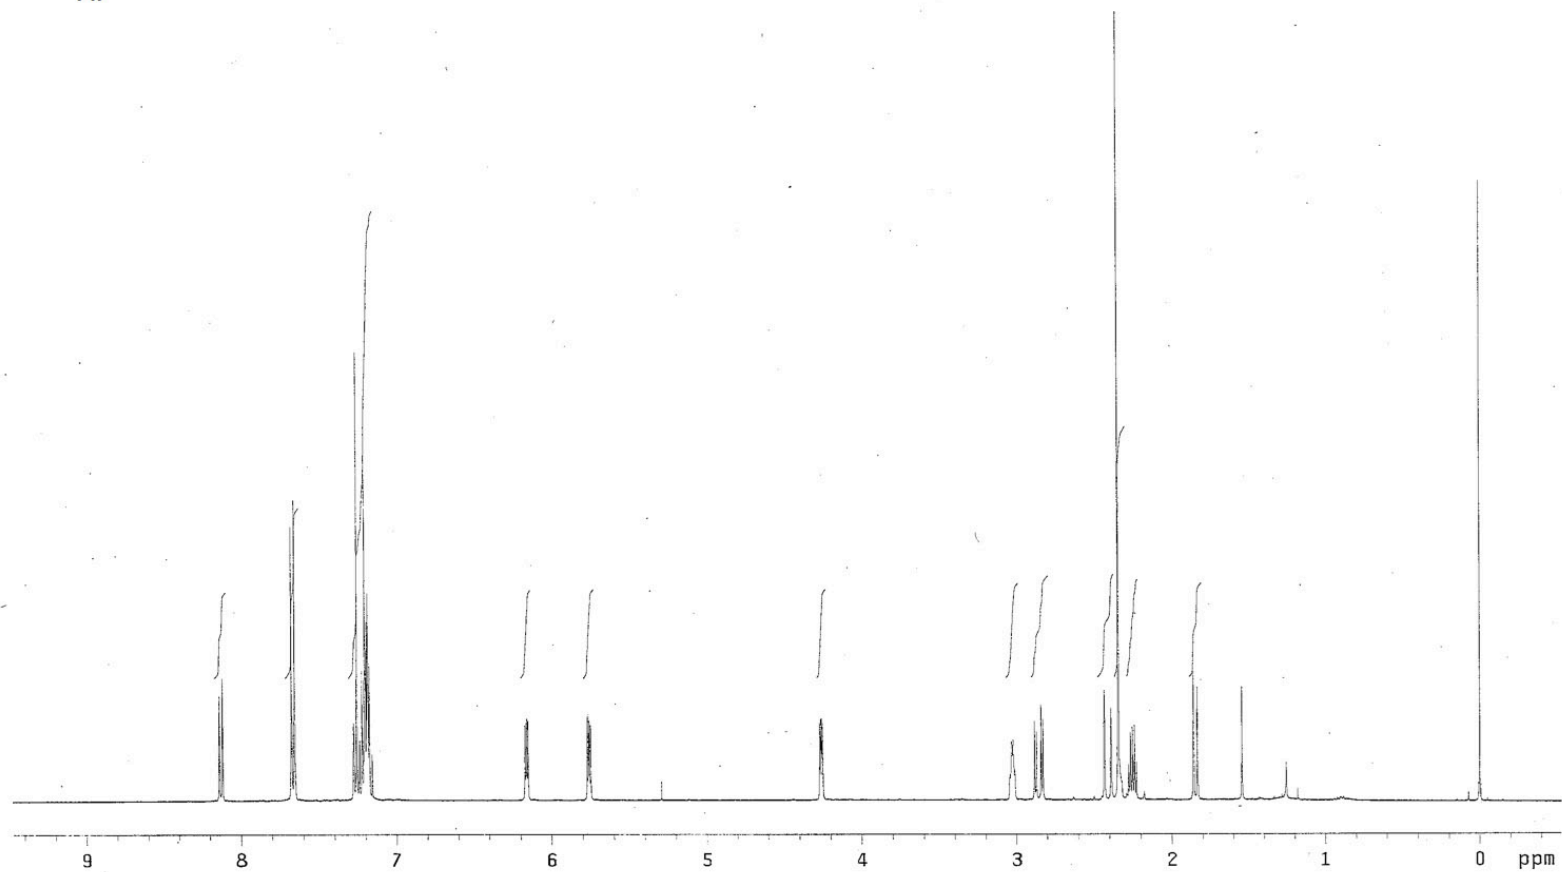

Pulse Sequence: s2pul  
Spectrometer: 100.53  
Solvent: CDCl<sub>3</sub>

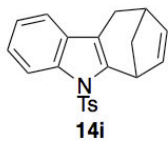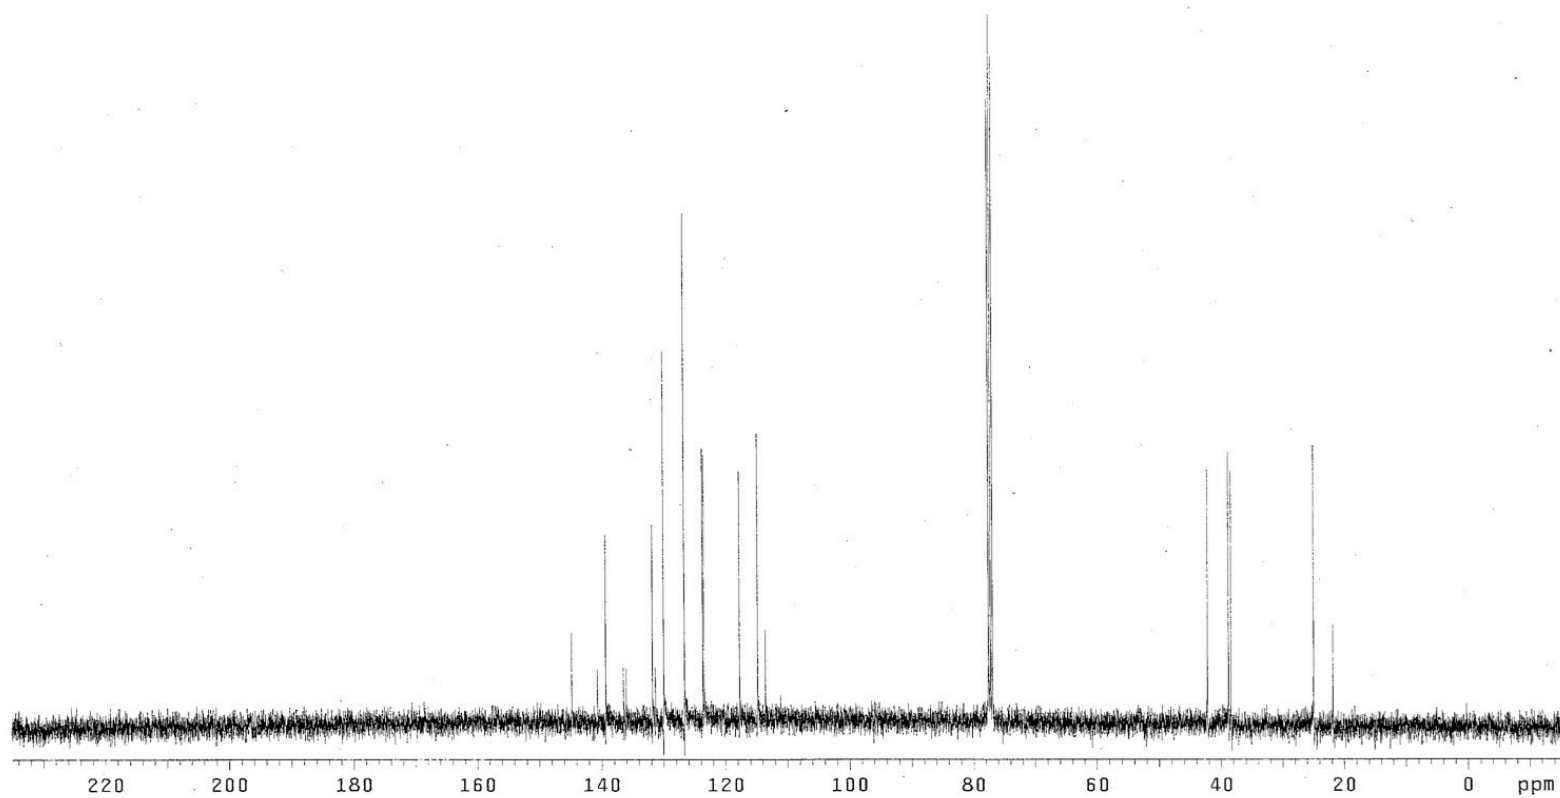

Pulse Sequence: s2pul  
Spectrometer: 399.79  
Solvent: CDCl<sub>3</sub>

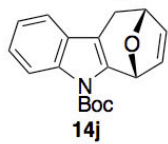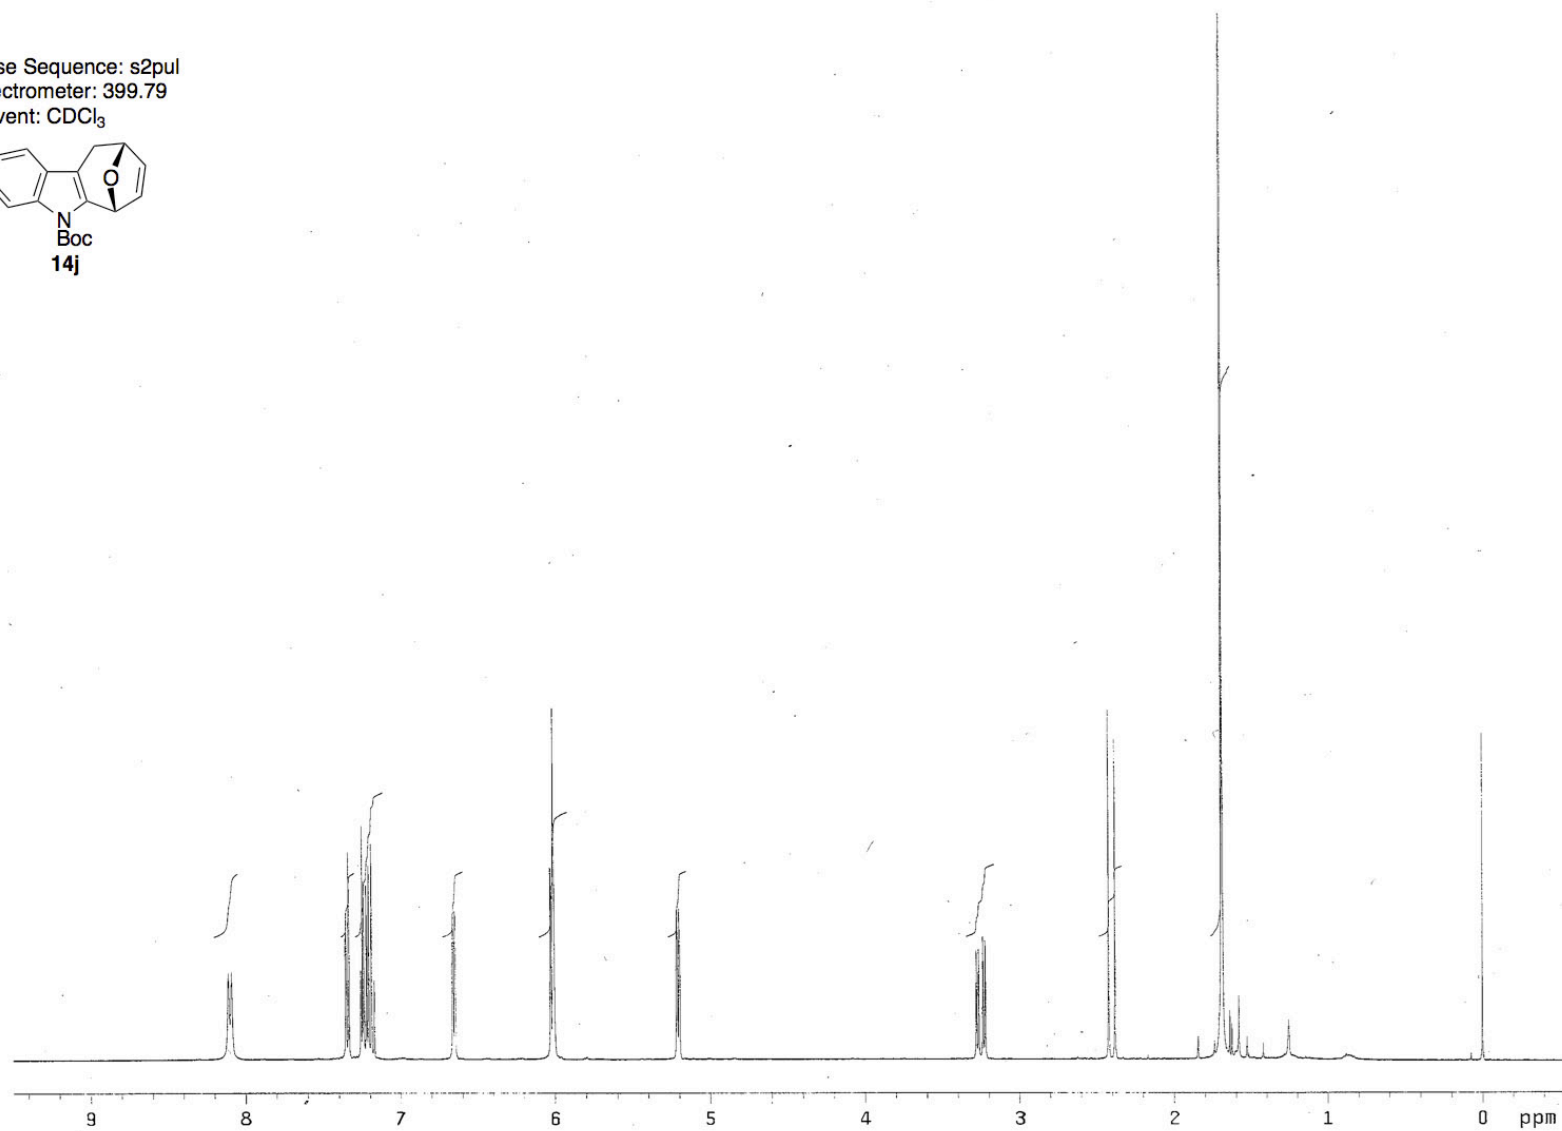

Pulse Sequence: s2pul  
Spectrometer: 100.53  
Solvent: CDCl<sub>3</sub>

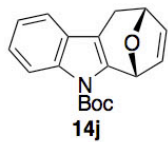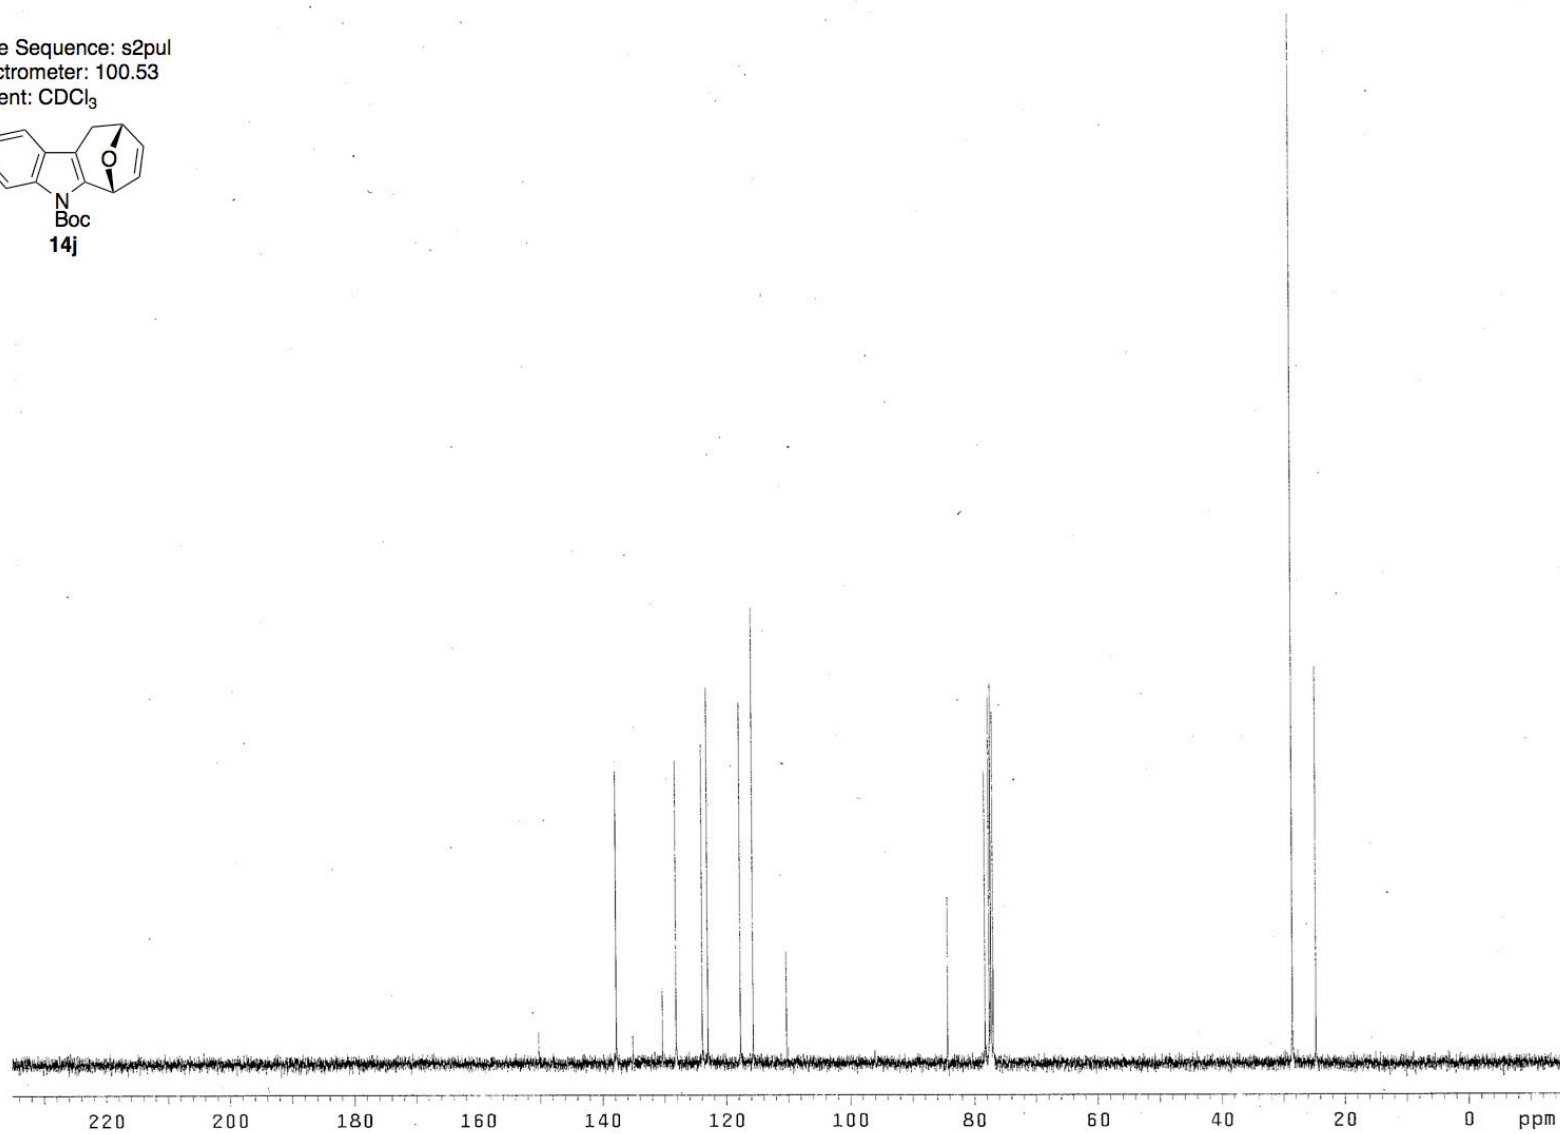

Pulse Sequence: s2pul  
Spectrometer: 399.79  
Solvent: CDCl<sub>3</sub>

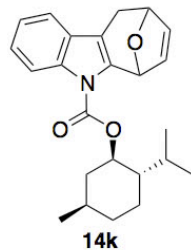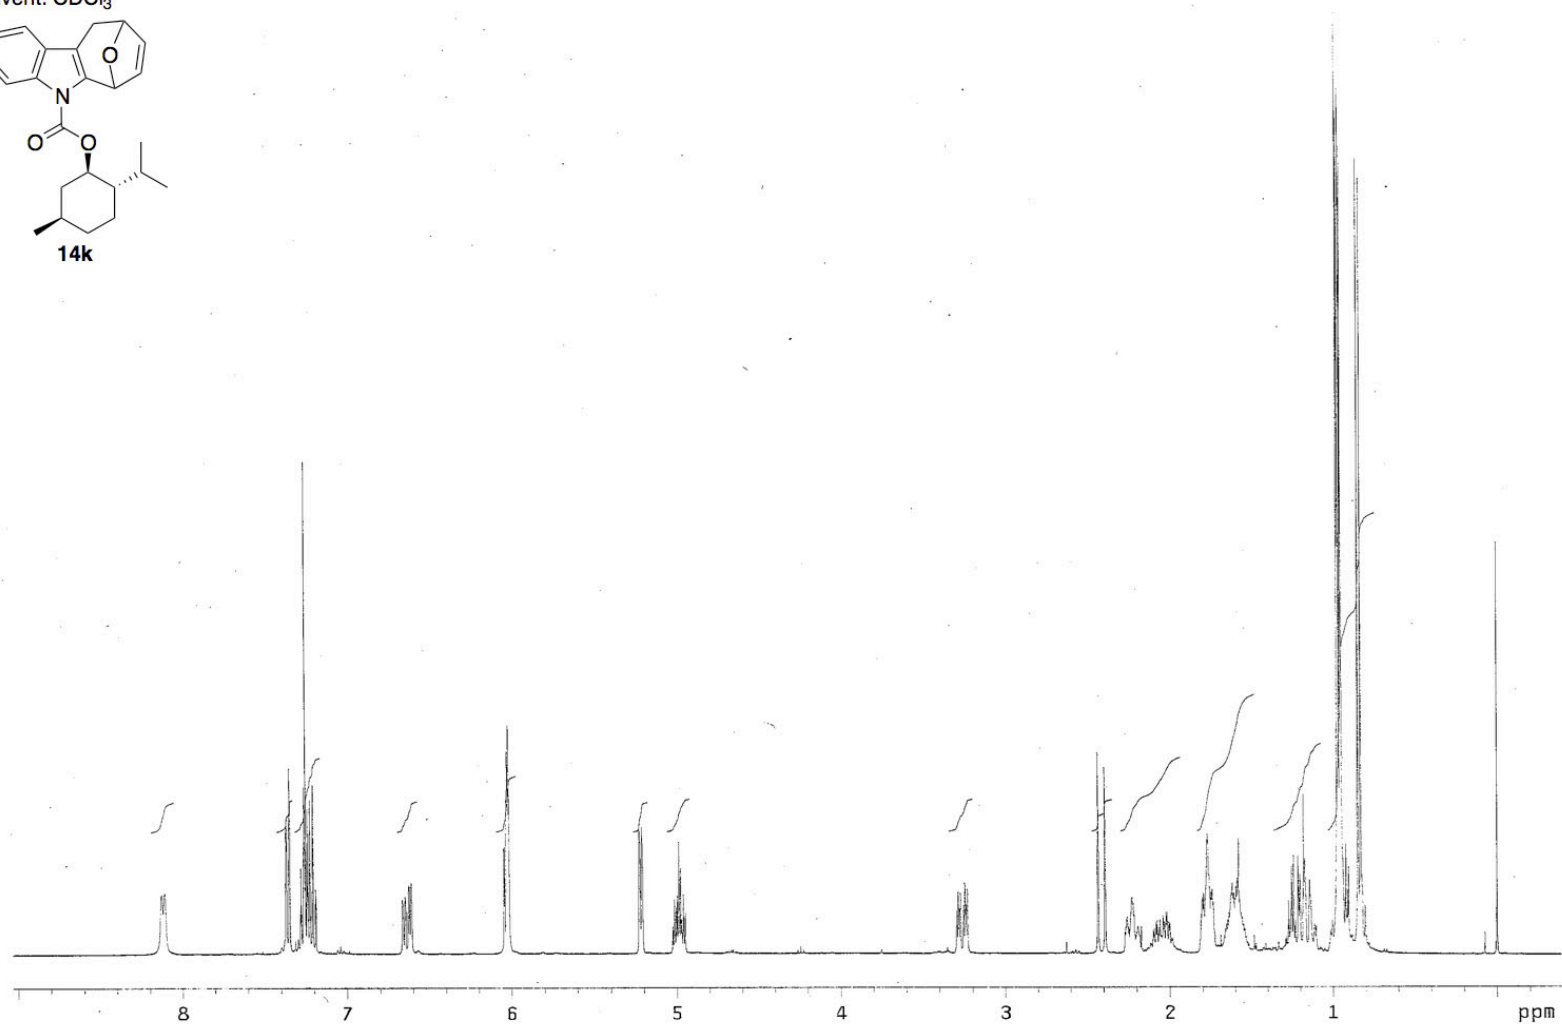

Pulse Sequence: s2pul  
Spectrometer: 100.53  
Solvent: CDCl<sub>3</sub>

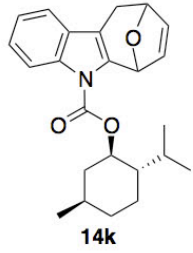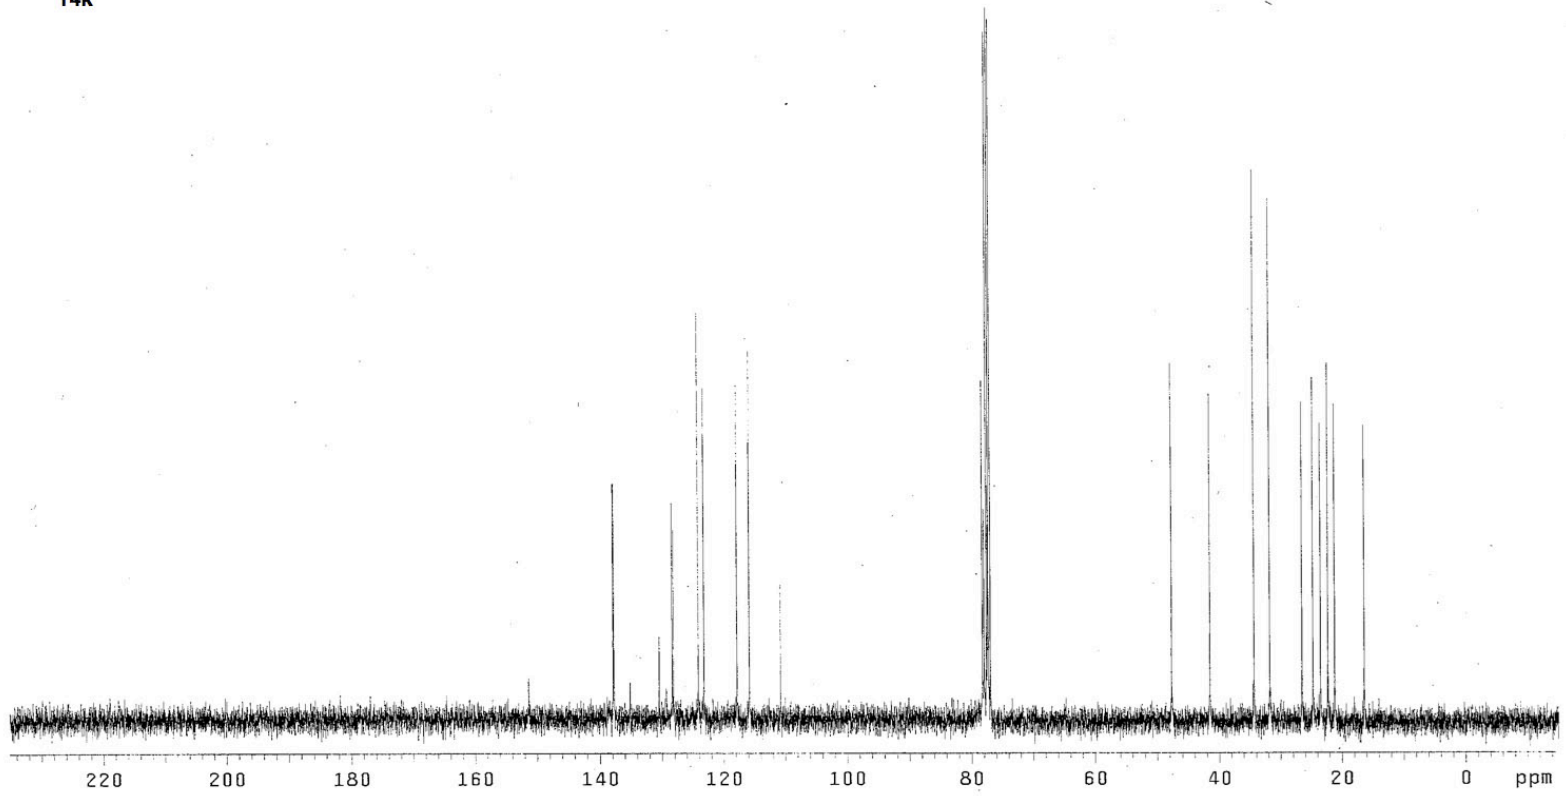





Pulse Sequence: s2pul  
Spectrometer: 100.53  
Solvent: CDCl<sub>3</sub>

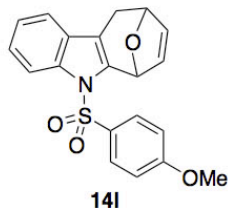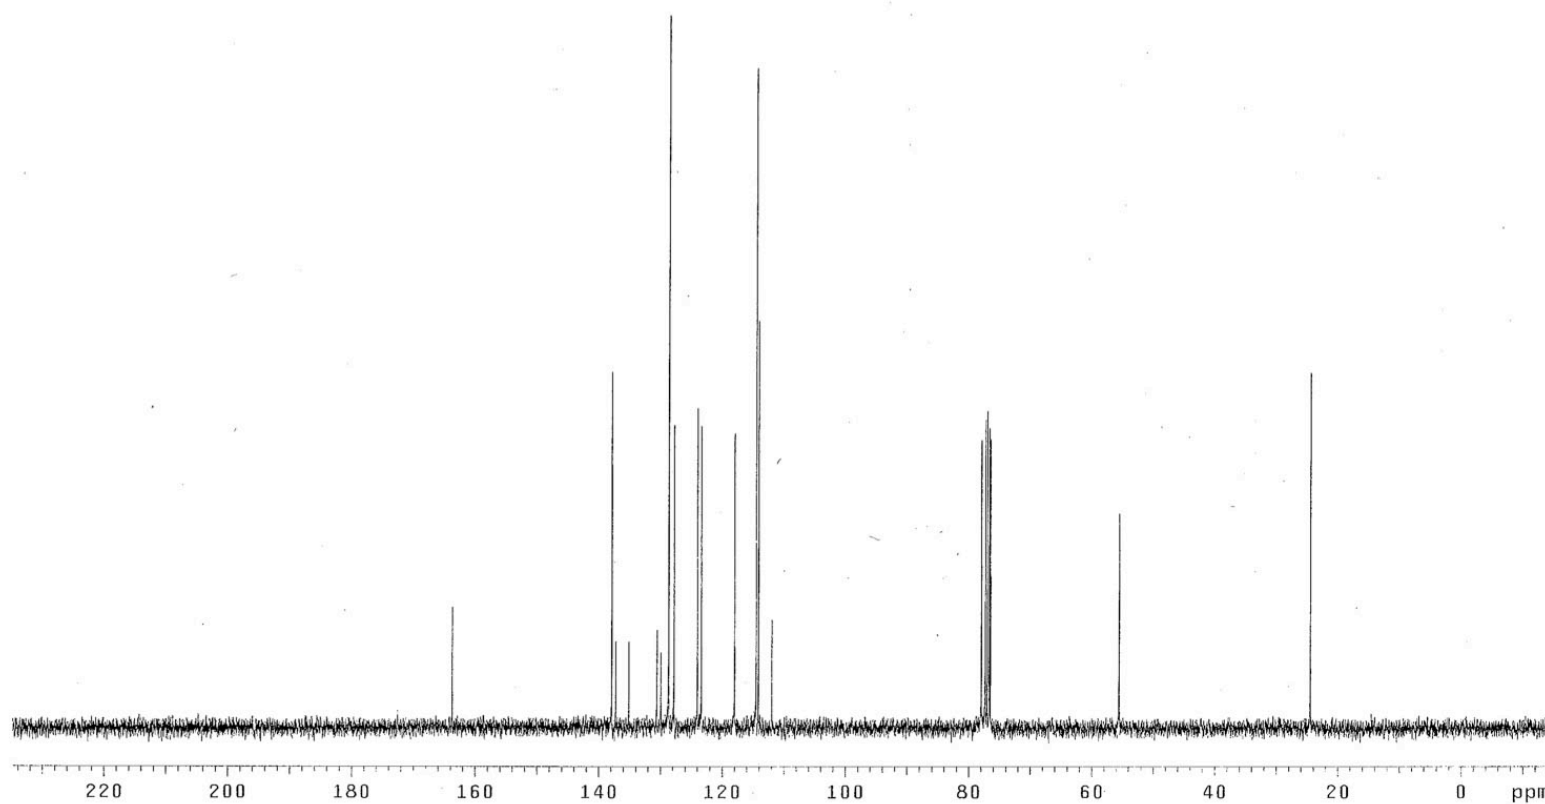

Supplement: ol5006455_si_002.pdf [file ol5006455_si_002.pdf]
